# Supplementary material
Source: publisher figshare collection journal article supplement (https://gsajournals.figshare.com/ndownloader/files/23596628)
Supplement: Supplementary file 1 [file 23596628]

## Sheet: Table S1
Supplemental Table 1: List of all significant cis-eQTL found in the liver of DO mice using diet as an additive covariate.
Transcription cluster ID	Gene symbol	Gene name	ENTREZID	Probe position				SNP markers ID	Marker position				LOD threshold at P<0.05	LOD threshold at P<0.01	LOD threshold at P<0.63	Obtained LOD score	eQTL type
				Chromosome	Strand	Start (Mb)	Stop (Mb)		Chromosome	Position (Mb)	BCI low (Mb)	BCI high (Mb)
17211000	Rrs1	ribosome biogenesis regulator 1	59014	chr1	+	9.54542	9.54732	UNC49074	chr1	7.5217	3.01027	10.3073	7.45351	8.35927	6.22619	9.7627	cis
17211004	Adhfe1	alcohol dehydrogenase, iron containing, 1	76187	chr1	+	9.54797	9.57636	UNC86947	chr1	10.0634	7.31344	12.1818	7.52178	8.70589	6.19005	13.5024	cis
17211033	1700034P13Rik	RIKEN cDNA 1700034P13 gene	73331	chr1	+	9.74766	9.79151	UNC81870	chr1	9.67195	5.63419	10.2115	7.5246	8.19442	6.21336	14.1771	cis
17211043	Sgk3	serum/glucocorticoid regulated kinase 3	170755	chr1	+	9.79819	9.90185	backupJAX00000484	chr1	9.55397	4.80928	12.8805	7.43233	8.46846	6.18715	19.7599	cis
17213139	Bzw1	basic leucine zipper and W2 domains 1	66882	chr1	+	58.3931	58.4063	UNC752248	chr1	59.2377	58.2565	59.3585	7.37916	8.14473	6.2447	10.9322	cis
17213179	Ndufb3	NADH dehydrogenase (ubiquinone) 1 beta subcomplex 3	66495	chr1	+	58.5864	58.5959	backupUNC010101265	chr1	58.3764	58.2565	58.8961	7.63006	8.44139	6.22328	23.6143	cis
17213189	Gm20257	caspase 8 pseudogene	100504501	chr1	+	58.6552	58.6557	UNC747160	chr1	58.7593	58.2213	59.3585	7.54097	8.12994	6.24312	8.61068	cis
17213192	Cflar	CASP8 and FADD-like apoptosis regulator	12633	chr1	+	58.7115	58.7583	UNC748270	chr1	58.8624	58.2213	59.3585	7.42968	8.38917	6.17054	10.8511	cis
17213213	Casp8	caspase 8	12370	chr1	+	58.7955	58.8474	UNC747160	chr1	58.7593	58.2565	58.8961	7.41706	8.30525	6.20073	36.4006	cis
17213226	Stradb	STE20-related kinase adaptor beta	227154	chr1	+	58.9735	58.9955	UNC742627	chr1	58.3147	54.2177	59.3083	7.40676	8.23451	6.19146	11.9829	cis
17213270	Gm973	predicted gene 973	381260	chr1	+	59.5164	59.6344	JAX00252453	chr1	59.7099	59.3083	59.8595	7.74121	8.58635	6.23046	30.3486	cis
17234192	Zwint	ZW10 interactor	52696	chr10	+	72.6549	72.6747	UNC18206991	chr10	71.888	71.4187	73.7852	7.40585	8.21106	6.22055	34.1576	cis
17234213	Pcdh15	protocadherin 15	11994	chr10	+	73.822	74.647	JAX00019474	chr10	72.7803	71.0252	74.5784	7.45807	8.32268	6.16138	16.4531	cis
17234347	Upb1	ureidopropionase, beta	103149	chr10	+	75.4069	75.4411	UNC18246512	chr10	75.3184	70.9048	76.1483	7.3952	8.54726	6.24405	14.079	cis
17427389	Cyp2j6	cytochrome P450, family 2, subfamily j, polypeptide 6	13110	chr4	-	96.5168	96.5536	UNC7790951	chr4	96.7818	96.5295	97.157	7.50739	8.48882	6.20207	36.2487	cis
17427401	Cyp2j9	cytochrome P450, family 2, subfamily j, polypeptide 9	74519	chr4	-	96.5686	96.5916	UNC7793379	chr4	97.0014	95.4399	97.4799	7.52042	8.2579	6.188	21.5971	cis
17427414	Cyp2j5	cytochrome P450, family 2, subfamily j, polypeptide 5	13109	chr4	-	96.6276	96.6641	UNC7789664	chr4	96.5922	96.5208	97.4799	7.52037	8.45039	6.17206	21.1179	cis
17427456	LOC102637577	uncharacterized LOC102637577	102637577	chr4	-	97.7541	97.7574	UNC7801297	chr4	97.6105	97.4745	98.8414	7.55598	8.3885	6.17032	14.1077	cis
17427494	Dock7	dedicator of cytokinesis 7	67299	chr4	-	98.9371	99.0896	UNC7828538	chr4	99.6636	98.7593	100.794	7.48351	8.43862	6.19909	19.0678	cis
17427563	Itgb3bp	integrin beta 3 binding protein (beta3-endonexin)	67733	chr4	-	99.7662	99.9291	UNC7842814	chr4	100.794	99.5459	101	7.45169	8.15127	6.18603	12.408	cis
17427661	Wdr78	WD repeat domain 78	242584	chr4	-	103.039	103.114	UNC7856015	chr4	101.733	101.535	104.154	7.44828	8.23181	6.17566	22.6968	cis
17427686	Slc35d1	solute carrier family 35 (UDP-glucuronic acid/UDP-N-acetylgalactosamine dual transporter), member D1	242585	chr4	-	103.171	103.215	JAX00560280	chr4	103.612	101.335	104.045	7.42196	8.30942	6.24806	14.9364	cis
17427746	Prkaa2	protein kinase, AMP-activated, alpha 2 catalytic subunit	108079	chr4	-	105.031	105.076	backupUNC040545931	chr4	104.91	104.601	105.836	7.4616	8.32725	6.13518	16.1646	cis
17427814	Ttc4	tetratricopeptide repeat domain 4	72354	chr4	-	106.663	106.679	JAX00122955	chr4	107.082	105.649	107.228	7.47438	8.19192	6.23778	26.8525	cis
17427860	Acot11	acyl-CoA thioesterase 11	329910	chr4	-	106.745	106.805	UNC040217933	chr4	106.897	106.608	107.479	7.442	8.22825	6.2082	37.225	cis
17427901	Tceanc2	transcription elongation factor A (SII) N-terminal and central domain containing 2	66526	chr4	-	107.137	107.179	UNC040217933	chr4	106.897	106.3	107.86	7.39659	8.053	6.20255	36.6489	cis
17427917	Lrrc42	leucine rich repeat containing 42	77809	chr4	-	107.234	107.253	UNC040215368	chr4	105.921	104.362	114.641	7.61659	8.68513	6.22842	7.7109	cis
17427928	Dio1	deiodinase, iodothyronine, type I	13370	chr4	-	107.292	107.307	UNC040217933	chr4	106.897	104.91	109.216	7.49469	8.31661	6.2535	11.7489	cis
17428017	Zyg11a	zyg-11 family member A, cell cycle regulator	230590	chr4	-	108.182	108.218	UNC7947068	chr4	108.367	107.43	113.687	7.46675	8.34548	6.17728	10.9514	cis
17428032	Zyg11b	zyg-ll family member B, cell cycle regulator	414872	chr4	-	108.228	108.301	UNC7945971	chr4	108.273	107.43	108.781	7.56133	8.3408	6.19547	21.7899	cis
17428094	Zfyve9	zinc finger, FYVE domain containing 9	230597	chr4	-	108.638	108.781	UNC7942589	chr4	108.016	105.378	114.383	7.40887	8.34682	6.23905	8.53777	cis
17428186	Ttc39aos1	Ttc39a opposite strand RNA 1	102635290	chr4	-	109.404	109.406	UNC7957903	chr4	109.398	108.367	113.323	7.35327	8.68104	6.17824	31.0191	cis
17428209	9630013D21Rik	RIKEN cDNA 9630013D21 gene	319743	chr4	-	109.652	109.658	UNC7959494	chr4	109.574	109.08	109.981	7.63668	8.59731	6.23532	26.713	cis
17428457	Cyp4a14	cytochrome P450, family 4, subfamily a, polypeptide 14	13119	chr4	-	115.486	115.496	JAX00562601	chr4	114.893	108.943	127.575	7.51971	8.4282	6.24095	9.91359	cis
17428477	Cyp4b1	cytochrome P450, family 4, subfamily b, polypeptide 1	13120	chr4	-	115.625	115.648	UNC8055284	chr4	117.336	114.632	118.214	7.56476	8.43935	6.15434	12.1912	cis
17428509	Faah	fatty acid amide hydrolase	14073	chr4	-	115.998	116.018	UNC8051973	chr4	117.054	114.571	127.035	7.39333	8.29591	6.24996	8.63964	cis
17428645	Tmem69	transmembrane protein 69	230657	chr4	-	116.552	116.556	UNC8042424	chr4	116.167	114.632	117.626	7.55132	8.40227	6.17344	9.91737	cis
17428655	C530005A16Rik	RIKEN cDNA C530005A16 gene	654318	chr4	-	116.59	116.597	UNC8046482	chr4	116.61	107.479	117.649	7.42564	8.21501	6.19862	9.14126	cis
17428714	Toe1	target of EGR1, member 1 (nuclear)	68276	chr4	-	116.794	116.808	UNC8042424	chr4	116.167	114.641	117.231	7.39801	8.31446	6.15052	23.6226	cis
17428797	Snord38a	small nucleolar RNA, C/D box 38A	100217424	chr4	-	117.155	117.155	UNC8045482	chr4	116.508	114.893	117.231	7.54586	8.76251	6.26779	23.804	cis
17428946	Atp6v0b	ATPase, H+ transporting, lysosomal V0 subunit B	114143	chr4	-	117.884	117.887	UNC8064945	chr4	118.121	114.823	119.271	7.62206	8.7169	6.19799	11.5	cis
17428957	Dph2	DPH2 homolog	67728	chr4	-	117.889	117.892	UNC8065539	chr4	118.168	117.054	118.565	7.52353	8.18557	6.15603	15.7586	cis
17429206	Tie1	tyrosine kinase with immunoglobulin-like and EGF-like domains 1	21846	chr4	-	118.471	118.49	UNC040270067	chr4	121.342	108.367	126.172	7.54066	8.36843	6.22887	7.92776	cis
17429234	Tmem125	transmembrane protein 125	230678	chr4	-	118.541	118.544	UNC8075210	chr4	118.863	118.524	119.299	7.49791	8.062	6.23343	13.8874	cis
17429310	Zfp691	zinc finger protein 691	195522	chr4	-	119.17	119.174	UNC8076626	chr4	118.952	116.379	119.268	7.753	8.49712	6.2637	10.9437	cis
17429331	Tmem269	transmembrane protein 269	75180	chr4	-	119.204	119.218	UNC8080856	chr4	119.228	105.649	119.398	7.60014	8.56579	6.23675	13.2248	cis
17429341	AU022252	expressed sequence AU022252	230696	chr4	-	119.223	119.233	UNC8078901	chr4	119.1	118.573	119.299	7.49579	8.54752	6.23105	15.4701	cis
17429430	Frg2f1	FSHD region gene 2 family member 1	433752	chr4	-	119.53	119.539	UNC8085274	chr4	119.535	119.299	123.071	7.5882	8.41554	6.2232	38.6747	cis
17429521	Zfp69	zinc finger protein 69	381549	chr4	-	120.93	120.952	JAX00564025	chr4	121.007	120.747	121.083	7.35776	8.02295	6.17626	28.3189	cis
17429569	Rlf	rearranged L-myc fusion sequence	109263	chr4	-	121.145	121.215	UNC8129187	chr4	123.953	120.251	125.333	7.43965	8.07867	6.1467	7.75465	cis
17234494	S100b	S100 protein, beta polypeptide, neural	20203	chr10	+	76.2539	76.2609	UNC18255598	chr10	76.1483	75.645	78.4678	7.5934	8.42817	6.21351	10.2235	cis
17234588	Ftcd	formiminotransferase cyclodeaminase	14317	chr10	+	76.5757	76.5903	UNC18264922	chr10	76.8796	76.2415	78.1655	7.49932	8.36484	6.26643	9.06711	cis
17234667	Pttg1ip	pituitary tumor-transforming 1 interacting protein	108705	chr10	+	77.5817	77.5981	UNC18274086	chr10	77.57	76.8796	78.0557	7.50102	8.33949	6.19998	18.9678	cis
17429954	Sh3d21	SH3 domain containing 21	66938	chr4	-	126.151	126.163	UNC8148752	chr4	125.293	120.196	127.528	7.54913	8.59469	6.18504	12.2518	cis
17430052	Ago3	argonaute RISC catalytic subunit 3	214150	chr4	-	126.333	126.429	UNC8154525	chr4	125.631	123.78	126.705	7.49187	8.54642	6.18712	17.0469	cis
17430192	Zmym1	zinc finger, MYM domain containing 1	68310	chr4	-	127.047	127.061	UNC8200611	chr4	128.858	123.78	129.373	7.57319	8.38192	6.17632	10.5271	cis
17430222	Gjb4	gap junction protein, beta 4	14621	chr4	-	127.351	127.354	UNC8173960	chr4	127.182	126.96	127.528	7.4039	8.17764	6.2177	49.29	cis
17430270	Tlr12	toll-like receptor 12	384059	chr4	-	128.615	128.619	UNC8196606	chr4	128.594	128.512	128.949	7.50929	8.27656	6.2025	15.1414	cis
17430288	Azin2	antizyme inhibitor 2	242669	chr4	-	128.931	128.962	JAX00566089	chr4	128.984	127.867	129.373	7.42617	7.96992	6.19084	11.1655	cis
17430319	S100pbp	S100P binding protein	74648	chr4	-	129.148	129.19	JAX00566223	chr4	129.431	125.333	131.426	7.47677	8.55468	6.14772	11.0645	cis
17430430	Fam167b	family with sequence similarity 167, member B	230766	chr4	-	129.577	129.579	JAX00566223	chr4	129.431	129.309	130.793	7.49964	8.34505	6.17706	8.56301	cis
17430436	Eif3i	eukaryotic translation initiation factor 3, subunit I	54709	chr4	-	129.592	129.601	JAX00566223	chr4	129.431	128.566	132.728	7.54809	8.4788	6.22747	8.08992	cis
17430451	Dcdc2b	doublecortin domain containing 2b	100504491	chr4	-	129.609	129.614	UNC8208595	chr4	129.395	128.142	130.26	7.46403	8.26389	6.1672	9.09596	cis
17430521	Tmem39b	transmembrane protein 39b	230770	chr4	-	129.676	129.697	JAX00566223	chr4	129.431	128.823	131.171	7.52054	8.36475	6.23115	11.0008	cis
17430609	Serinc2	serine incorporator 2	230779	chr4	-	130.254	130.279	JAX00566397	chr4	130.176	130.093	131.453	7.48356	8.36973	6.13548	14.229	cis
17430809	Rcc1	regulator of chromosome condensation 1	100088	chr4	-	132.332	132.346	UNC8235143	chr4	131.457	131.451	134.187	7.52152	8.6338	6.19713	12.4443	cis
17430824	Snhg3	small nucleolar RNA host gene 3	399101	chr4	-	132.352	132.354	UNC8241261	chr4	132.081	127.528	136.842	7.5778	8.24715	6.22658	8.08053	cis
17430878	Atpif1	ATPase inhibitory factor 1	11983	chr4	-	132.531	132.534	UNC8217501	chr4	130.093	129.347	134.634	7.59485	8.42376	6.23646	7.79522	cis
17430894	Smpdl3b	sphingomyelin phosphodiesterase, acid-like 3B	100340	chr4	-	132.733	132.757	UNC8241674	chr4	132.116	131.451	135.693	7.40056	8.35485	6.24469	8.83093	cis
17430930	Stx12	syntaxin 12	100226	chr4	-	132.854	132.884	UNC8249361	chr4	132.875	132.138	132.955	7.52328	8.49499	6.20171	14.7256	cis
17430968	Sytl1	synaptotagmin-like 1	269589	chr4	-	133.253	133.263	JAX00567030	chr4	132.998	132.944	133.855	7.53498	8.36083	6.24306	53.6216	cis
17430989	Tmem222	transmembrane protein 222	52174	chr4	-	133.266	133.278	JAX00124869	chr4	133.879	132.889	137.174	7.4116	8.57342	6.19491	7.62543	cis
17430997	Wdtc1	WD and tetratricopeptide repeats 1	230796	chr4	-	133.294	133.353	UNC040296531	chr4	133.051	132.944	133.855	7.59086	8.31872	6.21034	27.6415	cis
17431036	Nudc	nudC nuclear distribution protein	18221	chr4	-	133.533	133.546	JAX00124909	chr4	134.423	132.889	134.634	7.4791	8.28702	6.26882	8.2404	cis
17431053	Zdhhc18	zinc finger, DHHC domain containing 18	503610	chr4	-	133.605	133.65	JAX00567030	chr4	132.998	132.955	133.855	7.49183	8.44897	6.21593	36.8968	cis
17431065	Pigv	phosphatidylinositol glycan anchor biosynthesis, class V	230801	chr4	-	133.661	133.673	JAX00567416	chr4	134.467	132.893	134.634	7.40825	8.35121	6.15517	11.3864	cis
17431187	Cep85	centrosomal protein 85	70012	chr4	-	134.13	134.187	UNC8259693	chr4	133.734	132.937	134.543	7.47599	8.303	6.21463	33.1932	cis
17431259	Zfp593	zinc finger protein 593	68040	chr4	-	134.244	134.246	JAX00124909	chr4	134.423	132.955	134.739	7.45135	8.28901	6.19098	9.26769	cis
17431302	Mtfr1l	mitochondrial fission regulator 1-like	76824	chr4	-	134.526	134.535	UNC8270994	chr4	134.582	134.467	134.772	7.40135	8.07227	6.22452	14.3548	cis
17431350	Ldlrap1	low density lipoprotein receptor adaptor protein 1	100017	chr4	-	134.745	134.759	UNC8274786	chr4	134.825	134.582	134.977	7.38427	8.23368	6.18139	14.6741	cis
17431429	Ncmap	noncompact myelin associated protein	230822	chr4	-	135.37	135.398	UNC8283899	chr4	135.385	135.15	135.646	7.53674	8.47998	6.19747	17.995	cis
17431440	Rcan3	regulator of calcineurin 3	53902	chr4	-	135.412	135.434	JAX00124989	chr4	135.481	134.582	136.369	7.50903	8.45214	6.18625	10.9043	cis
17431454	Nipal3	NIPA-like domain containing 3	74552	chr4	-	135.446	135.495	UNC8288138	chr4	135.646	135.314	135.942	7.39956	8.53127	6.1944	23.6703	cis
17431496	Pnrc2	proline-rich nuclear receptor coactivator 2	52830	chr4	-	135.872	135.874	UNC8288856	chr4	135.693	135.15	136.122	7.69018	8.62045	6.2437	17.3943	cis
17431546	Rpl11	ribosomal protein L11	67025	chr4	-	136.028	136.053	UNC040591961	chr4	138.447	135.942	138.654	7.5281	8.1622	6.25521	8.14469	cis
17431588	Ephb2	Eph receptor B2	13844	chr4	-	136.654	136.775	backupUNC040580735	chr4	137.244	135.942	137.619	7.34447	8.22699	6.22117	7.39202	cis
17431642	Zbtb40	zinc finger and BTB domain containing 40	230848	chr4	-	136.98	137.049	UNC8308840	chr4	137.081	57.2742	138.323	7.46169	8.28624	6.19471	7.51399	cis
17431720	Alpl	alkaline phosphatase, liver/bone/kidney	11647	chr4	-	137.742	137.796	UNC8308110	chr4	137.039	136.805	138.197	7.52645	8.75419	6.19246	11.5694	cis
17431749	Pink1	PTEN induced putative kinase 1	68943	chr4	-	138.313	138.326	UNC8326311	chr4	138.323	137.091	140.385	7.59124	8.41904	6.22299	9.82908	cis
17431761	Cda	cytidine deaminase	72269	chr4	-	138.339	138.368	UNC8316283	chr4	137.65	135.942	139.365	7.40532	8.03075	6.16232	8.05408	cis
17431820	Pla2g5	phospholipase A2, group V	18784	chr4	-	138.799	138.863	UNC8335888	chr4	138.962	138.618	140.013	7.61444	8.52987	6.26359	10.4565	cis
17431841	Otud3	OTU domain containing 3	73162	chr4	-	138.895	138.914	UNC8335888	chr4	138.962	138.85	139.804	7.46719	8.11795	6.22186	19.6708	cis
17431867	Minos1	mitochondrial inner membrane organizing system 1	433771	chr4	-	139.102	139.131	UNC8347024	chr4	139.865	138.68	139.985	7.4635	8.19224	6.18871	20.0838	cis
17431880	Pqlc2	PQ loop repeat containing 2	212555	chr4	-	139.299	139.308	UNC8339494	chr4	139.286	138.924	142.119	7.42666	8.60192	6.22702	7.79106	cis
17431895	Mrto4	mRNA turnover 4, ribosome maturation factor	69902	chr4	-	139.347	139.353	UNC8340774	chr4	139.379	136.369	142.424	7.61022	8.4056	6.22712	8.2079	cis
17431955	Arhgef10l	Rho guanine nucleotide exchange factor (GEF) 10-like	72754	chr4	-	140.515	140.666	UNC8360174	chr4	140.625	139.286	141.874	7.49597	8.24899	6.19677	7.6474	cis
17432247	Tmem82	transmembrane protein 82	213989	chr4	-	141.614	141.618	UNC8375574	chr4	141.602	140.925	142.096	7.50197	8.26831	6.24304	18.509	cis
17432256	Slc25a34	solute carrier family 25, member 34	384071	chr4	-	141.619	141.624	UNC8359549	chr4	140.593	140.25	142.087	7.42574	8.29494	6.23343	9.82834	cis
17432320	Cela2a	chymotrypsin-like elastase family, member 2A	13706	chr4	-	141.818	141.826	UNC8380344	chr4	141.964	140.679	142.119	7.5115	8.22816	6.20898	17.1811	cis
17432387	Tmem51	transmembrane protein 51	214359	chr4	-	142.031	142.084	UNC8383913	chr4	142.373	142.05	142.902	7.51699	8.28512	6.18841	18.1227	cis
17432745	4933438K21Rik	RIKEN cDNA 4933438K21 gene	71270	chr4	-	147.063	147.064	UNC8415785	chr4	147.841	145.237	148.1	7.70247	8.59412	6.2627	24.6647	cis
17432749	Zfp979	zinc finger protein 979	112422	chr4	-	147.612	147.641	UNC8413757	chr4	145.361	144.559	148.128	7.53583	8.24746	6.1788	30.5502	cis
17432770	Zfp984	zinc finger protein 984	100041677	chr4	-	147.755	147.796	JAX00570026	chr4	147.919	145.218	148.166	7.49647	8.29752	6.19392	29.5604	cis
17432790	Miip	migration and invasion inhibitory protein	28010	chr4	-	147.861	147.869	UNC8419016	chr4	148.1	145.301	148.166	7.43127	8.32184	6.20089	12.5947	cis
17432835	Plod1	procollagen-lysine, 2-oxoglutarate 5-dioxygenase 1	18822	chr4	-	147.91	147.937	UNC8417694	chr4	148.004	145.218	148.166	7.63636	8.453	6.23734	25.492	cis
17432865	Clcn6	chloride channel, voltage-sensitive 6	26372	chr4	-	148.004	148.029	UNC8417318	chr4	147.969	143.608	150.063	7.33096	8.0931	6.21299	11.0467	cis
17432927	Fbxo44	F-box protein 44	230903	chr4	-	148.153	148.16	JAX00570086	chr4	148.104	145.383	148.193	7.44395	8.40249	6.19028	38.0263	cis
17432967	Ubiad1	UbiA prenyltransferase domain containing 1	71707	chr4	-	148.435	148.445	JAX00570143	chr4	148.279	148.128	149.18	7.49219	8.52215	6.20426	46.0107	cis
17432976	Angptl7	angiopoietin-like 7	654812	chr4	-	148.495	148.5	UNC8421128	chr4	148.238	142.962	149.94	7.53517	8.15809	6.29805	9.36245	cis
17433023	Cort	cortistatin	12854	chr4	-	149.125	149.127	UNC8427443	chr4	148.712	148.104	149.647	7.5256	8.63182	6.21641	10.7515	cis
17433029	Cenps	centromere protein S	69928	chr4	-	149.128	149.138	UNC8420620	chr4	148.214	148.128	149.906	7.53368	8.24725	6.17123	36.7972	cis
17433151	Nmnat1	nicotinamide nucleotide adenylyltransferase 1	66454	chr4	-	149.468	149.485	JAX00125975	chr4	149.85	148.128	149.919	7.55656	8.50639	6.19062	13.3813	cis
17433221	Slc25a33	solute carrier family 25, member 33	70556	chr4	-	149.744	149.774	UNC8441220	chr4	149.905	149.433	151.986	7.36973	8.47598	6.16674	8.5945	cis
17433265	Car6	carbonic anhydrase 6	12353	chr4	-	150.187	150.201	UNC8460072	chr4	151.166	151.134	151.258	7.6657	8.36193	6.24805	48.5628	cis
17433412	Zbtb48	zinc finger and BTB domain containing 48	100090	chr4	-	152.02	152.027	UNC8484143	chr4	152.698	151.945	152.76	7.43038	8.20103	6.22204	26.4092	cis
17433602	Tprgl	transformation related protein 63 regulated like	67808	chr4	-	154.158	154.161	UNC8510731	chr4	154.27	154.054	154.624	7.47947	8.29742	6.19901	10.5914	cis
17433610	Arhgef16	Rho guanine nucleotide exchange factor (GEF) 16	230972	chr4	-	154.279	154.302	UNC8510805	chr4	154.276	154.026	154.327	7.44189	8.26046	6.22625	18.6121	cis
17433672	Fam213b	family with sequence similarity 213, member B	66469	chr4	-	154.896	154.899	UNC8520308	chr4	154.924	154.912	154.941	7.48755	8.40611	6.2193	45.6073	cis
17433683	Tnfrsf14	tumor necrosis factor receptor superfamily, member 14 (herpesvirus entry mediator)	230979	chr4	-	154.922	154.929	UNC8520785	chr4	154.961	154.912	155.184	7.43383	8.5004	6.14792	30.1511	cis
17433731	Rer1	retention in endoplasmic reticulum sorting receptor 1	67830	chr4	-	155.074	155.083	UNC040466207	chr4	155.03	154.372	155.595	7.43012	8.37418	6.14742	7.61324	cis
17433755	Prkcz	protein kinase C, zeta	18762	chr4	-	155.268	155.361	UNC8527454	chr4	155.456	155.206	155.825	7.47795	8.27891	6.17571	23.4584	cis
17433787	Gabrd	gamma-aminobutyric acid (GABA) A receptor, subunit delta	14403	chr4	-	155.385	155.398	JAX00572019	chr4	155.231	155.146	155.493	7.48861	8.32148	6.22859	26.1706	cis
17433810	Gm16023	predicted gene 16023	100502734	chr4	-	155.609	155.625	UNC8528966	chr4	155.56	155.22	155.759	7.43257	8.36667	6.23421	23.6896	cis
17433860	Atad3a	ATPase family, AAA domain containing 3A	108888	chr4	-	155.741	155.761	UNC8531158	chr4	155.717	155.456	155.938	7.4304	8.39651	6.20502	14.8708	cis
17433909	Cptp	ceramide-1-phosphate transfer protein	79554	chr4	-	155.865	155.869	UNC8534409	chr4	155.938	155.868	155.959	7.54672	8.60918	6.17185	35.9873	cis
17433920	Pusl1	pseudouridylate synthase-like 1	433813	chr4	-	155.888	155.892	UNC8532823	chr4	155.825	155.779	155.938	7.38001	8.1643	6.20448	53.3323	cis
17434046	Klhl17	kelch-like 17	231003	chr4	-	156.229	156.235	UNC8539401	chr4	156.255	156.001	156.255	7.54034	8.20436	6.24065	14.2142	cis
17234814	Ilvbl	ilvB (bacterial acetolactate synthase)-like	216136	chr10	+	78.5745	78.5844	UNC18285714	chr10	78.5141	78.2114	79.7466	7.47786	8.62928	6.18307	37.0064	cis
17434324	1700109H08Rik	RIKEN cDNA 1700109H08 gene	77036	chr5	+	3.57167	3.58434	JAX00572282	chr5	3.60948	3.16008	8.68897	7.50807	8.59375	6.16	8.28128	cis
17434381	Krit1	KRIT1, ankyrin repeat containing	79264	chr5	+	3.80328	3.84428	UNC8547992	chr5	4.11027	3.16008	8.13563	7.46411	8.29985	6.22134	7.56582	cis
17434524	Abcb1a	ATP-binding cassette, sub-family B (MDR/TAP), member 1A	18671	chr5	+	8.66012	8.74823	backupUNC050316601	chr5	4.96735	3.16008	13.4732	7.33452	8.16876	6.1685	9.26976	cis
17434555	Abcb1b	ATP-binding cassette, sub-family B (MDR/TAP), member 1B	18669	chr5	+	8.79825	8.86607	UNC8609831	chr5	8.79552	8.42206	9.0408	7.31475	8.23158	6.13792	45.6172	cis
17434614	Tmem243	transmembrane protein 243, mitochondrial	652925	chr5	+	9.10125	9.11875	UNC8635788	chr5	10.7579	5.29665	14.224	7.49776	8.46763	6.19319	11.4819	cis
17434623	9330182L06Rik	RIKEN cDNA 9330182L06 gene	231014	chr5	+	9.26616	9.48014	JAX00573630	chr5	9.48334	8.79552	12.5804	7.66798	8.60465	6.19936	12.1264	cis
17434833	Pclo	piccolo (presynaptic cytomatrix protein)	26875	chr5	+	14.5154	14.8616	UNC8683868	chr5	14.8634	13.828	15.7716	7.59316	8.32407	6.25762	27.8703	cis
17435048	Tmem60	transmembrane protein 60	212090	chr5	+	20.8822	20.8869	UNC8758248	chr5	20.6986	17.7559	22.3239	7.43237	8.62564	6.17067	17.6623	cis
17435055	Gsap	gamma-secretase activating protein	212167	chr5	+	21.1863	21.2908	UNC8768411	chr5	21.4675	21.0175	21.4993	7.46779	8.42184	6.19446	25.4509	cis
17435116	Armc10	armadillo repeat containing 10	67211	chr5	+	21.6459	21.6621	JAX00575745	chr5	21.7161	21.4908	23.353	7.45106	8.54641	6.15879	18.377	cis
17435130	Pmpcb	peptidase (mitochondrial processing) beta	73078	chr5	+	21.7372	21.7571	JAX00575895	chr5	22.1747	21.4908	22.4795	7.3787	8.33261	6.19881	37.0544	cis
17435170	6030443J06Rik	RIKEN cDNA 6030443J06 gene	320719	chr5	+	22.5538	22.8078	UNC050061348	chr5	24.1084	21.681	27.1078	7.423	8.26777	6.22128	11.7405	cis
17435221	Rint1	RAD50 interactor 1	72772	chr5	+	23.7878	23.82	UNC8801059	chr5	23.7373	23.1793	24.4229	7.43012	8.19127	6.18046	42.2041	cis
17435251	Klhl7	kelch-like 7	52323	chr5	+	24.1006	24.1599	JAX00576232	chr5	23.5775	21.4908	24.6821	7.52681	8.41462	6.2014	12.6571	cis
17435282	Nos3	nitric oxide synthase 3, endothelial cell	18127	chr5	+	24.3649	24.384	UNC8812264	chr5	24.4229	22.1747	24.6821	7.46897	8.04334	6.22542	24.0327	cis
17435348	Slc4a2	solute carrier family 4 (anion exchanger), member 2	20535	chr5	+	24.4239	24.4405	UNC8799164	chr5	23.5867	21.4908	25.004	7.68331	8.27477	6.21689	9.59706	cis
17435380	Agap3	ArfGAP with GTPase domain, ankyrin repeat and PH domain 3	213990	chr5	+	24.4525	24.5018	UNC050064364	chr5	24.6821	22.9724	141.754	7.45142	8.12685	6.28409	7.85258	cis
17435474	Galnt11	polypeptide N-acetylgalactosaminyltransferase 11	231050	chr5	+	25.2464	25.2655	UNC8824747	chr5	25.3424	25.0488	26.3044	7.29109	8.31326	6.18005	27.6692	cis
17435503	1700096K18Rik	RIKEN cDNA 1700096K18 gene	73571	chr5	+	25.53	25.5314	UNC8857841	chr5	27.7023	25.0488	30.5606	7.54813	8.46274	6.24145	8.11657	cis
17435674	Ube3c	ubiquitin protein ligase E3C	100763	chr5	+	29.5692	29.6749	UNC8884202	chr5	29.9625	29.0005	31.9312	7.5819	8.27861	6.23497	11.8422	cis
17435786	Drc1	dynein regulatory complex subunit 1	381738	chr5	+	30.2814	30.3666	UNC8887771	chr5	30.3599	29.0005	31.369	7.34185	8.21298	6.20507	19.5872	cis
17435946	Abhd1	abhydrolase domain containing 1	57742	chr5	+	30.9502	30.9551	UNC8897248	chr5	31.063	30.7748	31.369	7.70258	8.72309	6.27522	69.9122	cis
17435963	Atraid	all-trans retinoic acid induced differentiation factor	381629	chr5	+	31.0484	31.0546	JAX00577825	chr5	31.0062	30.2528	31.9312	7.57329	8.74316	6.21703	18.4777	cis
17436107	Gckr	glucokinase regulatory protein	231103	chr5	+	31.2976	31.3272	UNC8886833	chr5	30.2528	25.2566	31.9312	7.51258	8.87021	6.21479	11.716	cis
17436151	Gpn1	GPN-loop GTPase 1	74254	chr5	+	31.4948	31.5119	UNC8908479	chr5	32.0956	30.436	32.1146	7.40709	8.36725	6.16928	14.5191	cis
17436171	Slc4a1ap	solute carrier family 4 (anion exchanger), member 1, adaptor protein	20534	chr5	+	31.527	31.5539	UNC8906005	chr5	31.8655	30.2528	32.1146	7.50046	8.41118	6.19008	13.2108	cis
17436192	Gm38424	predicted gene, 38424	100503002	chr5	+	31.5969	31.6631	UNC8897625	chr5	31.0986	30.2217	32.1146	7.46582	8.34069	6.13962	12.9503	cis
17436210	Babam2	BRISC and BRCA1 A complex member 2	107976	chr5	+	31.6977	32.0849	UNC8906684	chr5	31.9312	31.8655	32.0956	7.33838	8.0827	6.15007	29.7115	cis
17436315	Ppp1cb	protein phosphatase 1, catalytic subunit, beta isoform	19046	chr5	+	32.4592	32.4954	UNC8934093	chr5	34.569	32.3931	35.9336	7.51089	8.43247	6.24172	7.68717	cis
17436407	Slc5a1	solute carrier family 5 (sodium/glucose cotransporter), member 1	20537	chr5	+	33.1042	33.1628	UNC8919184	chr5	33.1013	32.3931	35.7285	7.36196	8.37907	6.16716	19.4366	cis
17436427	Maea	macrophage erythroblast attacher	59003	chr5	+	33.3356	33.3729	backupUNC050329217	chr5	35.6587	32.1146	35.9841	7.37811	8.19008	6.17904	7.45632	cis
17436481	Fgfr3	fibroblast growth factor receptor 3	14184	chr5	+	33.7223	33.7364	JAX00128667	chr5	34.0774	32.3931	35.307	7.4767	8.57138	6.15364	10.9381	cis
17436607	Sh3bp2	SH3-domain binding protein 2	24055	chr5	+	34.5258	34.5632	JAX00128648	chr5	33.8256	32.3931	35.1981	7.46524	8.22792	6.17254	29.1619	cis
17436683	Htt	huntingtin	15194	chr5	+	34.7619	34.9108	UNC8919184	chr5	33.1013	32.3931	39.2411	7.45393	8.48212	6.21051	7.97824	cis
17436839	Acox3	acyl-Coenzyme A oxidase 3, pristanoyl	80911	chr5	+	35.5831	35.6145	UNC8918424	chr5	33.044	32.3931	37.1035	7.4713	8.2099	6.15072	22.9901	cis
17436907	Afap1	actin filament associated protein 1	70292	chr5	+	35.8934	36.0029	backupUNC050083156	chr5	32.4152	32.3731	37.1035	7.42022	8.28781	6.1756	16.5421	cis
17235053	Wdr18	WD repeat domain 18	216156	chr10	+	79.9602	79.9692	JAX00293893	chr10	81.5129	76.8135	83.0472	7.41327	8.2632	6.21351	8.96641	cis
17437019	Evc2	EvC ciliary complex subunit 2	68525	chr5	+	37.3385	37.4249	JAX00579207	chr5	37.2209	37.1035	37.4639	7.52645	8.34012	6.14664	17.8345	cis
17437087	Tmem128	transmembrane protein 128	66309	chr5	+	38.2603	38.2694	UNC8987463	chr5	38.2178	37.4472	38.3432	7.47394	8.26354	6.1783	36.949	cis
17437198	Bst1	bone marrow stromal cell antigen 1	12182	chr5	+	43.8189	43.8428	UNC9062929	chr5	43.8669	41.9203	44.7145	7.4248	8.37581	6.11776	10.7471	cis
17437213	Cd38	CD38 antigen	12494	chr5	+	43.8688	43.9117	UNC9064193	chr5	43.9399	40.8149	45.5055	7.46619	8.22796	6.19046	13.2696	cis
17437247	Lap3	leucine aminopeptidase 3	66988	chr5	+	45.4934	45.5121	UNC9087042	chr5	45.5055	45.3793	46.2069	7.53169	8.40975	6.21739	31.7962	cis
17437272	9630001P10Rik	RIKEN cDNA 9630001P10 gene	319251	chr5	+	45.6387	45.6451	UNC9086145	chr5	45.4592	44.7602	50.7394	7.47388	8.3614	6.22509	8.88968	cis
17437278	Ncapg	non-SMC condensin I complex, subunit G	54392	chr5	+	45.67	45.7002	UNC9091456	chr5	45.8716	45.3793	47.3327	7.5123	8.32015	6.19177	55.0042	cis
17437355	Pacrgl	PARK2 co-regulated-like	66768	chr5	+	48.3744	48.3884	JAX00581019	chr5	46.4113	45.3793	49.5972	7.42019	8.04714	6.2069	9.71585	cis
17437366	5730480H06Rik	RIKEN cDNA 5730480H06 gene	70592	chr5	+	48.3956	48.4142	UNC9129632	chr5	48.556	45.3793	49.2343	7.69462	8.26918	6.22984	19.7366	cis
17437380	9230114K14Rik	RIKEN cDNA 9230114K14 gene	414108	chr5	+	52.1907	52.1976	UNC9175326	chr5	51.6974	51.627	52.2956	7.43894	8.3902	6.17855	30.4997	cis
17437390	Pi4k2b	phosphatidylinositol 4-kinase type 2 beta	67073	chr5	+	52.7417	52.7691	UNC9167516	chr5	51.1048	50.4748	52.8169	7.54187	8.26921	6.21807	14.0644	cis
17437459	Slc34a2	solute carrier family 34 (sodium phosphate), member 2	20531	chr5	+	53.0381	53.0713	UNC9190644	chr5	52.8169	52.2948	53.0579	7.24521	7.99729	6.14906	31.2395	cis
17437558	Pcdh7	protocadherin 7	54216	chr5	+	57.7182	58.1322	JAX00583445	chr5	57.9622	57.6143	64.4403	7.56586	8.21957	6.18211	10.6766	cis
17437686	Fam114a1	family with sequence similarity 114, member A1	68303	chr5	+	64.9797	65.0418	UNC9348157	chr5	65.0461	64.1542	73.8708	7.47152	8.23057	6.13024	11.423	cis
17437704	Klhl5	kelch-like 5	71778	chr5	+	65.1076	65.1682	UNC9349953	chr5	65.1685	64.4308	66.5193	7.47406	8.56712	6.22	10.8473	cis
17437773	Lias	lipoic acid synthetase	79464	chr5	+	65.3915	65.41	UNC9367502	chr5	66.5	52.9431	71.1476	7.43065	8.33101	6.25348	9.04122	cis
17437857	Nsun7	NOL1/NOP2/Sun domain family, member 7	70918	chr5	+	66.2601	66.298	JAX00584770	chr5	66.0349	65.0461	66.5	7.50675	8.41864	6.22989	19.8085	cis
17437887	Limch1	LIM and calponin homology domains 1	77569	chr5	+	66.7459	67.0559	UNC9380790	chr5	67.3557	66.5117	69.0022	7.59015	8.72717	6.24696	13.965	cis
17437937	Slc30a9	solute carrier family 30 (zinc transporter), member 9	109108	chr5	+	67.3071	67.358	JAX00585036	chr5	67.4157	64.9022	68.9278	7.39596	8.56912	6.16317	12.0607	cis
17437998	Guf1	GUF1 homolog, GTPase	231279	chr5	+	69.5569	69.5728	JAX00585409	chr5	70.674	67.6002	71.9096	7.46604	8.50024	6.19071	18.9067	cis
17438035	Atp10d	ATPase, class V, type 10D	231287	chr5	+	72.2035	72.2982	UNC9440121	chr5	72.2247	71.2371	73.3627	7.44546	8.2981	6.16523	25.0443	cis
17438062	Nipal1	NIPA-like domain containing 1	70701	chr5	+	72.6478	72.6703	UNC9438003	chr5	72.0562	71.8693	74.0202	7.38771	8.16968	6.15918	10.8587	cis
17438101	Ociad1	OCIA domain containing 1	68095	chr5	+	73.2928	73.3139	JAX00585778	chr5	73.4131	72.5418	74.0202	7.40105	8.32407	6.17879	18.064	cis
17438189	Rasl11b	RAS-like, family 11, member B	68939	chr5	+	74.1955	74.1992	UNC9477678	chr5	74.8834	71.8693	81.1254	7.47975	8.31742	6.20595	9.36236	cis
17438272	Kit	KIT proto-oncogene receptor tyrosine kinase	16590	chr5	+	75.575	75.6566	UNC9481281	chr5	75.1741	75.0427	76.6771	7.44531	8.37213	6.20642	16.0665	cis
17438301	Srd5a3	steroid 5 alpha-reductase 3	57357	chr5	+	76.1403	76.155	UNC9498249	chr5	76.3505	75.0427	76.6475	7.30336	8.25728	6.18328	15.5153	cis
17438361	Cep135	centrosomal protein 135	381644	chr5	+	76.5888	76.6462	UNC9500814	chr5	76.5033	74.0202	77.2685	7.54926	8.6749	6.26369	8.46235	cis
17438423	Paics	phosphoribosylaminoimidazole carboxylase, phosphoribosylaminoribosylaminoimidazole, succinocarboxamide synthetase	67054	chr5	+	76.9513	76.9671	JAX00131867	chr5	76.7834	76.6475	80.1624	7.41442	8.32331	6.19531	13.5576	cis
17438496	Polr2b	polymerase (RNA) II (DNA directed) polypeptide B	231329	chr5	+	77.3103	77.3492	UNC9540115	chr5	79.3291	76.6475	80.9153	7.60831	8.25871	6.23937	13.4326	cis
17438530	Adgrl3	adhesion G protein-coupled receptor L3	319387	chr5	+	81.0213	81.825	backupUNC051680672	chr5	81.0888	76.6308	81.8204	7.58222	8.7381	6.22545	10.9192	cis
17438814	Mob1b	MOB kinase activator 1B	68473	chr5	+	88.7209	88.7611	UNC9663875	chr5	90.0286	86.1128	90.7155	7.502	8.33036	6.20046	13.5886	cis
17438823	Dck	deoxycytidine kinase	13178	chr5	+	88.765	88.7823	backupUNC050138498	chr5	88.1414	86.0589	89.5211	7.43028	8.12775	6.20704	10.5114	cis
17438920	Afm	afamin	280662	chr5	+	90.519	90.5535	UNC9662778	chr5	89.9289	85.608	91.7976	7.53639	8.412	6.21749	11.4794	cis
17438940	5830473C10Rik	RIKEN cDNA 5830473C10 gene	622307	chr5	+	90.5612	90.5978	UNC9669480	chr5	90.5235	85.608	91.7976	7.63862	8.66762	6.20086	13.3469	cis
17439045	Thap6	THAP domain containing 6	381650	chr5	+	91.9629	91.9718	UNC9691273	chr5	92.0229	91.9246	92.4582	7.50739	8.53084	6.2183	26.5818	cis
17439116	Fam47e	family with sequence similarity 47, member E	384198	chr5	+	92.5551	92.5912	UNC9702636	chr5	92.8353	91.7747	95.9521	7.48274	8.14956	6.22794	17.8779	cis
17439131	Stbd1	starch binding domain 1	52331	chr5	+	92.6031	92.6062	JAX00588844	chr5	92.8388	90.0596	96.6635	7.47448	8.66398	6.19443	8.58753	cis
17439184	Ccng2	cyclin G2	12452	chr5	+	93.2675	93.2759	UNC9718843	chr5	96.5216	91.8674	96.8328	7.37353	8.2628	6.14277	10.6711	cis
17235268	Ndufs7	NADH dehydrogenase (ubiquinone) Fe-S protein 7	75406	chr10	+	80.2491	80.2568	UNC18300865	chr10	80.5081	75.8428	80.9418	7.34204	8.30495	6.17379	9.89472	cis
17235368	Scamp4	secretory carrier membrane protein 4	56214	chr10	+	80.6029	80.6156	JAX00293964	chr10	82.3797	79.7856	83.0334	7.54953	8.51798	6.17322	8.39429	cis
17235399	Izumo4	IZUMO family member 4	71564	chr10	+	80.7027	80.7054	UNC18280208	chr10	78.0633	73.902	92.7154	7.22058	8.08837	6.11667	8.91431	cis
17439481	Bmp2k	BMP2 inducible kinase	140780	chr5	+	96.9979	97.0915	UNC9726016	chr5	96.8999	96.5216	99.0644	7.36079	8.26497	6.19968	9.75405	cis
17439585	2310034O05Rik	RIKEN cDNA 2310034O05 gene	69571	chr5	+	100.211	100.218	UNC9766871	chr5	99.7455	99.5348	101.757	7.62928	8.64831	6.24126	14.2713	cis
17439622	Gpat3	glycerol-3-phosphate acyltransferase 3	231510	chr5	+	100.846	100.898	UNC9786321	chr5	101.128	100.545	103.106	7.45842	8.47959	6.22097	15.8071	cis
17439669	Arhgap24	Rho GTPase activating protein 24	231532	chr5	+	102.481	102.898	UNC9804968	chr5	102.318	101.071	103.106	7.61445	8.32626	6.21328	9.76223	cis
17439741	Aff1	AF4/FMR2 family, member 1	17355	chr5	+	103.754	103.852	UNC9819327	chr5	103.158	100.545	104.863	7.4891	8.59268	6.17894	17.996	cis
17439769	Nudt9	nudix (nucleoside diphosphate linked moiety X)-type motif 9	74167	chr5	+	104.046	104.065	UNC9828346	chr5	103.765	102.756	128.929	7.51664	8.71644	6.19182	8.62402	cis
17439842	Pkd2	polycystic kidney disease 2	18764	chr5	+	104.459	104.505	UNC9844922	chr5	104.863	104.085	104.969	7.43947	8.35556	6.2163	44.558	cis
17439861	BC005561	cDNA sequence BC005561	100042165	chr5	+	104.508	104.522	UNC9845291	chr5	104.93	103.989	105.639	7.46211	8.47447	6.19263	23.8402	cis
17439865	D930016D06Rik	RIKEN cDNA D930016D06 gene	100662	chr5	+	104.526	104.554	UNC9836016	chr5	104.242	103.338	106.377	7.50825	8.31684	6.23301	15.2682	cis
17440042	Btbd8	BTB (POZ) domain containing 8	100503185	chr5	+	107.446	107.492	JAX00591166	chr5	106.795	102.713	112.755	7.531	8.46192	6.24039	9.32382	cis
17440054	A830010M20Rik	RIKEN cDNA A830010M20 gene	231570	chr5	+	107.496	107.512	UNC9877912	chr5	107.911	106.428	112.776	7.45165	8.29875	6.16591	8.00897	cis
17440113	Ube2d2b	ubiquitin-conjugating enzyme E2D 2B	73318	chr5	+	107.83	107.831	UNC9880190	chr5	108.127	104.041	112.742	7.44786	8.26433	6.1667	8.61719	cis
17440194	Dr1	down-regulator of transcription 1	13486	chr5	+	108.269	108.28	UNC9875167	chr5	107.611	105.965	119.293	7.63548	8.63033	6.17708	9.22082	cis
17440201	Pigg	phosphatidylinositol glycan anchor biosynthesis, class G	433931	chr5	+	108.313	108.349	UNC9879551	chr5	108.065	107.073	110.604	7.29957	8.14859	6.19508	14.2826	cis
17440293	Idua	iduronidase, alpha-L-	15932	chr5	+	108.66	108.684	UNC9886049	chr5	108.693	107.073	112.231	7.40756	8.28939	6.221	18.7847	cis
17440342	Gm15446	predicted gene 15446	100642166	chr5	+	109.923	109.942	UNC9896361	chr5	110.008	107.798	110.503	7.32987	7.92988	6.14633	15.9721	cis
17440377	Zfp605	zinc finger protein 605	675812	chr5	+	110.11	110.132	UNC9900979	chr5	110.428	108.317	110.604	7.27808	8.13305	6.11789	29.4247	cis
17440387	Chfr	checkpoint with forkhead and ring finger domains	231600	chr5	+	110.136	110.172	UNC9882721	chr5	108.389	107.798	118.438	7.65056	8.38968	6.23395	12.1507	cis
17440439	Ankle2	ankyrin repeat and LEM domain containing 2	71782	chr5	+	110.231	110.256	UNC9899437	chr5	110.288	106.428	110.604	7.55557	8.45117	6.22071	14.0444	cis
17440553	Ddx51	DEAD (Asp-Glu-Ala-Asp) box polypeptide 51	69663	chr5	+	110.653	110.659	JAX00134247	chr5	110.613	110.503	114.27	7.44713	8.24694	6.17961	13.8558	cis
17440575	Chek2	checkpoint kinase 2	50883	chr5	+	110.841	110.874	UNC9901950	chr5	110.503	110.101	115.532	7.34416	8.33927	6.216	13.142	cis
17440620	Pitpnb	phosphatidylinositol transfer protein, beta	56305	chr5	+	111.335	111.388	UNC9901950	chr5	110.503	105.594	112.767	7.3799	8.45491	6.1729	13.1167	cis
17440633	Mn1	meningioma 1	433938	chr5	+	111.417	111.457	JAX00591932	chr5	110.426	108.53	112.561	7.40757	8.1944	6.18368	13.3458	cis
17440675	Tfip11	tuftelin interacting protein 11	54723	chr5	+	112.326	112.338	UNC9900979	chr5	110.428	106.428	113.354	7.47205	8.44055	6.15442	7.8688	cis
17440923	Ube3b	ubiquitin protein ligase E3B	117146	chr5	+	114.381	114.42	UNC050411126	chr5	113.847	112.767	114.543	7.54025	8.33091	6.20438	21.7425	cis
17440998	Ankrd13a	ankyrin repeat domain 13a	68420	chr5	+	114.775	114.806	UNC9963550	chr5	115.067	108.596	115.359	7.59122	8.57809	6.23112	9.45156	cis
17441063	2210016L21Rik	RIKEN cDNA 2210016L21 gene	72357	chr5	+	114.942	114.949	UNC9964245	chr5	115.161	114.378	115.532	7.6013	8.42562	6.21491	13.931	cis
17441072	Hnf1aos1	HNF1 homeobox A, opposite strand 1	102638537	chr5	+	114.969	114.998	UNC9962252	chr5	114.938	114.543	115.568	7.35828	8.19546	6.17496	22.2341	cis
17441097	Pop5	processing of precursor 5, ribonuclease P/MRP family (S. cerevisiae)	117109	chr5	+	115.236	115.241	UNC9964998	chr5	115.219	114.938	115.532	7.45659	8.37749	6.18946	32.7648	cis
17441105	Coq5	coenzyme Q5 methyltransferase	52064	chr5	+	115.28	115.297	UNC9958096	chr5	114.606	108.317	115.528	7.60615	8.43	6.21932	10.961	cis
17441130	Triap1	TP53 regulated inhibitor of apoptosis 1	69076	chr5	+	115.341	115.344	UNC9956581	chr5	114.5	113.051	115.532	7.52681	8.49965	6.22145	18.9423	cis
17441168	Pxn	paxillin	19303	chr5	+	115.516	115.556	JAX00593371	chr5	115.528	114.543	116.104	7.54738	8.16727	6.20515	18.8832	cis
17441188	Gm13840	predicted gene 13840	102639837	chr5	+	115.515	115.516	JAX00593426	chr5	115.776	114.938	117.387	7.4134	8.71493	6.17412	12.8319	cis
17441275	Cit	citron	12704	chr5	+	115.846	116.007	UNC9984576	chr5	116.59	115.568	116.934	7.60077	8.76431	6.2267	9.70806	cis
17235566	Eef2	eukaryotic translation elongation factor 2	13629	chr10	+	81.1766	81.1825	JAX00294057	chr10	82.9684	77.897	84.596	7.53668	8.38463	6.2406	7.59055	cis
17235584	Dapk3	death-associated protein kinase 3	13144	chr10	+	81.183	81.1932	backupJAX00293794	chr10	80.6111	76.6347	84.7013	7.55538	8.57219	6.22635	9.54552	cis
17235663	Pip5k1c	phosphatidylinositol-4-phosphate 5-kinase, type 1 gamma	18717	chr10	+	81.3075	81.3197	JAX00294080	chr10	83.0581	79.5985	87.6052	7.58565	8.38754	6.21108	9.00937	cis
17441490	Fbxo21	F-box protein 21	231670	chr5	+	117.977	118.009	UNC10020072	chr5	119.306	117.387	121.824	7.57993	8.37052	6.21526	11.8826	cis
17441526	2410131K14Rik	RIKEN cDNA 2410131K14 gene	76792	chr5	+	118.245	118.266	UNC10002547	chr5	117.788	117.78	118.438	7.66291	8.71642	6.21394	42.5758	cis
17441587	Gm16063	predicted gene 16063	330183	chr5	+	119.626	119.634	UNC10020072	chr5	119.306	116.518	120.679	7.52803	8.62633	6.20685	10.2217	cis
17441592	Gm16064	predicted gene 16064	105246778	chr5	+	119.646	119.659	UNC10014758	chr5	118.879	116.381	119.913	7.67051	8.59774	6.3414	10.7893	cis
17441624	Rbm19	RNA binding motif protein 19	74111	chr5	+	120.117	120.198	UNC10032372	chr5	120.287	119.238	122.547	7.55169	8.31232	6.2418	8.95266	cis
17441671	Slc8b1	solute carrier family 8 (sodium/lithium/calcium exchanger), member B1	170756	chr5	+	120.511	120.534	UNC10036627	chr5	120.679	120.336	120.873	7.40281	8.60573	6.14747	34.7272	cis
17441810	Hectd4	HECT domain E3 ubiquitin protein ligase 4	269700	chr5	+	121.254	121.368	UNC10046654	chr5	121.585	120.336	122.492	7.57028	8.46203	6.19999	10.3978	cis
17441924	Tmem116	transmembrane protein 116	77462	chr5	+	121.452	121.524	UNC10037634	chr5	120.8	117.264	121.887	7.55194	8.4602	6.23545	10.2157	cis
17441952	Brap	BRCA1 associated protein	72399	chr5	+	121.661	121.687	UNC050201332	chr5	121.63	118.825	121.824	7.37424	8.29187	6.21465	15.2011	cis
17442082	Gpn3	GPN-loop GTPase 3	68080	chr5	+	122.372	122.383	UNC10056550	chr5	122.428	121.942	122.901	7.47699	8.65916	6.20319	31.0277	cis
17442128	P2rx7	purinergic receptor P2X, ligand-gated ion channel, 7	18439	chr5	+	122.644	122.691	UNC10061728	chr5	122.849	122.169	122.901	7.49215	8.66074	6.22032	41.1556	cis
17442227	Psmd9	proteasome (prosome, macropain) 26S subunit, non-ATPase, 9	67151	chr5	+	123.228	123.249	UNC10066294	chr5	123.27	123.002	125.384	7.59604	8.17178	6.27086	16.5152	cis
17442428	Hip1r	huntingtin interacting protein 1 related	29816	chr5	+	123.974	124.003	JAX00594948	chr5	121.962	121.824	126.393	7.39195	8.29346	6.15847	13.0967	cis
17442474	Arl6ip4	ADP-ribosylation factor-like 6 interacting protein 4	65105	chr5	+	124.116	124.118	UNC10076254	chr5	124.113	121.824	125.401	7.66929	8.63451	6.18033	11.6282	cis
17442534	Ddx55	DEAD (Asp-Glu-Ala-Asp) box polypeptide 55	67848	chr5	+	124.553	124.569	UNC10081032	chr5	124.584	122.849	125.008	7.41227	8.36572	6.26603	10.0563	cis
17442553	Gtf2h3	general transcription factor IIH, polypeptide 3	209357	chr5	+	124.582	124.596	UNC10098882	chr5	126.001	124.035	127.841	7.46315	8.50525	6.15058	7.92669	cis
17442568	Tctn2	tectonic family member 2	67978	chr5	+	124.599	124.628	UNC10072913	chr5	123.84	123.159	125.401	7.30002	8.12981	6.17483	22.3367	cis
17442588	Atp6v0a2	ATPase, H+ transporting, lysosomal V0 subunit A2	21871	chr5	+	124.629	124.722	UNC10081774	chr5	124.711	122.547	125.786	7.4758	8.42725	6.20763	9.58693	cis
17442780	Glt1d1	glycosyltransferase 1 domain containing 1	319804	chr5	+	127.632	127.708	JAX00596378	chr5	127.661	127.178	133.253	7.42196	8.2931	6.1373	10.9392	cis
17442863	Sfswap	splicing factor SWAP	231769	chr5	+	129.501	129.571	UNC10151522	chr5	129.162	127.571	130.271	7.63467	8.42127	6.2698	16.8994	cis
17442898	Mrps17	mitochondrial ribosomal protein S17	66258	chr5	+	129.716	129.719	JAX00597146	chr5	129.507	129.437	129.846	7.50181	8.33972	6.21499	34.3413	cis
17442909	Nipsnap2	nipsnap homolog 2	14467	chr5	+	129.739	129.758	UNC10147377	chr5	128.929	128.11	129.846	7.54001	8.45701	6.20853	15.6394	cis
17442925	Cct6a	chaperonin containing Tcp1, subunit 6a (zeta)	12466	chr5	+	129.787	129.846	UNC10162978	chr5	129.872	128.835	130.271	7.50141	8.37242	6.22774	36.5551	cis
17442944	Sumf2	sulfatase modifying factor 2	67902	chr5	+	129.847	129.864	UNC10167928	chr5	130.271	129.846	130.928	7.67541	8.51077	6.2383	20.8924	cis
17442958	Zbed5	zinc finger, BED type containing 5	71970	chr5	+	129.896	129.904	UNC10162407	chr5	129.846	128.979	130.928	7.57724	8.30151	6.22601	19.9474	cis
17442966	Nupr1l	nuclear protein transcriptional regulator 1 like	69034	chr5	+	129.909	129.911	UNC10166955	chr5	130.176	129.7	130.348	7.52976	8.37164	6.15971	31.7402	cis
17442970	Vkorc1l1	vitamin K epoxide reductase complex, subunit 1-like 1	69568	chr5	+	129.942	129.984	UNC10162978	chr5	129.872	127.466	131.965	7.47478	8.41264	6.21775	8.31812	cis
17442977	Crcp	calcitonin gene-related peptide-receptor component protein	12909	chr5	+	130.029	130.061	UNC10167928	chr5	130.271	127.687	130.958	7.51847	8.62726	6.2248	8.19241	cis
17442985	Tpst1	protein-tyrosine sulfotransferase 1	22021	chr5	+	130.073	130.136	UNC10166955	chr5	130.176	129.125	132.11	7.4394	8.05928	6.16787	7.87994	cis
17443069	Gatsl2	GATS protein-like 2	80909	chr5	+	134.1	134.144	UNC10224363	chr5	134.159	133.76	135.597	7.41659	8.22634	6.19196	10.1527	cis
17443083	Gtf2ird2	GTF2I repeat domain containing 2	114674	chr5	+	134.191	134.218	UNC10224363	chr5	134.159	133.706	135.569	7.47624	8.24571	6.18754	12.539	cis
17443114	Rfc2	replication factor C (activator 1) 2	19718	chr5	+	134.583	134.598	JAX00136047	chr5	134.651	133.731	135.597	7.32185	8.17328	6.1537	10.5815	cis
17443133	Mettl27	methyltransferase like 27	79565	chr5	+	134.932	134.941	UNC10243742	chr5	135.542	134.018	135.597	7.45648	8.46925	6.1497	38.9359	cis
17443154	Abhd11	abhydrolase domain containing 11	68758	chr5	+	135.009	135.012	UNC10244171	chr5	135.569	133.961	135.597	7.45386	8.18265	6.16854	10.4878	cis
17443208	Tbl2	transducin (beta)-like 2	27368	chr5	+	135.15	135.163	UNC10235398	chr5	134.909	134.895	135.597	7.33913	8.30235	6.20687	27.5056	cis
17443275	Rhbdd2	rhomboid domain containing 2	215160	chr5	+	135.633	135.646	UNC10245402	chr5	135.659	135.569	136.021	7.41604	8.21847	6.20405	9.64517	cis
17443342	Hspb1	heat shock protein 1	15507	chr5	+	135.888	135.89	UNC10259209	chr5	136.801	135.754	139.463	7.33386	8.31172	6.20973	9.88011	cis
17443468	4933404O12Rik	RIKEN cDNA 4933404O12 gene	66752	chr5	+	136.919	136.937	UNC10244171	chr5	135.569	134.254	137.286	7.49117	8.25654	6.23171	9.564	cis
17443486	Cldn15	claudin 15	60363	chr5	+	136.968	136.976	UNC10262279	chr5	136.986	133.87	137.316	7.39478	8.46748	6.24025	10.4574	cis
17443495	Plod3	procollagen-lysine, 2-oxoglutarate 5-dioxygenase 3	26433	chr5	+	136.987	136.996	UNC10265203	chr5	137.16	136.801	138.76	7.53031	8.33886	6.20267	9.63766	cis
17443683	Ppp1r35	protein phosphatase 1, regulatory subunit 35	69871	chr5	+	137.779	137.78	JAX00136267	chr5	137.633	137.16	138.733	7.5113	8.58715	6.2116	23.6642	cis
17443710	Azgp1	alpha-2-glycoprotein 1, zinc	12007	chr5	+	137.982	137.99	UNC10275715	chr5	138.2	137.524	138.733	7.58972	8.24672	6.19847	14.6695	cis
17443732	Zkscan1	zinc finger with KRAB and SCAN domains 1	74570	chr5	+	138.085	138.108	UNC10270270	chr5	137.645	137.391	138.739	7.40376	8.25176	6.14275	17.8433	cis
17443742	Zscan21	zinc finger and SCAN domain containing 21	22697	chr5	+	138.117	138.134	UNC050557632	chr5	138.648	137.784	138.795	7.38972	8.07995	6.2127	23.821	cis
17443752	Cops6	COP9 signalosome subunit 6	26893	chr5	+	138.161	138.164	UNC10278936	chr5	138.476	137.524	139.059	7.46861	8.20762	6.21371	12.3782	cis
17443785	Cnpy4	canopy FGF signaling regulator 4	66455	chr5	+	138.188	138.194	UNC10275242	chr5	138.155	137.316	139.051	7.58265	8.41611	6.22207	15.1771	cis
17443797	Mblac1	metallo-beta-lactamase domain containing 1	330216	chr5	+	138.194	138.196	UNC10278230	chr5	138.442	135.597	139.989	7.41061	8.13238	6.20327	13.1937	cis
17443803	Nxpe5	neurexophilin and PC-esterase domain family, member 5	381680	chr5	+	138.226	138.253	UNC10269463	chr5	137.584	137.006	138.733	7.66724	8.43389	6.19813	11.5607	cis
17443818	Lamtor4	late endosomal/lysosomal adaptor, MAPK and MTOR activator 4	66096	chr5	+	138.255	138.259	UNC10279642	chr5	138.549	136.801	139.613	7.47167	8.32462	6.19997	9.07584	cis
17443883	Zfp157	zinc finger protein 157	72154	chr5	+	138.442	138.461	UNC10274358	chr5	138.014	137.16	138.76	7.56804	8.45228	6.22044	16.6366	cis
17443892	A430033K04Rik	RIKEN cDNA A430033K04 gene	243308	chr5	+	138.623	138.649	UNC10272246	chr5	137.822	137.462	138.632	7.53093	8.32199	6.20538	21.1999	cis
17443924	Dnaaf5	dynein, axonemal assembly factor 5	433956	chr5	+	139.15	139.186	JAX00599169	chr5	139.067	137.391	139.463	7.54709	8.55816	6.2427	14.7489	cis
17443940	Sun1	Sad1 and UNC84 domain containing 1	77053	chr5	+	139.21	139.249	UNC10293590	chr5	139.506	138.117	139.865	7.42676	8.45503	6.23196	11.2528	cis
17235783	BC025920	zinc finger protein pseudogene	268319	chr10	+	81.6063	81.6207	UNC18309473	chr10	81.6616	79.7924	84.1528	7.50724	8.3803	6.21495	12.6411	cis
17235821	Gm10778	predicted gene 10778	100233208	chr10	+	81.6491	81.6672	JAX00293893	chr10	81.5129	79.8886	82.3472	7.48056	8.49063	6.17983	8.61303	cis
17235826	Zfp433	zinc finger protein 433	73610	chr10	+	81.7048	81.7203	UNC18304372	chr10	80.9418	80.84	82.3472	7.44828	8.72147	6.20694	24.2704	cis
17235911	1700028I16Rik	RIKEN cDNA 1700028I16 gene	70003	chr10	+	82.8122	82.824	UNC18311938	chr10	82.3472	79.8886	83.1625	7.48442	8.23846	6.19837	9.05092	cis
17444037	Mafk	v-maf musculoaponeurotic fibrosarcoma oncogene family, protein K (avian)	17135	chr5	+	139.792	139.802	UNC10297499	chr5	139.775	138.733	140.586	7.43528	8.45216	6.25536	10.4366	cis
17444059	Gm16120	predicted gene 16120	105242545	chr5	+	140.208	140.211	UNC10312284	chr5	140.961	140.682	142.084	7.36049	8.22403	6.16267	8.96746	cis
17444068	Nudt1	nudix (nucleoside diphosphate linked moiety X)-type motif 1	17766	chr5	+	140.332	140.338	UNC10306321	chr5	140.457	139.865	140.781	7.53861	8.48291	6.23478	16.635	cis
17444080	Eif3b	eukaryotic translation initiation factor 3, subunit B	27979	chr5	+	140.42	140.443	UNC10293590	chr5	139.506	139.051	140.554	7.4993	8.22656	6.2037	8.71069	cis
17444304	0610040B10Rik	RIKEN cDNA 0610040B10 gene	67672	chr5	+	143.329	143.333	UNC10347458	chr5	143.486	142.053	143.601	7.66034	8.4015	6.27089	18.8152	cis
17444346	Daglb	diacylglycerol lipase, beta	231871	chr5	+	143.465	143.504	backuprs50781556	chr5	142.865	142.798	143.64	7.31838	7.84332	6.19895	23.7997	cis
17444364	Fam220a	family with sequence similarity 220, member A	67238	chr5	+	143.549	143.564	UNC10341868	chr5	143.139	142.675	143.613	7.5518	8.70503	6.19548	21.3047	cis
17444372	Cyth3	cytohesin 3	19159	chr5	+	143.623	143.71	UNC10351060	chr5	143.755	142.364	143.981	7.41045	8.38054	6.17698	8.72502	cis
17444389	D130017N08Rik	RIKEN cDNA D130017N08 gene	320064	chr5	+	143.758	143.767	UNC10349442	chr5	143.613	141.99	145.655	7.59058	8.42578	6.21484	8.24879	cis
17444398	Eif2ak1	eukaryotic translation initiation factor 2 alpha kinase 1	15467	chr5	+	143.818	143.904	UNC10358805	chr5	144.329	142.648	146.335	7.45198	8.45184	6.22105	13.1319	cis
17444628	Bud31	BUD31 homolog	231889	chr5	+	145.14	145.148	JAX00600487	chr5	145.453	144.273	146.703	7.38582	8.41262	6.14035	7.89132	cis
17444640	Cpsf4	cleavage and polyadenylation specific factor 4	54188	chr5	+	145.167	145.182	JAX00136825	chr5	145.129	145.019	146.335	7.4588	8.24252	6.15069	24.0317	cis
17444664	Zfp655	zinc finger protein 655	72611	chr5	+	145.232	145.247	JAX00136841	chr5	145.339	144.273	146.563	7.51571	8.5145	6.19767	8.79533	cis
17444697	Cyp3a59	cytochrome P450, family 3, subfamily a, polypeptide 59	100041449	chr5	+	146.113	146.113	JAX00136825	chr5	145.129	144.859	146.845	7.60338	8.36041	6.22798	23.2815	cis
17444813	Gtf3a	general transcription factor III A	66596	chr5	+	146.949	146.956	UNC10390319	chr5	147.005	146.409	147.895	7.40715	8.28022	6.23008	9.90762	cis
17444828	Polr1d	polymerase (RNA) I polypeptide D	20018	chr5	+	147.077	147.111	UNC10404264	chr5	147.917	146.819	147.968	7.48863	8.54451	6.18212	14.4896	cis
17444913	2210417A02Rik	RIKEN cDNA 2210417A02 gene	70138	chr5	+	148.742	148.743	JAX00601150	chr5	148.501	148.378	149.01	7.53077	8.58489	6.21474	14.76	cis
17444933	Gm15408	predicted gene 15408	100503307	chr5	+	149.007	149.012	backupUNC050251626	chr5	149.045	148.815	149.105	7.62718	8.64271	6.17305	19.7441	cis
17444961	Alox5ap	arachidonate 5-lipoxygenase activating protein	11690	chr5	+	149.265	149.288	backupUNC050251626	chr5	149.045	148.772	150.89	7.57746	8.48357	6.22203	12.1924	cis
17445044	B3glct	beta-3-glucosyltransferase	381694	chr5	+	149.696	149.762	JAX00601408	chr5	149.524	149.045	151.339	7.60298	8.43572	6.29986	13.2307	cis
17445089	Fry	FRY microtubule binding protein	320365	chr5	+	150.119	150.497	UNC10439153	chr5	149.874	148.74	150.735	7.46896	8.43211	6.23001	11.9882	cis
17445193	Pds5b	PDS5 cohesin associated factor B	100710	chr5	+	150.674	150.808	UNC10452139	chr5	150.678	149.65	151.734	7.42491	8.29989	6.20268	11.7949	cis
17445246	1700028E10Rik	RIKEN cDNA 1700028E10 gene	625175	chr5	+	151.369	151.414	UNC050510552	chr5	150.737	149.045	151.734	7.43453	8.52001	6.2044	8.78818	cis
17445280	Ankib1	ankyrin repeat and IBR domain containing 1	70797	chr5	-	3.69249	3.80301	UNC8543985	chr5	3.74444	3.16008	9.26593	7.47853	7.97664	6.23852	11.689	cis
17445325	Fzd1	frizzled class receptor 1	14362	chr5	-	4.75408	4.75816	backupUNC050315457	chr5	3.97324	3.53111	5.14906	7.43025	8.0263	6.15564	21.5658	cis
17445370	Cldn12	claudin 12	64945	chr5	-	5.50513	5.51496	UNC8564033	chr5	5.29665	3.16008	9.0408	7.39095	8.23195	6.17145	12.267	cis
17445381	Gtpbp10	GTP-binding protein 10 (putative)	207704	chr5	-	5.53854	5.55954	backupJAX00126650	chr5	5.65922	3.16008	9.0408	7.52539	8.34267	6.22036	12.0343	cis
17445426	Steap2	six transmembrane epithelial antigen of prostate 2	74051	chr5	-	5.66593	5.6945	backupJAX00126650	chr5	5.65922	5.29665	9.0408	7.55894	8.64553	6.21426	20.7888	cis
17445453	Zfp804b	zinc finger protein 804B	207618	chr5	-	6.76919	7.34437	backupJAX00126650	chr5	5.65922	4.24607	9.50816	7.37926	8.45647	6.18742	15.8097	cis
17445525	Rundc3b	RUN domain containing 3B	242819	chr5	-	8.49082	8.62278	UNC050008128	chr5	6.28943	3.16008	9.0408	7.40193	8.34795	6.2032	11.5843	cis
17445860	Napepld	N-acyl phosphatidylethanolamine phospholipase D	242864	chr5	-	21.6632	21.7013	UNC8776478	chr5	21.9218	20.9661	24.0803	7.43553	8.45731	6.17761	15.8772	cis
17445996	Orc5	origin recognition complex, subunit 5	26429	chr5	-	22.4867	22.5504	UNC8795767	chr5	23.2536	22.3285	24.9198	7.48581	8.45581	6.25623	14.0979	cis
17446060	AI506816	expressed sequence AI506816	433855	chr5	-	23.6924	23.7104	UNC050461785	chr5	23.1793	20.9661	24.522	7.56019	8.16092	6.26202	16.6358	cis
17446068	Pus7	pseudouridylate synthase 7	78697	chr5	-	23.7412	23.7837	UNC8813170	chr5	24.522	22.662	24.6821	7.45894	8.51575	6.24488	24.084	cis
17446100	Fam126a	family with sequence similarity 126, member A	84652	chr5	-	23.9153	24.0306	UNC8813170	chr5	24.522	22.1747	29.926	7.46736	8.35466	6.19408	7.61832	cis
17446289	Wdr86	WD repeat domain 86	269633	chr5	-	24.7118	24.7307	JAX00576478	chr5	24.712	24.6104	25.004	7.37493	8.20134	6.1118	42.7048	cis
17446322	Prkag2	protein kinase, AMP-activated, gamma 2 non-catalytic subunit	108099	chr5	-	24.8633	25.1006	UNC8822438	chr5	25.161	24.9322	27.3273	7.56166	8.62919	6.21407	10.1862	cis
17446424	Xrcc2	X-ray repair complementing defective repair in Chinese hamster cells 2	57434	chr5	-	25.6903	25.7058	JAX00576349	chr5	24.2827	21.6142	25.161	7.43789	8.3453	6.20445	8.00524	cis
17235915	Txnrd1	thioredoxin reductase 1	50493	chr10	+	82.834	82.8968	UNC100092985	chr10	83.0472	77.4567	84.7412	7.46642	8.55089	6.19907	10.234	cis
17236018	Polr3b	polymerase (RNA) III (DNA directed) polypeptide B	70428	chr10	+	84.6224	84.726	UNC18355149	chr10	85.5922	84.4176	86.2443	7.48502	8.36633	6.23649	13.2186	cis
17236102	Btbd11	BTB (POZ) domain containing 11	74007	chr10	+	85.3868	85.6586	UNC18353913	chr10	85.5155	85.1901	85.7522	7.42254	8.19648	6.18836	18.3524	cis
17236132	Pwp1	PWP1 homolog, endonuclein	103136	chr10	+	85.8719	85.8887	UNC18377858	chr10	87.6904	85.7522	88.2707	7.45158	8.2812	6.1997	9.32993	cis
17446561	Gm26608	predicted gene, 26608	102638633	chr5	-	28.02	28.0711	JAX00128204	chr5	27.8561	27.7981	28.2762	7.46425	8.40319	6.15507	30.9261	cis
17446627	Tyms	thymidylate synthase	22171	chr5	-	30.0587	30.0735	UNC8873814	chr5	28.9815	28.2762	30.4096	7.50972	8.33974	6.21735	16.3563	cis
17446760	Ost4	oligosaccharyltransferase complex subunit 4 (non-catalytic)	67695	chr5	-	30.9062	30.9078	UNC8874681	chr5	29.0695	28.6927	31.9688	7.54971	8.35365	6.26367	8.14873	cis
17446775	Preb	prolactin regulatory element binding	50907	chr5	-	30.951	30.9602	UNC8890492	chr5	30.5376	28.2002	31.9688	7.44785	8.26089	6.20273	13.2153	cis
17446793	Slc5a6	solute carrier family 5 (sodium-dependent vitamin transporter), member 6	330064	chr5	-	31.0361	31.0488	UNC8888527	chr5	30.4096	29.0005	32.1146	7.46739	8.4551	6.23553	8.67851	cis
17446817	Slc30a3	solute carrier family 30 (zinc transporter), member 3	22784	chr5	-	31.0862	31.0935	UNC050326871	chr5	31.005	30.3599	31.8994	7.52054	8.2516	6.20259	26.4303	cis
17446836	Mpv17	MpV17 mitochondrial inner membrane protein	17527	chr5	-	31.1414	31.1543	UNC8897625	chr5	31.0986	31.063	31.369	7.41047	8.42577	6.15151	67.0298	cis
17446915	Ppm1g	protein phosphatase 1G (formerly 2C), magnesium-dependent, gamma isoform	14208	chr5	-	31.2027	31.2205	UNC8905523	chr5	31.8143	29.0267	32.1146	7.5534	8.42152	6.27821	9.62824	cis
17447000	Supt7l	suppressor of Ty 7-like	72195	chr5	-	31.5154	31.5267	UNC8906296	chr5	31.8994	28.6927	32.1618	7.40226	8.31005	6.21458	10.401	cis
17447045	Pisd	phosphatidylserine decarboxylase	320951	chr5	-	32.7371	32.7745	UNC8909337	chr5	32.1618	32.1146	32.4269	7.528	8.41377	6.20832	18.8156	cis
17447063	Prr14l	proline rich 14-like	215476	chr5	-	32.792	32.8542	backupUNC050083156	chr5	32.4152	32.1935	33.421	7.51718	8.28159	6.19611	19.096	cis
17447081	Spon2	spondin 2, extracellular matrix protein	100689	chr5	-	33.2136	33.2182	UNC8921483	chr5	33.2784	32.3731	35.1981	7.43161	8.29592	6.14614	8.29373	cis
17447143	Tmem129	transmembrane protein 129	68366	chr5	-	33.6534	33.658	UNC8922474	chr5	33.3807	32.1935	37.0143	7.49186	8.68407	6.22819	11.8765	cis
17447185	Poln	DNA polymerase N	272158	chr5	-	34.0073	34.1694	JAX00578363	chr5	34.1626	32.4152	35.9336	7.43673	8.30115	6.19273	8.95522	cis
17447259	Tnip2	TNFAIP3 interacting protein 2	231130	chr5	-	34.4962	34.5139	UNC8924128	chr5	33.5295	32.3931	35.307	7.55098	8.46949	6.23116	12.7727	cis
17447310	Lrpap1	low density lipoprotein receptor-related protein associated protein 1	16976	chr5	-	35.092	35.1057	UNC8940486	chr5	35.1981	32.1146	36.2534	7.39543	8.36756	6.18542	7.42176	cis
17447365	Htra3	HtrA serine peptidase 3	78558	chr5	-	35.6521	35.6797	JAX00578592	chr5	35.307	32.4269	41.945	7.47078	8.48834	6.16391	7.65533	cis
17447451	Tbc1d14	TBC1 domain family, member 14	100855	chr5	-	36.4922	36.5923	UNC8965349	chr5	36.9078	35.8999	40.7467	7.45054	8.22836	6.17775	10.4003	cis
17447514	Man2b2	mannosidase 2, alpha B2	17160	chr5	-	36.8069	36.8306	UNC8968225	chr5	37.0557	34.569	38.3432	7.4359	8.27806	6.19887	10.6739	cis
17447560	Evc	EvC ciliary complex subunit 1	59056	chr5	-	37.2895	37.3335	JAX00579207	chr5	37.2209	37.0557	37.4472	7.4889	8.34399	6.19304	27.0711	cis
17447615	Nsg1	neuron specific gene family member 1	18196	chr5	-	38.1374	38.1594	UNC8972557	chr5	37.2793	37.0557	41.2805	7.58784	8.47336	6.23361	8.17141	cis
17447646	Slc2a9	solute carrier family 2 (facilitated glucose transporter), member 9	117591	chr5	-	38.3498	38.5031	UNC8992043	chr5	38.5099	38.1823	38.7834	7.47175	8.38901	6.15054	25.2461	cis
17447689	Zfp518b	zinc finger protein 518B	100515	chr5	-	38.6696	38.6847	UNC8994596	chr5	38.6664	37.1035	43.7139	7.37912	8.15411	6.20054	9.17955	cis
17447737	Rab28	RAB28, member RAS oncogene family	100972	chr5	-	41.6254	41.7081	UNC9004443	chr5	39.416	39.2411	42.2482	7.44221	8.15911	6.20688	11.9712	cis
17447757	Bod1l	biorientation of chromosomes in cell division 1-like	665775	chr5	-	41.7883	41.844	UNC9036507	chr5	41.8109	41.2454	42.2482	7.66122	8.88098	6.2568	10.254	cis
17447835	Prom1	prominin 1	19126	chr5	-	44.0008	44.102	UNC9071377	chr5	44.3884	40.8149	45.2866	7.64705	8.51844	6.23965	10.4179	cis
17447868	Tapt1	transmembrane anterior posterior transformation 1	231225	chr5	-	44.1763	44.2265	UNC9064193	chr5	43.9399	42.1161	44.7145	7.45318	8.24904	6.17229	13.2764	cis
17447904	Qdpr	quinoid dihydropteridine reductase	110391	chr5	-	45.4343	45.4502	UNC9041493	chr5	42.2482	40.6982	50.3196	7.54125	8.52143	6.25584	12.5737	cis
17447940	Lcorl	ligand dependent nuclear receptor corepressor-like	209707	chr5	-	45.6999	45.8575	UNC9092235	chr5	45.934	44.0421	48.8176	7.48062	8.2071	6.18643	8.16815	cis
17447979	Adgra3	adhesion G protein-coupled receptor A3	70693	chr5	-	49.9602	50.0589	UNC9156124	chr5	50.2424	49.486	51.4864	7.52365	8.38085	6.21042	14.8494	cis
17448050	Ccdc149	coiled-coil domain containing 149	100503884	chr5	-	52.3749	52.4715	UNC9176288	chr5	51.791	51.0461	52.6576	7.46768	8.61095	6.25538	14.1208	cis
17448099	5033403H07Rik	RIKEN cDNA 5033403H07 gene	75954	chr5	-	52.9731	52.9923	UNC9193024	chr5	52.9746	51.627	53.5534	7.41725	8.60623	6.19768	11.6089	cis
17448106	Sel1l3	sel-1 suppressor of lin-12-like 3 (C. elegans)	231238	chr5	-	53.108	53.2134	UNC9199896	chr5	53.5098	52.9431	53.5808	7.42896	8.59872	6.23567	20.1539	cis
17448174	Arap2	ArfGAP with RhoGAP domain, ankyrin repeat and PH domain 2	212285	chr5	-	62.6035	62.766	UNC9266579	chr5	58.8101	57.6143	60.022	7.43072	8.07304	6.12984	11.3204	cis
17448251	Tlr6	toll-like receptor 6	21899	chr5	-	64.9531	64.96	UNC9348157	chr5	65.0461	64.5345	66.0349	7.37922	8.15097	6.20091	18.9834	cis
17448324	Smim14	small integral membrane protein 14	68552	chr5	-	65.4475	65.5369	UNC9371058	chr5	66.7142	65.0461	67.4405	7.48504	8.25451	6.17621	7.99494	cis
17448467	Bend4	BEN domain containing 4	666938	chr5	-	67.3952	67.4278	UNC9340525	chr5	64.4923	63.317	71.9096	7.56762	8.49865	6.18664	9.26586	cis
17448475	Atp8a1	ATPase, aminophospholipid transporter (APLT), class I, type 8A, member 1	11980	chr5	-	67.6186	67.8472	UNC9423046	chr5	70.5379	66.3836	71.287	7.64572	8.47809	6.23594	13.634	cis
17448565	Gabrg1	gamma-aminobutyric acid (GABA) A receptor, subunit gamma 1	14405	chr5	-	70.7512	70.8424	UNC9462271	chr5	73.7417	68.3619	73.9751	8.50097	9.8601	6.62769	12.3654	cis
17448607	Commd8	COMM domain containing 8	27784	chr5	-	72.1574	72.1682	UNC9439546	chr5	72.187	71.8693	72.2247	7.47236	8.31406	6.20014	40.9953	cis
17448614	Corin	corin	53419	chr5	-	72.3014	72.5045	JAX00585563	chr5	72.2466	72.187	72.6205	7.4226	8.39035	6.15804	48.156	cis
17448645	Nfxl1	nuclear transcription factor, X-box binding-like 1	100978	chr5	-	72.5139	72.5596	UNC9441965	chr5	72.3555	72.2247	73.2573	7.30468	7.89494	6.16013	17.8426	cis
17448712	Tec	tec protein tyrosine kinase	21682	chr5	-	72.7559	72.8684	UNC9450845	chr5	72.9002	72.187	74.2479	7.44057	8.44834	6.21116	30.348	cis
17236155	Fbxo7	F-box protein 7	69754	chr10	+	86.022	86.0505	JAX00294607	chr10	85.9461	84.7975	87.916	7.37942	8.43084	6.19829	9.40031	cis
17236269	Pah	phenylalanine hydroxylase	18478	chr10	+	87.5218	87.5839	UNC18375617	chr10	87.4889	85.9927	91.266	7.59688	8.38962	6.24526	7.60999	cis
17236327	Washc3	WASH complex subunit 3	67282	chr10	+	88.2011	88.2461	UNC18379825	chr10	87.94	86.467	88.9281	7.45508	8.30944	6.19553	7.76873	cis
17448821	Ociad2	OCIA domain containing 2	433904	chr5	-	73.3224	73.3389	UNC9457698	chr5	73.4102	73.2062	74.0202	7.49589	8.59909	6.2734	15.2145	cis
17448880	Lnx1	ligand of numb-protein X 1	16924	chr5	-	74.5929	74.7029	UNC9476029	chr5	74.7647	74.2072	75.0427	7.42297	8.58913	6.19023	40.0339	cis
17449033	Ppat	phosphoribosyl pyrophosphate amidotransferase	231327	chr5	-	76.9141	76.9514	UNC9504160	chr5	76.7282	75.8477	88.0345	7.51727	8.25369	6.20777	13.1872	cis
17449052	Hopx	HOP homeobox	74318	chr5	-	77.0864	77.1152	UNC9507833	chr5	76.9604	76.6475	77.2189	7.48586	8.28291	6.22445	19.3514	cis
17449073	Noa1	nitric oxide associated 1	56412	chr5	-	77.2942	77.3094	UNC9527662	chr5	78.4041	77.0468	83.4751	7.67022	8.62386	6.20505	10.0712	cis
17449155	Cenpc1	centromere protein C1	12617	chr5	-	86.0121	86.0655	UNC9594903	chr5	83.6174	80.0352	89.0884	7.53962	8.20437	6.23464	12.6278	cis
17449322	Ugt2b1	UDP glucuronosyltransferase 2 family, polypeptide B1	71773	chr5	-	86.9168	86.9263	JAX00587900	chr5	87.1483	81.4211	91.3679	7.41711	8.46184	6.18445	9.65439	cis
17449332	Ugt2b36	UDP glucuronosyltransferase 2 family, polypeptide B36	231396	chr5	-	87.066	87.0923	UNC9672954	chr5	90.7451	86.0589	91.6178	7.49284	8.43384	6.23432	10.9457	cis
17449394	Sult1b1	sulfotransferase family 1B, member 1	56362	chr5	-	87.5144	87.5382	UNC9656205	chr5	89.5211	83.4751	90.4249	7.46862	8.39508	6.19623	13.2055	cis
17449406	Sult1d1	sulfotransferase family 1D, member 1	53315	chr5	-	87.5552	87.569	UNC9656205	chr5	89.5211	85.1784	90.7155	7.50299	8.19039	6.23923	12.9474	cis
17449473	Gc	group specific component	14473	chr5	-	89.4176	89.4579	JAX00588188	chr5	89.2811	77.0577	90.7155	7.5691	8.31372	6.2255	10.5509	cis
17449516	Cox18	cytochrome c oxidase assembly protein 18	231430	chr5	-	90.2148	90.224	UNC9667645	chr5	90.3714	86.6259	91.6489	7.46526	8.61704	6.16118	18.5582	cis
17449562	Rassf6	Ras association (RalGDS/AF-6) domain family member 6	73246	chr5	-	90.6038	90.6404	UNC9674024	chr5	90.8377	90.3714	91.3906	7.50849	8.60049	6.1823	23.3245	cis
17449578	Gm19619	predicted gene, 19619	100503265	chr5	-	91.2579	91.2831	UNC9682089	chr5	91.3906	89.2811	91.7976	7.34021	8.47531	6.16483	7.43872	cis
17449749	Scarb2	scavenger receptor class B, member 2	12492	chr5	-	92.4439	92.5055	UNC9691273	chr5	92.0229	91.7341	96.5749	7.49206	8.17075	6.15307	10.705	cis
17449800	Sowahb	sosondowah ankyrin repeat domain family member B	78088	chr5	-	93.0417	93.045	UNC9706592	chr5	93.0819	92.5394	96.4101	7.64354	8.82126	6.15268	11.945	cis
17449939	Antxr2	anthrax toxin receptor 2	71914	chr5	-	97.8865	98.0309	UNC9748116	chr5	98.5475	97.5039	99.0644	7.51533	8.38587	6.182	20.6316	cis
17450091	5430416N02Rik	RIKEN cDNA 5430416N02 gene	100503199	chr5	-	100.421	100.43	UNC050162074	chr5	100.987	100.011	101.49	7.42564	8.13199	6.25734	22.0722	cis
17450131	Coq2	coenzyme Q2 4-hydroxybenzoate polyprenyltransferase	71883	chr5	-	100.655	100.675	UNC9776914	chr5	100.489	99.7966	101.49	7.53538	8.5672	6.26109	27.8551	cis
17450157	Helq	helicase, POLQ-like	191578	chr5	-	100.762	100.799	UNC9781995	chr5	100.858	98.9947	102.108	7.44738	8.38742	6.23518	9.51691	cis
17450196	Abraxas1	BRCA1 A complex subunit	70681	chr5	-	100.841	100.847	UNC9781472	chr5	100.825	100.545	101.757	7.4127	8.27493	6.15693	30.1233	cis
17450366	Hsd17b11	hydroxysteroid (17-beta) dehydrogenase 11	114664	chr5	-	103.99	104.022	JAX00227426	chr5	103.671	103.554	104.126	7.56443	8.74599	6.17408	18.8162	cis
17450387	Sparcl1	SPARC-like 1	13602	chr5	-	104.079	104.114	UNC9843643	chr5	104.752	103.989	104.969	7.53502	8.35998	6.20437	17.844	cis
17450414	Abcg3	ATP binding cassette subfamily G member 3	27405	chr5	-	104.936	104.983	UNC9851320	chr5	105.639	104.793	106.165	7.43744	8.68679	6.16855	25.3239	cis
17450501	Gbp10	guanylate-binding protein 10	626578	chr5	-	105.239	105.24	UNC9825358	chr5	103.554	103.062	106.428	7.45625	8.34854	6.16568	21.0736	cis
17450515	Gbp11	guanylate binding protein 11	634650	chr5	-	105.323	105.331	UNC9850106	chr5	105.545	104.435	105.85	7.48869	8.29879	6.20147	31.8963	cis
17450641	Gm17202	predicted gene 17202	102636836	chr5	-	107.405	107.432	UNC9844922	chr5	104.863	103.601	110.604	7.4139	8.2323	6.20241	10.441	cis
17450690	Evi5	ecotropic viral integration site 5	14020	chr5	-	107.747	107.875	UNC9876955	chr5	107.798	106.761	108.377	7.48116	8.34098	6.12082	41.8685	cis
17450727	Tmed5	transmembrane p24 trafficking protein 5	73130	chr5	-	108.106	108.133	UNC9877912	chr5	107.911	106.34	112.789	7.4231	8.45004	6.1945	13.8103	cis
17450748	Mfsd7a	major facilitator superfamily domain containing 7A	243197	chr5	-	108.441	108.449	UNC9872014	chr5	107.296	106.377	110.503	7.55458	8.69305	6.20699	16.5227	cis
17450770	Gak	cyclin G associated kinase	231580	chr5	-	108.569	108.63	UNC9886049	chr5	108.693	108.389	110.604	7.59765	8.85125	6.23598	11.1466	cis
17450838	Rnf212	ring finger protein 212	671564	chr5	-	108.729	108.751	UNC9882721	chr5	108.389	107.911	110.418	7.4467	8.20967	6.26393	36.0183	cis
17450918	Crlf2	cytokine receptor-like factor 2	57914	chr5	-	109.555	109.559	UNC9880190	chr5	108.127	105.639	111.059	7.35724	8.36869	6.23352	10.7023	cis
17450937	4930522L14Rik	RIKEN cDNA 4930522L14 gene	100041734	chr5	-	109.737	109.752	UNC9930779	chr5	112.742	106.761	112.776	7.58344	8.39113	6.27613	11.8509	cis
17450942	Gm10416	zinc finger protein pseudogene	667213	chr5	-	109.834	109.834	UNC050171931	chr5	108.214	101.179	110.604	7.55949	8.32463	6.27414	8.59167	cis
17450950	LOC105246961	zinc finger protein 431-like	105246961	chr5	-	110.046	110.046	UNC9867770	chr5	106.924	106.428	112.763	7.49703	8.64838	6.20359	10.1677	cis
17450952	Gtpbp6	GTP binding protein 6 (putative)	107999	chr5	-	110.104	110.108	JAX00591603	chr5	108.724	108.596	110.503	7.48465	8.40402	6.23522	18.7729	cis
17450968	Gm15787	predicted gene 15787	100504007	chr5	-	110.155	110.176	UNC9899437	chr5	110.288	108.596	112.521	7.51369	8.48794	6.25263	12.9111	cis
17451002	P2rx2	purinergic receptor P2X, ligand-gated ion channel, 2	231602	chr5	-	110.34	110.343	UNC9886049	chr5	108.693	108.365	110.503	7.59443	8.36648	6.20309	29.902	cis
17213349	Carf	calcium response factor	241066	chr1	+	60.1054	60.1508	UNC769626	chr1	60.7031	59.3585	60.8801	7.43738	8.24601	6.20111	17.3319	cis
17213428	Cyp20a1	cytochrome P450, family 20, subfamily a, polypeptide 1	77951	chr1	+	60.353	60.3874	UNC774504	chr1	61.1275	59.3585	64.4686	7.45987	8.43349	6.21042	8.32441	cis
17213446	Abi2	abl-interactor 2	329165	chr1	+	60.4099	60.4797	UNC770116	chr1	60.7618	59.3585	62.0959	7.40965	8.22207	6.16191	10.4585	cis
17213515	Pard3b	par-3 family cell polarity regulator beta	72823	chr1	+	61.639	62.6419	UNC771487	chr1	60.8801	53.2165	65.0139	7.52491	8.08128	6.21113	9.68817	cis
17213548	Nrp2	neuropilin 2	18187	chr1	+	62.7033	62.8163	UNC789712	chr1	62.5942	61.3167	63.8959	7.58895	8.67631	6.21569	8.50013	cis
17213580	Eef1b2	eukaryotic translation elongation factor 1 beta 2	55949	chr1	+	63.1769	63.1801	UNC800056	chr1	63.6288	62.7852	65.0139	7.35029	8.28557	6.21645	12.6216	cis
17236339	Gnptab	N-acetylglucosamine-1-phosphate transferase, alpha and beta subunits	432486	chr10	+	88.3794	88.446	UNC18388567	chr10	88.594	88.2479	88.9566	7.5473	8.83005	6.18223	9.98565	cis
17236411	1500026H17Rik	RIKEN cDNA 1500026H17 gene	69002	chr10	+	89.6864	89.7008	UNC18399386	chr10	89.5109	88.9144	91.46	7.65395	8.51841	6.15806	8.34771	cis
17236525	Mir1931	microRNA 1931	100316689	chr10	+	93.1628	93.1629	UNC18454335	chr10	93.4824	92.6463	93.6624	7.47552	8.34361	6.23764	11.5183	cis
17236531	Lta4h	leukotriene A4 hydrolase	16993	chr10	+	93.4534	93.4847	UNC18451537	chr10	93.3192	93.1789	93.8704	7.54372	8.61473	6.18208	20.3629	cis
17451203	Srrd	SRR1 domain containing	70118	chr5	-	112.338	112.343	UNC9912182	chr5	111.301	106.509	114.323	7.50386	8.35364	6.25082	10.5211	cis
17451297	Grk3	G protein-coupled receptor kinase 3	320129	chr5	-	112.914	113.016	UNC9914574	chr5	111.515	110.428	113.162	7.26299	8.16581	6.16801	15.2144	cis
17451356	Sgsm1	small G protein signaling modulator 1	52850	chr5	-	113.243	113.311	UNC9938028	chr5	113.227	112.755	114.606	7.43185	8.37702	6.20879	10.2116	cis
17451504	Alkbh2	alkB homolog 2, alpha-ketoglutarate-dependent dioxygenase	231642	chr5	-	114.124	114.128	backupUNC050186463	chr5	114.192	113.593	114.323	7.47766	8.32518	6.18079	39.9758	cis
17451536	Mmab	methylmalonic aciduria (cobalamin deficiency) cblB type homolog (human)	77697	chr5	-	114.431	114.444	UNC9923297	chr5	112.231	108.575	114.606	7.52546	8.6906	6.24667	13.6546	cis
17451549	Trpv4	transient receptor potential cation channel, subfamily V, member 4	63873	chr5	-	114.622	114.645	UNC9931191	chr5	112.767	112.137	115.423	7.44514	8.39295	6.19	13.0973	cis
17451568	Gltp	glycolipid transfer protein	56356	chr5	-	114.669	114.691	UNC9958096	chr5	114.606	113.354	115.748	7.50008	8.4624	6.2561	13.7514	cis
17451578	Git2	G protein-coupled receptor kinase-interactor 2	26431	chr5	-	114.727	114.775	JAX00593279	chr5	114.912	110.428	116.555	7.40633	8.32	6.23476	8.3569	cis
17451605	4930515G01Rik	RIKEN cDNA 4930515G01 gene	67642	chr5	-	114.774	114.775	UNC9981883	chr5	116.413	114.543	116.59	7.4	8.2341	6.19961	12.7937	cis
17451607	1500011B03Rik	RIKEN cDNA 1500011B03 gene	66236	chr5	-	114.808	114.814	UNC9960435	chr5	114.769	112.755	115.626	7.44973	8.17616	6.22089	9.15165	cis
17451614	2610524H06Rik	RIKEN cDNA 2610524H06 gene	330173	chr5	-	114.822	114.823	UNC9981370	chr5	116.381	114.212	116.619	7.48345	8.17767	6.20316	10.4877	cis
17451649	Acads	acyl-Coenzyme A dehydrogenase, short chain	11409	chr5	-	115.11	115.118	UNC9957213	chr5	114.543	110.428	115.532	7.4275	8.51889	6.18204	10.4061	cis
17451668	Mlec	malectin	109154	chr5	-	115.144	115.158	UNC9966417	chr5	115.359	113.593	117.544	7.58603	8.46697	6.14168	13.3551	cis
17451721	Gatc	glutamyl-tRNA(Gln) amidotransferase, subunit C	384281	chr5	-	115.333	115.341	JAX00593297	chr5	115.057	114.27	115.532	7.34297	8.46432	6.19641	20.848	cis
17451726	Cox6a1	cytochrome c oxidase subunit VIa polypeptide 1	12861	chr5	-	115.346	115.349	JAX00593371	chr5	115.528	113.051	116.67	7.46772	8.18163	6.21491	7.97296	cis
17451746	1110006O24Rik	RIKEN cDNA 1110006O24 gene	66123	chr5	-	115.631	115.632	UNC9981370	chr5	116.381	115.528	116.555	7.46068	8.19669	6.18333	13.4768	cis
17451769	Prkab1	protein kinase, AMP-activated, beta 1 non-catalytic subunit	19079	chr5	-	116.014	116.024	UNC9969425	chr5	115.568	115.478	116.413	7.4903	8.397	6.2179	10.2114	cis
17451843	Suds3	suppressor of defective silencing 3 homolog (S. cerevisiae)	71954	chr5	-	117.092	117.113	backupUNC050193470	chr5	117.328	115.581	117.751	7.47193	8.60614	6.17731	14.3139	cis
17451886	Fbxw8	F-box and WD-40 domain protein 8	231672	chr5	-	118.065	118.155	UNC10015496	chr5	118.935	117.744	119.913	7.50741	8.44386	6.21382	13.4021	cis
17451972	Plbd2	phospholipase B domain containing 2	71772	chr5	-	120.484	120.503	UNC10032372	chr5	120.287	118.825	121.63	7.44237	8.10833	6.20076	11.3165	cis
17452018	Gm38700	predicted gene, 38700	105242431	chr5	-	120.594	120.613	UNC10035785	chr5	120.594	118.911	121.501	7.38887	8.35924	6.18979	9.16953	cis
17452038	Dtx1	deltex 1, E3 ubiquitin ligase	14357	chr5	-	120.68	120.712	UNC10033388	chr5	120.379	120.336	121.63	7.53173	8.34922	6.23913	18.6392	cis
17452178	Trafd1	TRAF type zinc finger domain containing 1	231712	chr5	-	121.372	121.385	UNC10033040	chr5	120.349	119.293	121.728	7.41114	8.18652	6.24485	11.1815	cis
17452194	Erp29	endoplasmic reticulum protein 29	67397	chr5	-	121.442	121.452	UNC10042402	chr5	121.158	120.336	122.244	7.52956	8.28879	6.20658	11.1825	cis
17452231	Aldh2	aldehyde dehydrogenase 2, mitochondrial	11669	chr5	-	121.566	121.594	UNC10037634	chr5	120.8	120.679	121.585	7.47703	8.47803	6.18991	26.4996	cis
17452264	Acad10	acyl-Coenzyme A dehydrogenase family, member 10	71985	chr5	-	121.621	121.66	UNC10048175	chr5	121.705	121.158	122.008	7.5897	8.54268	6.16879	24.6233	cis
17452378	Rad9b	RAD9 checkpoint clamp component B	231724	chr5	-	122.323	122.353	UNC10054525	chr5	122.244	121.962	122.901	7.42719	8.59796	6.20433	36.1717	cis
17452396	Fam216a	family with sequence similarity 216, member A	68948	chr5	-	122.365	122.372	JAX00595024	chr5	122.298	122.068	123.052	7.45725	8.58041	6.14724	25.7706	cis
17452430	Ift81	intraflagellar transport 81	12589	chr5	-	122.55	122.615	UNC10056550	chr5	122.428	122.008	123.84	7.48169	8.677	6.15192	18.02	cis
17452477	Anapc5	anaphase-promoting complex subunit 5	59008	chr5	-	122.788	122.821	UNC10055895	chr5	122.368	122.008	123.241	7.56435	8.4336	6.1638	13.9455	cis
17452498	Kdm2b	lysine (K)-specific demethylase 2B	30841	chr5	-	122.871	123.015	JAX00595167	chr5	122.996	122.849	123.396	7.60335	8.55907	6.20514	28.3439	cis
17452615	Diablo	diablo, IAP-binding mitochondrial protein	66593	chr5	-	123.512	123.524	UNC10066294	chr5	123.27	122.849	124.306	7.38012	8.17543	6.22177	24.1118	cis
17452625	Vps33a	VPS33A CORVET/HOPS core subunit	77573	chr5	-	123.529	123.573	UNC10067666	chr5	123.396	122.849	123.853	7.34052	8.19029	6.11949	28.9659	cis
17452713	Vps37b	vacuolar protein sorting 37B	330192	chr5	-	124.005	124.032	UNC10076254	chr5	124.113	123.754	126.931	7.60416	8.34272	6.20207	12.7286	cis
17452719	Abcb9	ATP-binding cassette, sub-family B (MDR/TAP), member 9	56325	chr5	-	124.062	124.096	UNC10089699	chr5	125.401	123.754	126.393	7.50219	8.34275	6.22436	11.0128	cis
17452741	Pitpnm2	phosphatidylinositol transfer protein, membrane-associated 2	19679	chr5	-	124.122	124.19	backupUNC050206499	chr5	124.512	122.307	126.001	7.51974	8.42619	6.23759	10.206	cis
17452861	Rilpl1	Rab interacting lysosomal protein-like 1	75695	chr5	-	124.493	124.531	UNC10101153	chr5	126.146	125.215	126.613	7.49309	8.2491	6.20884	10.234	cis
17452873	Eif2b1	eukaryotic translation initiation factor 2B, subunit 1 (alpha)	209354	chr5	-	124.571	124.579	UNC10065354	chr5	123.159	123.002	125.81	7.57508	8.27525	6.16241	13.229	cis
17452957	Scarb1	scavenger receptor class B, member 1	20778	chr5	-	125.277	125.341	UNC10088794	chr5	125.314	123.002	125.384	7.61626	8.64032	6.19022	20.6796	cis
17452978	Ubc	ubiquitin C	22190	chr5	-	125.386	125.39	UNC10090689	chr5	125.483	125.324	127.687	7.44684	8.45681	6.20634	10.0009	cis
17452989	Dhx37	DEAH (Asp-Glu-Ala-His) box polypeptide 37	208144	chr5	-	125.414	125.434	UNC10092023	chr5	125.566	121.158	126.353	7.60727	8.53035	6.19071	12.8966	cis
17453030	Slc15a4	solute carrier family 15, member 4	100561	chr5	-	127.596	127.609	UNC10125455	chr5	127.593	127.466	127.763	7.67623	8.31107	6.19143	25.6299	cis
17453106	Zfp11	zinc finger protein 11	22648	chr5	-	129.655	129.661	UNC10159778	chr5	129.653	128.929	130.271	7.61549	8.49958	6.22876	13.5597	cis
17453124	Psph	phosphoserine phosphatase	100678	chr5	-	129.766	129.787	UNC10167928	chr5	130.271	129.601	130.513	7.54577	8.26954	6.22051	24.4248	cis
17453272	Rcc1l	reculator of chromosome condensation 1 like	94254	chr5	-	134.148	134.177	UNC10259209	chr5	136.801	135.569	137.286	7.5375	8.42288	6.22156	9.49792	cis
17453304	Gtf2i	general transcription factor II I	14886	chr5	-	134.238	134.314	JAX00136067	chr5	134.895	133.122	135.597	7.42625	8.34515	6.21227	8.55551	cis
17453421	Eif4h	eukaryotic translation initiation factor 4H	22384	chr5	-	134.62	134.639	UNC10224946	chr5	134.194	133.822	135.006	7.44818	8.40447	6.18342	12.4137	cis
17453513	Bud23	BUD23, rRNA methyltransferase and ribosome maturation factor	66138	chr5	-	135.053	135.065	JAX00136067	chr5	134.895	134.76	135.597	7.47178	8.24668	6.2045	17.1262	cis
17453611	Ccl24	chemokine (C-C motif) ligand 24	56221	chr5	-	135.57	135.573	UNC10245791	chr5	135.692	135.569	135.754	7.44439	8.05068	6.17944	30.3021	cis
17453650	Ywhag	tyrosine 3-monooxygenase/tryptophan 5-monooxygenase activation protein, gamma polypeptide	22628	chr5	-	135.91	135.935	UNC10262562	chr5	137.006	135.872	138.739	7.39354	8.71004	6.16817	7.40065	cis
17453726	Cux1	cut-like homeobox 1	13047	chr5	-	136.248	136.567	UNC10251451	chr5	136.104	135.812	137.006	7.51905	8.53133	6.24418	14.2794	cis
17236604	Ntn4	netrin 4	57764	chr10	+	93.6407	93.7465	UNC18457442	chr10	93.6624	93.3031	93.9943	7.53667	8.22	6.21482	18.5993	cis
17236662	Nr2c1	nuclear receptor subfamily 2, group C, member 1	22025	chr10	+	94.1479	94.1958	UNC18466523	chr10	94.2004	93.1639	95.6041	7.49661	8.1833	6.28062	10.0381	cis
17236681	Ndufa12	NADH dehydrogenase (ubiquinone) 1 alpha subcomplex, 12	66414	chr10	+	94.199	94.2213	UNC18464134	chr10	94.0601	93.7093	94.5016	7.53521	8.10189	6.22098	21.8903	cis
17236688	Tmcc3	transmembrane and coiled coil domains 3	319880	chr10	+	94.3121	94.5909	UNC18472279	chr10	94.5295	93.637	95.2976	7.37009	8.26129	6.19829	8.30474	cis
17236747	4732465J04Rik	RIKEN cDNA 4732465J04 gene	414105	chr10	+	95.793	95.795	UNC18493662	chr10	96.1191	95.644	96.1808	7.62024	8.52147	6.21183	55.8242	cis
17453882	Srrt	serrate RNA effector molecule homolog (Arabidopsis)	83701	chr5	-	137.296	137.308	UNC10271875	chr5	137.784	137.16	138.189	7.43171	8.38333	6.24007	12.9051	cis
17453904	Trip6	thyroid hormone receptor interactor 6	22051	chr5	-	137.31	137.314	UNC10266040	chr5	137.344	136.801	139.206	7.38147	8.2496	6.20594	9.33711	cis
17454069	Mospd3	motile sperm domain containing 3	68929	chr5	-	137.597	137.601	UNC10271875	chr5	137.784	137.584	138.442	7.51088	8.26828	6.20893	12.8441	cis
17454121	Agfg2	ArfGAP with FG repeats 2	231801	chr5	-	137.651	137.685	UNC10271467	chr5	137.74	136.801	139.051	7.37118	8.39528	6.18404	9.14688	cis
17454179	Pilrb1	paired immunoglobin-like type 2 receptor beta 1	170741	chr5	-	137.853	137.857	JAX00598973	chr5	138.164	137.16	138.733	7.57484	8.35976	6.20922	45.2843	cis
17454187	Pilrb2	paired immunoglobin-like type 2 receptor beta 2	545812	chr5	-	137.866	137.871	UNC10265420	chr5	137.286	135.903	139.059	7.47413	8.17021	6.23199	15.8159	cis
17454193	Cyp3a13	cytochrome P450, family 3, subfamily a, polypeptide 13	13113	chr5	-	137.894	137.922	UNC10282837	chr5	138.739	138.337	138.778	7.47736	8.44426	6.17102	36.3567	cis
17454209	Gjc3	gap junction protein, gamma 3	118446	chr5	-	137.954	137.963	UNC10274358	chr5	138.014	137.664	138.733	7.62441	8.5806	6.21194	22.5993	cis
17454335	Zfp68	zinc finger protein 68	24135	chr5	-	138.605	138.62	UNC10281061	chr5	138.632	137.524	139.051	7.46581	8.23816	6.2038	18.8732	cis
17454398	Cox19	cytochrome c oxidase assembly protein 19	68033	chr5	-	139.336	139.345	JAX00136387	chr5	139.206	139.059	139.506	7.2678	8.27718	6.13701	19.4941	cis
17454416	Zfand2a	zinc finger, AN1-type domain 2A	100494	chr5	-	139.472	139.485	UNC10326560	chr5	141.99	139.275	142.581	7.32144	8.31761	6.18973	9.68554	cis
17454500	Tmem184a	transmembrane protein 184a	231832	chr5	-	139.804	139.82	UNC10328572	chr5	142.117	139.775	142.865	7.36272	8.1789	6.16478	11.4597	cis
17454546	Mrm2	mitochondrial rRNA methyltransferase 2	68017	chr5	-	140.328	140.331	JAX00599382	chr5	140.088	139.9	140.485	7.56029	8.34342	6.20864	23.853	cis
17454551	Snx8	sorting nexin 8	231834	chr5	-	140.34	140.389	UNC10306786	chr5	140.485	139.506	142.084	7.45847	8.50378	6.15409	8.6663	cis
17454654	Gm16035	predicted gene 16035	102632986	chr5	-	141.373	141.381	UNC10315611	chr5	141.229	139.958	142.709	7.36799	8.05713	6.19436	8.39925	cis
17454692	Mmd2	monocyte to macrophage differentiation-associated 2	75104	chr5	-	142.563	142.609	UNC10348231	chr5	143.543	142.024	143.601	7.54197	8.32071	6.19518	24.6601	cis
17454846	Zdhhc4	zinc finger, DHHC domain containing 4	72881	chr5	-	143.316	143.329	UNC10348231	chr5	143.543	141.99	143.799	7.37606	8.20796	6.15524	14.1382	cis
17454865	Rac1	RAS-related C3 botulinum substrate 1	19353	chr5	-	143.506	143.528	UNC10347893	chr5	143.513	139.865	146.9	7.50827	8.39706	6.13912	10.5401	cis
17454919	Ccz1	CCZ1 vacuolar protein trafficking and biogenesis associated	231874	chr5	-	143.988	144.015	UNC050432061	chr5	143.601	142.024	144.424	7.39181	8.20367	6.17206	12.3865	cis
17455006	Smurf1	SMAD specific E3 ubiquitin protein ligase 1	75788	chr5	-	144.878	144.966	JAX00600280	chr5	144.449	143.981	146.563	7.46256	8.21965	6.25215	16.7915	cis
17455071	Ptcd1	pentatricopeptide repeat domain 1	71799	chr5	-	145.147	145.167	UNC10382471	chr5	146.563	144.363	146.911	7.40585	8.17202	6.17291	8.57272	cis
17455193	Cyp3a25	cytochrome P450, family 3, subfamily a, polypeptide 25	56388	chr5	-	145.977	145.992	UNC10379453	chr5	146.272	144.363	146.674	7.46876	8.27488	6.21452	16.2675	cis
17455249	Gpr12	G-protein coupled receptor 12	14738	chr5	-	146.582	146.585	UNC10381311	chr5	146.409	146.272	146.807	7.58736	8.60668	6.29239	44.966	cis
17455274	Mtif3	mitochondrial translational initiation factor 3	76366	chr5	-	146.952	146.964	UNC10385644	chr5	146.731	146.335	147.264	7.40878	8.32817	6.23844	7.99417	cis
17455386	Slc46a3	solute carrier family 46, member 3	71706	chr5	-	147.879	147.895	UNC10404121	chr5	147.909	147.789	147.968	7.55541	8.61938	6.21425	19.7041	cis
17455431	Katnal1	katanin p60 subunit A-like 1	231912	chr5	-	148.872	148.995	UNC10424133	chr5	148.904	148.728	149.562	7.56505	8.43335	6.24132	14.1849	cis
17455476	Hmgb1	high mobility group box 1	15289	chr5	-	149.047	149.053	JAX00228369	chr5	149.09	148.501	151.734	7.47197	8.28606	6.21378	7.5273	cis
17455554	N4bp2l1	NEDD4 binding protein 2-like 1	100637	chr5	-	150.572	150.594	JAX00601576	chr5	150.423	149.045	151.734	7.49346	8.41422	6.2379	10.0132	cis
17455882	Ppp1r9a	protein phosphatase 1, regulatory (inhibitor) subunit 9A	243725	chr6	+	4.90301	5.16507	UNC10494097	chr6	5.8749	4.03411	7.34458	7.52869	8.54428	6.17775	12.8342	cis
17455903	Asb4	ankyrin repeat and SOCS box-containing 4	65255	chr6	+	5.39048	5.4315	UNC10484860	chr6	5.18505	3.37161	31.6795	7.60811	8.63162	6.19766	11.0185	cis
17455944	Sdhaf3	succinate dehydrogenase complex assembly factor 3	71238	chr6	+	6.95603	7.04091	JAX00602237	chr6	6.0377	4.93804	16.2819	7.53469	8.41313	6.28088	8.53357	cis
17455962	C1galt1	core 1 synthase, glycoprotein-N-acetylgalactosamine 3-beta-galactosyltransferase, 1	94192	chr6	+	7.84509	7.87184	UNC10518661	chr6	7.62973	4.93804	11.9536	7.3941	8.04795	6.20034	11.3521	cis
17455971	Mios	meiosis regulator for oocyte development	252875	chr6	+	8.20937	8.23567	UNC10495878	chr6	5.9951	4.12479	8.45444	7.42863	8.14153	6.23275	9.99721	cis
17455986	Umad1	UMAP1-MVP12 associated (UMA) domain containing 1	100036521	chr6	+	8.25929	8.45912	UNC10571218	chr6	12.1734	5.96342	13.2499	7.70703	8.44955	6.25286	14.7755	cis
17456001	Glcci1	glucocorticoid induced transcript 1	170772	chr6	+	8.5096	8.597	UNC10527151	chr6	8.1426	5.89414	8.49401	7.46294	8.57665	6.17445	25.5628	cis
17456074	1110019D14Rik	RIKEN cDNA 1110019D14 gene	76311	chr6	+	13.8715	14.0443	UNC10593586	chr6	13.7961	13.1973	15.2311	7.54688	8.65713	6.21461	20.2882	cis
17456131	Tes	testis derived transcript	21753	chr6	+	17.0652	17.1057	JAX00603874	chr6	16.8888	16.6972	17.5468	7.40758	8.1645	6.1765	11.8576	cis
17236800	Dcn	decorin	13179	chr10	+	97.4796	97.5181	UNC18505433	chr10	97.0095	96.9211	100	7.4786	8.53621	6.17398	14.9437	cis
17236811	Lum	lumican	17022	chr10	+	97.5655	97.5726	UNC18505433	chr10	97.0095	96.9211	98.9877	7.38065	8.21439	6.17431	8.90752	cis
17236878	Galnt4	polypeptide N-acetylgalactosaminyltransferase 4	14426	chr10	+	99.1082	99.1124	UNC18540087	chr10	99.5774	98.9287	108.041	7.37142	8.60672	6.17138	12.1808	cis
17236882	Dusp6	dual specificity phosphatase 6	67603	chr10	+	99.2633	99.2672	UNC18536677	chr10	99.3366	96.9211	107.338	7.51153	8.82827	6.21264	13.4325	cis
17236900	Kitl	kit ligand	17311	chr10	+	100.016	100.096	UNC18549098	chr10	100.162	99.9252	100.667	7.65472	8.545	6.2442	39.7146	cis
17456219	St7	suppression of tumorigenicity 7	64213	chr6	+	17.694	17.9428	UNC10649498	chr6	18.2435	17.5531	18.5423	7.28988	8.10388	6.13277	17.6739	cis
17456285	Lsm8	LSM8 homolog, U6 small nuclear RNA associated	76522	chr6	+	18.8486	18.854	UNC10639106	chr6	17.4445	16.2306	31.5923	7.42245	8.23914	6.21337	7.70711	cis
17456339	Cped1	cadherin-like and PC-esterase domain containing 1	214642	chr6	+	21.9867	22.2558	JAX00604530	chr6	20.6735	18.4908	27.3586	7.46124	8.65525	6.20416	14.1308	cis
17456485	Arf5	ADP-ribosylation factor 5	11844	chr6	+	28.4237	28.4266	UNC10788137	chr6	28.1959	27.2888	28.8172	7.55343	8.50801	6.21638	15.5686	cis
17456710	Tspan33	tetraspanin 33	232670	chr6	+	29.6945	29.7184	UNC10805904	chr6	29.7352	28.3093	31.8939	7.64098	8.43813	6.2259	16.8152	cis
17456721	Smo	smoothened, frizzled class receptor	319757	chr6	+	29.7357	29.7606	UNC10804422	chr6	29.5877	28.6713	31.1222	7.61254	8.60012	6.18346	40.1216	cis
17456974	2210408F21Rik	RIKEN cDNA 2210408F21 gene	73652	chr6	+	31.2204	31.3373	UNC10797107	chr6	28.9511	28.3093	33.0775	7.51806	8.92198	6.20051	20.0211	cis
17457063	Exoc4	exocyst complex component 4	20336	chr6	+	33.2491	33.9738	UNC060069380	chr6	34.1951	33.3333	35.4667	7.51089	8.26986	6.22732	12.3707	cis
17457122	Gm13855	predicted gene 13855	105242626	chr6	+	34.1792	34.1863	JAX00606666	chr6	33.8146	28.1959	35.0227	7.46229	8.18037	6.21726	12.0646	cis
17457143	Akr1b10	aldo-keto reductase family 1, member B10 (aldose reductase)	67861	chr6	+	34.3843	34.3967	backupUNC060070579	chr6	35.2958	33.7857	35.944	7.54989	8.74275	6.22017	10.3541	cis
17457171	Bpgm	2,3-bisphosphoglycerate mutase	12183	chr6	+	34.4762	34.5054	JAX00139621	chr6	34.1117	32.9583	35.4667	7.39677	8.18904	6.15818	9.18532	cis
17457184	Cald1	caldesmon 1	109624	chr6	+	34.5985	34.7744	UNC10859022	chr6	34.3156	34.1195	34.9571	7.51524	8.56063	6.20596	29.1318	cis
17457207	Agbl3	ATP/GTP binding protein-like 3	76223	chr6	+	34.7805	34.8579	UNC10854599	chr6	34.0402	33.143	36.7019	7.5807	8.4991	6.18739	8.25777	cis
17457297	1810058I24Rik	RIKEN cDNA 1810058I24 gene	67705	chr6	+	35.2529	35.2632	UNC10836833	chr6	32.5854	31.6795	36.4844	7.53405	8.26847	6.20495	9.89789	cis
17457310	Chrm2	cholinergic receptor, muscarinic 2, cardiac	243764	chr6	+	36.3882	36.5257	UNC10863202	chr6	34.5571	33.2192	37.14	7.62777	8.51606	6.23337	12.1697	cis
17457430	Fmc1	formation of mitochondrial complex V assembly factor 1	66117	chr6	+	38.5335	38.5394	UNC10915737	chr6	38.9426	37.9192	39.9351	7.53741	8.39847	6.2024	14.1908	cis
17457876	Gstk1	glutathione S-transferase kappa 1	76263	chr6	+	42.246	42.2504	UNC10951129	chr6	42.0789	41.7378	42.5257	7.4562	8.29946	6.18107	32.8775	cis
17237028	Rassf9	Ras association (RalGDS/AF-6) domain family (N-terminal) member 9	237504	chr10	+	102.512	102.546	UNC100117633	chr10	103.087	102.488	103.254	7.48084	8.44283	6.20218	64.4352	cis
17237084	Ccdc59	coiled-coil domain containing 59	52713	chr10	+	105.841	105.848	UNC18638636	chr10	105.975	105.382	107.338	7.47652	8.64328	6.17694	51.8608	cis
17458020	Arhgef5	Rho guanine nucleotide exchange factor (GEF) 5	54324	chr6	+	43.2657	43.2893	JAX00140268	chr6	42.7816	41.7378	43.6202	7.60253	8.47381	6.21155	17.4472	cis
17458112	Zfp398	zinc finger protein 398	272347	chr6	+	47.8357	47.8675	UNC11018236	chr6	47.0281	41.7378	48.7367	7.46509	8.11154	6.23811	12.5286	cis
17458150	Zfp956	zinc finger protein 956	101197	chr6	+	47.9558	47.9652	UNC11029764	chr6	48.198	41.5743	48.7367	7.59018	8.60128	6.21485	10.9794	cis
17458299	Zfp862-ps	zinc finger protein 862, pseudogene	58894	chr6	+	48.5044	48.5347	UNC11010607	chr6	46.4003	43.6427	48.9813	7.68928	8.63994	6.21597	10.4855	cis
17458308	Atp6v0e2	ATPase, H+ transporting, lysosomal V0 subunit E2	76252	chr6	+	48.5376	48.5415	UNC11032265	chr6	48.4765	48.2766	48.6835	7.46744	8.37156	6.17402	36.1964	cis
17458315	Lrrc61	leucine rich repeat containing 61	243371	chr6	+	48.5548	48.5703	UNC11032921	chr6	48.5297	48.4302	48.9813	7.65723	8.44396	6.16918	24.4825	cis
17458327	Repin1	replication initiator 1	58887	chr6	+	48.5939	48.5989	UNC11030573	chr6	48.2766	48.198	48.9341	7.54256	8.76772	6.18113	13.4308	cis
17458333	Zfp775	zinc finger protein 775	243372	chr6	+	48.6132	48.6231	UNC11026066	chr6	47.8716	47.2508	50.417	7.52679	8.47022	6.18835	7.94542	cis
17458355	Gimap9	GTPase, IMAP family member 9	317758	chr6	+	48.6761	48.6791	UNC11037282	chr6	48.864	47.2689	54.0677	7.63768	8.49224	6.26522	11.7478	cis
17458465	Ccdc126	coiled-coil domain containing 126	57895	chr6	+	49.3194	49.3415	UNC060079088	chr6	49.8241	49.2052	50.9321	7.58716	8.42766	6.30939	19.6351	cis
17458573	Snx10	sorting nexin 10	71982	chr6	+	51.5239	51.5903	UNC11078268	chr6	51.6738	51.0425	53.5706	7.53071	8.77198	6.16394	9.11724	cis
17458692	Chn2	chimerin 2	69993	chr6	+	54.0399	54.3009	UNC11100952	chr6	53.5762	53.0732	55.4701	7.49046	8.47243	6.22913	8.16474	cis
17458723	Wipf3	WAS/WASL interacting protein family, member 3	330319	chr6	+	54.4297	54.5023	UNC11123637	chr6	55.109	54.0677	55.2591	7.42157	8.63629	6.2046	15.4944	cis
17458734	Plekha8	pleckstrin homology domain containing, family A (phosphoinositide binding specific) member 8	231999	chr6	+	54.5951	54.6452	UNC11120788	chr6	54.9029	54.4372	55.4247	7.43634	8.00647	6.15545	29.647	cis
17458759	Znrf2	zinc and ring finger 2	387524	chr6	+	54.8173	54.893	UNC11123637	chr6	55.109	54.0573	58.7343	7.52453	8.54315	6.19584	15.244	cis
17458990	Lancl2	LanC (bacterial lantibiotic synthetase component C)-like 2	71835	chr6	+	57.7027	57.7391	backupUNC061075925	chr6	58.8637	54.4372	64.5442	7.49879	8.55925	6.15794	8.38143	cis
17459260	E230016M11Rik	RIKEN cDNA E230016M11 gene	320172	chr6	+	67.0366	67.0805	UNC11268860	chr6	67.0215	65.4763	72.1005	7.56255	8.33826	6.19193	12.1088	cis
17459398	Igk	immunoglobulin kappa chain complex	243469	chr6	+	70.6079	70.6079	JAX00613183	chr6	71.4262	53.7018	71.7891	7.65002	8.51947	6.29802	8.80154	cis
17459490	Rnf103	ring finger protein 103	22644	chr6	+	71.494	71.5249	UNC061716948	chr6	67.7615	64.6192	77.1829	7.49118	8.34078	6.19403	7.9429	cis
17459504	Chmp3	charged multivesicular body protein 3	66700	chr6	+	71.5438	71.5825	JAX00613183	chr6	71.4262	70.7906	72.7044	7.62757	8.38223	6.2032	10.3938	cis
17459520	Reep1	receptor accessory protein 1	52250	chr6	+	71.7076	71.8102	UNC060508303	chr6	70.7906	67.1338	72.735	7.29309	8.14267	6.12167	9.98325	cis
17459530	Immt	inner membrane protein, mitochondrial	76614	chr6	+	71.8314	71.8773	UNC11335538	chr6	71.6109	70.7906	75.1719	7.4524	8.32976	6.16408	10.4326	cis
17459550	Polr1a	polymerase (RNA) I polypeptide A	20019	chr6	+	71.9091	71.9788	UNC11340746	chr6	72.0198	66.5336	76.9128	7.52755	8.6712	6.18064	17.6649	cis
17459614	0610030E20Rik	RIKEN cDNA 0610030E20 gene	68364	chr6	+	72.3473	72.3526	UNC11343417	chr6	72.2105	70.7906	72.7044	7.43996	8.1347	6.1671	18.7	cis
17459621	Tmem150a	transmembrane protein 150A	232086	chr6	+	72.3554	72.3597	UNC11349701	chr6	72.6359	71.6109	80.7219	7.28734	8.34271	6.1684	7.96735	cis
17459634	Ggcx	gamma-glutamyl carboxylase	56316	chr6	+	72.4143	72.4303	JAX00142607	chr6	74.2791	71.3312	76.4639	7.53217	8.74404	6.2129	8.2148	cis
17237186	E2f7	E2F transcription factor 7	52679	chr10	+	110.745	110.787	UNC18713457	chr10	110.903	110.435	111.846	7.58942	8.18449	6.22705	32.6336	cis
17237208	Csrp2	cysteine and glycine-rich protein 2	13008	chr10	+	110.92	110.94	JAX00298684	chr10	110.445	109.856	111.392	7.50686	8.31508	6.257	28.5039	cis
17237247	Bbs10	Bardet-Biedl syndrome 10 (human)	71769	chr10	+	111.299	111.302	JAX00022321	chr10	110.998	110.596	111.517	7.52765	8.34563	6.21331	14.3261	cis
17459826	Eva1a	eva-1 homolog A (C. elegans)	232146	chr6	+	82.041	82.0925	UNC11487129	chr6	82.2748	77.3505	86.0852	7.35652	8.20623	6.1473	8.66837	cis
17459870	Loxl3	lysyl oxidase-like 3	16950	chr6	+	83.0355	83.0512	UNC060132871	chr6	82.5286	79.3593	85.1048	7.54075	8.33897	6.20445	8.10768	cis
17459888	Aup1	ancient ubiquitous protein 1	11993	chr6	+	83.0548	83.0576	UNC11497618	chr6	82.9411	80.4393	83.5546	7.41883	8.51594	6.21865	11.012	cis
17459903	Dqx1	DEAQ RNA-dependent ATPase	93838	chr6	+	83.0579	83.0666	UNC11478679	chr6	81.7559	80.4393	83.5546	7.39144	8.19468	6.19743	20.3757	cis
17459947	Mrpl53	mitochondrial ribosomal protein L53	68499	chr6	+	83.1091	83.1099	JAX00143277	chr6	83.2009	82.5286	83.5546	7.48403	8.71966	6.2186	32.1366	cis
17460023	Slc4a5	solute carrier family 4, sodium bicarbonate cotransporter, member 5	232156	chr6	+	83.2199	83.304	UNC11502976	chr6	83.4159	80.503	83.6453	7.44769	8.16449	6.23824	16.9143	cis
17460133	Nagk	N-acetylglucosamine kinase	56174	chr6	+	83.795	83.8031	UNC11507910	chr6	83.8076	83.5546	84.6304	7.44	8.4143	6.23947	22.6458	cis
17460185	Dysf	dysferlin	26903	chr6	+	84.0088	84.2109	UNC11495739	chr6	82.8186	82.6095	85.1048	7.56215	8.48288	6.24712	37.3284	cis
17460342	Tprkb	Tp53rk binding protein	69786	chr6	+	85.9158	85.93	UNC11523877	chr6	85.8538	85.1866	86.0852	7.50499	8.64381	6.22691	15.9483	cis
17460494	Nfu1	NFU1 iron-sulfur cluster scaffold	56748	chr6	+	87.0098	87.0284	UNC11536768	chr6	86.9827	86.1014	87.7551	7.46395	8.25758	6.22061	17.198	cis
17460558	Efcc1	EF hand and coiled-coil domain containing 1	58229	chr6	+	87.731	87.7557	UNC11530131	chr6	86.392	81.5931	88.2119	7.47556	8.18538	6.20451	12.9253	cis
17460879	Hdac11	histone deacetylase 11	232232	chr6	+	91.1567	91.1742	JAX00617425	chr6	91.1976	72.4281	92.531	7.53395	8.55007	6.19617	10.143	cis
17460915	1810044D09Rik	RIKEN cDNA 1810044D09 gene	69798	chr6	+	91.441	91.4417	JAX00617731	chr6	92.5998	91.4016	92.7102	7.51915	8.20172	6.2025	8.7806	cis
17461082	Slc25a26	solute carrier family 25 (mitochondrial carrier, phosphate carrier), member 26	67582	chr6	+	94.5003	94.6045	UNC11612100	chr6	93.6463	93.2591	94.8996	7.5385	8.25235	6.22309	14.9231	cis
17461433	Edem1	ER degradation enhancer, mannosidase alpha-like 1	192193	chr6	+	108.829	108.859	UNC11799346	chr6	107.48	103.819	110.314	7.4429	8.2784	6.21455	11.5338	cis
17461499	Thumpd3	THUMP domain containing 3	14911	chr6	+	113.046	113.068	UNC11879437	chr6	112.974	111.511	119.145	7.54244	8.19618	6.20929	8.42484	cis
17461677	Jagn1	jagunal homolog 1	67767	chr6	+	113.443	113.448	UNC11891083	chr6	113.979	112.943	114.009	7.45483	8.29822	6.21862	11.1381	cis
17461703	Il17rc	interleukin 17 receptor C	171095	chr6	+	113.471	113.483	UNC11884415	chr6	113.443	112.834	113.935	7.59484	8.58158	6.19141	17.5187	cis
17461793	Brk1	BRICK1, SCAR/WAVE actin-nucleating complex subunit	101314	chr6	+	113.605	113.617	UNC11891336	chr6	113.994	112.943	115.31	7.46833	8.4323	6.21142	8.26351	cis
17461828	Tatdn2	TatD DNase domain containing 2	381801	chr6	+	113.697	113.711	UNC11891600	chr6	114.016	113.348	115.261	7.44147	8.37716	6.19298	13.1755	cis
17461897	Atg7	autophagy related 7	74244	chr6	+	114.647	114.86	UNC11891600	chr6	114.016	113.939	115.273	7.57757	8.75725	6.23869	19.3333	cis
17461942	Pparg	peroxisome proliferator activated receptor gamma	19016	chr6	+	115.361	115.49	JAX00623141	chr6	115.31	115.195	116.842	7.41483	8.72223	6.19151	8.85845	cis
17461954	Tsen2	tRNA splicing endonuclease subunit 2	381802	chr6	+	115.548	115.578	UNC11907015	chr6	115.518	114.009	116.842	7.52438	8.58462	6.19496	8.69259	cis
17461968	Mkrn2	makorin, ring finger protein, 2	67027	chr6	+	115.602	115.618	JAX00623246	chr6	115.751	115.273	116.842	7.52894	8.21528	6.21256	10.0806	cis
17462059	Washc2	WASH complex subunit 2	28006	chr6	+	116.208	116.263	UNC11911281	chr6	115.849	115.706	116.71	7.53966	8.54822	6.18959	22.0379	cis
17462092	Zfand4	zinc finger, AN1-type domain 4	67492	chr6	+	116.264	116.33	UNC060181882	chr6	115.641	115.273	116.842	7.31314	8.36671	6.15038	12.5428	cis
17462113	43532	membrane-associated ring finger (C3HC4) 8	71779	chr6	+	116.338	116.408	UNC11921952	chr6	116.806	114.002	116.943	7.53368	8.32083	6.19808	8.41734	cis
17237356	Gm15723	predicted gene 15723	102633245	chr10	+	114.802	114.817	JAX00299397	chr10	114.789	114.602	115.061	7.58956	8.4463	6.20888	23.4718	cis
17237451	Ptprb	protein tyrosine phosphatase, receptor type, B	19263	chr10	+	116.277	116.388	UNC18797676	chr10	116.808	114.211	117.973	7.38702	8.21777	6.14675	12.218	cis
17462291	Rad52	RAD52 homolog, DNA repair protein	19365	chr6	+	119.903	119.923	UNC11955735	chr6	119.145	78.5946	120.642	7.53582	8.24601	6.24541	8.25997	cis
17462430	Tuba8	tubulin, alpha 8	53857	chr6	+	121.211	121.227	UNC11980657	chr6	121.242	120.942	122.581	7.68703	8.71007	6.1565	27.052	cis
17462451	Slc6a13	solute carrier family 6 (neurotransmitter transporter, GABA), member 13	14412	chr6	+	121.3	121.338	backupUNC060190810	chr6	120.971	120.892	122.956	7.54053	8.47064	6.18213	12.7173	cis
17462529	Mug1	murinoglobulin 1	17836	chr6	+	121.84	121.889	backupUNC060312698	chr6	121.556	120.777	122.53	7.68973	8.44482	6.25283	20.4673	cis
17462566	Mug2	murinoglobulin 2	17837	chr6	+	122.025	122.08	UNC060193544	chr6	122.436	121.625	122.506	7.52275	8.31342	6.17568	62.9264	cis
17462602	Gm10319	murinoglobulin pseudogene	381806	chr6	+	122.137	122.151	UNC11993668	chr6	122.499	121.556	123.254	7.58017	8.10645	6.21192	38.8788	cis
17462608	Mug-ps1	murinoglobulin, pseudogene 1	17835	chr6	+	122.208	122.244	UNC11993190	chr6	122.458	121.487	122.581	7.6012	8.77462	6.24641	29.4661	cis
17462778	Clec4b2	C-type lectin domain family 4, member b2	381809	chr6	+	123.173	123.205	JAX00146263	chr6	123.256	120.604	124.439	7.5926	8.20621	6.25564	8.87442	cis
17462788	Clec4n	C-type lectin domain family 4, member n	56620	chr6	+	123.23	123.247	UNC11997182	chr6	122.769	122.559	124.707	7.44137	8.27263	6.17339	18.44	cis
17462975	Mlf2	myeloid leukemia factor 2	30853	chr6	+	124.931	124.936	UNC12018638	chr6	125.218	124.439	125.552	7.38818	8.30259	6.19027	7.53668	cis
17462987	Pianp	PILR alpha associated neural protein	319352	chr6	+	124.997	125.003	UNC12018638	chr6	125.218	123.936	125.552	7.33798	8.2132	6.19665	19.2599	cis
17463031	Acrbp	proacrosin binding protein	54137	chr6	+	125.05	125.063	UNC12013897	chr6	124.762	122.757	125.631	7.41042	8.29122	6.2243	10.7898	cis
17463108	Nop2	NOP2 nucleolar protein	110109	chr6	+	125.132	125.145	UNC11983610	chr6	121.487	120.604	125.287	7.42477	8.46975	6.17957	9.93108	cis
17463184	Tnfrsf1a	tumor necrosis factor receptor superfamily, member 1a	21937	chr6	+	125.349	125.362	UNC12019400	chr6	125.287	125.172	125.565	7.40146	8.29017	6.1681	19.6508	cis
17463434	Gm10069	predicted gene 10069	791299	chr6	+	128.439	128.503	JAX00146645	chr6	128.57	127.245	133.937	7.42674	8.53835	6.23938	10.5538	cis
17463443	Clec2h	C-type lectin domain family 2, member h	94071	chr6	+	128.662	128.677	JAX00146645	chr6	128.57	128.478	128.767	7.44927	8.24611	6.23295	66.6138	cis
17463478	BC064078	cDNA sequence BC064078	408064	chr6	+	128.993	129.006	UNC12059209	chr6	128.411	128.118	129.405	7.52375	8.25873	6.18646	11.6268	cis
17463501	Clec2d	C-type lectin domain family 2, member d	93694	chr6	+	129.181	129.186	JAX00625957	chr6	129.344	128.478	131.607	7.38983	8.34545	6.24726	16.3667	cis
17463520	Clec1b	C-type lectin domain family 1, member b	56760	chr6	+	129.397	129.405	JAX00625957	chr6	129.344	128.253	131.607	7.31369	8.27936	6.13162	20.5463	cis
17463650	Smim10l1	small integral membrane protein 10 like 1	381820	chr6	+	133.105	133.107	UNC12128122	chr6	133.757	129.134	133.937	7.35544	8.07368	6.23506	19.872	cis
17463727	Apold1	apolipoprotein L domain containing 1	381823	chr6	+	134.982	134.987	UNC12145137	chr6	134.779	134.273	135.793	7.47381	8.22246	6.19437	7.64163	cis
17463761	Fam234b	family with sequence similarity 234, member B	74525	chr6	+	135.198	135.244	UNC12149101	chr6	135.051	134.429	135.267	7.49477	8.29154	6.17299	22.7507	cis
17463781	Emp1	epithelial membrane protein 1	13730	chr6	+	135.363	135.383	UNC12150316	chr6	135.107	128.253	135.831	7.47463	8.53208	6.17673	7.8113	cis
17463829	Atf7ip	activating transcription factor 7 interacting protein	54343	chr6	+	136.608	136.61	UNC12173734	chr6	136.468	136.035	136.67	7.36416	8.2886	6.17408	52.5	cis
17463833	H2afj	H2A histone family, member J	232440	chr6	+	136.808	136.81	JAX00627714	chr6	136.839	136.666	137.372	7.71433	8.45314	6.26694	22.0671	cis
17463837	BC049715	cDNA sequence BC049715	320135	chr6	+	136.829	136.841	JAX00627777	chr6	137.03	135.793	137.372	7.39479	8.03704	6.09907	8.14673	cis
17463883	Strap	serine/threonine kinase receptor associated protein	20901	chr6	+	137.735	137.751	UNC12199506	chr6	137.965	136.424	139.307	7.43707	8.40763	6.22649	8.90526	cis
17463898	Dera	deoxyribose-phosphate aldolase (putative)	232449	chr6	+	137.778	137.838	UNC12197430	chr6	137.813	136.711	138.402	7.49883	8.11616	6.22079	16.9724	cis
17463909	Mgst1	microsomal glutathione S-transferase 1	56615	chr6	+	138.14	138.157	JAX00628210	chr6	138.483	137.726	138.762	7.69775	8.53496	6.27142	23.7654	cis
17463930	Pik3c2g	phosphatidylinositol-4-phosphate 3-kinase catalytic subunit type 2 gamma	18705	chr6	+	139.616	139.958	UNC12223145	chr6	139.555	139.104	139.946	7.63732	8.57281	6.2188	24.7902	cis
17237547	Cpm	carboxypeptidase M	70574	chr10	+	117.63	117.687	UNC18784447	chr10	115.892	115.816	117.973	7.48944	8.16734	6.23868	13.6339	cis
17237564	Mdm1	transformed mouse 3T3 cell double minute 1	17245	chr10	+	118.142	118.168	UNC18817138	chr10	118.287	117.973	119.105	7.55247	8.3472	6.1697	7.61891	cis
17237647	Gm38500	predicted gene, 38500	102637719	chr10	+	120.202	120.225	UNC18841267	chr10	119.839	119.152	122.744	7.46495	8.15859	6.21875	10.1339	cis
17237701	Wif1	Wnt inhibitory factor 1	24117	chr10	+	121.034	121.1	UNC18856790	chr10	120.906	120.879	122.701	7.65528	8.64612	6.27985	12.8842	cis
17464010	Aebp2	AE binding protein 2	11569	chr6	+	140.623	140.678	UNC12234808	chr6	140.163	135.793	140.768	7.34737	8.31954	6.19286	11.1135	cis
17464063	Slco1c1	solute carrier organic anion transporter family, member 1c1	58807	chr6	+	141.524	141.57	UNC12237190	chr6	140.295	139.839	141.841	7.61953	8.68772	6.26645	8.99777	cis
17464146	Cmas	cytidine monophospho-N-acetylneuraminic acid synthetase	12764	chr6	+	142.757	142.776	UNC12272195	chr6	142.665	141.322	142.868	7.56489	8.42369	6.27683	12.9771	cis
17464165	Etnk1	ethanolamine kinase 1	75320	chr6	+	143.167	143.207	UNC12244891	chr6	140.842	139.009	142.478	7.3507	8.24393	6.1806	9.95429	cis
17464197	Sox5os4	SRY (sex determining region Y)-box 5, opposite strand 4	102633928	chr6	+	144.721	144.76	UNC12299801	chr6	144.556	144.216	145.398	7.39779	8.26492	6.15269	8.47519	cis
17464238	Etfrf1	electron transfer flavoprotein regulatory factor 1	67636	chr6	+	145.211	145.217	UNC12309135	chr6	145.209	143.859	146.414	7.45744	8.1314	6.24791	10.5585	cis
17464303	Med21	mediator complex subunit 21	108098	chr6	+	146.643	146.65	UNC12336065	chr6	146.8	146.384	147.374	7.53052	8.328	6.1337	26.4348	cis
17464316	Stk38l	serine/threonine kinase 38 like	232533	chr6	+	146.758	146.778	UNC12332564	chr6	146.579	146.416	147.678	7.60002	8.63635	6.23392	17.6537	cis
17464331	Arntl2	aryl hydrocarbon receptor nuclear translocator-like 2	272322	chr6	+	146.803	146.833	UNC12335235	chr6	146.74	146.145	146.993	7.42363	8.22632	6.19199	14.3438	cis
17464367	Ppfibp1	PTPRF interacting protein, binding protein 1 (liprin beta 1)	67533	chr6	+	146.939	147.031	UNC060286247	chr6	146.939	146.382	146.993	7.47322	8.4311	6.19362	10.0172	cis
17464404	Mrps35	mitochondrial ribosomal protein S35	232536	chr6	+	147.043	147.071	UNC12347759	chr6	147.565	146.8	147.678	7.578	8.28481	6.19205	8.31553	cis
17464417	Klhl42	kelch-like 42	232539	chr6	+	147.091	147.112	UNC12343227	chr6	147.212	146.431	147.678	7.4807	8.51426	6.21049	14.0449	cis
17464573	Tfpi2	tissue factor pathway inhibitor 2	21789	chr6	-	3.96272	3.96831	JAX00601915	chr6	4.03411	3.37161	4.77571	7.49593	8.14379	6.16312	20.9334	cis
17464580	Bet1	Bet1 golgi vesicular membrane trafficking protein	12068	chr6	-	4.07744	4.08697	UNC10474750	chr6	4.2547	3.37161	5.01979	7.41619	8.20744	6.23076	8.23835	cis
17464614	Pon1	paraoxonase 1	18979	chr6	-	5.16816	5.19391	UNC060013101	chr6	8.25033	4.99775	11.5619	8.01425	9.27268	6.37309	8.0978	cis
17464626	Pon3	paraoxonase 3	269823	chr6	-	5.22092	5.2562	backupUNC061649280	chr6	5.6871	5.18505	5.8749	7.51468	8.4963	6.2144	46.0042	cis
17464638	Pon2	paraoxonase 2	330260	chr6	-	5.26448	5.29835	UNC10490204	chr6	5.60426	5.18505	5.96342	7.83194	8.66332	6.30187	60.1821	cis
17464692	Sem1	SEM1, 26S proteasome complex subunit	20422	chr6	-	6.55836	6.57866	JAX00137514	chr6	5.79456	4.03411	28.4381	7.52799	8.26261	6.16974	8.26726	cis
17464718	Asns	asparagine synthetase	27053	chr6	-	7.6752	7.69323	UNC10506939	chr6	6.74706	5.62898	13.0397	7.71161	8.73803	6.29187	11.1149	cis
17464776	Rpa3	replication protein A3	68240	chr6	-	8.2567	8.25914	UNC10517210	chr6	7.51475	5.79456	7.96967	7.51977	8.35437	6.21457	15.9743	cis
17464803	Ica1	islet cell autoantigen 1	15893	chr6	-	8.63061	8.77847	UNC10532819	chr6	8.50818	8.45444	10.0415	7.29529	8.20406	6.11515	63.2357	cis
17464836	Ndufa4	NADH dehydrogenase (ubiquinone) 1 alpha subcomplex, 4	17992	chr6	-	11.9004	11.9074	UNC10577277	chr6	12.6079	8.45444	13.995	7.61024	8.66063	6.21197	9.61881	cis
17464850	Thsd7a	thrombospondin, type I, domain containing 7A	330267	chr6	-	12.3137	12.7488	UNC10597216	chr6	14.05	11.3654	17.2982	7.42367	8.27805	6.13977	16.2633	cis
17464901	Tmem168	transmembrane protein 168	101118	chr6	-	13.5815	13.608	UNC10613413	chr6	15.4496	5.3013	16.2306	7.62143	8.58075	6.24481	11.9521	cis
17464934	2610001J05Rik	RIKEN cDNA 2610001J05 gene	66520	chr6	-	13.8682	13.8715	JAX00603670	chr6	15.5696	12.1047	22.8938	7.52798	8.18737	6.22033	10.6762	cis
17465044	Tspan12	tetraspanin 12	269831	chr6	-	21.7718	21.8525	JAX00604722	chr6	22.012	20.9317	23.2059	7.54037	8.71359	6.23009	10.4211	cis
17465062	Fam3c	family with sequence similarity 3, member C	27999	chr6	-	22.3072	22.3562	UNC10687366	chr6	20.8051	18.3799	23.2059	7.40568	8.25711	6.16098	12.1937	cis
17465115	Cadps2	Ca2+-dependent activator protein for secretion 2	320405	chr6	-	23.2635	23.8393	UNC10717640	chr6	22.8687	22.4632	27.583	7.44946	8.53104	6.21733	10.1876	cis
17465212	Wasl	Wiskott-Aldrich syndrome-like (human)	73178	chr6	-	24.6142	24.6649	UNC10741265	chr6	24.6697	23.8033	24.7466	7.52323	8.63607	6.17378	10.5595	cis
17465246	Pot1a	protection of telomeres 1A	101185	chr6	-	25.744	25.8092	UNC10749955	chr6	25.286	23.855	28.8172	7.41345	8.3936	6.1875	12.937	cis
17465272	Grm8	glutamate receptor, metabotropic 8	14823	chr6	-	27.2752	28.1352	UNC10784417	chr6	27.9014	27.2925	27.9512	7.40045	8.33857	6.18571	50.2694	cis
17465310	Gcc1	golgi coiled coil 1	74375	chr6	-	28.4162	28.4284	UNC10793465	chr6	28.5811	27.9014	29.5877	7.46096	8.44814	6.24165	9.32403	cis
17465341	Rbm28	RNA binding motif protein 28	68272	chr6	-	29.1241	29.165	UNC060061502	chr6	29.1673	28.887	29.7097	7.62997	8.31663	6.29773	22.8435	cis
17465407	Kcp	kielin/chordin-like protein	333088	chr6	-	29.4821	29.5079	JAX00605888	chr6	29.7097	28.1959	30.7253	7.59249	8.42898	6.21361	15.7006	cis
17465449	Tnpo3	transportin 3	320938	chr6	-	29.5413	29.6095	UNC10804422	chr6	29.5877	24.7683	31.4635	7.55757	8.30402	6.22436	20.793	cis
17465557	Copg2	coatomer protein complex, subunit gamma 2	54160	chr6	-	30.7482	30.8956	UNC10836273	chr6	32.5393	25.626	33.0826	7.5106	8.41881	6.21101	7.60306	cis
17465740	3110062M04Rik	RIKEN cDNA 3110062M04 gene	78412	chr6	-	34.8723	34.8781	UNC10868681	chr6	34.989	34.7379	35.0227	7.43415	8.56606	6.18076	30.5019	cis
17465805	Slc13a4	solute carrier family 13 (sodium/sulfate symporters), member 4	243755	chr6	-	35.268	35.3081	UNC10856334	chr6	34.1604	27.9014	35.944	7.51461	8.34129	6.17523	8.8094	cis
17465824	Fam180a	family with sequence similarity 180, member A	208164	chr6	-	35.3129	35.3261	UNC10878493	chr6	35.8789	34.1951	38.2274	7.5283	8.49683	6.24147	8.25831	cis
17465865	Dgki	diacylglycerol kinase, iota	320127	chr6	-	36.8471	37.3001	UNC10896209	chr6	37.2014	37.1718	38.2274	7.56791	8.46074	6.23372	22.8571	cis
17465942	Atp6v0a4	ATPase, H+ transporting, lysosomal V0 subunit A4	140494	chr6	-	38.0485	38.0969	UNC10905864	chr6	38.0264	37.6088	38.2274	7.72527	9.16498	6.4177	16.7959	cis
17466003	Zc3hav1	zinc finger CCCH type, antiviral 1	78781	chr6	-	38.3061	38.3544	JAX00139986	chr6	38.9724	33.9378	68.009	7.49258	8.30973	6.20929	8.43272	cis
17466101	Slc37a3	solute carrier family 37 (glycerol-3-phosphate transporter), member 3	72144	chr6	-	39.3363	39.367	UNC10909095	chr6	38.2432	38.1855	40.1484	7.494	8.53831	6.16669	11.6982	cis
17466168	Braf	Braf transforming gene	109880	chr6	-	39.6098	39.6883	UNC10920601	chr6	39.3558	38.9724	39.8849	7.58672	8.41487	6.26664	17.6458	cis
17237751	BC048403	cDNA sequence BC048403	270802	chr10	+	121.74	121.753	UNC18875120	chr10	122.051	120.894	122.781	7.5395	8.38794	6.22783	11.9159	cis
17237767	Ppm1h	protein phosphatase 1H (PP2C domain containing)	319468	chr10	+	122.679	122.945	UNC18842863	chr10	119.919	118.402	122.744	7.37883	8.1315	6.20963	7.62649	cis
17237787	Fam19a2	family with sequence similarity 19, member A2	268354	chr10	+	123.264	123.74	UNC18899775	chr10	123.538	122.884	125.371	7.62296	8.42065	6.29242	12.2592	cis
17237876	Mettl1	methyltransferase like 1	17299	chr10	+	127.042	127.046	UNC18953070	chr10	126.889	124.046	127.592	7.42376	8.40322	6.23635	10.39	cis
17237899	Cdk4	cyclin-dependent kinase 4	12567	chr10	+	127.064	127.067	JAX00302073	chr10	127.069	123.488	127.826	7.6678	8.8046	6.24869	7.89527	cis
17237915	Agap2	ArfGAP with GTPase domain, ankyrin repeat and PH domain 2	216439	chr10	+	127.079	127.093	UNC18950326	chr10	126.729	125.59	127.119	7.42477	8.3142	6.15827	14.5257	cis
17237937	B4galnt1	beta-1,4-N-acetyl-galactosaminyl transferase 1	14421	chr10	+	127.165	127.172	UNC18956273	chr10	127.119	127.085	127.55	8.44823	9.95384	6.46277	47.923	cis
17466195	Mrps33	mitochondrial ribosomal protein S33	14548	chr6	-	39.8019	39.811	UNC10921060	chr6	39.4187	39.2694	40.7158	7.52989	8.13365	6.23725	11.2119	cis
17466204	E330009J07Rik	RIKEN cDNA E330009J07 gene	243780	chr6	-	40.4032	40.436	UNC10933004	chr6	40.4601	39.488	40.7982	7.53104	8.83905	6.19206	15.9808	cis
17466441	Tcaf2	TRPM8 channel-associated factor 2	232748	chr6	-	42.6235	42.6452	UNC10946941	chr6	41.7378	40.8246	43.6427	7.45245	8.13663	6.23328	22.5245	cis
17466452	Tcaf1	TRPM8 channel-associated factor 1	77574	chr6	-	42.6689	42.71	UNC10992143	chr6	45.1649	40.64	47.2499	7.57709	8.49528	6.23257	11.6242	cis
17466488	Tpk1	thiamine pyrophosphokinase	29807	chr6	-	43.3462	43.6663	JAX00608351	chr6	43.6202	42.3514	46.4003	7.54798	8.40753	6.20386	11.6161	cis
17466507	Ezh2	enhancer of zeste 2 polycomb repressive complex 2 subunit	14056	chr6	-	47.5305	47.5953	UNC11023614	chr6	47.4314	46.9978	48.9813	7.82155	9.70988	6.29367	9.5862	cis
17466532	Pdia4	protein disulfide isomerase associated 4	12304	chr6	-	47.7963	47.8135	JAX00140721	chr6	48.9341	48.7367	50.9474	7.68093	8.58773	6.26331	18.2155	cis
17466599	Rarres2	retinoic acid receptor responder (tazarotene induced) 2	71660	chr6	-	48.5697	48.5727	JAX00140696	chr6	48.5965	43.874	48.9813	7.41572	8.64587	6.2064	14.0812	cis
17466606	Gimap6	GTPase, IMAP family member 6	231931	chr6	-	48.7019	48.7082	UNC11036858	chr6	48.8305	48.2766	80.503	7.48467	8.39324	6.23653	10.0295	cis
17466670	Gsdme	gasdermin E	54722	chr6	-	50.1901	50.2637	UNC11064819	chr6	50.8059	48.864	51.1335	7.5301	8.26481	6.17062	21.2875	cis
17466723	Cycs	cytochrome c, somatic	13063	chr6	-	50.5626	50.5665	UNC11082579	chr6	52.0299	50.417	54.2232	7.5186	8.24546	6.20764	7.55663	cis
17466729	4921507P07Rik	RIKEN cDNA 4921507P07 gene	70821	chr6	-	50.5733	50.5966	UNC11068342	chr6	51.0139	50.1921	51.0831	7.47963	8.60544	6.13869	29.9921	cis
17466783	Skap2	src family associated phosphoprotein 2	54353	chr6	-	51.8592	52.0125	UNC11073109	chr6	51.3303	48.864	52.0927	7.37396	8.43161	6.19244	9.47965	cis
17466921	Jazf1	JAZF zinc finger 1	231986	chr6	-	52.7685	53.0685	UNC11084602	chr6	52.2187	52.0299	53.2179	7.49646	8.44523	6.17647	14.2978	cis
17466996	Fkbp14	FK506 binding protein 14	231997	chr6	-	54.5789	54.5973	UNC11131802	chr6	55.7022	54.4372	56.1279	7.50827	8.2232	6.19297	17.1179	cis
17467031	Ggct	gamma-glutamyl cyclotransferase	110175	chr6	-	54.9836	54.9929	UNC11108920	chr6	54.1274	53.7018	55.2591	7.41336	8.04302	6.27287	11.8966	cis
17467062	Inmt	indolethylamine N-methyltransferase	21743	chr6	-	55.1706	55.175	UNC11124460	chr6	55.166	54.4372	55.2591	7.70143	8.58797	6.35434	20.3916	cis
17467108	Lsm5	LSM5 homolog, U6 small nuclear RNA and mRNA degradation associated	66373	chr6	-	56.7012	56.7047	UNC11146472	chr6	56.6349	55.4247	64.0776	7.34611	8.09626	6.20757	9.65096	cis
17467128	Nt5c3	5'-nucleotidase, cytosolic III	107569	chr6	-	56.8825	56.9237	UNC11138429	chr6	56.1279	54.9613	60.3781	7.39805	8.4117	6.14401	9.94192	cis
17467166	Pyurf	Pigy upstream reading frame	66459	chr6	-	57.6858	57.6921	UNC11144399	chr6	56.5256	55.3174	58.7343	7.48412	8.21384	6.18947	39.0224	cis
17238054	Ndufa4l2	NADH dehydrogenase (ubiquinone) 1 alpha subcomplex, 4-like 2	407790	chr10	+	127.515	127.517	UNC18962917	chr10	127.745	126.865	128.687	7.52537	8.46352	6.27695	9.93481	cis
17238064	Stat6	signal transducer and activator of transcription 6	20852	chr10	+	127.643	127.661	UNC18963539	chr10	127.808	127.637	128.383	7.41476	8.3081	6.14558	8.46422	cis
17238162	Rdh9	retinol dehydrogenase 9	103142	chr10	+	127.782	127.792	UNC18963539	chr10	127.808	127.56	128.687	7.4197	8.30515	6.17188	16.4049	cis
17238172	Rdh16	retinol dehydrogenase 16	19683	chr10	+	127.814	127.816	UNC18962046	chr10	127.644	127.56	128.687	7.69529	8.79698	6.23509	17.8324	cis
17467537	LOC637260	Ig kappa chain V-IV region B17 precursor-like	637260	chr6	-	70.3149	70.3151	UNC11310298	chr6	69.737	65.7803	71.8127	7.60926	8.76837	6.24549	10.1721	cis
17467575	Thnsl2	threonine synthase-like 2 (bacterial)	232078	chr6	-	71.1283	71.1444	UNC11382880	chr6	75.0493	71.0343	76.88	7.49019	8.24895	6.19572	25.5965	cis
17467589	Smyd1	SET and MYND domain containing 1	12180	chr6	-	71.2145	71.3221	JAX00613162	chr6	71.3589	68.0156	71.5757	7.63744	8.49803	6.24703	41.5544	cis
17467656	Mrpl35	mitochondrial ribosomal protein L35	66223	chr6	-	71.8135	71.8238	UNC11350970	chr6	72.735	71.5459	76.8025	7.53235	8.4229	6.21591	15.5347	cis
17467711	Usp39	ubiquitin specific peptidase 39	28035	chr6	-	72.3189	72.3451	UNC11348738	chr6	72.5691	71.9938	82.3137	7.40864	8.27933	6.21506	11.1147	cis
17467730	Rnf181	ring finger protein 181	66510	chr6	-	72.3601	72.3624	UNC11344169	chr6	72.2692	72.2105	72.7044	7.51745	8.451	6.21978	27.6672	cis
17467742	Vamp5	vesicle-associated membrane protein 5	53620	chr6	-	72.3684	72.3703	JAX00613506	chr6	72.6091	71.6447	72.7044	7.51161	8.50732	6.17823	20.4678	cis
17467747	Vamp8	vesicle-associated membrane protein 8	22320	chr6	-	72.3852	72.3907	UNC11349701	chr6	72.6359	71.4752	77.1829	7.35142	8.03308	6.19663	9.56966	cis
17467753	Mat2a	methionine adenosyltransferase II, alpha	232087	chr6	-	72.4331	72.4395	UNC11348738	chr6	72.5691	72.0198	72.7044	7.52034	8.25578	6.21374	14.4356	cis
17467782	Elmod3	ELMO/CED-12 domain containing 3	232089	chr6	-	72.566	72.5984	UNC11344169	chr6	72.2692	72.0198	72.7044	7.46059	8.35192	6.17688	24.7242	cis
17467799	Tgoln1	trans-golgi network protein	22134	chr6	-	72.6091	72.617	UNC11348738	chr6	72.5691	72.0198	72.7044	7.34195	8.24332	6.1786	22.8292	cis
17467806	Tcf7l1	transcription factor 7 like 1 (T cell specific, HMG box)	21415	chr6	-	72.6266	72.7891	UNC060119828	chr6	75.3247	71.7552	77.1829	7.64323	8.77605	6.18511	9.69648	cis
17468007	Pole4	polymerase (DNA-directed), epsilon 4 (p12 subunit)	66979	chr6	-	82.6191	82.7053	UNC11488504	chr6	82.3804	80.9156	83.5777	7.45738	8.55846	6.16577	15.6589	cis
17468075	Htra2	HtrA serine peptidase 2	64704	chr6	-	83.0513	83.0546	UNC11475080	chr6	81.4847	80.8156	83.2402	7.53068	8.03961	6.17846	18.086	cis
17468172	Dguok	deoxyguanosine kinase	27369	chr6	-	83.4803	83.507	UNC11505018	chr6	83.5777	80.9156	85.6534	7.57184	8.42521	6.27915	9.63373	cis
17468195	Stambp	STAM binding protein	70527	chr6	-	83.5437	83.5725	UNC11468340	chr6	80.9925	75.8151	86.2195	7.57416	8.48831	6.21056	9.17728	cis
17468222	Cd207	CD207 antigen	246278	chr6	-	83.6714	83.6778	JAX00616101	chr6	83.6637	83.4746	85.4118	7.51728	8.41144	6.2358	26.5646	cis
17468250	Tex261	testis expressed gene 261	21766	chr6	-	83.7689	83.7757	UNC11517152	chr6	84.6304	81.4958	86.2374	7.57846	8.45524	6.2252	16.4951	cis
17468432	Nat8f5	N-acetyltransferase 8 (GCN5-related) family member 5	69049	chr6	-	85.8172	85.821	UNC11539367	chr6	87.1814	84.5482	89.1243	7.8358	9.05804	6.29554	8.57102	cis
17468438	Nat8	N-acetyltransferase 8 (GCN5-related)	68396	chr6	-	85.8304	85.8321	UNC11526578	chr6	86.1492	85.1866	86.3242	7.57046	8.51093	6.17882	51.0723	cis
17468461	Nat8f1	N-acetyltransferase 8 (GCN5-related) family member 1	66116	chr6	-	85.9102	85.9157	UNC11521501	chr6	85.4118	82.1705	86.3242	7.5193	8.34273	6.18417	9.68584	cis
17468501	2310040G24Rik	RIKEN cDNA 2310040G24 gene	381792	chr6	-	86.4835	86.4882	UNC11531638	chr6	86.5434	85.2901	87.7551	7.58131	8.31917	6.25756	16.201	cis
17468678	Isy1	ISY1 splicing factor homolog	57905	chr6	-	87.8185	87.8387	UNC11557981	chr6	88.6411	85.2901	89.1243	7.65779	8.51092	6.26004	13.7163	cis
17468891	Vmn1r53	vomeronasal 1 receptor 53	113853	chr6	-	90.2233	90.2244	UNC11567068	chr6	89.4016	87.8072	90.8776	7.42214	8.12651	6.18109	25.2761	cis
17468961	Nup210	nucleoporin 210	54563	chr6	-	91.0132	91.1167	UNC11580223	chr6	91.1929	87.712	91.7886	7.51404	8.30869	6.20052	10.6147	cis
17469089	Mrps25	mitochondrial ribosomal protein S25	64658	chr6	-	92.1705	92.184	UNC11594458	chr6	92.4122	91.1976	92.6991	7.57974	8.44924	6.23533	18.4172	cis
17469097	Rbsn	rabenosyn, RAB effector	78287	chr6	-	92.1871	92.2149	UNC11596384	chr6	92.58	90.9015	92.6963	7.50974	8.19912	6.18341	21.1631	cis
17469183	Magi1	membrane associated guanylate kinase, WW and PDZ domain containing 1	14924	chr6	-	93.6758	94.2838	UNC11599965	chr6	92.8369	92.7102	94.8996	7.51747	8.4484	6.21807	11.9516	cis
17469259	Suclg2	succinate-Coenzyme A ligase, GDP-forming, beta subunit	20917	chr6	-	95.4738	95.7188	backupJAX00144209	chr6	95.6741	95.5829	97.4864	7.37436	8.56523	6.14452	34.8174	cis
17469406	Gm765	predicted gene 765	330390	chr6	-	98.238	98.3428	UNC11679694	chr6	98.5213	98.2622	98.5999	7.54359	8.29866	6.23383	52.5255	cis
17238179	Rdh18-ps	retinol dehydrogenase 18, pseudogene	380674	chr10	+	127.843	127.844	JAX00302230	chr10	127.632	127.56	127.826	7.51044	8.06442	6.20521	15.0573	cis
17238191	Rdh16f2	RDH16 family member 2	216454	chr10	+	127.867	127.877	UNC18964322	chr10	127.901	127.826	130.548	7.66214	8.86577	6.24309	10.8393	cis
17238199	Sdr9c7	4short chain dehydrogenase/reductase family 9C, member 7	70061	chr10	+	127.899	127.911	UNC18963815	chr10	127.848	127.826	128.213	7.84848	8.76808	6.32235	29.8093	cis
17238293	Mir677	microRNA 677	751518	chr10	+	128.085	128.085	UNC18963711	chr10	127.835	5.69466	129.377	7.55048	8.2085	6.21386	8.16787	cis
17238359	Apon	apolipoprotein N	28194	chr10	+	128.254	128.256	UNC18974176	chr10	128.888	128.483	129.9	7.61658	8.66205	6.21808	27.9496	cis
17238363	Apof	apolipoprotein F	103161	chr10	+	128.268	128.27	UNC18974176	chr10	128.888	127.808	130.548	7.48532	8.38332	6.20756	16.4934	cis
17238367	Stat2	signal transducer and activator of transcription 2	20847	chr10	+	128.271	128.293	UNC18963643	chr10	127.826	127.613	130.084	7.34721	8.11166	6.18444	10.1547	cis
17238433	Cs	citrate synthase	12974	chr10	+	128.338	128.362	UNC18971228	chr10	128.557	127.637	128.687	7.50737	8.42755	6.27326	16.2488	cis
17469739	Rpusd3	RNA pseudouridylate synthase domain containing 3	101122	chr6	-	113.415	113.419	UNC11882183	chr6	113.237	111.753	113.939	7.25227	8.17774	6.12481	11.0506	cis
17469887	Mkrn2os	makorin, ring finger protein 2, opposite strand	70291	chr6	-	115.584	115.593	UNC11909297	chr6	115.706	115.378	116.822	7.50018	8.35644	6.20797	34.4938	cis
17469941	Efcab12	EF-hand calcium binding domain 12	212516	chr6	-	115.811	115.838	JAX00145724	chr6	115.983	115.078	116.842	7.52517	8.16166	6.19284	10.0643	cis
17470060	Rassf4	Ras association (RalGDS/AF-6) domain family member 4	213391	chr6	-	116.634	116.674	UNC11909297	chr6	115.706	112.224	120.499	7.4044	8.11133	6.19379	8.40556	cis
17470196	Ankrd26	ankyrin repeat domain 26	232339	chr6	-	118.503	118.562	UNC11953422	chr6	119.003	116.914	119.203	7.54924	8.42074	6.21643	8.20889	cis
17470301	Adipor2	adiponectin receptor 2	68465	chr6	-	119.354	119.417	UNC11961943	chr6	119.645	119.223	120.642	7.51479	8.73192	6.26449	12.4233	cis
17470313	Wnt5b	wingless-type MMTV integration site family, member 5B	22419	chr6	-	119.433	119.544	UNC11959958	chr6	119.478	119.094	120.642	7.3937	8.23419	6.21088	18.3906	cis
17470394	B4galnt3	beta-1,4-N-acetyl-galactosaminyl transferase 3	330406	chr6	-	120.203	120.295	UNC11969658	chr6	120.378	119.223	120.642	7.41939	8.35218	6.20083	22.4201	cis
17470417	Ccdc77	coiled-coil domain containing 77	67200	chr6	-	120.325	120.364	JAX00624135	chr6	119.203	117.526	119.645	7.50435	8.32876	6.22079	15.1605	cis
17470445	Atp6v1e1	ATPase, H+ transporting, lysosomal V1 subunit E1	11973	chr6	-	120.796	120.823	UNC11976252	chr6	120.942	120.604	121.662	7.3749	8.19129	6.22394	22.0466	cis
17470457	Bid	BH3 interacting domain death agonist	12122	chr6	-	120.893	120.917	backupUNC061494069	chr6	120.656	120.604	121.304	7.4406	8.25479	6.17741	34.1087	cis
17470540	Phc1	polyhomeotic 1	13619	chr6	-	122.318	122.34	JAX00624955	chr6	124.642	120.604	125.287	7.3879	8.11631	6.17687	9.83395	cis
17470592	Gdf3	growth differentiation factor 3	14562	chr6	-	122.606	122.61	UNC11961943	chr6	119.645	116.826	120.642	7.50861	8.56095	6.19725	8.70506	cis
17470740	C1s1	complement component 1, s subcomponent 1	50908	chr6	-	124.532	124.542	UNC12015803	chr6	124.97	123.308	125.287	7.54498	8.32084	6.19926	14.548	cis
17470779	Emg1	EMG1 N1-specific pseudouridine methyltransferase	14791	chr6	-	124.704	124.712	UNC12018638	chr6	125.218	121.242	125.594	7.48239	8.55892	6.14053	9.48089	cis
17471011	Gapdh	glyceraldehyde-3-phosphate dehydrogenase	14433	chr6	-	125.165	125.166	UNC12013897	chr6	124.762	124.499	146.072	7.51798	8.27551	6.28229	8.27292	cis
17471062	Tapbpl	TAP binding protein-like	213233	chr6	-	125.224	125.232	UNC11995753	chr6	122.635	120.942	125.287	7.4271	8.29684	6.17237	10.1953	cis
17471127	Cd9	CD9 antigen	12527	chr6	-	125.461	125.495	UNC12012246	chr6	124.499	123.308	125.778	7.36017	8.37259	6.15851	10.0501	cis
17471213	Tigar	Trp53 induced glycolysis repulatory phosphatase	319801	chr6	-	127.086	127.11	UNC12041506	chr6	126.889	126.752	127.748	7.56921	8.34119	6.1815	18.3466	cis
17471252	Tspan9	tetraspanin 9	109246	chr6	-	127.963	128.141	UNC12055372	chr6	128.092	127.601	129.344	7.42508	8.10578	6.20734	18.1651	cis
17471270	9330102E08Rik	RIKEN cDNA 9330102E08 gene	330427	chr6	-	128.17	128.184	JAX00146645	chr6	128.57	128.118	131.796	7.58932	8.48292	6.22394	9.48943	cis
17471324	Itfg2	integrin alpha FG-GAP repeat containing 2	101142	chr6	-	128.409	128.425	UNC12056945	chr6	128.241	127.897	128.831	7.39573	8.37472	6.19453	12.0586	cis
17471394	A2ml1	alpha-2-macroglobulin like 1	232400	chr6	-	128.54	128.582	backupUNC060427091	chr6	131.607	128.253	132.611	7.62743	8.84869	6.26603	22.2911	cis
17471445	Klrb1	killer cell lectin-like receptor subfamily B member 1	100043861	chr6	-	128.711	128.723	UNC061554700	chr6	132.265	122.72	134.082	7.75746	8.96491	6.3165	9.71139	cis
17471464	Klrb1b	killer cell lectin-like receptor subfamily B member 1B	80782	chr6	-	128.814	128.826	UNC12056945	chr6	128.241	126.752	137.939	7.51871	8.23024	6.22728	8.07144	cis
17471492	2310001H17Rik	RIKEN cDNA 2310001H17 gene	76432	chr6	-	129.209	129.238	JAX00625656	chr6	128.154	128.092	129.372	7.38195	8.3615	6.10923	20.9367	cis
17471528	Clec1a	C-type lectin domain family 1, member a	243653	chr6	-	129.425	129.452	UNC061554700	chr6	132.265	128.092	134.246	7.43411	8.23436	6.18191	14.3582	cis
17471757	Klra9	killer cell lectin-like receptor subfamily A, member 9	16640	chr6	-	130.19	130.193	UNC061554700	chr6	132.265	128.154	135.979	7.84121	8.69114	6.23936	18.6322	cis
17471768	Klra10	killer cell lectin-like receptor subfamily A, member 10	16628	chr6	-	130.279	130.279	JAX00625759	chr6	128.478	128.118	134.246	7.65668	8.65162	6.24433	11.8659	cis
17471828	Klra2	killer cell lectin-like receptor, subfamily A, member 2	16633	chr6	-	131.219	131.247	UNC12100286	chr6	131.508	128.036	133.937	7.31882	8.17906	6.12256	20.1147	cis
17471840	Magohb	mago homolog B, exon junction complex core component	66441	chr6	-	131.284	131.293	JAX00625957	chr6	129.344	128.092	133.937	7.47373	8.22507	6.18222	7.85152	cis
17213608	Adam23	a disintegrin and metallopeptidase domain 23	23792	chr1	+	63.446	63.5951	UNC783025	chr1	61.8861	60.8801	63.8072	7.61168	8.62442	6.21804	12.8865	cis
17213645	Fastkd2	FAST kinase domains 2	75619	chr1	+	63.7307	63.7543	UNC805911	chr1	64.187	61.0494	65.1453	7.39004	8.2215	6.1912	10.1487	cis
17213770	Map2	microtubule-associated protein 2	17756	chr1	+	66.1754	66.4417	UNC010113351	chr1	66.197	64.9702	66.4822	7.42394	8.3755	6.21537	19.9593	cis
17238525	A430046D13Rik	Riken cDNA A430046D13 gene	654440	chr10	+	128.499	128.504	UNC18964322	chr10	127.901	127.808	128.888	7.43734	8.36793	6.24493	9.94486	cis
17238535	Pmel	premelanosome protein	20431	chr10	+	128.706	128.72	JAX00023662	chr10	128.936	127.763	130.016	7.53773	8.14808	6.21982	13.8469	cis
17238580	Sarnp	SAP domain containing ribonucleoprotein	66118	chr10	+	128.822	128.877	UNC18962242	chr10	127.67	127.592	128.763	7.5105	8.46999	6.23134	7.57756	cis
17238605	Itga7	integrin alpha 7	16404	chr10	+	128.934	128.958	UNC18972627	chr10	128.687	128.557	129.752	7.56044	8.40682	6.21613	22.3799	cis
17472023	Mansc1	MANSC domain containing 1	67729	chr6	-	134.609	134.632	JAX00627075	chr6	134.873	133.108	135.02	7.43299	8.34706	6.18368	22.4326	cis
17472089	Grin2b	glutamate receptor, ionotropic, NMDA2B (epsilon 2)	14812	chr6	-	135.73	136.173	UNC12162881	chr6	135.848	131.817	136.707	7.45426	8.42263	6.19796	8.15099	cis
17472114	Plbd1	phospholipase B domain containing 1	66857	chr6	-	136.612	136.662	JAX00627468	chr6	136.081	135.69	136.67	7.49498	8.47218	6.19056	11.1861	cis
17472129	Gucy2c	guanylate cyclase 2c	14917	chr6	-	136.698	136.782	UNC12177614	chr6	136.711	136.698	137.372	7.56025	8.29406	6.19027	16.1765	cis
17472185	Art4	ADP-ribosyltransferase 4	109978	chr6	-	136.849	136.858	UNC12180509	chr6	136.858	135.772	137.328	7.59862	8.47657	6.18377	9.99432	cis
17472223	Rerg	RAS-like, estrogen-regulated, growth-inhibitor	232441	chr6	-	137.055	137.17	UNC12185311	chr6	137.113	137.03	137.813	7.52006	8.5716	6.18095	27.4407	cis
17472271	Slc15a5	solute carrier family 15, member 5	277898	chr6	-	137.984	138.08	UNC12207889	chr6	138.551	137.372	138.694	7.65076	8.91618	6.23849	20.9644	cis
17472385	Slco1a1	solute carrier organic anion transporter family, member 1a1	28248	chr6	-	141.909	141.947	JAX00629059	chr6	141.725	141.676	142.478	7.43487	8.49944	6.20015	34.506	cis
17472530	Kcnj8	potassium inwardly-rectifying channel, subfamily J, member 8	16523	chr6	-	142.565	142.571	UNC12270692	chr6	142.591	142.267	142.868	7.64637	8.60968	6.17406	17.2196	cis
17472598	C2cd5	C2 calcium-dependent domain containing 5	74741	chr6	-	143.011	143.1	UNC12310060	chr6	145.282	144.866	146.383	7.49978	8.37018	6.22521	8.42811	cis
17472760	Bhlhe41	basic helix-loop-helix family, member e41	79362	chr6	-	145.86	145.866	UNC12299801	chr6	144.556	142.539	147.161	7.63259	8.49182	6.24237	9.55181	cis
17472777	Itpr2	inositol 1,4,5-triphosphate receptor 2	16439	chr6	-	146.109	146.502	UNC12330140	chr6	146.423	146.382	147.374	7.50015	8.27926	6.16776	21.2947	cis
17472868	Tm7sf3	transmembrane 7 superfamily member 3	67623	chr6	-	146.603	146.643	UNC12336065	chr6	146.8	146.543	146.872	7.42249	8.52929	6.16681	62.0656	cis
17472893	Mansc4	MANSC domain containing 4	545893	chr6	-	147.075	147.087	UNC12339532	chr6	146.993	146.906	147.374	7.67999	8.40381	6.21208	36.8345	cis
17472909	Gm6288	predicted gene 6288	622129	chr6	-	147.443	147.476	JAX00630602	chr6	147.624	146.939	148.644	7.4802	8.26366	6.21936	13.8058	cis
17473091	Amn1	antagonist of mitotic exit network 1	232566	chr6	-	149.157	149.189	JAX00630870	chr6	148.668	148.644	149.516	7.45523	8.54848	6.19827	49.4475	cis
17473113	D7Ertd143e	DNA segment, Chr 7, ERATO Doi 143, expressed	100303645	chr7	+	3.2188	3.22098	UNC070000382	chr7	3.21531	3.13043	3.93232	7.64013	8.73142	6.29809	15.3244	cis
17473127	Myadm	myeloid-associated differentiation marker	50918	chr7	+	3.28905	3.29913	UNC12370256	chr7	3.41909	3.13043	4.40584	7.62837	8.74328	6.20058	9.19475	cis
17473155	Cacng7	calcium channel, voltage-dependent, gamma subunit 7	81904	chr7	+	3.33662	3.3669	JAX00148221	chr7	3.13043	3.13043	6.67733	7.33121	8.18744	6.18906	7.45908	cis
17473234	Rps9	ribosomal protein S9	76846	chr7	+	3.70399	3.70687	UNC12373496	chr7	3.71529	3.22134	4.24046	7.50357	8.42049	6.20718	28.7436	cis
17473390	Rpl28	ribosomal protein L28	19943	chr7	+	4.79291	4.79324	UNC12384210	chr7	4.95276	4.14165	5.9006	7.49065	8.43515	6.22795	20.5353	cis
17473402	Isoc2a	isochorismatase domain containing 2a	664994	chr7	+	4.87705	4.8957	UNC12383207	chr7	4.87553	4.73848	5.11051	7.41463	8.25222	6.18076	39.4464	cis
17473539	Zfp444	zinc finger protein 444	72667	chr7	+	6.17223	6.19218	UNC12387094	chr7	5.28518	4.73848	6.76043	7.51039	8.81866	6.23224	11.2613	cis
17473580	Zfp667	zinc finger protein 667	384763	chr7	+	6.28659	6.30662	UNC12388871	chr7	5.58604	3.13043	13.9795	7.51076	8.46161	6.21514	7.56623	cis
17473603	Zfp28	zinc finger protein 28	22690	chr7	+	6.38334	6.39589	UNC12388871	chr7	5.58604	3.13043	6.76043	7.55771	8.50373	6.24163	9.16683	cis
17473786	Zscan22	zinc finger and SCAN domain containing 22	232878	chr7	+	12.8978	12.9089	UNC12443299	chr7	15.7516	5.11051	17.13	7.6364	8.31505	6.22671	8.34583	cis
17473806	Rnf225	ring finger protein 225	381845	chr7	+	12.9274	12.9307	JAX00148593	chr7	10.5198	7.13381	13.0143	7.58717	8.47902	6.22536	55.0465	cis
17473810	Zfp324	zinc finger protein 324	243834	chr7	+	12.9659	12.9729	UNC12416196	chr7	11.9303	6.74405	15.9032	7.359	8.43047	6.12838	19.6239	cis
17473832	Trim28	tripartite motif-containing 28	21849	chr7	+	13.0242	13.0309	JAX00148771	chr7	13.0224	11.1937	18.8881	7.5182	8.42731	6.19962	7.88113	cis
17474035	Napa	N-ethylmaleimide sensitive fusion protein attachment protein alpha	108124	chr7	+	16.0985	16.1175	UNC12448565	chr7	16.2322	15.7516	19.0733	7.39967	8.304	6.20996	8.52727	cis
17474122	Tmem160	transmembrane protein 160	69094	chr7	+	16.4528	16.4555	backupUNC071736088	chr7	13.9795	6.67733	17.0862	7.42706	8.47065	6.16764	8.36589	cis
17474136	Ap2s1	adaptor-related protein complex 2, sigma 1 subunit	232910	chr7	+	16.7385	16.7493	JAX00632555	chr7	17.022	16.2685	18.3225	7.58447	8.52771	6.22905	17.6521	cis
17474181	Prkd2	protein kinase D2	101540	chr7	+	16.8429	16.8704	UNC12453743	chr7	16.6733	16.3993	17.0862	7.51607	8.43928	6.24522	13.1664	cis
17474444	Dmwd	dystrophia myotonica-containing WD repeat motif	13401	chr7	+	19.0763	19.0827	UNC12474416	chr7	18.7863	16.6385	19.7687	7.53438	8.6605	6.20623	9.20067	cis
17474485	Fbxo46	F-box protein 46	243867	chr7	+	19.1317	19.1382	UNC12484354	chr7	19.6112	16.6761	24.5878	7.29645	8.17678	6.19475	8.08384	cis
17474491	Snrpd2	small nuclear ribonucleoprotein D2	107686	chr7	+	19.1497	19.1527	backupUNC070037076	chr7	19.3489	17.2111	23.3858	7.50002	8.71955	6.25179	18.5992	cis
17474593	Ercc2	excision repair cross-complementing rodent repair deficiency, complementation group 2	13871	chr7	+	19.3823	19.3949	UNC12486155	chr7	19.7687	19.118	19.9459	7.48626	8.6919	6.24047	30.035	cis
17474679	Gm16174	predicted gene 16174	102638408	chr7	+	19.8166	19.8186	JAX00633065	chr7	19.5638	19.0733	24.6736	7.56194	8.63543	6.22217	19.1375	cis
17474776	Vmn1r139	vomeronasal 1 receptor 139	667444	chr7	+	22.0769	22.0771	UNC12513143	chr7	25.3436	19.7687	25.982	7.48806	8.27552	6.26597	8.10699	cis
17474900	Zfp235	zinc finger protein 235	56525	chr7	+	24.1342	24.1427	UNC12507725	chr7	24.8274	24.7653	25.6019	7.55457	8.32562	6.23615	10.5668	cis
17474956	Smg9	smg-9 homolog, nonsense mediated mRNA decay factor (C. elegans)	71997	chr7	+	24.3998	24.4227	JAX00633337	chr7	24.2934	16.6385	24.7815	7.49611	8.32058	6.2237	14.9656	cis
17474983	Cadm4	cell adhesion molecule 4	260299	chr7	+	24.4821	24.5042	UNC12504998	chr7	24.5878	19.9322	24.8274	7.51347	8.29742	6.17586	18.1879	cis
17475001	Irgq	immunity-related GTPase family, Q	210146	chr7	+	24.5307	24.5384	UNC12504998	chr7	24.5878	19.9322	25.3293	7.62431	8.3901	6.23671	10.8852	cis
17475006	Xrcc1	X-ray repair complementing defective repair in Chinese hamster cells 1	22594	chr7	+	24.5472	24.5734	UNC12504998	chr7	24.5878	20.0426	26.3088	7.58161	8.22132	6.20615	7.79031	cis
17475037	Phldb3	pleckstrin homology like domain, family B, member 3	232970	chr7	+	24.6114	24.6293	backupUNC070052516	chr7	24.3727	18.2104	24.8274	7.43657	8.46966	6.16817	10.5074	cis
17475170	Zfp574	zinc finger protein 574	232976	chr7	+	25.0774	25.0835	UNC12514434	chr7	25.4712	24.7974	26.1343	7.42818	8.38862	6.17319	11.697	cis
17475182	Zfp526	zinc finger protein 526	210172	chr7	+	25.2215	25.2273	UNC12521150	chr7	26.2256	24.395	26.4296	7.52974	8.29132	6.24155	7.67394	cis
17475251	Megf8	multiple EGF-like-domains 8	269878	chr7	+	25.3172	25.3657	UNC12512780	chr7	25.3096	24.5878	25.8126	7.45892	8.27904	6.23225	15.8143	cis
17475311	Dmac2	distal membrane arm assembly complex 2	66349	chr7	+	25.6194	25.6255	JAX00633657	chr7	25.6447	25.5779	25.8126	7.4419	8.45144	6.2256	23.0828	cis
17475327	Exosc5	exosome component 5	27998	chr7	+	25.6592	25.668	JAX00633649	chr7	25.5779	24.8274	26.3088	7.5881	8.54388	6.18896	10.031	cis
17475373	Cyp2b13	cytochrome P450, family 2, subfamily b, polypeptide 13	13089	chr7	+	26.0817	26.0961	UNC070625905	chr7	26.1343	25.7701	26.3088	7.75267	8.89811	6.24715	30.397	cis
17475385	Cyp2b9	cytochrome P450, family 2, subfamily b, polypeptide 9	13094	chr7	+	26.1877	26.2106	UNC12521610	chr7	26.3088	25.7701	27.0457	8.83949	10.6177	6.79414	18.0755	cis
17475469	Cyp2a5	cytochrome P450, family 2, subfamily a, polypeptide 5	13087	chr7	+	26.8353	26.8435	UNC12538401	chr7	27.8571	24.395	28.0598	7.34455	8.12567	6.21269	8.82141	cis
17475487	Cyp2a12	cytochrome P450, family 2, subfamily a, polypeptide 12	13085	chr7	+	27.0308	27.0368	UNC12524342	chr7	26.6379	26.4802	27.0457	7.64808	8.71381	6.25254	43.8463	cis
17475498	Cyp2f2	cytochrome P450, family 2, subfamily f, polypeptide 2	13107	chr7	+	27.1199	27.1335	UNC12532252	chr7	27.397	26.3088	27.8058	7.53763	8.59841	6.31939	15.7131	cis
17475542	Coq8b	coenzyme Q8B	76889	chr7	+	27.233	27.2579	JAX00149526	chr7	26.8139	26.1343	36.0341	7.62198	8.5567	6.24789	8.71501	cis
17475580	Blvrb	biliverdin reductase B (flavin reductase (NADPH))	233016	chr7	+	27.448	27.4661	JAX00633908	chr7	27.4753	27.3192	27.9444	7.45766	8.40299	6.17913	19.4868	cis
17475592	Sertad3	SERTA domain containing 3	170742	chr7	+	27.4738	27.4772	UNC12525448	chr7	26.7133	26.413	27.7573	7.45706	8.14389	6.22075	10.786	cis
17475725	Zfp607a	zinc finger protein 607A	545938	chr7	+	27.8606	27.8806	UNC12537732	chr7	27.8058	27.6769	27.8867	7.62058	8.59432	6.21495	26.7012	cis
17475734	Fcgbp	Fc fragment of IgG binding protein	215384	chr7	+	28.0753	28.1205	UNC12541914	chr7	28.1068	27.8571	28.1599	7.45533	8.38602	6.17783	17.189	cis
17475777	Fbl	fibrillarin	14113	chr7	+	28.1698	28.1792	UNC12546145	chr7	28.5971	28.1013	28.8048	7.44456	8.42429	6.19504	27.0208	cis
17475821	Paf1	Paf1, RNA polymerase II complex component	54624	chr7	+	28.393	28.3993	UNC12546145	chr7	28.5971	28.1192	28.9363	7.46171	8.38064	6.17502	8.07787	cis
17475886	Fbxo17	F-box protein 17	50760	chr7	+	28.7168	28.7378	UNC12540220	chr7	27.9779	27.2219	29.5633	7.38934	8.08471	6.19077	8.94158	cis
17475922	Sirt2	sirtuin 2	64383	chr7	+	28.7668	28.7885	UNC12549403	chr7	28.8048	28.1479	29.4128	7.52521	8.348	6.21405	15.5311	cis
17475942	Rinl	Ras and Rab interactor-like	320435	chr7	+	28.7904	28.7988	UNC12549403	chr7	28.8048	28.1479	29.5037	7.49017	8.45964	6.19378	8.88532	cis
17475975	Ech1	enoyl coenzyme A hydratase 1, peroxisomal	51798	chr7	+	28.8252	28.8322	UNC070790469	chr7	28.8955	28.1479	29.3853	7.52671	8.33827	6.17872	10.3406	cis
17475989	Lgals4	lectin, galactose binding, soluble 4	16855	chr7	+	28.8339	28.8417	UNC12549403	chr7	28.8048	28.1479	28.9363	7.49094	8.15814	6.19783	24.7023	cis
17476119	Ppp1r14a	protein phosphatase 1, regulatory (inhibitor) subunit 14A	68458	chr7	+	29.2894	29.2934	UNC12556892	chr7	29.3853	29.1402	29.5556	7.55355	8.63103	6.16934	27.4789	cis
17476175	Zfp84	zinc finger protein 84	74352	chr7	+	29.7686	29.781	UNC12572046	chr7	30.424	29.5483	30.4583	7.56782	8.54043	6.18854	11.8908	cis
17476186	Mir1964	microRNA 1964	100316711	chr7	+	29.7733	29.7734	UNC12559756	chr7	29.6739	29.2214	30.1539	7.47067	8.39752	6.22448	11.2308	cis
17476188	Zfp30	zinc finger protein 30	22693	chr7	+	29.7846	29.7946	UNC12559372	chr7	29.5633	29.5483	30.0489	7.46953	8.06806	6.15628	40.1849	cis
17476199	Zfp790	zinc finger protein 790	233056	chr7	+	29.8162	29.8319	UNC12563949	chr7	29.9509	28.2146	30.4583	7.45494	8.31443	6.19301	7.48522	cis
17476424	Prodh2	proline dehydrogenase (oxidase) 2	56189	chr7	+	30.4937	30.5131	JAX00634558	chr7	30.4918	30.424	31.0435	7.34095	8.332	6.15376	28.2661	cis
17476456	Hspb6	heat shock protein, alpha-crystallin-related, B6	243912	chr7	+	30.5522	30.5549	UNC12573980	chr7	30.546	30.424	34.1931	7.43499	8.41057	6.21606	10.9769	cis
17476478	Igflr1	IGF-like family receptor 1	101883	chr7	+	30.5654	30.568	UNC12573127	chr7	30.4876	30.1452	30.8818	7.35296	8.09305	6.12183	11.9289	cis
17476571	Fam187b	family with sequence similarity 187, member B	76415	chr7	+	30.9739	30.9897	UNC12572633	chr7	30.4583	29.6971	31.0435	7.44227	8.31014	6.20381	18.5359	cis
17476578	Lgi4	leucine-rich repeat LGI family, member 4	243914	chr7	+	31.0594	31.0696	JAX00634766	chr7	31.091	29.1402	35.0658	7.55298	8.23692	6.19978	7.68421	cis
17476690	Gm12758	predicted gene 12758	100126229	chr7	+	34.2344	34.2399	UNC12597006	chr7	34.2604	31.0435	34.4458	7.42299	8.20019	6.22867	14.7423	cis
17476705	Gm12781	predicted gene 12781	102639020	chr7	+	34.6532	34.6604	UNC12599367	chr7	34.4458	34.1931	35.1329	7.39002	8.39293	6.1716	13.6674	cis
17476709	Pepd	peptidase D	18624	chr7	+	34.9124	35.0446	UNC12605737	chr7	34.8183	34.6796	35.2156	7.40513	8.25235	6.17312	21.8348	cis
17476752	Rhpn2	rhophilin, Rho GTPase binding protein 2	52428	chr7	+	35.3342	35.3923	UNC12632101	chr7	36.4498	35.2476	36.6907	7.43124	8.30269	6.156	10.3722	cis
17476773	Cep89	centrosomal protein 89	72140	chr7	+	35.3971	35.4386	UNC12616241	chr7	35.5405	35.1761	36.0341	7.32214	8.42662	6.17614	9.96763	cis
17476872	1600014C10Rik	RIKEN cDNA 1600014C10 gene	72244	chr7	+	38.1832	38.1974	UNC12661746	chr7	39.4405	38.2089	39.953	7.36894	8.1387	6.17143	56.6184	cis
17476881	Zfp939	zinc finger protein 939	233147	chr7	+	39.4495	39.4774	UNC12661746	chr7	39.4405	37.9418	40.2278	7.4912	8.8409	6.23277	23.3578	cis
17476889	Zfp619	zinc finger protein 619	70227	chr7	+	39.5178	39.5393	UNC_rs31675167	chr7	39.6776	37.2653	40.2823	7.46409	8.40295	6.18184	10.4953	cis
17476956	Gm17102	predicted gene 17102	102638296	chr7	+	41.3937	41.3974	UNC12706670	chr7	43.4465	40.7035	44.6456	7.47614	8.48706	6.26497	8.94882	cis
17477116	Etfb	electron transferring flavoprotein, beta polypeptide	110826	chr7	+	43.4442	43.4578	UNC12683079	chr7	40.7419	40.4084	44.6265	7.60385	8.75279	6.22358	10.9062	cis
17477127	Vsig10l	V-set and immunoglobulin domain containing 10 like	75690	chr7	+	43.4632	43.4715	UNC12711275	chr7	43.8167	40.3984	49.1841	7.38919	8.15919	6.21635	8.44833	cis
17477151	Zfp719	zinc finger protein 719	210105	chr7	+	43.5796	43.5933	JAX00150864	chr7	46.2978	40.7706	49.1841	7.37939	8.18525	6.17996	8.69242	cis
17477347	Klk1b22	kallikrein 1-related peptidase b22	13646	chr7	+	44.1148	44.1163	UNC12718078	chr7	44.4134	44.2869	44.6265	7.74984	9.00548	6.29634	28.6695	cis
17477377	Klk1b4	kallikrein 1-related pepidase b4	18048	chr7	+	44.2096	44.2116	UNC12685397	chr7	40.8743	40.4084	44.6265	7.4591	8.37355	6.24701	18.7796	cis
17477391	Klk1	kallikrein 1	16612	chr7	+	44.2276	44.2296	UNC12716408	chr7	44.249	43.9261	44.6265	7.42913	8.14373	6.26703	10.8574	cis
17477475	Aspdh	aspartate dehydrogenase domain containing	68352	chr7	+	44.4654	44.4678	UNC12718665	chr7	44.4669	44.249	44.8153	7.536	8.19805	6.19303	8.47487	cis
17477486	Josd2	Josephin domain containing 2	66124	chr7	+	44.468	44.4715	UNC12718665	chr7	44.4669	44.249	44.8153	7.41261	8.12201	6.19938	13.1865	cis
17238840	Syne1	spectrin repeat containing, nuclear envelope 1	64009	chr10	-	5.21567	5.21583	UNC17377242	chr10	8.11853	7.13543	13.8444	7.61398	8.47667	6.16015	8.38164	cis
17477540	Vrk3	vaccinia related kinase 3	101568	chr7	+	44.7485	44.7773	JAX00636793	chr7	40.7706	40.2278	44.0282	7.4511	8.33954	6.2196	8.53152	cis
17477619	Fuz	fuzzy planar cell polarity protein	70300	chr7	+	44.8962	44.9018	backupUNC070093603	chr7	45.0265	44.5829	45.3112	7.66021	8.51094	6.19833	12.5569	cis
17477648	Gm15545	predicted gene 15545	100502630	chr7	+	44.987	44.9946	JAX00150758	chr7	44.9131	44.5829	51.7971	7.44443	8.34364	6.26021	13.7447	cis
17477655	Irf3	interferon regulatory factor 3	54131	chr7	+	44.9977	45.0026	JAX00150758	chr7	44.9131	40.3984	46.4858	7.47411	8.36745	6.28338	9.06665	cis
17477698	Pih1d1	PIH1 domain containing 1	68845	chr7	+	45.1544	45.16	UNC12724494	chr7	44.9232	44.5405	49.3819	7.70349	8.51322	6.18319	7.71873	cis
17477734	Tead2	TEA domain family member 2	21677	chr7	+	45.2158	45.2334	UNC12759030	chr7	47.4101	45.1413	54.7425	7.47316	8.25001	6.22135	7.85905	cis
17477897	Bcat2	branched chain aminotransferase 2, mitochondrial	12036	chr7	+	45.5702	45.5895	UNC12790857	chr7	49.2114	45.2932	49.9815	7.49084	8.17432	6.15627	11.1558	cis
17477968	Car11	carbonic anhydrase 11	12348	chr7	+	45.7	45.7047	JAX00150788	chr7	45.3112	45.0265	46.3568	7.41405	8.13467	6.14572	17.1595	cis
17478032	Kdelr1	KDEL (Lys-Asp-Glu-Leu) endoplasmic reticulum protein retention receptor 1	68137	chr7	+	45.8728	45.8835	UNC12739723	chr7	46.1149	44.7883	46.3946	7.41406	8.29569	6.21514	15.7517	cis
17478044	Tmem143	transmembrane protein 143	70209	chr7	+	45.897	45.9165	UNC12709504	chr7	43.6347	40.3984	46.8884	7.53285	8.27964	6.23821	8.14878	cis
17478082	Nomo1	nodal modulator 1	211548	chr7	+	46.0337	46.0839	UNC12744699	chr7	46.3946	45.1122	46.7818	7.62322	8.43305	6.23012	8.39874	cis
17478195	Saa2	serum amyloid A 2	20209	chr7	+	46.7524	46.7543	UNC12752117	chr7	46.9262	46.4059	50.5938	7.49092	8.28525	6.24095	8.42982	cis
17478277	Zdhhc13	zinc finger, DHHC domain containing 13	243983	chr7	+	48.7999	48.8272	UNC12798085	chr7	49.6501	45.3917	53.8941	7.46108	8.35444	6.25901	8.13925	cis
17478296	LOC108167326	uncharacterized LOC108167326	108167326	chr7	+	48.878	48.886	JAX00150871	chr7	46.4059	45.2932	48.2219	7.47141	8.35068	6.23339	10.9277	cis
17478301	Nav2	neuron navigator 2	78286	chr7	+	48.9641	49.6092	JAX00151079	chr7	49.1841	46.7112	55.8557	7.41472	8.32591	6.18669	10.6831	cis
17478352	Htatip2	HIV-1 Tat interactive protein 2	53415	chr7	+	49.7591	49.7737	JAX00638144	chr7	47.9394	46.487	50.2476	7.31645	8.10409	6.12282	29.6177	cis
17478476	Gas2	growth arrest specific 2	14453	chr7	+	51.8625	51.9944	UNC12827738	chr7	51.7971	46.7112	52.6202	7.48416	8.45781	6.17765	28.9607	cis
17478587	A230056P14Rik	RIKEN cDNA A230056P14 gene	320845	chr7	+	55.9626	55.9807	UNC12899577	chr7	56.0028	54.9926	58.9266	7.48844	8.32941	6.17592	45.1325	cis
17478730	Gabrb3	gamma-aminobutyric acid (GABA) A receptor, subunit beta 3	14402	chr7	+	57.5905	57.8277	JAX00640710	chr7	58.8009	56.2629	58.9266	7.43976	8.41414	6.17082	43.1374	cis
17478919	Tarsl2	threonyl-tRNA synthetase-like 2	272396	chr7	+	65.6449	65.6913	UNC13020346	chr7	65.9708	50.4274	66.9841	7.39488	8.49242	6.21417	7.89506	cis
17478942	Tm2d3	TM2 domain containing 3	68634	chr7	+	65.6932	65.7019	UNC13021242	chr7	66.0225	61.7123	66.9841	7.39789	8.36258	6.18201	16.536	cis
17478958	1810008I18Rik	RIKEN cDNA 1810008I18 gene	100503969	chr7	+	65.8041	65.8062	UNC070517053	chr7	65.8568	63.6675	66.2668	7.53129	8.52701	6.17084	25.4833	cis
17478961	Pcsk6	proprotein convertase subtilisin/kexin type 6	18553	chr7	+	65.8624	66.0499	JAX00642275	chr7	67.8447	63.4975	68.4115	7.49061	8.41791	6.21598	13.1254	cis
17478998	Selenos	selenoprotein S	109815	chr7	+	66.0797	66.0893	UNC13031139	chr7	66.6417	64.0512	66.9841	7.50449	8.25991	6.20114	30.6626	cis
17479006	Chsy1	chondroitin sulfate synthase 1	269941	chr7	+	66.1099	66.1731	UNC13021242	chr7	66.0225	64.2862	67.0035	7.37723	8.17026	6.16439	8.03255	cis
17479125	Fam169b	family with sequence similarity 169, member B	434197	chr7	+	68.2739	68.362	UNC13065427	chr7	69.1649	67.0957	69.2692	7.38065	8.19301	6.19358	14.0834	cis
17479183	Fam174b	family with sequence similarity 174, member B	100038347	chr7	+	73.7404	73.7765	UNC13134657	chr7	74.1479	73.3371	75.0398	7.47558	8.23343	6.18359	26.3021	cis
17479205	Akap13	A kinase (PRKA) anchor protein 13	75547	chr7	+	75.5348	75.7532	UNC13206700	chr7	79.4593	73.3987	80.0369	7.48376	8.36742	6.23148	7.88814	cis
17479291	Mrps11	mitochondrial ribosomal protein S11	67994	chr7	+	78.7833	78.7929	backupUNC070523867	chr7	78.8464	70.8061	81.2242	7.37226	8.52725	6.16986	9.51253	cis
17479354	Abhd2	abhydrolase domain containing 2	54608	chr7	+	79.2732	79.3647	JAX00644748	chr7	79.4209	79.1417	79.5729	7.6359	8.44202	6.20256	21.5799	cis
17479516	Gdpgp1	GDP-D-glucose phosphorylase 1	269952	chr7	+	80.2329	80.2414	UNC13238527	chr7	82.0964	79.4929	84.6849	7.56577	8.29516	6.1911	10.578	cis
17479540	Ngrn	neugrin, neurite outgrowth associated	83485	chr7	+	80.2612	80.2653	UNC13223774	chr7	80.9786	78.8693	81.514	7.42537	8.2305	6.25477	9.20184	cis
17479548	Vps33b	vacuolar protein sorting 33B	233405	chr7	+	80.2698	80.2915	UNC13219315	chr7	80.6128	77.8969	80.7775	7.5097	8.52907	6.18717	13.5389	cis
17479596	Hddc3	HD domain containing 3	68695	chr7	+	80.3432	80.3461	UNC13214171	chr7	80.1753	79.712	80.9786	7.55687	8.45243	6.2257	27.6215	cis
17479697	2900076A07Rik	RIKEN cDNA 2900076A07 gene	100504421	chr7	+	81.5236	81.5314	UNC13229969	chr7	81.514	75.311	89.1228	7.41677	8.26163	6.17444	10.9715	cis
17479706	Whamm	WAS protein homolog associated with actin, golgi membranes and microtubules	434204	chr7	+	81.5714	81.5966	UNC13229969	chr7	81.514	77.8969	82.8908	7.46717	8.4052	6.19502	8.63273	cis
17479804	Efl1	elongation factor like GPTase 1	101592	chr7	+	82.6496	82.7777	backupJAX00153545	chr7	82.6119	81.468	89.2994	7.46311	8.59639	6.1962	8.60307	cis
17479899	2310034P14Rik	RIKEN cDNA 2310034P14 gene	69579	chr7	+	83.8845	83.9003	UNC13265433	chr7	84.0672	82.006	87.8813	7.49699	8.4101	6.16002	17.3738	cis
17479907	Gm26708	predicted gene, 26708	102633347	chr7	+	84.1525	84.1948	UNC13263134	chr7	83.8794	81.975	90.7734	7.41159	8.62398	6.19552	13.0848	cis
17479974	Nox4	NADPH oxidase 4	50490	chr7	+	87.2462	87.3987	UNC13307687	chr7	87.1276	84.0672	90.7116	7.47795	8.41266	6.19726	15.6801	cis
17238896	Syne1	spectrin repeat containing, nuclear envelope 1	64009	chr10	-	5.29308	5.29322	CEAJAX00014673	chr10	8.05757	7.13543	13.8444	7.57454	8.40238	6.20595	8.45107	cis
17238898	Syne1	spectrin repeat containing, nuclear envelope 1	64009	chr10	-	5.29372	5.29402	JAX00281276	chr10	7.13543	7.13543	8.20795	7.53829	8.67561	6.24164	11.746	cis
17480041	AI314278	expressed sequence AI314278	101521	chr7	+	89.4263	89.4319	UNC13310481	chr7	87.3238	83.8794	98.5216	7.43702	8.2841	6.20162	7.56546	cis
17480192	Ccdc90b	coiled-coil domain containing 90B	66365	chr7	+	92.5612	92.582	JAX00646908	chr7	91.8767	89.5593	96.3358	7.64888	8.85511	6.2522	8.57892	cis
17480205	Rab30	RAB30, member RAS oncogene family	75985	chr7	+	92.7416	92.837	UNC13374196	chr7	92.5582	88.509	98.5022	7.63253	8.56759	6.21334	10.2129	cis
17480243	Tenm4	teneurin transmembrane protein 4	23966	chr7	+	96.1713	96.9111	UNC13422695	chr7	95.9912	91.3655	96.8945	7.67647	8.60999	6.19392	9.82494	cis
17480324	Kctd21	potassium channel tetramerisation domain containing 21	622320	chr7	+	97.3474	97.3498	UNC13435263	chr7	96.875	95.8216	98.4124	7.46804	8.14893	6.16717	14.3114	cis
17480343	Ndufc2	NADH dehydrogenase (ubiquinone) 1, subcomplex unknown, 2	68197	chr7	+	97.4	97.4077	UNC13441726	chr7	97.4573	94.4449	98.3823	7.37918	8.14933	6.21296	10.28	cis
17480407	Clns1a	chloride channel, nucleotide-sensitive, 1A	12729	chr7	+	97.6967	97.7207	JAX00648180	chr7	97.6788	96.875	98.5667	7.37268	8.17816	6.20174	18.4904	cis
17480485	Lrrc32	leucine rich repeat containing 32	434215	chr7	+	98.4942	98.5018	UNC13452584	chr7	98.3518	96.8945	98.8414	7.52001	8.34558	6.241	12.891	cis
17480491	Thap12	THAP domain containing 12	72981	chr7	+	98.7032	98.7179	UNC13453446	chr7	98.4143	98.3518	100.029	7.39936	8.39616	6.18337	7.6957	cis
17480600	Xrra1	X-ray radiation resistance associated 1	446101	chr7	+	99.8623	99.9178	UNC070377210	chr7	99.653	98.799	100.029	7.61316	8.35139	6.30053	60.5856	cis
17480636	Lipt2	lipoyl(octanoyl) transferase 2 (putative)	67164	chr7	+	100.159	100.161	UNC13493479	chr7	101.662	99.8238	105.438	7.56781	8.39448	6.13376	8.15271	cis
17480641	Kcne3	potassium voltage-gated channel, Isk-related subfamily, gene 3	57442	chr7	+	100.177	100.185	UNC13497365	chr7	102.085	99.6236	107.491	7.56976	8.44639	6.2782	8.57835	cis
17480740	Ucp2	uncoupling protein 2 (mitochondrial, proton carrier)	22228	chr7	+	100.493	100.502	UNC_rs31552189	chr7	100.708	98.5216	106.696	7.56601	8.42814	6.23498	7.90912	cis
17480757	Coa4	cytochrome c oxidase assembly factor 4	68185	chr7	+	100.537	100.54	JAX00648808	chr7	100.179	99.3851	101.238	7.61612	8.61933	6.22778	23.8936	cis
17480763	Rab6a	RAB6A, member RAS oncogene family	19346	chr7	+	100.607	100.641	JAX00648808	chr7	100.179	99.3378	101.094	7.51006	8.34796	6.23176	15.155	cis
17480924	LOC102638993	uncharacterized LOC102638993	102638993	chr7	+	101.55	101.558	JAX00154968	chr7	101.654	100.668	103.081	7.45167	8.51533	6.16082	23.2235	cis
17480962	Anapc15	anaphase prompoting complex C subunit 15	75430	chr7	+	101.896	101.901	UNC13497365	chr7	102.085	99.4662	105.706	7.41297	8.31766	6.15368	9.30647	cis
17481066	Pgap2	post-GPI attachment to proteins 2	233575	chr7	+	102.21	102.238	UNC13537149	chr7	104.239	96.9877	104.864	7.4867	8.38549	6.19737	7.71182	cis
17481087	Stim1	stromal interaction molecule 1	20866	chr7	+	102.268	102.436	JAX00649426	chr7	102.91	101.094	110.809	7.50061	8.48689	6.18482	11.6781	cis
17481260	Trim6	tripartite motif-containing 6	94088	chr7	+	104.219	104.235	UNC13515090	chr7	103.081	102.083	104.387	7.64795	8.50578	6.2243	29.8095	cis
17481274	Trim34a	tripartite motif-containing 34A	94094	chr7	+	104.262	104.262	UNC13515090	chr7	103.081	101.662	104.864	7.35474	8.0387	6.14347	25.534	cis
17481284	Trim34a	tripartite motif-containing 34A	94094	chr7	+	104.3	104.336	JAX00155172	chr7	104.387	101.705	105.706	7.44057	8.50301	6.23462	20.2062	cis
17481297	Gm15133	predicted gene 15133	622070	chr7	+	104.315	104.325	UNC13488188	chr7	101.094	99.6236	104.619	7.52729	8.52687	6.22955	16.3757	cis
17481388	Smpd1	sphingomyelin phosphodiesterase 1, acid lysosomal	20597	chr7	+	105.554	105.558	UNC070383500	chr7	102.534	101.662	105.602	7.45648	8.59947	6.17911	41.1019	cis
17481397	Timm10b	translocase of inner mitochondrial membrane 10B	14356	chr7	+	105.64	105.722	JAX00650029	chr7	106.822	98.799	107.613	7.57038	8.49616	6.24079	12.8272	cis
17481460	Ilk	integrin linked kinase	16202	chr7	+	105.737	105.743	UNC13558539	chr7	106.696	100.029	112.254	7.52234	8.29464	6.22893	7.71757	cis
17481487	Olfr701	olfactory receptor 701	66786	chr7	+	106.814	106.82	backupUNC070399178	chr7	107.613	105.604	110.567	8.16281	9.67742	6.40484	24.016	cis
17481497	Olfr703	olfactory receptor 703	258589	chr7	+	106.845	106.846	UNC13568970	chr7	107.602	101.654	110.986	7.68832	8.84937	6.29851	12.8911	cis
17481541	Syt9	synaptotagmin IX	60510	chr7	+	107.371	107.548	UNC13552460	chr7	105.795	100.577	109.767	7.57593	8.19384	6.16178	7.88443	cis
17481550	Olfml1	olfactomedin-like 1	244198	chr7	+	107.568	107.591	JAX00650029	chr7	106.822	105.714	107.602	7.43908	8.3608	6.16475	18.9938	cis
17481640	Eif3f	eukaryotic translation initiation factor 3, subunit F	66085	chr7	+	108.935	108.943	UNC13591917	chr7	109.388	107.491	110.624	7.43955	8.31637	6.25323	18.9292	cis
17238938	Syne1	spectrin repeat containing, nuclear envelope 1	64009	chr10	-	5.33716	5.55064	CEAJAX00014673	chr10	8.05757	7.13543	8.28271	7.44552	8.43819	6.13715	19.0755	cis
17239023	Cnksr3	Cnksr family member 3	215748	chr10	-	7.11963	7.21173	UNC17377242	chr10	8.11853	7.13543	9.07254	7.51609	8.30292	6.17208	15.9656	cis
17481684	Akip1	A kinase (PRKA) interacting protein 1	57373	chr7	+	109.704	109.712	UNC13593219	chr7	109.496	107.613	110.624	7.54239	8.53889	6.22016	16.8103	cis
17481899	Micalcl	MICAL C-terminal like	100504195	chr7	+	112.368	112.413	UNC13637926	chr7	112.853	111.707	113.709	7.57334	8.39152	6.17361	14.0482	cis
17482133	Tmc5	transmembrane channel-like gene family 5	74424	chr7	+	118.597	118.675	UNC13719664	chr7	118.909	118.414	119.16	7.49539	8.56875	6.18083	40.9229	cis
17482160	Ccp110	centriolar coiled coil protein 110	101565	chr7	+	118.713	118.737	UNC13717637	chr7	118.797	114.076	119.248	7.56659	8.55159	6.20573	7.9768	cis
17482230	Acsm5	acyl-CoA synthetase medium-chain family member 5	272428	chr7	+	119.526	119.544	UNC13728274	chr7	119.59	119.505	120.127	7.31646	8.03963	6.15553	19.7124	cis
17482247	Acsm2	acyl-CoA synthetase medium-chain family member 2	233799	chr7	+	119.554	119.598	UNC13732476	chr7	120.062	119.13	121.661	7.74916	8.75127	6.25975	9.49065	cis
17482272	Acsm1	acyl-CoA synthetase medium-chain family member 1	117147	chr7	+	119.607	119.662	JAX00653349	chr7	120.127	119.18	121.8	7.45528	8.48172	6.26527	10.5439	cis
17482310	Acsm3	acyl-CoA synthetase medium-chain family member 3	20216	chr7	+	119.761	119.787	UNC13731781	chr7	119.995	119.59	120.127	7.49218	8.19037	6.16794	48.4753	cis
17482366	Tmem159	transmembrane protein 159	233806	chr7	+	120.102	120.121	UNC13732476	chr7	120.062	119.248	120.193	7.47386	8.40532	6.2187	11.2826	cis
17482376	Anks4b	ankyrin repeat and sterile alpha motif domain containing 4B	72074	chr7	+	120.174	120.184	UNC13733059	chr7	120.097	119.66	122.159	7.5204	8.43737	6.21324	11.3737	cis
17482719	Ubfd1	ubiquitin family domain containing 1	28018	chr7	+	122.067	122.081	UNC13741992	chr7	120.998	117.298	124.082	7.37337	8.15784	6.15875	8.78576	cis
17482730	Dctn5	dynactin 5	59288	chr7	+	122.133	122.149	JAX00156476	chr7	122.021	120.062	122.294	7.43068	8.09964	6.1611	14.5096	cis
17482752	Chp2	calcineurin-like EF hand protein 2	70261	chr7	+	122.22	122.223	UNC13755033	chr7	122.224	117.457	122.631	7.42538	8.12213	6.2482	8.21511	cis
17482884	Lcmt1	leucine carboxyl methyltransferase 1	30949	chr7	+	123.378	123.43	UNC13765432	chr7	123.212	123.031	124.082	7.51015	8.55952	6.19774	16.0238	cis
17482932	Kdm8	lysine (K)-specific demethylase 8	77035	chr7	+	125.445	125.462	UNC13798568	chr7	125.92	124.972	126.058	7.5008	8.17853	6.17833	12.9592	cis
17483098	Gdpd3	glycerophosphodiester phosphodiesterase domain containing 3	68616	chr7	+	126.766	126.776	UNC13806423	chr7	126.749	126.588	127.031	7.74703	8.8785	6.26342	63.0738	cis
17483194	Sez6l2	seizure related 6 homolog like 2	233878	chr7	+	126.951	126.971	UNC13814957	chr7	127.71	126.059	128.009	7.34808	8.19696	6.21242	15.467	cis
17483532	Kat8	K(lysine) acetyltransferase 8	67773	chr7	+	127.913	127.926	UNC13803988	chr7	126.507	124.134	128.98	7.41663	9.00199	6.15717	7.74904	cis
17483740	Inpp5f	inositol polyphosphate-5-phosphatase F	101490	chr7	+	128.611	128.696	JAX00655544	chr7	128.659	127.907	129.526	7.51333	8.37862	6.20183	15.7959	cis
17483772	Sec23ip	Sec23 interacting protein	207352	chr7	+	128.745	128.785	UNC13825909	chr7	128.742	128.72	129.526	7.551	8.34506	6.15588	28.9274	cis
17483802	Wdr11	WD repeat domain 11	207425	chr7	+	129.592	129.635	UNC13845705	chr7	129.859	128.72	130.877	7.48026	8.51301	6.19762	18.2201	cis
17483842	Tacc2	transforming, acidic coiled-coil containing protein 2	57752	chr7	+	130.602	130.765	UNC070705925	chr7	130.67	129.993	130.734	7.66112	8.53621	6.25244	29.0388	cis
17483912	Htra1	HtrA serine peptidase 1	56213	chr7	+	130.936	130.986	JAX00656104	chr7	131.307	129.986	133.544	7.51572	8.44036	6.18957	7.80027	cis
17484005	Pstk	phosphoseryl-tRNA kinase	214580	chr7	+	131.371	131.388	UNC13863139	chr7	131.023	130.67	133.19	7.48894	8.37372	6.15193	15.2925	cis
17484040	Bub3	BUB3 mitotic checkpoint protein	12237	chr7	+	131.56	131.572	UNC13869312	chr7	131.528	130.694	133.528	7.48677	8.23392	6.15571	7.5317	cis
17484112	Edrf1	erythroid differentiation regulatory factor 1	214764	chr7	+	133.638	133.673	UNC13896693	chr7	133.453	133.155	133.953	7.42597	8.44189	6.21872	10.8663	cis
17484140	Bccip	BRCA2 and CDKN1A interacting protein	66165	chr7	+	133.709	133.721	UNC13897803	chr7	133.537	133.3	133.953	7.5253	8.47238	6.19517	18.3476	cis
17484271	Mgmt	O-6-methylguanine-DNA methyltransferase	17314	chr7	+	136.895	137.128	UNC13947091	chr7	137.013	136.645	137.257	7.45633	8.25733	6.1626	15.882	cis
17484469	Zfp511	zinc finger protein 511	69752	chr7	+	140.036	140.041	JAX00157834	chr7	140.083	139.139	140.127	7.34751	8.26381	6.20986	16.9829	cis
17484484	Paox	polyamine oxidase (exo-N4-amino)	212503	chr7	+	140.126	140.134	UNC13997515	chr7	140.171	140.095	140.183	7.55618	8.41087	6.22119	29.5553	cis
17484494	Mtg1	mitochondrial ribosome-associated GTPase 1	212508	chr7	+	140.138	140.15	UNC13996607	chr7	140.111	139.648	140.952	7.50257	8.37755	6.15296	12.6867	cis
17239113	Sash1	SAM and SH3 domain containing 1	70097	chr10	-	8.72499	8.88606	UNC17386182	chr10	8.71399	7.13543	13.4705	7.3189	8.35433	6.17257	8.33013	cis
17239184	Adgb	androglobin	215772	chr10	-	10.3359	10.4723	UNC100015018	chr10	11.5752	9.46852	11.5982	7.49251	8.31679	6.16246	25.9359	cis
17239227	Rab32	RAB32, member RAS oncogene family	67844	chr10	-	10.545	10.5582	UNC17423826	chr10	11.5125	7.81124	12.6795	7.37957	8.08337	6.20622	11.3845	cis
17239354	Stx11	syntaxin 11	74732	chr10	-	12.9402	12.9642	UNC17436632	chr10	12.5613	11.842	17.966	7.46307	8.29967	6.22224	9.82767	cis
17239371	Ltv1	LTV1 ribosome biogenesis factor	353258	chr10	-	13.1787	13.1931	UNC17449958	chr10	13.3858	9.21063	16.4736	7.41217	8.20399	6.2288	8.15372	cis
17484627	Ric8a	RIC8 guanine nucleotide exchange factor A	101489	chr7	+	140.857	140.863	UNC14022222	chr7	142.384	140.815	143.645	7.6388	8.42407	6.19074	9.87882	cis
17484667	BC024386	cDNA sequence BC023486	212965	chr7	+	140.906	140.908	JAX00658348	chr7	140.849	140.815	141.348	8.19362	9.41684	6.4473	44.1221	cis
17484670	Nlrp6	NLR family, pyrin domain containing 6	101613	chr7	+	140.921	140.928	UNC14009121	chr7	141.08	140.815	141.348	7.72834	8.82577	6.26597	32.6306	cis
17484682	Pgghg	protein glucosylgalactosylhydroxylysine glucosidase	212974	chr7	+	140.942	140.948	UNC14007030	chr7	140.933	140.815	141.562	7.4419	8.35971	6.14392	34.0795	cis
17484701	Ifitm1	interferon induced transmembrane protein 1	68713	chr7	+	140.967	140.97	UNC14007224	chr7	140.952	140.904	141.581	7.55717	8.55903	6.24201	38.8408	cis
17484731	Pkp3	plakophilin 3	56460	chr7	+	141.078	141.09	UNC14006865	chr7	140.904	140.177	142.592	7.45675	8.2782	6.22823	8.44285	cis
17484839	Tmem80	transmembrane protein 80	71448	chr7	+	141.328	141.337	UNC14007030	chr7	140.933	140.177	141.621	7.38016	8.42649	6.20828	19.2779	cis
17484940	Cd151	CD151 antigen	12476	chr7	+	141.467	141.471	UNC14007030	chr7	140.933	140.815	141.621	7.44056	8.62521	6.2456	27.7266	cis
17485357	Dhcr7	7-dehydrocholesterol reductase	13360	chr7	+	143.823	143.848	UNC14041127	chr7	144.211	143.392	144.433	7.5721	8.51459	6.17294	15.3869	cis
17485497	Nlrp12	NLR family, pyrin domain containing 12	378425	chr7	-	3.22171	3.24968	UNC070000382	chr7	3.21531	3.13043	3.41909	7.39103	8.18502	6.19431	30.5293	cis
17485553	Tmc4	transmembrane channel-like gene family 4	353499	chr7	-	3.66588	3.67753	JAX00631112	chr7	3.93232	3.22134	4.40584	7.49074	8.35358	6.21314	10.2762	cis
17485589	Pirb	paired Ig-like receptor B	18733	chr7	-	3.71212	3.71468	UNC12374525	chr7	4.02546	3.13043	4.81805	7.48612	8.3975	6.22086	7.61705	cis
17485649	Gm15448	predicted gene 15448	100041146	chr7	-	3.82209	3.82469	JAX00631112	chr7	3.93232	3.22134	4.81805	7.59059	8.66116	6.26451	20.0017	cis
17485702	Leng9	leukocyte receptor cluster (LRC) member 9	243813	chr7	-	4.14818	4.14986	UNC12388018	chr7	5.36772	3.13043	6.75378	7.51379	8.17651	6.17833	7.65427	cis
17485849	Tmem86b	transmembrane protein 86B	68255	chr7	-	4.62807	4.63044	UNC12382380	chr7	4.81805	3.22134	6.75378	7.51562	8.29377	6.17943	13.7587	cis
17485880	Hspbp1	HSPA (heat shock 70kDa) binding protein, cytoplasmic cochaperone 1	66245	chr7	-	4.66054	4.68496	JAX00148348	chr7	5.38037	4.24046	24.2569	7.45336	8.18469	6.16978	9.23848	cis
17485904	Cox6b2	cytochrome c oxidase subunit VIb polypeptide 2	333182	chr7	-	4.7518	4.75309	UNC12389803	chr7	5.9006	4.6464	6.1909	7.56973	8.88234	6.23433	49.8512	cis
17485937	Ube2s	ubiquitin-conjugating enzyme E2S	77891	chr7	-	4.80827	4.81234	UNC12380039	chr7	4.60039	3.13544	4.95276	7.52663	8.38911	6.20609	11.8649	cis
17485952	Isoc2b	isochorismatase domain containing 2b	67441	chr7	-	4.84497	4.86618	UNC12375156	chr7	4.10034	3.22134	6.75378	7.5848	8.75672	6.27842	25.86	cis
17486145	Zfp773	zinc finger protein 773	76373	chr7	-	7.13116	7.13669	UNC070009066	chr7	10.2197	6.527	16.0416	7.37763	8.23353	6.20869	9.29804	cis
17486159	Vmn2r29	vomeronasal 2, receptor 29	76229	chr7	-	7.21311	7.27819	UNC12400995	chr7	6.76043	5.03763	12.3001	7.4562	8.08164	6.14925	17.6201	cis
17486418	Vmn2r51	vomeronasal 2, receptor 51	100042921	chr7	-	10.1002	10.1026	JAX00631754	chr7	10.726	6.75378	12.3001	7.53533	8.5734	6.24193	11.631	cis
17239401	Pex3	peroxisomal biogenesis factor 3	56535	chr10	-	13.5238	13.5531	UNC17438741	chr10	12.6795	8.06131	14.0139	7.56135	8.35575	6.22609	12.9393	cis
17239420	Aig1	androgen-induced 1	66253	chr10	-	13.6476	13.869	UNC17458403	chr10	13.9328	12.9169	14.3737	7.57874	8.58512	6.23837	13.3571	cis
17239461	Vta1	vesicle (multivesicular body) trafficking 1	66201	chr10	-	14.655	14.7055	UNC17471419	chr10	14.893	13.9328	15.5877	7.48894	8.27906	6.16874	11.8657	cis
17239528	Ccdc28a	coiled-coil domain containing 28A	215814	chr10	-	18.2137	18.2349	UNC17524809	chr10	18.9723	18.1469	19.0683	7.52438	8.52251	6.24145	18.8053	cis
17239539	Hebp2	heme binding protein 2	56016	chr10	-	18.5402	18.5461	UNC17537118	chr10	19.8506	18.1905	20.3743	7.72649	8.52792	6.30364	9.84813	cis
17239616	Pex7	peroxisomal biogenesis factor 7	18634	chr10	-	19.86	19.9076	UNC17539818	chr10	20.0778	19.8506	20.1575	7.49357	8.32053	6.23688	29.6065	cis
17486620	Ube2m	ubiquitin-conjugating enzyme E2M	22192	chr7	-	13.0352	13.0382	UNC12420706	chr7	12.3001	6.74405	16.0405	7.50032	8.35148	6.26978	14.228	cis
17486650	Zswim9	zinc finger SWIM-type containing 9	321008	chr7	-	13.259	13.2787	JAX00148771	chr7	13.0224	6.74405	17.0098	7.4753	8.49576	6.2555	8.63423	cis
17486692	Sult2a6	sulfotransferase family 2A, dehydroepiandrosterone (DHEA)-preferring, member 6	629219	chr7	-	14.2224	14.2548	JAX00148771	chr7	13.0224	11.1937	15.9032	7.27861	8.14451	6.12469	25.3421	cis
17486719	Sult2a7	sulfotransferase family 2A, dehydroepiandrosterone (DHEA)-preferring, member 7	638251	chr7	-	14.4652	14.4929	UNC12443299	chr7	15.7516	6.79134	16.3058	7.87855	8.7724	6.31032	14.6176	cis
17486781	Selenow	selenoprotein W	20364	chr7	-	15.9172	15.9224	UNC070621878	chr7	15.9107	15.7516	16.0416	7.59786	8.59043	6.22612	47.2413	cis
17486834	Dhx34	DEAH (Asp-Glu-Ala-His) box polypeptide 34	71723	chr7	-	16.1861	16.222	UNC12450656	chr7	16.3993	15.7516	17.0098	7.57636	8.46404	6.24934	11.1999	cis
17486859	C5ar2	complement component 5a receptor 2	319430	chr7	-	16.2353	16.2441	UNC12448565	chr7	16.2322	15.9107	16.455	7.39804	8.40485	6.16642	26.7062	cis
17486864	C5ar1	complement component 5a receptor 1	12273	chr7	-	16.2468	16.2593	UNC12448565	chr7	16.2322	15.7516	16.455	7.44371	8.39163	6.18855	15.6315	cis
17486899	Sae1	SUMO1 activating enzyme subunit 1	56459	chr7	-	16.3203	16.3877	UNC12451181	chr7	16.455	16.0416	16.6385	7.39322	8.17227	6.20437	42.466	cis
17487120	Ccdc61	coiled-coil domain containing 61	232933	chr7	-	18.8911	18.9104	UNC12478470	chr7	19.118	18.7863	19.7687	7.43407	8.52488	6.17746	21.6157	cis
17487161	Qpctl	glutaminyl-peptide cyclotransferase-like	67369	chr7	-	19.1407	19.1491	UNC12470658	chr7	18.3561	17.022	19.3489	7.58165	8.6534	6.15587	40.7559	cis
17487346	Clptm1	cleft lip and palate associated transmembrane protein 1	56457	chr7	-	19.6331	19.6557	UNC12484354	chr7	19.6112	18.1713	24.7563	7.53928	8.63101	6.20961	14.3759	cis
17487374	Apoc1	apolipoprotein C-I	11812	chr7	-	19.6895	19.6926	JAX00633165	chr7	19.9322	19.2186	24.5878	7.41819	8.19842	6.18363	21.3092	cis
17487489	Pvr	poliovirus receptor	52118	chr7	-	19.9039	19.9211	JAX00633186	chr7	20.0426	19.7687	25.4322	7.39334	8.41557	6.17986	13.1775	cis
17487672	Zfp111	zinc finger protein 111	56707	chr7	-	24.1938	24.2114	UNC12499463	chr7	24.2569	19.9322	24.79	7.48883	8.24974	6.22153	13.4074	cis
17487681	Zfp109	zinc finger protein 109	56869	chr7	-	24.229	24.2374	JAX00633320	chr7	24.2053	19.6112	24.6736	7.51156	8.54845	6.20781	27.1043	cis
17487796	Rabac1	Rab acceptor 1 (prenylated)	14470	chr7	-	24.9698	24.9727	UNC12512623	chr7	25.2913	24.5878	27.449	7.57093	8.49653	6.20648	10.4317	cis
17487833	Grik5	glutamate receptor, ionotropic, kainate 5 (gamma 2)	14809	chr7	-	25.01	25.0722	UNC12511415	chr7	25.1387	24.395	25.5607	7.54904	8.56724	6.15159	33.7784	cis
17487876	Dedd2	death effector domain-containing DNA binding protein 2	67379	chr7	-	25.2032	25.2199	UNC12514173	chr7	25.4322	24.395	25.8126	7.62026	8.43625	6.19063	13.0361	cis
17487905	Pafah1b3	platelet-activating factor acetylhydrolase, isoform 1b, subunit 3	18476	chr7	-	25.2951	25.298	UNC12513467	chr7	25.3681	24.7974	25.5757	7.43663	8.47064	6.19686	15.2549	cis
17487945	Cxcl17	chemokine (C-X-C motif) ligand 17	232983	chr7	-	25.4001	25.4129	UNC12515314	chr7	25.6019	24.2053	25.8526	7.85543	8.99728	6.36041	11.3228	cis
17487952	Ceacam1	carcinoembryonic antigen-related cell adhesion molecule 1	26365	chr7	-	25.4637	25.4767	UNC12515015	chr7	25.5607	25.3096	25.8126	7.53425	8.14128	6.22008	20.9503	cis
17487964	Ceacam2	carcinoembryonic antigen-related cell adhesion molecule 2	26367	chr7	-	25.5209	25.5399	UNC12514173	chr7	25.4322	25.3908	25.5607	7.52602	8.41024	6.20415	63.3492	cis
17239638	Pde7b	phosphodiesterase 7B	29863	chr10	-	20.3986	20.7249	UNC17548370	chr10	20.7373	20.5032	20.7977	7.42509	8.43792	6.15737	28.1645	cis
17239698	E030030I06Rik	RIKEN cDNA E030030I06 gene	319887	chr10	-	22.1132	22.1492	UNC17561202	chr10	21.7152	19.8404	22.8657	7.47341	8.29714	6.14607	7.70178	cis
17239719	Eya4	EYA transcriptional coactivator and phosphatase 4	14051	chr10	-	23.1048	23.3499	UNC17579002	chr10	23.3047	21.1311	24.0397	7.43306	8.17123	6.20677	11.1124	cis
17239753	Snord100	small nucleolar RNA, C/D box 100	100529075	chr10	-	23.7858	23.7858	UNC17586313	chr10	23.9022	23.2148	23.9992	7.45596	8.34411	6.18566	45.7244	cis
17488148	Mir3101	microRNA 3101	100526505	chr7	-	27.1761	27.1761	UNC12515093	chr7	25.5757	24.395	27.0754	7.52072	8.37371	6.21087	8.64299	cis
17488352	Psmc4	proteasome (prosome, macropain) 26S subunit, ATPase, 4	23996	chr7	-	28.0417	28.0501	UNC12540807	chr7	28.0282	27.7608	28.5459	7.47433	8.21508	6.13659	25.4288	cis
17488406	Supt5	suppressor of Ty 5	20924	chr7	-	28.315	28.3384	UNC12546145	chr7	28.5971	28.0851	28.9363	7.40402	8.51887	6.18344	15.5908	cis
17488463	Med29	mediator complex subunit 29	67224	chr7	-	28.3854	28.3927	UNC12548196	chr7	28.7216	28.1479	29.1957	7.59189	8.30899	6.19267	11.7852	cis
17488535	Mrps12	mitochondrial ribosomal protein S12	24030	chr7	-	28.7397	28.7418	UNC12549751	chr7	28.8433	28.6122	29.3853	7.59351	8.47999	6.23514	20.8714	cis
17488792	Kcnk6	potassium inwardly-rectifying channel, subfamily K, member 6	52150	chr7	-	29.2235	29.2324	UNC12556378	chr7	29.3508	28.8955	30.0489	7.45251	8.45334	6.22126	8.0328	cis
17488799	2200002D01Rik	RIKEN cDNA 2200002D01 gene	72275	chr7	-	29.2468	29.2485	UNC12558731	chr7	29.5006	28.8955	29.8028	7.44393	8.45224	6.20577	20.1048	cis
17488806	Spint2	serine protease inhibitor, Kunitz type 2	20733	chr7	-	29.2564	29.2819	UNC070721782	chr7	29.3526	28.8955	29.5556	7.54597	8.52329	6.17857	16.104	cis
17488900	Zfp27	zinc finger protein 27	22689	chr7	-	29.8936	29.9065	JAX00634416	chr7	29.7751	29.6739	31.0435	7.51784	8.1684	6.25174	16.5967	cis
17488913	Zfp74	zinc finger protein 74	72723	chr7	-	29.9309	29.9541	UNC12559911	chr7	29.6971	28.8955	31.067	7.48463	8.32449	6.14842	12.3619	cis
17488924	Zfp14	zinc finger protein 14	243906	chr7	-	30.0374	30.0514	UNC12568279	chr7	30.1907	29.6971	30.4448	7.64106	8.5142	6.27233	23.3598	cis
17488957	Capns1	calpain, small subunit 1	12336	chr7	-	30.1872	30.1952	UNC12572046	chr7	30.424	29.5006	34.6796	7.43837	8.26998	6.24878	12.1731	cis
17488996	Wdr62	WD repeat domain 62	233064	chr7	-	30.2402	30.2804	JAX00149784	chr7	30.3026	29.4128	31.0449	7.5343	8.3301	6.21612	11.3643	cis
17489035	Sdhaf1	succinate dehydrogenase complex assembly factor 1	68332	chr7	-	30.3215	30.3223	UNC12571429	chr7	30.3747	29.5483	30.4448	7.47768	8.40682	6.28565	29.101	cis
17489223	Cox6b1	cytochrome c oxidase, subunit VIb polypeptide 1	110323	chr7	-	30.617	30.6261	JAX00149784	chr7	30.3026	30.1257	34.4458	7.44558	8.30728	6.18426	14.8186	cis
17489238	Rbm42	RNA binding motif protein 42	68035	chr7	-	30.641	30.6503	UNC12573980	chr7	30.546	30.424	34.3278	7.54201	8.38838	6.23554	9.52129	cis
17489279	Tmem147	transmembrane protein 147	69804	chr7	-	30.7277	30.7295	UNC12575906	chr7	30.7121	30.4918	31.0449	7.3805	8.3515	6.18299	35.5219	cis
17489289	Gapdhs	glyceraldehyde-3-phosphate dehydrogenase, spermatogenic	14447	chr7	-	30.7298	30.7437	UNC12573637	chr7	30.518	29.5483	35.0658	7.52149	8.30537	6.24086	9.76726	cis
17489320	Cd22	CD22 antigen	12483	chr7	-	30.8658	30.8803	UNC12580355	chr7	31.0435	30.424	31.067	7.5569	8.44817	6.23801	17.1051	cis
17489357	Hamp2	hepcidin antimicrobial peptide 2	66438	chr7	-	30.9224	30.9242	UNC12575906	chr7	30.7121	30.424	35.0658	7.88966	9.00858	6.40827	18.9519	cis
17489384	Lsr	lipolysis stimulated lipoprotein receptor	54135	chr7	-	30.9578	30.9832	UNC12574261	chr7	30.5659	30.0288	34.3942	7.40277	8.46492	6.21778	8.60599	cis
17489420	Fxyd1	FXYD domain-containing ion transport regulator 1	56188	chr7	-	31.0517	31.0556	UNC12578580	chr7	30.8999	30.424	34.4458	7.54387	8.37992	6.20973	16.9655	cis
17489464	Scn1b	sodium channel, voltage-gated, type I, beta	20266	chr7	-	31.1166	31.1252	UNC12578224	chr7	30.8818	30.424	34.5222	7.54445	8.58587	6.22599	10.799	cis
17489470	Gramd1a	GRAM domain containing 1A	52857	chr7	-	31.1302	31.1438	UNC12572633	chr7	30.4583	25.2254	34.8183	7.52517	8.48593	6.16064	8.23096	cis
17489495	Scgb2b3	secretoglobin, family 2B, member 3	100043326	chr7	-	31.359	31.362	UNC12575065	chr7	30.6397	30.4448	34.2604	7.99721	9.2314	6.36118	22.8073	cis
17489620	Gpi1	glucose phosphate isomerase 1	14751	chr7	-	34.202	34.2303	UNC12599755	chr7	34.4666	28.2146	35.6769	7.35745	8.17033	6.17302	7.66753	cis
17489642	Gm12762	predicted gene 12762	105247247	chr7	-	34.2304	34.234	JAX00150020	chr7	34.1931	31.0449	34.3278	7.48743	8.32919	6.21362	40.0983	cis
17489645	4931406P16Rik	RIKEN cDNA 4931406P16 gene	233103	chr7	-	34.237	34.3136	UNC12605168	chr7	34.7865	34.2604	35.0658	7.62435	8.60888	6.22699	8.87012	cis
17489668	Lsm14a	LSM14A mRNA processing body assembly factor	67070	chr7	-	34.3447	34.389	UNC12572633	chr7	30.4583	28.2553	34.4458	7.50082	8.56676	6.22737	8.25194	cis
17489713	Lrp3	low density lipoprotein receptor-related protein 3	435965	chr7	-	35.1998	35.2153	UNC12611324	chr7	35.2156	34.4059	40.4084	7.54315	8.41629	6.23521	9.79679	cis
17489738	Gpatch1	G patch domain containing 1	67471	chr7	-	35.2766	35.3184	UNC12612060	chr7	35.2549	35.1094	35.7389	7.39875	8.18872	6.17336	22.2211	cis
17489801	Nudt19	nudix (nucleoside diphosphate linked moiety X)-type motif 19	110959	chr7	-	35.5473	35.5563	UNC12614782	chr7	35.435	35.2156	35.7126	7.43883	8.17315	6.20751	30.6978	cis
17489824	Dpy19l3	dpy-19-like 3 (C. elegans)	233115	chr7	-	35.6852	35.7544	UNC12631468	chr7	36.4168	35.6022	36.6121	7.37863	7.94196	6.14583	16.5055	cis
17489905	Plekhf1	pleckstrin homology domain containing, family F (with FYVE domain) member 1	72287	chr7	-	38.2207	38.2221	UNC12677488	chr7	40.3889	37.7477	40.8743	7.52655	8.28172	6.19293	8.40754	cis
17489908	Pop4	processing of precursor 4, ribonuclease P/MRP family, (S. cerevisiae)	66161	chr7	-	38.263	38.2713	JAX00636398	chr7	38.096	37.8577	39.7741	7.378	8.29803	6.14938	38.114	cis
17489989	AI987944	expressed sequence AI987944	233168	chr7	-	41.3737	41.3933	UNC12677863	chr7	40.4084	40.2278	44.28	7.66754	8.30046	6.17823	12.5394	cis
17490050	Zfp141	zinc finger protein 141	434178	chr7	-	42.4744	42.5014	UNC12685397	chr7	40.8743	40.6021	43.4465	7.40162	8.17677	6.24532	19.0831	cis
17490233	Emc10	ER membrane protein complex subunit 10	69683	chr7	-	44.4903	44.4964	UNC12719595	chr7	44.5405	44.2201	44.8153	7.43841	8.37305	6.2001	18.644	cis
17239787	Enpp1	ectonucleotide pyrophosphatase/phosphodiesterase 1	18605	chr10	-	24.6395	24.7122	UNC17600381	chr10	24.7739	23.8799	25.0742	7.52829	8.54571	6.26495	26.364	cis
17239817	Enpp3	ectonucleotide pyrophosphatase/phosphodiesterase 3	209558	chr10	-	24.7739	24.8361	UNC17616751	chr10	25.7622	24.7739	25.9827	7.49933	8.07374	6.20972	16.211	cis
17239856	Akap7	A kinase (PRKA) anchor protein 7	432442	chr10	-	25.1691	25.2991	UNC101399094	chr10	24.9593	24.5774	25.6576	7.4757	8.2737	6.20852	13.952	cis
17239876	Smlr1	small leucine-rich protein 1	100504474	chr10	-	25.528	25.5363	JAX00285709	chr10	25.9261	24.5774	26.2839	7.41899	8.39238	6.24407	12.2091	cis
17239919	Lama2	laminin, alpha 2	16773	chr10	-	26.9814	27.6169	UNC17644533	chr10	27.662	24.5774	35.6623	7.47607	8.52763	6.17215	7.83226	cis
17240005	Rnf146	ring finger protein 146	68031	chr10	-	29.3445	29.3624	JAX00194961	chr10	28.8442	27.9192	29.9106	7.49482	8.41575	6.20979	17.4146	cis
17490481	Cpt1c	carnitine palmitoyltransferase 1c	78070	chr7	-	44.9594	44.9747	JAX00150740	chr7	44.66	44.5829	45.0644	7.40855	8.21335	6.20801	32.136	cis
17490599	Rps11	ribosomal protein S11	27207	chr7	-	45.1232	45.1244	JAX00150864	chr7	46.2978	45.0265	46.4858	7.6342	8.52778	6.16405	18.1919	cis
17490608	Rpl13a	ribosomal protein L13A	22121	chr7	-	45.1258	45.1286	UNC12727835	chr7	45.224	45.0644	46.1149	7.44735	8.22009	6.18088	32.3213	cis
17490644	Aldh16a1	aldehyde dehydrogenase 16 family, member A1	69748	chr7	-	45.1413	45.1545	UNC12726520	chr7	45.0967	44.7883	45.3112	7.38146	8.43048	6.18424	17.2241	cis
17490830	Ftl1	ferritin light polypeptide 1	14325	chr7	-	45.4587	45.4599	UNC12741683	chr7	46.2162	40.6021	49.9815	7.55942	8.55632	6.23033	8.15163	cis
17490848	Dhdh	dihydrodiol dehydrogenase (dimeric)	71755	chr7	-	45.4731	45.4887	UNC12739723	chr7	46.1149	44.7883	46.4858	7.4276	8.28467	6.18558	13.3214	cis
17490889	0610005C13Rik	RIKEN cDNA 0610005C13 gene	71661	chr7	-	45.5678	45.5753	UNC12734263	chr7	45.792	45.3917	46.2905	7.36883	8.36425	6.19689	37.9232	cis
17490924	Sphk2	sphingosine kinase 2	56632	chr7	-	45.71	45.718	backupUNC070097979	chr7	45.6269	40.7706	46.5666	7.64177	8.81986	6.22502	9.31289	cis
17491035	Abcc6	ATP-binding cassette, sub-family C (CFTR/MRP), member 6	27421	chr7	-	45.9765	46.0303	UNC12743909	chr7	46.3321	45.5757	46.4858	7.41918	8.03284	6.15974	21.7555	cis
17491147	Sergef	secretion regulating guanine nucleotide exchange factor	27414	chr7	-	46.4432	46.6398	JAX00637839	chr7	46.4858	45.1122	50.5367	7.50353	8.29848	6.20507	8.63942	cis
17491178	Saal1	serum amyloid A-like 1	78935	chr7	-	46.6885	46.7106	UNC12748729	chr7	46.7112	46.3568	46.9262	7.58098	8.5143	6.16964	22.7677	cis
17491199	Saa4	serum amyloid A 4	20211	chr7	-	46.7284	46.7325	JAX00637839	chr7	46.4858	45.5757	49.2663	7.87041	9.29788	6.32313	10.358	cis
17491211	Hps5	HPS5, biogenesis of lysosomal organelles complex 2 subunit 2	246694	chr7	-	46.7607	46.7959	JAX00637928	chr7	46.8884	46.4059	47.4101	7.50843	8.31772	6.16528	37.7742	cis
17491417	Fancf	Fanconi anemia, complementation group F	100040608	chr7	-	51.8606	51.8622	UNC12878882	chr7	54.6165	46.4059	58.7903	7.43445	8.2877	6.19448	12.6499	cis
17491420	Svip	small VCP/p97-interacting protein	75744	chr7	-	51.9982	52.0058	UNC070501772	chr7	51.9496	50.1543	56.026	7.48636	8.26087	6.22971	11.1048	cis
17491636	Snhg14	small nucleolar RNA host gene 14	52480	chr7	-	59.9697	59.9742	JAX00640733	chr7	58.9266	58.6887	63.1388	7.48009	8.18292	6.19635	23.9196	cis
17491816	Mphosph10	M-phase phosphoprotein 10 (U3 small nucleolar ribonucleoprotein)	67973	chr7	-	64.3766	64.3923	UNC12992682	chr7	64.0512	62.2115	69.2692	7.33178	7.92794	6.14375	9.46564	cis
17491846	Nsmce3	NSE3 homolog, SMC5-SMC6 complex component	66647	chr7	-	64.8677	64.873	UNC12981041	chr7	63.18	55.3353	66.0891	7.47593	8.43805	6.23074	7.94141	cis
17491961	Asb7	ankyrin repeat and SOCS box-containing 7	117589	chr7	-	66.6464	66.6896	JAX00642275	chr7	67.8447	67.0697	68.8228	7.50285	8.40445	6.22866	9.16126	cis
17213990	Atic	5-aminoimidazole-4-carboxamide ribonucleotide formyltransferase/IMP cyclohydrolase	108147	chr1	+	71.5572	71.5796	UNC904171	chr1	71.5744	70.6994	72.1468	7.47681	8.30921	6.20207	16.5397	cis
17214018	Gm8883	predicted gene 8883	667931	chr1	+	71.8882	71.8912	UNC913244	chr1	72.1468	70.5616	72.275	7.49975	8.49237	6.15672	11.0507	cis
17214053	Xrcc5	X-ray repair complementing defective repair in Chinese hamster cells 5	22596	chr1	+	72.3075	72.3949	UNC921036	chr1	72.627	68.7671	73.4906	7.55866	8.46576	6.1309	7.5918	cis
17214075	Smarcal1	SWI/SNF related matrix associated, actin dependent regulator of chromatin, subfamily a-like 1	54380	chr1	+	72.5833	72.6357	UNC929321	chr1	73.1998	67.8617	73.4906	7.48498	8.78736	6.19373	8.12564	cis
17240012	Rspo3	R-spondin 3	72780	chr10	-	29.4532	29.5357	UNC101418682	chr10	30.1665	28.5439	31.3291	7.41986	8.30467	6.20924	10.931	cis
17240043	Gm20300	predicted gene, 20300	100504586	chr10	-	30.6032	30.6057	UNC17664753	chr10	29.1576	28.8616	30.706	7.44618	8.20371	6.19664	25.0253	cis
17240045	Hint3	histidine triad nucleotide binding protein 3	66847	chr10	-	30.6082	30.6185	UNC101418682	chr10	30.1665	29.1576	30.706	7.63627	8.43309	6.25689	30.2267	cis
17240053	Ncoa7	nuclear receptor coactivator 7	211329	chr10	-	30.6458	30.8029	UNC17679767	chr10	30.5371	27.7499	30.7823	7.40903	8.20076	6.25469	10.7651	cis
17240137	Sult3a2	sulfotransferase family 3A, member 2	215895	chr10	-	33.7682	33.7821	UNC17680978	chr10	30.6261	26.3825	34.5354	7.37924	8.169	6.16149	13.0065	cis
17492018	Synm	synemin, intermediate filament protein	233335	chr7	-	67.7306	67.7597	UNC13069862	chr7	69.4875	67.3697	71.1212	7.4858	8.53104	6.24781	12.1288	cis
17492035	Pgpep1l	pyroglutamyl-peptidase I-like	78444	chr7	-	68.2367	68.2642	JAX00152511	chr7	68.8228	67.0957	69.2692	7.51641	8.2202	6.24558	9.06748	cis
17492041	Gm16157	predicted gene 16157	100504026	chr7	-	68.2667	68.2766	UNC13065427	chr7	69.1649	68.0813	69.2692	7.46777	8.40214	6.20349	20.7542	cis
17492196	Slco3a1	solute carrier organic anion transporter family, member 3a1	108116	chr7	-	74.2759	74.5547	UNC13139703	chr7	74.4678	72.4796	75.7288	7.44496	8.06083	6.20302	10.3877	cis
17492280	Mrpl46	mitochondrial ribosomal protein L46	67308	chr7	-	78.7752	78.7835	UNC13194852	chr7	78.627	78.2209	84.1846	7.32551	8.19882	6.23243	8.52716	cis
17492340	Polg	polymerase (DNA directed), gamma	18975	chr7	-	79.449	79.4664	JAX00644748	chr7	79.4209	78.3328	79.4929	7.4769	8.48327	6.21931	11.9379	cis
17492457	Ap3s2	adaptor-related protein complex 3, sigma 2 subunit	11778	chr7	-	79.877	79.9206	UNC13219961	chr7	80.6759	79.712	81.4586	7.51733	8.2879	6.20662	19.9094	cis
17492466	Arpin	actin-related protein 2/3 complex inhibitor	70420	chr7	-	79.9254	79.9353	UNC13219315	chr7	80.6128	79.5817	80.7775	7.46883	8.26846	6.17732	16.6351	cis
17492495	Cib1	calcium and integrin binding 1 (calmyrin)	23991	chr7	-	80.2273	80.2326	UNC13219961	chr7	80.6759	79.7544	81.2242	7.45224	8.22854	6.1806	32.7587	cis
17492509	Rccd1	RCC1 domain containing 1	269955	chr7	-	80.3168	80.3244	UNC13219315	chr7	80.6128	79.712	80.8134	7.87617	8.7303	6.27357	13.858	cis
17492523	Unc45a	unc-45 myosin chaperone A	101869	chr7	-	80.3255	80.3402	UNC13220576	chr7	80.7243	79.1417	81.4915	7.4878	8.12218	6.17386	11.6735	cis
17492549	Man2a2	mannosidase 2, alpha 2	140481	chr7	-	80.353	80.3712	UNC13219961	chr7	80.6759	79.712	81.2242	7.37442	7.99399	6.17444	21.0736	cis
17492703	Wdr73	WD repeat domain 73	71968	chr7	-	80.8918	80.9012	UNC13265826	chr7	84.0998	81.4354	84.1846	7.39078	8.39295	6.21518	12.5411	cis
17493005	Fah	fumarylacetoacetate hydrolase	14085	chr7	-	84.5852	84.6067	UNC13274862	chr7	84.7535	83.4609	89.5142	7.70356	9.1575	6.32106	18.0028	cis
17493185	Tmem135	transmembrane protein 135	72759	chr7	-	89.1412	89.4041	UNC13338505	chr7	90.0212	89.1974	92.475	7.59828	8.54784	6.18646	8.56478	cis
17493212	Prss23	protease, serine 23	76453	chr7	-	89.5084	89.5176	UNC13322634	chr7	88.5626	84.229	89.8356	7.52397	8.59266	6.22527	16.3151	cis
17493266	2310010J17Rik	RIKEN cDNA 2310010J17 gene	78329	chr7	-	90.1249	90.1299	UNC13330995	chr7	89.4707	84.5852	92.5582	7.51739	8.82289	6.23398	14.3987	cis
17493298	Tmem126b	transmembrane protein 126B	68472	chr7	-	90.4682	90.476	UNC13358086	chr7	91.4051	81.514	97.6788	7.49553	8.44874	6.22645	8.73257	cis
17493358	Ddias	DNA damage-induced apoptosis suppressor	74041	chr7	-	92.8576	92.8742	JAX00647175	chr7	93.165	92.5145	95.8216	7.50021	8.68269	6.2033	7.86182	cis
17493436	Aamdc	adipogenesis associated Mth938 domain containing	66273	chr7	-	97.5504	97.5795	UNC13435263	chr7	96.875	96.7824	97.7671	7.57785	8.69249	6.22305	19.2477	cis
17493461	Aqp11	aquaporin 11	66333	chr7	-	97.7264	97.7382	JAX00648180	chr7	97.6788	96.7824	97.7671	7.51852	8.49458	6.16777	30.6907	cis
17493467	Myo7a	myosin VIIA	17921	chr7	-	98.0511	98.1178	UNC13453029	chr7	98.3823	98.0356	98.6899	7.39241	8.30223	6.23946	14.5132	cis
17493526	Capn5	calpain 5	12337	chr7	-	98.1217	98.1783	UNC13442417	chr7	97.4918	96.875	101.759	7.47426	8.44103	6.23314	8.8788	cis
17493556	Acer3	alkaline ceramidase 3	66190	chr7	-	98.2161	98.3212	UNC13448002	chr7	97.9937	95.9912	98.3823	7.55268	8.50343	6.21254	14.5743	cis
17493614	Uvrag	UV radiation resistance associated gene	78610	chr7	-	98.8885	99.1411	JAX00154798	chr7	99.3851	98.3518	99.4662	7.48765	8.42429	6.213	16.214	cis
17493668	Rps3	ribosomal protein S3	27050	chr7	-	99.4779	99.4837	UNC070376664	chr7	99.4662	99.3851	100.162	7.50734	8.52864	6.19457	35.2174	cis
17493681	Snord15b	small nucleolar RNA, C/D box 14B	449631	chr7	-	99.4796	99.4797	UNC13469350	chr7	99.6236	98.799	100.943	7.65224	8.42378	6.23446	18.2654	cis
17493683	Snord15a	small nucleolar RNA, C/D box 15A	449630	chr7	-	99.4828	99.4829	UNC070376664	chr7	99.4662	98.3823	100.162	7.43245	8.3854	6.185	34.3881	cis
17493685	Tpbgl	trophoblast glycoprotein-like	100503386	chr7	-	99.6241	99.6268	UNC070377210	chr7	99.653	98.4124	101.705	7.5199	8.45648	6.22612	19.7928	cis
17493730	Rnf169	ring finger protein 169	108937	chr7	-	99.9208	99.9804	UNC13469350	chr7	99.6236	98.799	101.974	7.45947	8.33684	6.19174	23.0375	cis
17493739	Pold3	polymerase (DNA-directed), delta 3, accessory subunit	67967	chr7	-	100.083	100.122	UNC13479344	chr7	100.36	99.9034	101.759	7.59606	8.7072	6.21349	18.5357	cis
17493786	D630004N19Rik	RIKEN cDNA D630004N19 gene	402747	chr7	-	100.546	100.608	UNC13468103	chr7	99.5262	96.8945	101.705	7.59609	8.70494	6.20596	8.29904	cis
17493807	Plekhb1	pleckstrin homology domain containing, family B (evectins) member 1	27276	chr7	-	100.643	100.658	UNC13474911	chr7	100.029	99.9034	100.957	7.41859	8.50787	6.21569	32.0184	cis
17493869	P2ry6	pyrimidinergic receptor P2Y, G-protein coupled, 6	233571	chr7	-	100.938	100.964	JAX00154968	chr7	101.654	99.3851	105.795	7.5765	8.69917	6.18181	10.4275	cis
17493875	P2ry2	purinergic receptor P2Y, G-protein coupled 2	18442	chr7	-	100.997	101.012	UNC13487524	chr7	101.035	96.8945	101.705	7.45995	8.57263	6.23773	10.9524	cis
17493880	Atg16l2	autophagy related 16-like 2 (S. cerevisiae)	73683	chr7	-	101.29	101.302	UNC13493479	chr7	101.662	99.3851	105.604	7.42819	8.44458	6.24245	9.52407	cis
17493912	Art2b	ADP-ribosyltransferase 2b	11872	chr7	-	101.58	101.581	UNC13491180	chr7	101.462	99.6236	104.619	7.46618	8.10676	6.22361	33.8663	cis
17493916	Inppl1	inositol polyphosphate phosphatase-like 1	16332	chr7	-	101.823	101.838	UNC13493479	chr7	101.662	98.799	105.706	7.63919	8.32271	6.22017	9.33797	cis
17493949	Folr2	folate receptor 2 (fetal)	14276	chr7	-	101.84	101.845	UNC13497365	chr7	102.085	101.662	104.485	7.49276	8.28217	6.241	31.1892	cis
17493980	Lrrc51	leucine rich repeat containing 51	69358	chr7	-	101.913	101.934	JAX00154968	chr7	101.654	99.9034	105.604	7.50801	8.37442	6.18652	10.9692	cis
17494101	Trim21	tripartite motif-containing 21	20821	chr7	-	102.559	102.565	UNC13534893	chr7	104.149	101.705	104.387	7.46614	8.21206	6.18354	18.5675	cis
17240190	Dse	dermatan sulfate epimerase	212898	chr10	-	34.1521	34.2074	UNC17726518	chr10	34.1317	26.3825	38.7988	7.60157	8.36183	6.16059	7.69384	cis
17240239	Fam229b	family with sequence similarity 229, member B	66337	chr10	-	39.1188	39.1339	UNC17786870	chr10	38.7988	36.52	41.3204	7.55466	8.5017	6.22492	7.85299	cis
17240250	Wisp3	WNT1 inducible signaling pathway protein 3	327743	chr10	-	39.151	39.1638	JAX00287306	chr10	37.3546	36.52	41.6532	7.58259	8.61983	6.16144	9.31319	cis
17240291	Mfsd4b4	major facilitator superfamily domain containing 4B4	213332	chr10	-	39.894	39.8992	UNC17819473	chr10	41.2141	36.52	43.8073	7.54876	8.58334	6.24475	9.2516	cis
17494117	Trim68	tripartite motif-containing 68	101700	chr7	-	102.678	102.687	JAX00649426	chr7	102.91	101.775	104.239	7.3155	8.20343	6.17852	25.612	cis
17494325	Trim5	tripartite motif-containing 5	667823	chr7	-	104.264	104.353	JAX00155172	chr7	104.387	101.654	104.864	7.46661	8.2814	6.17313	20.4648	cis
17494353	Trim12a	tripartite motif-containing 12A	76681	chr7	-	104.3	104.315	UNC13537149	chr7	104.239	101.875	104.387	7.50435	8.09485	6.21754	61.5456	cis
17494408	Trim30d	tripartite motif-containing 30D	209387	chr7	-	104.471	104.488	UNC13537149	chr7	104.239	100.708	105.341	7.59483	8.48433	6.15824	32.4504	cis
17494541	Trim3	tripartite motif-containing 3	55992	chr7	-	105.604	105.633	UNC13541845	chr7	104.619	99.6236	105.706	7.38574	8.1613	6.24459	9.67509	cis
17494576	Rrp8	ribosomal RNA processing 8, methyltransferase, homolog (yeast)	101867	chr7	-	105.732	105.737	backupUNC070399178	chr7	107.613	105.604	110.567	7.66873	8.2694	6.21574	14.7032	cis
17494596	Tpp1	tripeptidyl peptidase I	12751	chr7	-	105.745	105.752	UNC13552460	chr7	105.795	104.387	109.078	7.4528	8.44645	6.1992	21.02	cis
17494668	Gm4759	GTPase, very large interferon inducible 1 pseudogene	209380	chr7	-	106.422	106.44	UNC13567160	chr7	107.491	105.604	107.613	7.5571	8.43447	6.23247	34.8567	cis
17494677	Gm1966	predicted gene 1966	434223	chr7	-	106.6	106.645	UNC13551890	chr7	105.706	105.438	107.602	7.5357	8.48502	6.1467	29.0493	cis
17494717	Olfr6	olfactory receptor 6	233670	chr7	-	106.956	106.957	UNC13567160	chr7	107.491	101.705	107.613	7.79819	8.88354	6.32685	10.0706	cis
17494894	St5	suppression of tumorigenicity 5	76954	chr7	-	109.524	109.617	backupUNC070684462	chr7	110.965	105.604	111.792	7.39659	8.30799	6.23611	8.47472	cis
17495029	Sbf2	SET binding factor 2	319934	chr7	-	110.308	110.615	UNC13609494	chr7	110.809	110.567	111.535	7.49863	8.34413	6.22899	18.5026	cis
17495097	Lyve1	lymphatic vessel endothelial hyaluronan receptor 1	114332	chr7	-	110.851	110.863	UNC13611899	chr7	111.03	110.521	111.746	7.58693	8.46086	6.21395	16.3867	cis
17495168	1700012D14Rik	RIKEN cDNA 1700012D14 gene	75479	chr7	-	111.118	111.123	UNC13606620	chr7	110.567	108.969	112.545	7.43714	8.42666	6.16621	9.46734	cis
17495309	4933406I18Rik	RIKEN cDNA 4933406I18 gene	71045	chr7	-	114.316	114.415	UNC13659322	chr7	114.536	114.076	115.239	7.59558	8.64962	6.24587	9.99511	cis
17495320	Cyp2r1	cytochrome P450, family 2, subfamily r, polypeptide 1	244209	chr7	-	114.55	114.563	UNC13654853	chr7	114.101	113.017	116.525	7.45858	8.54604	6.21663	10.3926	cis
17240342	Rpf2	ribosome production factor 2 homolog	67239	chr10	-	40.2233	40.247	UNC17852365	chr10	43.7778	41.664	45.0155	7.50177	8.49198	6.18791	16.668	cis
17240357	Gtf3c6	general transcription factor IIIC, polypeptide 6, alpha	67371	chr10	-	40.2494	40.2577	UNC17793629	chr10	39.2415	37.0013	39.9511	7.40636	8.41383	6.2007	13.7825	cis
17240379	Cdc40	cell division cycle 40	71713	chr10	-	40.8317	40.8831	UNC17789753	chr10	38.9998	35.6623	41.1633	7.39853	8.05843	6.20205	9.6725	cis
17240405	Fig4	FIG4 phosphoinositide 5-phosphatase	103199	chr10	-	41.1884	41.3032	UNC17809879	chr10	40.5338	37.3856	43.6141	7.61818	8.41219	6.23627	12.2279	cis
17240444	Ccdc162	coiled-coil domain containing 162	75973	chr10	-	41.5391	41.5874	JAX00287956	chr10	41.8379	40.27	43.0445	7.44785	8.48763	6.2286	34.0766	cis
17240484	Cep57l1	centrosomal protein 57-like 1	103268	chr10	-	41.7193	41.8098	UNC17796689	chr10	39.4311	39.2199	43.1343	7.45135	8.28323	6.19199	18.5867	cis
17240538	Afg1l	AFG1 like ATPase	215951	chr10	-	42.3127	42.4785	UNC17832163	chr10	42.2948	41.664	43.6141	7.36545	8.58003	6.16442	29.674	cis
17495373	Plekha7	pleckstrin homology domain containing, family A member 7	233765	chr7	-	116.124	116.308	UNC13678770	chr7	116.247	115.084	117.457	7.32752	8.14196	6.20758	13.6758	cis
17495414	Pik3c2a	phosphatidylinositol-4-phosphate 3-kinase catalytic subunit type 2 alpha	18704	chr7	-	116.338	116.443	UNC13677599	chr7	116.161	114.76	116.558	7.59871	8.49188	6.21835	30.4236	cis
17495456	Rps15a	ribosomal protein S15A	267019	chr7	-	118.104	118.116	UNC13727432	chr7	119.505	117.436	122.294	7.45593	8.21192	6.23217	8.08375	cis
17495466	Arl6ip1	ADP-ribosylation factor-like 6 interacting protein 1	54208	chr7	-	118.12	118.13	UNC13728274	chr7	119.59	117.049	121.63	7.51029	8.64944	6.24894	13.2314	cis
17495549	Itpripl2	inositol 1,4,5-triphosphate receptor interacting protein-like 2	319622	chr7	-	118.485	118.49	UNC13733059	chr7	120.097	117.436	120.955	7.6359	8.3881	6.24283	8.78982	cis
17495586	Gde1	glycerophosphodiester phosphodiesterase 1	56209	chr7	-	118.689	118.706	UNC13715819	chr7	118.697	116.473	120.062	7.37764	8.20614	6.2103	8.05536	cis
17495598	Knop1	lysine rich nucleolar protein 1	66356	chr7	-	118.844	118.856	UNC13708283	chr7	118.262	117.404	119.18	7.41615	8.46021	6.16107	11.5274	cis
17495610	Gprc5b	G protein-coupled receptor, family C, group 5, member B	64297	chr7	-	118.972	118.985	UNC13743212	chr7	121.126	120.062	122.159	7.5844	8.40344	6.16046	7.95353	cis
17495651	Pdilt	protein disulfide isomerase-like, testis expressed	71830	chr7	-	119.487	119.52	UNC13725326	chr7	119.342	119.18	119.704	7.46428	8.56334	6.18745	28.8917	cis
17495665	Gm39079	predicted gene, 39079	105243043	chr7	-	119.611	119.612	UNC13727432	chr7	119.505	119.13	119.774	7.63902	8.26146	6.20929	29.3934	cis
17495790	Crym	crystallin, mu	12971	chr7	-	120.186	120.202	UNC13733696	chr7	120.15	120.097	121.126	7.55321	8.39991	6.2321	50.7765	cis
17495812	Pdzd9	PDZ domain containing 9	67983	chr7	-	120.674	120.677	UNC13743212	chr7	121.126	120.062	121.897	7.41195	8.11859	6.14861	16.8057	cis
17495869	Cog7	component of oligomeric golgi complex 7	233824	chr7	-	121.881	121.982	JAX00156476	chr7	122.021	120.655	122.348	7.48738	8.53613	6.18187	9.63496	cis
17495890	Gga2	golgi associated, gamma adaptin ear containing, ARF binding protein 2	74105	chr7	-	121.989	122.021	UNC13754333	chr7	122.177	121.8	122.254	7.43622	8.4135	6.16805	15.414	cis
17496111	Xpo6	exportin 6	74204	chr7	-	126.102	126.2	UNC13815496	chr7	127.768	123.959	129.469	7.4184	8.23354	6.14145	16.9958	cis
17496345	Nupr1	nuclear protein transcription regulator 1	56312	chr7	-	126.623	126.626	UNC13781117	chr7	124.573	123.378	126.14	7.51522	8.40678	6.2089	8.23559	cis
17496354	Sult1a1	sulfotransferase family 1A, phenol-preferring, member 1	20887	chr7	-	126.673	126.676	UNC13798963	chr7	125.951	124.628	127.453	7.52082	8.4419	6.24657	8.71702	cis
17496367	Slx1b	SLX1 structure-specific endonuclease subunit homolog B (S. cerevisiae)	75764	chr7	-	126.689	126.696	UNC13806803	chr7	126.804	125.997	126.937	7.54085	8.2789	6.18484	16.8294	cis
17496589	Qprt	quinolinate phosphoribosyltransferase	67375	chr7	-	127.107	127.122	UNC13812944	chr7	127.415	127.038	127.71	7.42201	8.10205	6.16588	17.2462	cis
17496664	Zfp747	zinc finger protein 747	269997	chr7	-	127.373	127.376	JAX00655310	chr7	127.453	127.038	129.035	7.49127	8.24631	6.2315	21.0727	cis
17496678	E430018J23Rik	RIKEN cDNA E430018J23 gene	101604	chr7	-	127.39	127.394	JAX00654521	chr7	124.599	124.033	125.37	7.46258	8.64138	6.19829	10.3247	cis
17496713	1700008J07Rik	RIKEN cDNA 1700008J07 gene	629159	chr7	-	127.511	127.513	UNC13823965	chr7	128.551	127.038	129.469	7.43836	8.32711	6.19447	9.46865	cis
17496788	Prss53	protease, serine 53	330657	chr7	-	127.886	127.891	UNC13816503	chr7	127.907	127.078	128.72	7.63633	8.5624	6.1855	19.2315	cis
17496806	Prss8	protease, serine 8 (prostasin)	76560	chr7	-	127.926	127.93	UNC13804911	chr7	126.588	123.959	128.611	7.48626	8.10587	6.12969	8.50101	cis
17496863	9130023H24Rik	RIKEN cDNA 9130023H24 gene	100043133	chr7	-	128.235	128.238	UNC13825683	chr7	128.72	127.038	130.213	7.45721	8.59291	6.21554	14.7116	cis
17496867	BC017158	cDNA sequence BC017158	233913	chr7	-	128.272	128.298	UNC13823965	chr7	128.551	128.044	128.652	7.47323	8.57452	6.24068	59.3283	cis
17496920	Mcmbp	minichromosome maintenance complex binding protein	210711	chr7	-	128.697	128.74	UNC13825683	chr7	128.72	127.123	130.852	7.46575	8.36394	6.20234	8.54001	cis
17496973	Ate1	arginyltransferase 1	11907	chr7	-	130.393	130.52	UNC13858606	chr7	130.694	128.791	131.732	7.47517	8.36176	6.2356	8.93153	cis
17497076	Chst15	carbohydrate (N-acetylgalactosamine 4-sulfate 6-O) sulfotransferase 15	77590	chr7	-	132.236	132.317	JAX00157233	chr7	132.062	131.272	133.993	7.44722	8.32141	6.18092	11.5746	cis
17497203	Uros	uroporphyrinogen III synthase	22276	chr7	-	133.686	133.71	UNC13902199	chr7	133.864	133.453	133.953	7.48292	8.44415	6.19392	32.797	cis
17497223	Dhx32	DEAH (Asp-Glu-Ala-His) box polypeptide 32	101437	chr7	-	133.721	133.783	UNC13893641	chr7	133.254	133.112	134.148	7.2863	8.14021	6.13347	10.392	cis
17497283	D7Ertd443e	DNA segment, Chr 7, ERATO Doi 443, expressed	71007	chr7	-	134.266	134.377	JAX00157433	chr7	134.724	134.476	134.814	7.40941	8.42814	6.13289	57.1059	cis
17497414	Mapk1ip1	mitogen-activated protein kinase 1 interacting protein 1	69546	chr7	-	138.836	138.846	UNC13977914	chr7	138.824	138.103	140.334	7.51699	8.32442	6.25136	12.1166	cis
17497554	Tubgcp2	tubulin, gamma complex associated protein 2	74237	chr7	-	139.996	140.036	JAX00157824	chr7	139.941	139.094	140.1	7.60363	8.50998	6.17823	11.2693	cis
17497687	Bet1l	Bet1 golgi vesicular membrane trafficking protein like	54399	chr7	-	140.854	140.856	UNC14013014	chr7	141.49	140.257	141.794	7.61938	8.19671	6.22361	9.40408	cis
17497704	Cox8b	cytochrome c oxidase subunit VIIIb	12869	chr7	-	140.899	140.9	JAX00658348	chr7	140.849	140.815	141.794	8.29804	9.56297	6.50054	16.0803	cis
17497713	Ifitm2	interferon induced transmembrane protein 2	80876	chr7	-	140.955	140.956	UNC13999168	chr7	140.276	140.158	141.621	7.78283	9.22056	6.20626	26.6753	cis
17240608	Qrsl1	glutaminyl-tRNA synthase (glutamine-hydrolyzing)-like 1	76563	chr10	-	43.8743	43.9017	UNC17852837	chr10	43.8073	38.7261	44.6075	7.54183	8.45593	6.2165	11.6643	cis
17240621	Crybg1	crystallin beta-gamma domain containing 1	11630	chr10	-	43.951	44.0048	UNC17861590	chr10	44.5364	43.8493	44.6531	7.38194	8.1838	6.11567	22.3399	cis
17497729	Sigirr	single immunoglobulin and toll-interleukin 1 receptor (TIR) domain	24058	chr7	-	141.091	141.101	JAX00658487	chr7	141.581	139.094	142.326	7.65425	8.57121	6.26606	8.38167	cis
17497785	Hras	Harvey rat sarcoma virus oncogene	15461	chr7	-	141.189	141.193	UNC13996971	chr7	140.135	140.095	141.141	7.40812	8.23767	6.21628	8.3062	cis
17497829	Cdhr5	cadherin-related family member 5	72040	chr7	-	141.269	141.277	UNC14009642	chr7	141.141	140.257	145.321	7.53493	8.46992	6.22886	9.52775	cis
17497885	Gatd1	glutamine amidotransferase like class 1 domain containing 1	213350	chr7	-	141.408	141.414	UNC14013599	chr7	141.562	140.111	142.592	7.60094	8.69493	6.23929	11.436	cis
17497953	Polr2l	polymerase (RNA) II (DNA directed) polypeptide L	66491	chr7	-	141.472	141.473	UNC14011588	chr7	141.348	140.815	141.794	7.47998	8.4348	6.27876	20.276	cis
17497957	Chid1	chitinase domain containing 1	68038	chr7	-	141.493	141.54	UNC14013014	chr7	141.49	140.815	141.701	7.45275	8.43624	6.08865	24.1288	cis
17498323	Tnfrsf23	tumor necrosis factor receptor superfamily, member 23	79201	chr7	-	143.666	143.686	UNC14032105	chr7	143.428	143.392	144.398	7.47946	8.19586	6.17775	10.2039	cis
17498663	C330021F23Rik	RIKEN cDNA C330021F23 gene	546049	chr8	+	3.56801	3.58489	backupUNC080025068	chr8	6.40146	3.87421	7.51228	7.54966	8.50498	6.16531	11.9249	cis
17498738	Trappc5	trafficking protein particle complex 5	66682	chr8	+	3.67631	3.68109	JAX00659320	chr8	3.56769	3.21146	6.60155	7.49189	8.37518	6.20236	8.77194	cis
17498830	Ccl25	chemokine (C-C motif) ligand 25	20300	chr8	+	4.32521	4.35966	JAX00659454	chr8	4.47106	3.42581	6.40146	7.44229	8.35309	6.1904	23.6346	cis
17498847	Cers4	ceramide synthase 4	67260	chr8	+	4.49345	4.52445	JAX00659454	chr8	4.47106	3.21146	8.15196	7.3617	7.96753	6.18058	9.0436	cis
17498867	Gm6410	predicted gene 6410	623223	chr8	+	4.67847	4.68848	backupJAX00158395	chr8	5.29883	3.21146	8.54599	7.29999	8.033	6.23924	9.55963	cis
17498892	Abhd13	abhydrolase domain containing 13	68904	chr8	+	9.97772	9.99193	UNC14138747	chr8	9.94771	9.72329	10.7383	7.43249	8.35448	6.17641	16.5601	cis
17498897	Tnfsf13b	tumor necrosis factor (ligand) superfamily, member 13b	24099	chr8	+	10.0067	10.0359	JAX00660537	chr8	10.1295	9.87504	10.7753	7.49469	8.21212	6.1766	19.9514	cis
17498947	4833411C07Rik	RIKEN cDNA 4833411C07 gene	71624	chr8	+	10.8999	10.9024	UNC14155611	chr8	10.9881	10.7383	12.1799	7.55806	8.71363	6.2111	8.93152	cis
17499014	Naxd	NAD(P)HX dehydratase	69225	chr8	+	11.4975	11.5133	UNC14170409	chr8	12.0515	10.3633	12.9542	7.56438	8.40316	6.22672	12.9116	cis
17499117	Atp11a	ATPase, class VI, type 11A	50770	chr8	+	12.7573	12.868	UNC14182753	chr8	12.8993	12.1093	14.4748	7.3895	8.15843	6.21341	14.2376	cis
17499155	Mcf2l	mcf.2 transforming sequence-like	17207	chr8	+	12.874	13.0207	UNC14182753	chr8	12.8993	12.3027	13.3146	7.42178	8.25372	6.16206	44.1518	cis
17499212	F7	coagulation factor VII	14068	chr8	+	13.0261	13.0358	UNC14187152	chr8	13.1923	10.8859	14.3671	7.46101	8.13656	6.18795	11.6386	cis
17499224	F10	coagulation factor X	14058	chr8	+	13.0373	13.0566	JAX00661318	chr8	13.3548	12.8993	14.4748	7.48517	8.23766	6.21887	14.0384	cis
17499240	Proz	protein Z, vitamin K-dependent plasma glycoprotein	66901	chr8	+	13.0609	13.0744	UNC14188992	chr8	13.3146	10.0148	13.9929	7.63815	8.30362	6.26574	9.20119	cis
17499255	Cul4a	cullin 4A	99375	chr8	+	13.1058	13.1474	UNC14181578	chr8	12.8114	10.3249	14.4748	7.71433	8.59617	6.23886	9.48073	cis
17499290	2810030D12Rik	RIKEN cDNA 2810030D12 gene	78335	chr8	+	13.2008	13.2077	JAX00661344	chr8	13.4391	12.2107	13.574	7.45383	8.23094	6.12532	21.5847	cis
17499310	Tfdp1	transcription factor Dp 1	21781	chr8	+	13.3397	13.378	UNC14169435	chr8	11.9738	9.60254	15.8191	7.64593	8.81485	6.22693	9.21327	cis
17499376	Upf3a	UPF3 regulator of nonsense transcripts homolog A (yeast)	67031	chr8	+	13.7856	13.7985	UNC080463080	chr8	14.3671	12.8993	14.4748	7.42763	8.44365	6.1795	30.4404	cis
17499396	Fbxo25	F-box protein 25	66822	chr8	+	13.9078	13.9404	JAX00661318	chr8	13.3548	12.8993	15.3723	7.56489	8.42363	6.20922	9.83482	cis
17499447	Arhgef10	Rho guanine nucleotide exchange factor (GEF) 10	234094	chr8	+	14.9288	14.9994	UNC14212445	chr8	14.9625	14.6066	15.3723	7.49652	8.00581	6.19399	13.808	cis
17499485	Myom2	myomesin 2	17930	chr8	+	15.0577	15.1312	UNC14218506	chr8	15.2702	14.8479	15.3435	7.64393	8.77516	6.2394	22.5886	cis
17499637	4930467E23Rik	RIKEN cDNA 4930467E23 gene	626415	chr8	+	19.7536	19.7536	JAX00662910	chr8	20.9974	19.5344	22.1208	7.44472	8.38436	6.2248	71.5857	cis
17499647	Gm26853	predicted gene, 26853	101056057	chr8	+	19.7903	19.7935	UNC14290963	chr8	21.7933	19.5344	22.202	7.48761	8.5375	6.14594	16.8939	cis
17499676	2610005L07Rik	cadherin 11 pseudogene	381598	chr8	+	20.584	20.585	UNC14291638	chr8	21.8926	19.5344	22.202	7.58721	8.69641	6.23199	16.3782	cis
17240819	Cep85l	centrosomal protein 85-like	100038725	chr10	-	53.2782	53.3797	UNC17969317	chr10	53.1013	52.0418	55.5231	7.52702	8.53766	6.22936	12.3072	cis
17240840	Mcm9	minichromosome maintenance 9 homologous recombination repair factor	71567	chr10	-	53.5365	53.6304	UNC17969317	chr10	53.1013	52.8031	55.5231	7.38218	8.20598	6.20116	17.6861	cis
17240858	Fam184a	family with sequence similarity 184, member A	75906	chr10	-	53.6335	53.7509	UNC17969317	chr10	53.1013	51.9591	56.0251	7.45097	8.40177	6.18468	17.1813	cis
17499808	Defb1	defensin beta 1	13214	chr8	+	21.7766	21.7951	JAX00159573	chr8	21.8237	15.0151	22.1346	7.46866	8.28266	6.17251	10.9545	cis
17499857	Vps36	vacuolar protein sorting 36	70160	chr8	+	22.1929	22.2201	UNC080079721	chr8	22.1346	17.1196	22.4521	7.46148	8.28833	6.23309	13.2652	cis
17499874	Thsd1	thrombospondin, type I, domain 1	56229	chr8	+	22.2273	22.2613	UNC14297639	chr8	22.2641	22.1674	22.4521	7.3637	8.12016	6.15611	30.598	cis
17499932	Slc20a2	solute carrier family 20, member 2	20516	chr8	+	22.4769	22.5689	UNC14305521	chr8	22.8315	22.384	24.3062	7.63387	8.5554	6.26295	8.52177	cis
17500068	Sfrp1	secreted frizzled-related protein 1	20377	chr8	+	23.4115	23.4493	UNC14303128	chr8	22.6712	17.0337	23.2947	7.51388	8.1994	6.21699	8.78563	cis
17500097	Tm2d2	TM2 domain containing 2	69742	chr8	+	25.0173	25.0232	JAX00663138	chr8	22.9838	22.6259	28.0444	7.42677	8.14828	6.24883	7.6539	cis
17500263	Thap1	THAP domain containing, apoptosis associated protein 1	73754	chr8	+	26.1582	26.1637	UNC14350065	chr8	26.2012	24.3794	28.4325	7.56569	8.58077	6.21731	8.67955	cis
17500289	Plpbp	pyridoxal phosphate binding protein	114863	chr8	+	27.0426	27.0548	UNC14354763	chr8	26.4868	26.4018	27.7997	7.46444	8.35388	6.18412	32.3406	cis
17500327	Eif4ebp1	eukaryotic translation initiation factor 4E binding protein 1	13685	chr8	+	27.2605	27.2756	UNC14361572	chr8	26.9492	25.4103	27.8108	7.57156	8.41706	6.24202	32.8819	cis
17500401	Tti2	TELO2 interacting protein 2	234138	chr8	+	31.1503	31.1643	UNC14424108	chr8	31.2991	30.5335	31.8791	7.53737	8.14012	6.21577	21.9871	cis
17500468	Ppp2cb	protein phosphatase 2 (formerly 2A), catalytic subunit, beta isoform	19053	chr8	+	33.5997	33.6195	UNC14510156	chr8	36.3829	33.6237	36.469	7.45454	8.36177	6.23021	11.2772	cis
17500478	Gsr	glutathione reductase	14782	chr8	+	33.6532	33.698	UNC14465044	chr8	33.8627	33.4334	34.574	7.42378	8.29148	6.16642	18.2291	cis
17500523	Saraf	store-operated calcium entry-associated regulatory factor	67887	chr8	+	34.1546	34.1707	UNC14475226	chr8	34.4465	32.8859	34.574	7.52002	8.46652	6.14047	9.32664	cis
17500543	Ppp1r3b	protein phosphatase 1, regulatory (inhibitor) subunit 3B	244416	chr8	+	35.3757	35.3878	UNC080674985	chr8	34.7421	33.7733	36.314	7.53296	8.77222	6.22908	9.00249	cis
17500551	Mfhas1	malignant fibrous histiocytoma amplified sequence 1	52065	chr8	+	35.5878	35.6783	JAX00665762	chr8	35.9976	33.012	36.5391	7.41866	8.36181	6.16506	8.9892	cis
17500605	6430573F11Rik	RIKEN cDNA 6430573F11 gene	319582	chr8	+	36.4576	36.5134	UNC14511801	chr8	36.469	36.1703	37.0219	7.37484	8.67239	6.15816	20.9733	cis
17500620	AI429214	expressed sequence AI429214	621080	chr8	+	36.9936	36.9954	UNC14567697	chr8	40.0233	36.4917	40.7026	7.51262	8.47136	6.21734	8.94083	cis
17500626	Tusc3	tumor suppressor candidate 3	80286	chr8	+	39.0059	39.1651	UNC14542364	chr8	38.2996	34.4767	51.1352	7.49115	8.27715	6.28451	8.62946	cis
17500679	Vps37a	vacuolar protein sorting 37A	52348	chr8	+	40.5118	40.5488	UNC14581814	chr8	41.0675	40.2993	42.9358	7.48611	8.37167	6.18594	24.7539	cis
17500756	Gm16348	predicted gene 16348	102640962	chr8	+	41.2181	41.2207	JAX00161038	chr8	41.3779	41.016	41.4459	7.42946	8.27564	6.148	56.0856	cis
17500761	Pcm1	pericentriolar material 1	18536	chr8	+	41.2398	41.3335	UNC14609155	chr8	42.9358	37.5681	43.2229	7.58474	8.4429	6.23818	10.7662	cis
17500867	Mtnr1a	melatonin receptor 1A	17773	chr8	+	45.0692	45.0884	JAX00667400	chr8	45.3843	45.0434	46.6379	7.40405	8.15004	6.16458	16.976	cis
17500922	Pdlim3	PDZ and LIM domain 3	53318	chr8	+	45.8855	45.9194	UNC14610469	chr8	43.0055	40.1589	47.1992	7.45166	8.3774	6.1764	8.44796	cis
17500941	Ufsp2	UFM1-specific peptidase 2	192169	chr8	+	45.9755	45.9969	UNC14637676	chr8	45.0802	43.1021	48.8825	7.56889	8.60505	6.23998	10.0548	cis
17500957	Lrp2bp	Lrp2 binding protein	67620	chr8	+	45.9994	46.0289	UNC14658207	chr8	46.4744	44.4477	46.5773	7.40459	8.47802	6.20916	14.733	cis
17500975	Cfap97	cilia and flagella associated protein 97	66756	chr8	+	46.1518	46.1955	UNC14658207	chr8	46.4744	45.3843	48.785	7.6063	8.17803	6.30489	8.56079	cis
17501041	Casp3	caspase 3	12367	chr8	+	46.6175	46.6387	UNC14712753	chr8	50.3399	46.4106	52.9961	7.42401	8.29379	6.26504	14.7024	cis
17501050	Irf2	interferon regulatory factor 2	16363	chr8	+	46.7398	46.8471	UNC14659656	chr8	46.5773	45.6515	48.8948	7.48547	8.43953	6.19123	21.6581	cis
17501148	Aga	aspartylglucosaminidase	11593	chr8	+	53.5117	53.5233	UNC14753764	chr8	53.1207	52.7865	56.5305	7.54215	8.23691	6.20376	24.2974	cis
17501160	Vegfc	vascular endothelial growth factor C	22341	chr8	+	54.0775	54.1863	UNC14754544	chr8	53.1937	48.8948	58.0614	7.51078	8.57798	6.21549	9.07252	cis
17501191	Gpm6a	glycoprotein m6a	234267	chr8	+	54.7796	55.0599	UNC080229115	chr8	53.6649	49.0082	56.4498	7.45603	8.3211	6.2221	9.13602	cis
17501250	Hpgd	hydroxyprostaglandin dehydrogenase 15 (NAD)	15446	chr8	+	56.2946	56.3203	UNC14786625	chr8	56.221	49.7066	56.9814	7.55126	8.48636	6.28891	8.93417	cis
17501288	2500002B13Rik	RIKEN cDNA 2500002B13 gene	78353	chr8	+	57.4881	57.5083	UNC14801823	chr8	57.5218	56.9576	57.6417	7.57707	8.63359	6.15217	20.323	cis
17501346	Mfap3l	microfibrillar-associated protein 3-like	71306	chr8	+	60.6329	60.6756	UNC14844083	chr8	60.548	52.7865	62.1017	7.61588	8.19255	6.24127	8.6825	cis
17501354	Hpf1	histone PARylation factor 1	72612	chr8	+	60.8937	60.9075	UNC14804070	chr8	57.6835	56.221	61.51	7.47283	8.50709	6.23409	11.5709	cis
17501408	Sh3rf1	SH3 domain containing ring finger 1	59009	chr8	+	61.2239	61.3949	UNC14807497	chr8	57.897	57.7066	61.5439	7.62353	8.30991	6.15515	15.77	cis
17501520	43525	membrane-associated ring finger (C3HC4) 1	72925	chr8	+	65.6179	66.4706	UNC14885514	chr8	63.6803	50.2797	68.8003	7.54683	8.49875	6.21808	8.64207	cis
17240901	Tbc1d32	TBC1 domain family, member 32	544696	chr10	-	56.0164	56.2246	JAX00018225	chr10	55.73	55.1954	57.612	7.48517	8.15795	6.16701	12.1791	cis
17241038	Anapc16	anaphase promoting complex subunit 16	52717	chr10	-	59.988	60.003	UNC18056706	chr10	60.5261	59.2403	60.6482	7.49579	8.14238	6.19141	22.0845	cis
17501609	Ints10	integrator complex subunit 10	70885	chr8	+	68.794	68.8288	UNC14956149	chr8	68.7361	68.1967	69.6626	7.57995	8.44284	6.24794	30.6632	cis
17501755	Pbx4	pre B cell leukemia homeobox 4	80720	chr8	+	69.8328	69.8729	JAX00671784	chr8	70.1561	69.6661	70.8526	7.65546	8.45688	6.25828	16.176	cis
17501818	Borcs8	BLOC-1 related complex subunit 8	72368	chr8	+	70.1395	70.1473	UNC14938850	chr8	67.5646	62.1017	70.7142	7.4087	8.51163	6.21596	11.6091	cis
17501994	Lsm4	LSM4 homolog, U6 small nuclear RNA and mRNA degradation associated	50783	chr8	+	70.6733	70.6787	JAX00671878	chr8	70.7481	70.1561	70.9024	7.47179	8.29635	6.17002	43.7363	cis
17502016	Pde4c	phosphodiesterase 4C, cAMP specific	110385	chr8	+	70.7237	70.7507	JAX00671878	chr8	70.7481	70.1561	71.4994	7.45281	8.09081	6.20122	22.3726	cis
17502049	2010320M18Rik	RIKEN cDNA 2010320M18 gene	72093	chr8	+	70.7769	70.7776	UNC080424354	chr8	70.7895	68.2312	72.8598	7.37634	8.45392	6.18691	8.85443	cis
17502157	Ocel1	occludin/ELL domain containing 1	77090	chr8	+	71.3713	71.3747	UNC14974761	chr8	70.9024	70.7895	71.4994	7.55811	8.47476	6.25711	43.4366	cis
17502168	Babam1	BRISC and BRCA1 A complex member 1	68251	chr8	+	71.3969	71.4047	UNC14969391	chr8	70.1431	68.6978	73.068	7.5122	8.39713	6.23514	11.2812	cis
17502191	Mrpl34	mitochondrial ribosomal protein L34	94065	chr8	+	71.465	71.4658	UNC14974761	chr8	70.9024	70.1561	76.2271	7.50703	8.45826	6.26746	11.2485	cis
17502206	Gtpbp3	GTP binding protein 3	70359	chr8	+	71.4884	71.4929	UNC14979864	chr8	71.6182	70.7895	71.9818	7.53948	8.78565	6.1451	26.2229	cis
17502221	Mvb12a	multivesicular body subunit 12A	73711	chr8	+	71.5429	71.548	UNC14978772	chr8	71.4994	71.3637	71.6651	7.53877	8.30829	6.21185	33.9947	cis
17502280	Colgalt1	collagen beta(1-O)galactosyltransferase 1	234407	chr8	+	71.611	71.6249	UNC14980714	chr8	71.7085	71.3637	71.9818	7.46897	8.6539	6.18382	9.21313	cis
17502330	Zfp709	zinc finger protein 709	236193	chr8	+	71.8821	71.8925	UNC14990542	chr8	73.0003	71.7085	76.0529	7.45976	8.54385	6.19597	10.0214	cis
17502342	Zfp617	zinc finger protein 617	170938	chr8	+	71.9229	71.9346	UNC14957804	chr8	68.8577	65.2302	73.0003	7.59636	8.67015	6.176	7.76764	cis
17502390	Rab8a	RAB8A, member RAS oncogene family	17274	chr8	+	72.1613	72.1838	JAX00163348	chr8	72.5014	71.5678	74.5813	7.49427	8.28291	6.21763	8.07394	cis
17502423	Ap1m1	adaptor-related protein complex AP-1, mu subunit 1	11767	chr8	+	72.24	72.2573	UNC14981260	chr8	71.7698	71.3637	74.5813	7.35014	8.09817	6.21375	13.3256	cis
17502445	1700030K09Rik	RIKEN cDNA 1700030K09 gene	72254	chr8	+	72.4439	72.461	UNC14989179	chr8	72.8598	70.7895	73.0003	7.50955	8.58297	6.22496	12.1966	cis
17502603	Rasd2	RASD family, member 2	75141	chr8	+	75.214	75.2238	JAX00163521	chr8	74.8135	72.8598	78.1385	7.55314	8.45348	6.26751	15.5612	cis
17502650	Prmt9	protein arginine methyltransferase 9	102182	chr8	+	77.5495	77.5813	UNC15023824	chr8	76.0543	72.8598	82.423	7.43554	8.68968	6.17432	9.46454	cis
17502714	Slc10a7	solute carrier family 10 (sodium/bile acid cotransporter family), member 7	76775	chr8	+	78.5094	78.7323	UNC081143045	chr8	78.2983	78.2649	78.8632	7.58421	8.38691	6.19681	14.6333	cis
17502750	Gm4890	predicted gene 4890	234479	chr8	+	79.2951	79.3075	UNC15070269	chr8	79.2791	78.802	82.0441	7.42141	8.37521	6.14761	14.4618	cis
17503118	Mir27a	microRNA 27a	387220	chr8	+	84.2087	84.2087	UNC15149618	chr8	85.3858	84.0898	88.0132	7.56283	8.29268	6.231	9.72305	cis
17503122	Cacna1a	calcium channel, voltage-dependent, P/Q type, alpha 1A subunit	12286	chr8	+	84.4156	84.64	UNC15139950	chr8	84.5085	84.1381	84.757	7.42036	8.36085	6.12485	42.2934	cis
17503181	Trmt1	tRNA methyltransferase 1	212528	chr8	+	84.6891	84.6998	UNC15115004	chr8	82.6177	79.3697	84.757	7.41184	8.17285	6.1906	8.37047	cis
17503217	Gadd45gip1	growth arrest and DNA-damage-inducible, gamma interacting protein 1	102060	chr8	+	84.8317	84.8354	UNC15156105	chr8	85.8731	84.648	86.2687	7.45596	8.10462	6.17488	28.2566	cis
17503245	Syce2	synaptonemal complex central element protein 2	71846	chr8	+	84.8721	84.888	UNC15153385	chr8	85.6478	84.648	87.2361	7.41032	8.18121	6.18258	37.636	cis
17503254	Klf1	Kruppel-like factor 1 (erythroid)	16596	chr8	+	84.9019	84.9053	UNC15149618	chr8	85.3858	84.1381	86.2286	7.49782	8.30544	6.21601	19.0153	cis
17503260	Dnase2a	deoxyribonuclease II alpha	13423	chr8	+	84.9087	84.9228	UNC080312390	chr8	86.076	84.648	88.0132	7.50528	8.48715	6.15679	12.9639	cis
17503300	Hook2	hook microtubule tethering protein 2	170833	chr8	+	84.9907	85.0033	UNC15135218	chr8	84.1381	83.5914	84.8122	7.50982	8.47025	6.18999	23.6586	cis
17503362	Fbxw9	F-box and WD-40 domain protein 9	68628	chr8	+	85.0601	85.0671	UNC15149618	chr8	85.3858	83.2074	87.4351	7.41281	8.15931	6.1469	13.3852	cis
17503377	Dhps	deoxyhypusine synthase	330817	chr8	+	85.0718	85.0751	UNC15142800	chr8	84.8122	84.1875	87.2689	7.39098	8.35206	6.17599	8.9768	cis
17503389	Wdr83os	WD repeat domain 83 opposite strand	414077	chr8	+	85.0807	85.0823	JAX00674531	chr8	84.757	83.2074	87.4351	7.50018	8.48467	6.16621	9.80539	cis
17503397	Man2b1	mannosidase 2, alpha B1	17159	chr8	+	85.0833	85.0982	UNC080312390	chr8	86.076	83.2074	87.5454	7.47871	8.44254	6.24349	10.7346	cis
17503431	Orc6	origin recognition complex, subunit 6	56452	chr8	+	85.2998	85.3082	JAX00674531	chr8	84.757	83.2074	87.4049	7.47821	8.40739	6.18319	14.3108	cis
17503446	Gpt2	glutamic pyruvate transaminase (alanine aminotransferase) 2	108682	chr8	+	85.4926	85.5274	UNC15143862	chr8	84.9522	84.5958	93.1751	7.50628	8.23874	6.2016	10.0532	cis
17503705	Gm3134	predicted gene 3134	100041089	chr8	+	89.0413	89.0576	UNC15223027	chr8	90.3424	87.3516	91.6578	7.55674	8.5268	6.21138	9.28955	cis
17503708	Chd9	chromodomain helicase DNA binding protein 9	109151	chr8	+	90.8289	91.0527	UNC15227064	chr8	90.611	89.3221	91.5673	7.51801	8.37805	6.17726	8.32072	cis
17503784	Fto	fat mass and obesity associated	26383	chr8	+	91.3136	91.6669	UNC15247408	chr8	92.0157	90.3424	92.3854	7.38987	8.25522	6.15401	11.8206	cis
17503825	Mmp2	matrix metallopeptidase 2	17390	chr8	+	92.8274	92.8529	JAX00676629	chr8	92.7918	92.7425	93.8444	7.4082	8.12924	6.22093	9.26033	cis
17241181	Adamts14	a disintegrin-like and metallopeptidase (reprolysin type) with thrombospondin type 1 motif, 14	237360	chr10	-	61.1978	61.2734	JAX00290990	chr10	63.9486	60.8404	64.9586	7.6824	8.5627	6.24193	8.92944	cis
17241206	Pald1	phosphatase domain containing, paladin 1	27355	chr10	-	61.32	61.356	UNC18065945	chr10	61.2421	60.6482	62.4001	7.54399	8.32476	6.21692	17.6604	cis
17241308	Tspan15	tetraspanin 15	70423	chr10	-	62.1867	62.2311	UNC18085049	chr10	62.8058	58.9424	69.1252	7.53508	8.58996	6.18375	8.10876	cis
17241454	Ddx50	DEAD (Asp-Glu-Ala-Asp) box polypeptide 50	94213	chr10	-	62.6159	62.6512	UNC18077773	chr10	62.1289	57.1255	64.2495	7.4864	8.45704	6.1609	9.78876	cis
17504074	Cpne2	copine II	234577	chr8	+	94.533	94.5703	UNC15288670	chr8	94.7448	93.4356	95.712	7.53313	8.4104	6.18932	7.55321	cis
17504190	Adgrg1	adhesion G protein-coupled receptor G1	14766	chr8	+	94.9771	95.0132	UNC15291032	chr8	94.9417	94.9233	95.6533	7.5465	8.3748	6.1839	22.3525	cis
17504207	Adgrg3	adhesion G protein-coupled receptor G3	54672	chr8	+	95.0177	95.0451	JAX00165072	chr8	95.524	94.9251	95.6533	7.51401	8.73807	6.20734	19.7873	cis
17504281	Usb1	U6 snRNA biogenesis 1	101985	chr8	+	95.3323	95.3469	UNC15290952	chr8	94.9362	94.922	95.5619	7.4917	8.43683	6.16924	20.4702	cis
17504293	Mmp15	matrix metallopeptidase 15	17388	chr8	+	95.3523	95.3743	UNC15297770	chr8	95.6077	92.7782	95.7005	7.43609	8.36123	6.21073	8.38711	cis
17504350	Setd6	SET domain containing 6	66083	chr8	+	95.7161	95.7189	UNC15298925	chr8	95.702	94.0481	97.8961	7.4739	8.19538	6.17559	12.3483	cis
17504399	Cdh5	cadherin 5	12562	chr8	+	104.102	104.144	UNC15421945	chr8	104.263	103.884	105.945	7.64164	8.50495	6.2101	10.3022	cis
17504454	Car7	carbonic anhydrase 7	12354	chr8	+	104.535	104.55	JAX00679456	chr8	106.399	104.02	106.738	7.44761	8.27919	6.11502	13.9422	cis
17504472	1700082M22Rik	RIKEN cDNA 1700082M22 gene	105243269	chr8	+	104.642	104.659	UNC15418067	chr8	103.99	103.937	107.972	7.63748	8.66636	6.14867	12.8921	cis
17504477	Ces2a	carboxylesterase 2A	102022	chr8	+	104.734	104.742	UNC15429461	chr8	104.994	103.941	105.085	7.52851	8.45095	6.2771	15.0951	cis
17504495	Ces2b	carboxyesterase 2B	234669	chr8	+	104.832	104.839	UNC15422872	chr8	104.369	104.075	105.085	7.49804	8.152	6.18286	76.6687	cis
17504541	Ces2e	carboxylesterase 2E	234673	chr8	+	104.926	104.935	JAX00165719	chr8	104.132	104.02	104.34	7.56214	8.39903	6.23906	19.9558	cis
17504572	Ces2g	carboxylesterase 2G	72361	chr8	+	104.962	104.969	UNC15419501	chr8	104.075	104.02	104.369	7.59197	8.56174	6.2381	16.8595	cis
17504587	Ces2h	carboxylesterase 2H	436059	chr8	+	105.001	105.019	UNC15422538	chr8	104.34	104.263	104.369	7.5211	8.33571	6.24764	68.7092	cis
17504688	Hsf4	heat shock transcription factor 4	26386	chr8	+	105.27	105.276	UNC15448758	chr8	106.961	104.02	108.138	7.54247	8.52476	6.19303	8.77719	cis
17504751	Tmem208	transmembrane protein 208	66320	chr8	+	105.326	105.335	UNC080382463	chr8	107.209	105.057	108.186	7.55607	8.89943	6.20136	8.36113	cis
17505170	Tango6	transport and golgi organization 6	272538	chr8	+	106.683	106.851	UNC15448290	chr8	106.907	104.424	107.972	7.54813	8.30551	6.18979	23.7637	cis
17505215	Sntb2	syntrophin, basic 2	20650	chr8	+	106.936	107.014	UNC15443038	chr8	106.457	105.286	107.688	7.54043	8.62033	6.21048	33.3235	cis
17505239	Nip7	NIP7, nucleolar pre-rRNA processing protein	66164	chr8	+	107.057	107.061	UNC15453345	chr8	107.412	105.057	108.539	7.58559	8.27507	6.19568	14.9355	cis
17505367	Txnl4b	thioredoxin-like 4B	234723	chr8	+	109.566	109.574	UNC15486496	chr8	110.118	106.676	110.349	7.55322	8.59711	6.14767	8.89058	cis
17505426	Ap1g1	adaptor protein complex AP-1, gamma 1 subunit	11765	chr8	+	109.779	109.861	UNC15474115	chr8	109.095	108.171	110.57	7.44425	8.17661	6.15286	12.5559	cis
17505774	Gabarapl2	gamma-aminobutyric acid (GABA) A receptor-associated protein-like 2	93739	chr8	+	111.941	111.954	UNC15493500	chr8	110.919	110.382	114.372	7.45979	8.6919	6.16205	10.8862	cis
17505782	Terf2ip	telomeric repeat binding factor 2, interacting protein	57321	chr8	+	112.011	112.02	UNC15497670	chr8	111.426	110.919	112.157	7.60866	8.46636	6.21526	34.9105	cis
17505826	Mon1b	MON1 homolog B, secretory traffciking associated	270096	chr8	+	113.636	113.645	JAX00680687	chr8	113.557	112.534	113.823	7.47458	8.27353	6.17849	23.4003	cis
17505851	Nudt7	nudix (nucleoside diphosphate linked moiety X)-type motif 7	67528	chr8	+	114.134	114.152	JAX00166447	chr8	113.858	113.823	114.372	7.59929	8.4396	6.15828	17.8993	cis
17505881	Wwox	WW domain-containing oxidoreductase	80707	chr8	+	114.44	115.353	UNC15539945	chr8	114.399	114.346	114.873	7.4175	8.24015	6.24896	11.71	cis
17506030	Hsd17b2	hydroxysteroid (17-beta) dehydrogenase 2	15486	chr8	+	117.702	117.759	UNC15593290	chr8	117.737	117.541	117.76	7.43045	8.35643	6.23393	21.6417	cis
17506042	Cdh13	cadherin 13	12554	chr8	+	118.284	119.325	JAX00681915	chr8	118.645	118.344	118.837	7.50163	8.21154	6.15959	17.8408	cis
17506067	Hsbp1	heat shock factor binding protein 1	68196	chr8	+	119.345	119.349	UNC15615600	chr8	119.231	118.66	119.842	7.41053	8.31155	6.24652	19.3053	cis
17506095	Necab2	N-terminal EF-hand calcium binding protein 2	117148	chr8	+	119.447	119.473	UNC15575375	chr8	116.613	116.089	119.46	7.69012	9.03994	6.29009	9.13814	cis
17506177	Klhl36	kelch-like 36	234796	chr8	+	119.862	119.877	UNC15629444	chr8	120.14	115.136	120.334	7.60316	8.38577	6.24637	8.67629	cis
17506184	Usp10	ubiquitin specific peptidase 10	22224	chr8	+	119.911	119.957	UNC15629444	chr8	120.14	119.231	120.609	7.54466	8.56302	6.19591	11.6832	cis
17506270	Gm10614	predicted gene 10614	100038388	chr8	+	120.59	120.594	UNC15637699	chr8	120.848	120.578	120.909	7.58039	8.60451	6.25208	17.6554	cis
17506291	Foxf1	forkhead box F1	15227	chr8	+	121.085	121.087	JAX00682343	chr8	121.468	120.79	124.337	7.59692	8.56214	6.2286	12.0598	cis
17506356	Zfpm1	zinc finger protein, multitype 1	22761	chr8	+	122.282	122.337	UNC15660598	chr8	122.332	121.148	124.337	7.56088	8.41739	6.21675	7.8409	cis
17506369	Zc3h18	zinc finger CCCH-type containing 18	76014	chr8	+	122.377	122.417	UNC15663869	chr8	122.575	121.485	124.337	7.41648	8.32645	6.154	8.76321	cis
17506398	9330133O14Rik	RIKEN cDNA 9330133O14 gene	100689703	chr8	+	122.444	122.446	backupUNC080395551	chr8	122.462	121.148	123.302	7.50702	8.46202	6.19497	20.5806	cis
17506400	Ctu2	cytosolic thiouridylase subunit 2	66965	chr8	+	122.476	122.483	UNC15663869	chr8	122.575	121.133	124.834	7.55962	8.30345	6.23741	13.6262	cis
17241604	Lrrtm3	leucine rich repeat transmembrane neuronal 3	216028	chr10	-	63.9285	64.0902	backupJAX00290713	chr10	61.8465	58.8739	64.9024	7.60882	8.65268	6.34264	16.2508	cis
17241623	Reep3	receptor accessory protein 3	28193	chr10	-	67.0104	67.0968	JAX00291445	chr10	66.901	66.2393	67.5327	7.40716	8.28181	6.22162	25.543	cis
17241637	Nrbf2	nuclear receptor binding factor 2	641340	chr10	-	67.267	67.2853	UNC18147690	chr10	67.7819	61.7864	68.17	7.59105	8.75844	6.24983	8.32114	cis
17241643	Ado	2-aminoethanethiol (cysteamine) dioxygenase	211488	chr10	-	67.5447	67.5486	UNC18144004	chr10	67.5327	67.5065	67.962	7.5253	8.38904	6.20726	13.3245	cis
17506431	Trappc2l	trafficking protein particle complex 2-like	59005	chr8	+	122.612	122.616	UNC15666737	chr8	122.754	122.471	123.39	7.50918	8.3088	6.20338	18.6857	cis
17506443	Acsf3	acyl-CoA synthetase family member 3	257633	chr8	+	122.776	122.818	UNC15667304	chr8	122.799	122.498	123.775	7.44134	8.54141	6.2192	13.609	cis
17506479	Spg7	SPG7, paraplegin matrix AAA peptidase subunit	234847	chr8	+	123.063	123.098	UNC15678694	chr8	123.775	121.148	125.167	7.57195	8.71709	6.25806	7.90692	cis
17506532	Dpep1	dipeptidase 1 (renal)	13479	chr8	+	123.186	123.202	JAX00682838	chr8	123.223	122.754	123.775	7.4311	8.22913	6.19681	12.9652	cis
17506551	Cdk10	cyclin-dependent kinase 10	234854	chr8	+	123.225	123.232	JAX00682838	chr8	123.223	122.754	123.817	7.41256	8.13277	6.21783	12.3	cis
17506603	Tcf25	transcription factor 25 (basic helix-loop-helix)	66855	chr8	+	123.374	123.404	UNC15675864	chr8	123.463	123.252	123.683	7.47063	8.41566	6.18652	20.4787	cis
17506639	Def8	differentially expressed in FDCP 8	23854	chr8	+	123.443	123.463	UNC15676031	chr8	123.479	123.345	123.775	7.49289	8.44829	6.16835	51.4793	cis
17506661	Afg3l1	AFG3-like AAA ATPase 1	114896	chr8	+	123.478	123.503	UNC15677222	chr8	123.683	123.264	123.817	7.44682	8.31068	6.18871	18.8816	cis
17506697	Rhou	ras homolog family member U	69581	chr8	+	123.654	123.663	UNC15665883	chr8	122.705	122.471	123.86	7.49647	8.45875	6.21259	7.99715	cis
17506707	Rab4a	RAB4A, member RAS oncogene family	19341	chr8	+	123.834	123.835	UNC15685083	chr8	124.173	123.479	124.42	7.594	8.74819	6.22244	11.1349	cis
17506720	Urb2	URB2 ribosome biogenesis 2 homolog (S. cerevisiae)	382038	chr8	+	124.023	124.048	UNC15677222	chr8	123.683	123.252	124.337	7.59181	8.88109	6.20962	15.4572	cis
17506824	Gnpat	glyceronephosphate O-acyltransferase	14712	chr8	+	124.863	124.89	UNC15693202	chr8	124.559	124.457	125.167	7.53039	8.37376	6.19976	17.4348	cis
17506854	Tsnax	translin-associated factor X	53424	chr8	+	125.013	125.034	UNC080549794	chr8	125.195	123.479	126.139	7.39503	8.29604	6.20269	19.6738	cis
17506888	Map10	microtubule-associated protein 10	74393	chr8	+	125.67	125.673	UNC15714380	chr8	125.973	124.049	126.59	7.60831	8.51141	6.22288	8.33119	cis
17506891	Ntpcr	nucleoside-triphosphatase, cancer-related	66566	chr8	+	125.73	125.748	UNC15705878	chr8	125.459	121.189	126.59	7.54676	8.39819	6.23407	8.9296	cis
17506904	Map3k21	mitogen-activated protein kinase kinase kinase 21	234878	chr8	+	125.91	125.947	UNC15714179	chr8	125.96	124.93	126.59	7.39911	8.13584	6.13104	9.0859	cis
17506933	Coa6	cytochrome c oxidase assembly factor 6	67892	chr8	+	126.423	126.425	UNC15724557	chr8	126.59	125.195	127.429	7.42613	8.42238	6.17355	11.6772	cis
17506938	Irf2bp2	interferon regulatory factor 2 binding protein 2	270110	chr8	+	126.567	126.591	UNC15742674	chr8	128.039	124.93	129.185	7.40608	8.35566	6.23478	8.19988	cis
17507014	Itgb1	integrin beta 1 (fibronectin receptor beta)	16412	chr8	+	128.686	128.732	UNC15751784	chr8	129.114	127.712	129.185	7.51263	8.35827	6.15967	8.39808	cis
17507057	Insr	insulin receptor	16337	chr8	-	3.15398	3.27958	JAX00659376	chr8	3.95595	3.21146	8.40618	7.37158	8.27744	6.19449	14.7287	cis
17507094	Xab2	XPA binding protein 2	67439	chr8	-	3.61016	3.62127	JAX00659454	chr8	4.47106	3.21146	31.9806	7.45487	8.3665	6.19138	9.13229	cis
17507128	Fcor	Foxo1 corepressor	100503924	chr8	-	3.67119	3.6723	JAX00659337	chr8	3.68157	3.21146	5.46234	7.48338	8.51513	6.20437	12.5488	cis
17507148	Clec4g	C-type lectin domain family 4, member g	75863	chr8	-	3.7162	3.72064	JAX00659365	chr8	3.87421	3.21146	7.08959	7.59895	8.60027	6.23182	12.782	cis
17507161	Cd209a	CD209a antigen	170786	chr8	-	3.74366	3.74897	UNC080007365	chr8	4.50706	3.21146	8.54599	7.5112	8.24245	6.2541	9.5248	cis
17507194	Cd209b	CD209b antigen	69165	chr8	-	3.9177	3.92678	UNC14067338	chr8	4.89441	3.21146	5.46234	7.41077	8.23107	6.21838	61.4336	cis
17507308	Slc10a2	solute carrier family 10, member 2	20494	chr8	-	5.08567	5.10523	backupJAX00659559	chr8	5.52466	3.21146	8.50807	7.57007	8.29831	6.17039	9.75913	cis
17507440	Cars2	cysteinyl-tRNA synthetase 2 (mitochondrial)(putative)	71941	chr8	-	11.5141	11.5507	UNC14153518	chr8	10.8509	8.50807	12.9542	7.36541	8.14	6.15278	9.37371	cis
17507490	Tubgcp3	tubulin, gamma complex associated protein 3	259279	chr8	-	12.6147	12.6722	UNC14182753	chr8	12.8993	9.64973	13.3146	7.53671	8.35988	6.16491	10.6692	cis
17507537	Pcid2	PCI domain containing 2	234069	chr8	-	13.0773	13.1054	UNC14174320	chr8	12.3015	10.9226	13.4768	7.58139	8.58629	6.21251	8.52323	cis
17507559	Grtp1	GH regulated TBC protein 1	66790	chr8	-	13.1756	13.2006	UNC14188992	chr8	13.3146	12.1093	13.574	7.44226	8.20385	6.17481	16.42	cis
17507637	Rasa3	RAS p21 protein activator 3	19414	chr8	-	13.5671	13.6775	UNC14192828	chr8	13.574	12.8993	14.4986	7.56644	8.33852	6.19039	14.6196	cis
17507668	Coprs	coordinator of PRMT5, differentiation stimulator	66423	chr8	-	13.8848	13.8878	JAX00661344	chr8	13.4391	12.8993	14.4748	7.51002	8.24721	6.20013	14.5393	cis
17507682	Erich1	glutamate rich 1	234086	chr8	-	14.0277	14.0789	UNC080463080	chr8	14.3671	12.2107	14.8479	7.42494	8.28439	6.19824	20.8448	cis
17507872	2610005L07Rik	cadherin 11 pseudogene	381598	chr8	-	20.3863	20.3879	backupUNC080079599	chr8	21.9755	19.5344	22.202	7.38625	8.45791	6.21172	21.1063	cis
17507955	Atp7b	ATPase, Cu++ transporting, beta polypeptide	11979	chr8	-	21.9932	22.0601	UNC14287667	chr8	19.5344	17.0535	22.1208	7.53709	8.43486	6.15273	16.5953	cis
17507982	Nek5	NIMA (never in mitosis gene a)-related expressed kinase 5	330721	chr8	-	22.0737	22.125	UNC14299130	chr8	22.384	22.0728	22.6259	7.65161	8.67427	6.26035	12.2385	cis
17508006	Nek3	NIMA (never in mitosis gene a)-related expressed kinase 3	23954	chr8	-	22.1287	22.1664	UNC080079721	chr8	22.1346	22.0728	22.384	7.47538	8.57123	6.22463	19.1677	cis
17508045	Smim19	small integral membrane protein 19	102032	chr8	-	22.4627	22.4768	UNC14302472	chr8	22.6259	22.384	23.9059	7.47759	8.31306	6.15861	13.8345	cis
17508052	Vdac3	voltage-dependent anion channel 3	22335	chr8	-	22.5771	22.5938	JAX00663081	chr8	22.5611	22.384	22.8728	7.45808	8.13796	6.18547	9.26151	cis
17508082	Ikbkb	inhibitor of kappaB kinase beta	16150	chr8	-	22.6606	22.7065	UNC14303128	chr8	22.6712	17.8118	24.4221	7.34228	8.14935	6.16726	9.27351	cis
17508151	Gins4	GINS complex subunit 4 (Sld5 homolog)	109145	chr8	-	23.2268	23.2376	UNC14307442	chr8	23.0522	22.6712	23.2947	7.72294	8.48459	6.24827	40.4496	cis
17508161	Golga7	golgi autoantigen, golgin subfamily a, 7	57437	chr8	-	23.2416	23.257	UNC14313038	chr8	23.4365	22.5611	23.859	7.38361	8.25727	6.1672	19.8722	cis
17508174	Ido2	indoleamine 2,3-dioxygenase 2	209176	chr8	-	24.5323	24.5763	UNC14330857	chr8	24.6092	24.3315	25.1544	7.64866	8.20068	6.23194	7.92486	cis
17508300	Adam9	a disintegrin and metallopeptidase domain 9 (meltrin gamma)	11502	chr8	-	24.9498	25.0168	UNC14334951	chr8	25.0227	24.6092	25.6442	7.55969	8.77145	6.25144	7.8366	cis
17508325	Htra4	HtrA serine peptidase 4	330723	chr8	-	25.0251	25.039	UNC14340808	chr8	25.4103	24.3794	25.5057	7.47217	8.14267	6.21207	17.3229	cis
17508353	Tacc1	transforming, acidic coiled-coil containing protein 1	320165	chr8	-	25.1554	25.2014	UNC14332878	chr8	24.8431	24.3794	25.5057	7.49505	8.44968	6.17643	29.7943	cis
17508380	Letm2	leucine zipper-EF-hand containing transmembrane protein 2	270035	chr8	-	25.5786	25.5975	JAX00663663	chr8	25.5529	25.4103	26.7904	7.41671	8.50192	6.13714	28.2232	cis
17508416	Bag4	BCL2-associated athanogene 4	67384	chr8	-	25.7655	25.7851	UNC14343264	chr8	25.5975	25.4103	26.5886	7.52432	8.53834	6.17621	29.5305	cis
17241672	4930545H06Rik	RIKEN cDNA 4930545H06 gene	75148	chr10	-	68.3191	68.3211	UNC18155397	chr10	68.2743	68.2298	68.2991	7.43325	8.32148	6.17919	49.5391	cis
17241676	Cabcoco1	ciliary associated calcium binding coiled-coil 1	73287	chr10	-	68.4311	68.5418	UNC18155442	chr10	68.2852	68.1935	68.5718	7.49013	8.37498	6.21919	16.376	cis
17241756	C730027H18Rik	RIKEN cDNA C730027H18 gene	319572	chr10	-	71.1693	71.182	JAX00292001	chr10	69.6193	68.9253	76.0588	7.54143	8.27566	6.17279	8.41134	cis
17241765	Tfam	transcription factor A, mitochondrial	21780	chr10	-	71.2266	71.238	UNC18234040	chr10	74.1611	70.3137	75.645	7.47395	8.28415	6.23747	8.0096	cis
17241780	Ube2d1	ubiquitin-conjugating enzyme E2D 1	216080	chr10	-	71.2552	71.2623	JAX00292429	chr10	71.2288	71.0252	73.9515	7.4201	8.25364	6.21352	12.9264	cis
17508445	Hgsnat	heparan-alpha-glucosaminide N-acetyltransferase	52120	chr8	-	25.945	25.9767	UNC14345538	chr8	25.8927	25.2261	26.3084	7.50618	8.18942	6.23694	29.796	cis
17508464	Pomk	protein-O-mannose kinase	74653	chr8	-	25.9817	25.9941	UNC14351783	chr8	26.3084	25.1544	26.4018	7.52832	8.32891	6.20236	19.1386	cis
17508516	Brf2	BRF2, RNA polymerase III transcription initiation factor 50kDa subunit	66653	chr8	-	27.1238	27.1286	UNC14354763	chr8	26.4868	26.3433	28.0444	7.41602	8.52938	6.15302	13.3439	cis
17508523	Rab11fip1	RAB11 family interacting protein 1 (class I)	75767	chr8	-	27.1401	27.1746	UNC14374082	chr8	27.826	27.0329	28.8782	7.41921	8.75913	6.23749	18.3335	cis
17508544	Adrb3	adrenergic receptor, beta 3	11556	chr8	-	27.2259	27.2295	UNC14381524	chr8	28.4325	26.7513	30.7398	7.52177	8.57173	6.24972	9.5865	cis
17508593	Mak16	MAK16 homolog	67920	chr8	-	31.16	31.1687	UNC14476485	chr8	34.5043	32.7771	35.6036	7.53149	8.54941	6.209	8.90064	cis
17508633	Wrn	Werner syndrome RecQ like helicase	22427	chr8	-	33.2347	33.3855	UNC14464267	chr8	33.8243	32.8859	34.5371	7.49466	8.383	6.2155	12.0253	cis
17508706	Dctn6	dynactin 6	22428	chr8	-	34.0904	34.1087	UNC14482243	chr8	34.8127	31.9719	35.831	7.65356	8.40191	6.15536	14.1291	cis
17508722	Leprotl1	leptin receptor overlapping transcript-like 1	68192	chr8	-	34.1356	34.147	UNC14477100	chr8	34.5371	33.4334	35.0396	7.54392	8.31663	6.25111	17.6317	cis
17508775	Gm16793	predicted gene, 16793	100504714	chr8	-	35.5826	35.589	JAX00665762	chr8	35.9976	33.0815	36.4315	7.70536	8.52769	6.18608	14.2173	cis
17508885	Mtmr7	myotubularin related protein 7	54384	chr8	-	40.5512	40.6261	UNC14573363	chr8	40.4219	36.871	43.3376	7.51535	8.19019	6.28294	16.5289	cis
17508907	Mtus1	mitochondrial tumor suppressor 1	102103	chr8	-	40.992	41.1337	UNC14602704	chr8	42.4997	40.2993	43.2229	7.38501	8.3598	6.15837	16.1868	cis
17508949	Asah1	N-acylsphingosine amidohydrolase 1	11886	chr8	-	41.3402	41.3747	UNC14581814	chr8	41.0675	38.5433	43.4411	7.47109	8.07954	6.16551	9.95366	cis
17509052	Klkb1	kallikrein B, plasma 1	16621	chr8	-	45.2696	45.2948	JAX00667400	chr8	45.3843	37.992	47.1183	7.70844	8.5973	6.22806	13.4026	cis
17509069	Cyp4v3	cytochrome P450, family 4, subfamily v, polypeptide 3	102294	chr8	-	45.3064	45.3332	UNC14606506	chr8	42.7515	40.6204	46.4744	7.52499	8.51223	6.23124	9.5599	cis
17509083	Fam149a	family with sequence similarity 149, member A	212326	chr8	-	45.3374	45.3822	UNC14653235	chr8	46.0932	45.0434	46.5773	7.55947	8.62714	6.23058	15.9602	cis
17509127	1700029J07Rik	RIKEN cDNA 1700029J07 gene	69479	chr8	-	45.9536	45.9753	UNC080207603	chr8	46.2599	45.3843	48.1466	7.44575	8.30859	6.20932	9.76102	cis
17509146	Snx25	sorting nexin 25	102141	chr8	-	46.0336	46.1519	UNC14651086	chr8	45.9077	44.7599	46.5257	7.48189	8.29892	6.27267	9.93048	cis
17509208	Gm16675	predicted gene, 16675	100503498	chr8	-	46.731	46.7394	UNC14667431	chr8	47.0341	46.4106	50.2307	7.50267	8.00652	6.22844	13.585	cis
17509315	Tenm3	teneurin transmembrane protein 3	23965	chr8	-	48.2261	48.6747	UNC14683963	chr8	48.1187	45.0434	56.4498	7.40204	8.55563	6.18197	7.4167	cis
17509379	Spcs3	signal peptidase complex subunit 3 homolog (S. cerevisiae)	76687	chr8	-	54.5206	54.5299	UNC14788711	chr8	56.4151	50.0337	56.9293	7.49962	8.27278	6.14597	9.73469	cis
17509642	Klhl2	kelch-like 2, Mayven	77113	chr8	-	64.7407	64.8497	JAX00670529	chr8	63.7495	62.4628	65.0574	7.50912	8.31387	6.1783	29.4466	cis
17509723	Psd3	pleckstrin and Sec7 domain containing 3	234353	chr8	-	67.6923	68.0008	UNC14947237	chr8	68.1157	67.4977	68.2479	7.43128	8.26813	6.23686	17.6976	cis
17509780	Slc18a1	solute carrier family 18 (vesicular monoamine), member 1	110877	chr8	-	69.0387	69.0891	UNC14952356	chr8	68.4594	67.8801	70.7142	7.59502	8.75942	6.16856	25.8678	cis
17509809	Gm10033	predicted gene 10033	378466	chr8	-	69.3711	69.3955	JAX00163136	chr8	69.6626	68.6051	71.4396	7.51087	8.40879	6.21643	14.5233	cis
17509842	Zfp868	zinc finger protein 868	234362	chr8	-	69.6109	69.6255	UNC080247073	chr8	68.9845	68.2312	69.9601	7.45874	8.38421	6.20428	35.116	cis
17509851	Zfp869	zinc finger protein 869	66869	chr8	-	69.7054	69.7169	UNC14955643	chr8	68.6978	68.3435	69.6626	7.50631	8.48103	6.1689	21.6385	cis
17509859	Zfp963	zinc finger protein 963	620419	chr8	-	69.742	69.75	UNC14969391	chr8	70.1431	68.2312	70.8526	7.54927	8.15257	6.16687	21.5356	cis
17509907	Gatad2a	GATA zinc finger domain containing 2A	234366	chr8	-	69.9081	69.9963	UNC14974761	chr8	70.9024	50.2797	71.9818	7.33201	8.004	6.20623	8.01678	cis
17509964	Rfxank	regulatory factor X-associated ankyrin-containing protein	19727	chr8	-	70.131	70.1391	UNC14955643	chr8	68.6978	68.3327	70.7142	7.59978	8.65905	6.19233	22.5846	cis
17509985	Armc6	armadillo repeat containing 6	76813	chr8	-	70.2202	70.2345	UNC14973333	chr8	70.7142	68.7655	73.0003	7.52926	8.29496	6.20095	11.6959	cis
17510129	Mpv17l2	MPV17 mitochondrial membrane protein-like 2	234384	chr8	-	70.7587	70.7608	JAX00163281	chr8	71.5678	69.9674	73.0003	7.38439	8.06051	6.20119	9.95623	cis
17510223	Ccdc124	coiled-coil domain containing 124	234388	chr8	-	70.8682	70.8701	UNC14978267	chr8	71.4396	70.7895	71.6651	7.41118	8.26239	6.20016	24.7607	cis
17510345	Bst2	bone marrow stromal cell antigen 2	69550	chr8	-	71.5343	71.5374	JAX00163281	chr8	71.5678	71.3637	71.6651	7.62337	8.69287	6.21154	45.1897	cis
17510422	B3gnt3	UDP-GlcNAc:betaGal beta-1,3-N-acetylglucosaminyltransferase 3	72297	chr8	-	71.6908	71.7018	UNC14980333	chr8	71.6651	71.3637	71.9818	7.56063	8.3245	6.21632	19.2283	cis
17510462	Cyp4f18	cytochrome P450, family 4, subfamily f, polypeptide 18	72054	chr8	-	71.9885	72.0096	UNC14981260	chr8	71.7698	71.6182	76.1968	7.65537	8.40675	6.26438	8.34994	cis
17241849	Susd2	sushi domain containing 2	71733	chr10	-	75.637	75.6439	backupUNC100088273	chr10	75.645	74.9466	76.0588	7.49404	8.48832	6.18452	39.6971	cis
17241867	Cabin1	calcineurin binding protein 1	104248	chr10	-	75.6465	75.7641	UNC18258296	chr10	76.4211	68.2246	77.9748	7.44767	8.15883	6.19911	7.68387	cis
17241934	Gstt1	glutathione S-transferase, theta 1	14871	chr10	-	75.7838	75.7986	UNC18245269	chr10	75.1594	74.9466	76.0588	7.64219	8.61607	6.27293	36.8518	cis
17241954	Gstt2	glutathione S-transferase, theta 2	14872	chr10	-	75.8319	75.8348	JAX00293084	chr10	75.7143	74.8376	76.696	7.56077	8.85883	6.26604	9.60722	cis
17241962	Mif	macrophage migration inhibitory factor (glycosylation-inhibiting factor)	17319	chr10	-	75.8594	75.8602	UNC18254509	chr10	76.0588	74.9466	76.3346	7.63372	8.48807	6.21012	13.29	cis
17510578	Smim7	small integral membrane protein 7	66818	chr8	-	72.5656	72.5711	UNC14973333	chr8	70.7142	68.1342	73.068	7.58094	8.25137	6.23125	7.6725	cis
17510586	Large1	LARGE xylosyl- and glucuronyltransferase 1	16795	chr8	-	72.8146	73.3528	JAX00163521	chr8	74.8135	72.8598	78.1691	7.35537	8.13611	6.17188	15.1228	cis
17510667	Tmem184c	transmembrane protein 184C	234463	chr8	-	77.5961	77.6107	UNC15053433	chr8	78.0838	74.8135	78.2649	7.67021	8.67377	6.25016	10.7868	cis
17510707	Lsm6	LSM6 homolog, U6 small nuclear RNA and mRNA degradation associated	78651	chr8	-	78.8059	78.8211	UNC15069165	chr8	79.1732	78.2352	88.0132	7.62282	8.51911	6.20309	9.32978	cis
17510772	Hhip	Hedgehog-interacting protein	15245	chr8	-	79.9662	80.0579	UNC15069455	chr8	79.2064	78.802	82.4537	7.54927	8.23096	6.25609	9.5658	cis
17510836	Usp38	ubiquitin specific peptidase 38	74841	chr8	-	80.9813	81.0149	UNC15107165	chr8	82.0441	78.3133	82.4603	7.47866	8.34949	6.21968	19.5974	cis
17510856	Il15	interleukin 15	16168	chr8	-	82.3318	82.403	UNC15071277	chr8	79.3749	79.1732	80.9525	7.38819	8.22548	6.18909	19.8442	cis
17510906	Tecr	trans-2,3-enoyl-CoA reductase	106529	chr8	-	83.5717	83.5944	UNC15129366	chr8	83.5914	83.2074	85.9022	7.47298	8.14916	6.20462	22.0209	cis
17510994	Il27ra	interleukin 27 receptor, alpha	50931	chr8	-	84.0306	84.0426	UNC15134655	chr8	84.0898	78.1385	88.0132	7.48443	8.2807	6.20544	12.1367	cis
17511102	Mri1	methylthioribose-1-phosphate isomerase 1	67873	chr8	-	84.2503	84.2573	UNC15141751	chr8	84.648	83.1874	84.757	7.50009	8.40233	6.19672	24.5846	cis
17511167	Rad23a	RAD23 homolog A, nucleotide excision repair protein	19358	chr8	-	84.8341	84.8406	JAX00164455	chr8	87.2875	84.5085	87.6969	7.3168	7.89995	6.18345	18.3982	cis
17511296	Wdr83	WD repeat domain containing 83	67836	chr8	-	85.0752	85.0807	UNC15161488	chr8	86.2687	84.648	87.2361	7.50778	8.32498	6.1813	27.9041	cis
17511318	Vps35	VPS35 retromer complex component	65114	chr8	-	85.2607	85.2949	JAX00674531	chr8	84.757	83.2074	86.0582	7.42119	8.28228	6.21681	8.13165	cis
17511359	4921524J17Rik	RIKEN cDNA 4921524J17 gene	66714	chr8	-	85.4096	85.4328	UNC15177911	chr8	87.4049	84.1286	89.0943	7.47237	8.3248	6.17939	9.78474	cis
17511410	Abcc12	ATP-binding cassette, sub-family C (CFTR/MRP), member 12	244562	chr8	-	86.5048	86.5666	UNC080312390	chr8	86.076	77.6746	87.5454	7.51022	8.41189	6.24971	7.84554	cis
17511586	Rpgrip1l	Rpgrip1-like	244585	chr8	-	91.218	91.3132	UNC15241047	chr8	91.5673	90.0983	92.7308	7.53871	8.38394	6.24966	15.1285	cis
17511630	Crnde	colorectal neoplasia differentially expressed (non-protein coding)	71296	chr8	-	92.3262	92.3561	JAX00676399	chr8	92.2735	91.5164	93.1751	7.4358	8.35293	6.19822	11.2096	cis
17511660	Ces1b	carboxylesterase 1B	382044	chr8	-	93.0568	93.08	backupJAX00164884	chr8	93.0223	92.7918	93.1751	7.50293	8.67657	6.14193	54.7333	cis
17511677	Ces1c	carboxylesterase 1C	13884	chr8	-	93.1041	93.1309	UNC15259590	chr8	92.7782	92.7425	93.9262	7.44857	8.25181	6.17697	28.4578	cis
17511714	Ces1e	carboxylesterase 1E	13897	chr8	-	93.2014	93.2294	backupJAX00164884	chr8	93.0223	89.0634	95.7005	7.376	8.35903	6.18577	8.93374	cis
17511731	Ces1f	carboxylesterase 1F	234564	chr8	-	93.2563	93.2797	UNC080360144	chr8	93.4995	92.7425	94.7448	7.84717	9.10872	6.25347	11.5052	cis
17511748	Ces1g	carboxylesterase 1G	12623	chr8	-	93.3028	93.3373	UNC15271442	chr8	93.4356	92.7918	93.9665	7.49412	8.24344	6.20061	24.3579	cis
17511808	Amfr	autocrine motility factor receptor	23802	chr8	-	93.9722	94.0052	UNC15278738	chr8	93.9262	92.7425	94.8784	7.387	8.01576	6.21641	18.2534	cis
17511834	Bbs2	Bardet-Biedl syndrome 2 (human)	67378	chr8	-	94.0681	94.0988	UNC15283994	chr8	94.289	93.4356	94.9041	7.62099	8.6832	6.22317	19.6222	cis
17511860	9330175E14Rik	RIKEN cDNA 9330175E14 gene	320377	chr8	-	94.423	94.435	UNC15275535	chr8	93.694	92.7425	94.7847	7.54068	8.17841	6.22472	14.3211	cis
17511887	Ciapin1	cytokine induced apoptosis inhibitor 1	109006	chr8	-	94.8206	94.8383	JAX00676629	chr8	92.7918	90.3994	94.9251	7.60903	8.4572	6.19433	16.0538	cis
17511996	Zfp319	zinc finger protein 319	79233	chr8	-	95.3264	95.3318	UNC15332579	chr8	98.1699	94.9233	99.9566	7.46558	8.68227	6.20037	8.23016	cis
17512032	Cnot1	CCR4-NOT transcription complex, subunit 1	234594	chr8	-	95.7197	95.8074	UNC15299322	chr8	95.7684	95.6077	96.0903	7.45662	8.61989	6.2192	14.886	cis
17512088	Slc38a7	solute carrier family 38, member 7	234595	chr8	-	95.8362	95.8535	JAX00165072	chr8	95.524	94.7703	96.4506	7.45743	8.41217	6.17792	11.1149	cis
17512181	Tk2	thymidine kinase 2, mitochondrial	57813	chr8	-	104.228	104.249	UNC15419088	chr8	104.049	103.941	106.438	7.44408	8.25408	6.19148	17.7623	cis
17512275	Nae1	NEDD8 activating enzyme E1 subunit 1	234664	chr8	-	104.511	104.535	UNC15419501	chr8	104.075	104.02	105.268	7.50841	8.92513	6.21301	16.3089	cis
17512342	Tradd	TNFRSF1A-associated via death domain	71609	chr8	-	105.258	105.261	UNC15431879	chr8	105.258	104.02	107.972	7.48479	8.09992	6.18652	12.0876	cis
17512572	Slc12a4	solute carrier family 12, member 4	20498	chr8	-	105.944	105.966	JAX00679405	chr8	106.129	105.268	106.961	7.37817	8.28021	6.19955	7.63779	cis
17242376	Pfkl	phosphofructokinase, liver, B-type	18641	chr10	-	77.9871	78.0101	backupJAX00019859	chr10	77.897	77.4567	78.0557	7.67733	8.39736	6.16797	37.9426	cis
17512732	Nqo1	NAD(P)H dehydrogenase, quinone 1	18104	chr8	-	107.388	107.403	UNC15449774	chr8	107.063	106.676	108.004	7.4247	8.32129	6.19156	16.1945	cis
17512765	Lncbate1	brown adipose tissue enriched long non-coding RNA 1	109215	chr8	-	108.553	108.585	UNC15473044	chr8	109.024	108.581	109.058	7.49992	8.32281	6.20847	47.831	cis
17512780	Dhx38	DEAH (Asp-Glu-Ala-His) box polypeptide 38	64340	chr8	-	109.548	109.566	JAX00680064	chr8	110.11	108.16	110.349	7.50851	8.19996	6.17727	10.8895	cis
17512816	Dhodh	dihydroorotate dehydrogenase	56749	chr8	-	109.593	109.609	UNC15472720	chr8	109.004	108.16	110.57	7.48347	8.41141	6.22432	13.9958	cis
17512975	Ddx19a	DEAD (Asp-Glu-Ala-Asp) box polypeptide 19a	13680	chr8	-	110.975	110.998	UNC15506736	chr8	112.076	110.254	113.168	7.4009	8.2254	6.19255	12.0725	cis
17513135	Ldhd	lactate dehydrogenase D	52815	chr8	-	111.627	111.63	UNC15498116	chr8	111.465	109.174	112.157	7.45968	8.3795	6.17719	10.0114	cis
17513176	Tmem170	transmembrane protein 170	66817	chr8	-	111.865	111.877	UNC15494028	chr8	110.965	108.171	112.076	7.41595	8.05985	6.14111	9.63089	cis
17513194	Adat1	adenosine deaminase, tRNA-specific 1	30947	chr8	-	111.968	111.992	UNC15506442	chr8	112.064	107.96	112.247	7.35716	8.17818	6.17744	10.6707	cis
17513275	Gm16116	predicted gene 16116	102632568	chr8	-	114.591	114.595	UNC15538547	chr8	114.313	112.064	116.861	7.49684	8.39213	6.24751	7.84474	cis
17513297	Cdyl2	chromodomain protein, Y chromosome-like 2	75796	chr8	-	116.573	116.733	JAX00681454	chr8	116.481	115.653	117.459	7.39447	8.15209	6.17992	11.7887	cis
17513311	Cmc2	COX assembly mitochondrial protein 2	66531	chr8	-	116.889	116.921	UNC15555081	chr8	115.277	115.25	117.131	7.46307	8.36454	6.11431	12.0674	cis
17513479	Tldc1	TBC/LysM associated domain containing 1	74347	chr8	-	119.761	119.778	UNC15618980	chr8	119.474	119.021	120.609	7.60774	8.36646	6.19891	12.1618	cis
17513534	1190005I06Rik	RIKEN cDNA 1190005I06 gene	68918	chr8	-	120.609	120.634	UNC15638798	chr8	120.939	120.251	121.212	7.44853	8.29389	6.18113	12.0247	cis
17513560	Mthfsd	methenyltetrahydrofolate synthetase domain containing	234814	chr8	-	121.095	121.108	UNC15638330	chr8	120.909	119.821	121.189	7.46248	8.34837	6.16514	17.5543	cis
17513625	Klhdc4	kelch domain containing 4	234825	chr8	-	121.796	121.83	JAX00682343	chr8	121.468	121.148	122.258	7.37675	8.37367	6.22411	24.475	cis
17513655	Car5a	carbonic anhydrase 5a, mitochondrial	12352	chr8	-	121.916	121.945	UNC15654357	chr8	121.946	121.088	122.732	7.67414	8.65313	6.2191	9.36547	cis
17513771	Aprt	adenine phosphoribosyl transferase	11821	chr8	-	122.575	122.577	UNC15663129	chr8	122.536	122.41	122.799	7.44342	8.42274	6.1915	25.9535	cis
17513831	A530010L16Rik	RIKEN cDNA A530010L16 gene	382036	chr8	-	122.76	122.763	UNC15663129	chr8	122.536	122.201	125.167	7.52417	8.31612	6.25003	8.5851	cis
17513860	Sult5a1	sulfotransferase family 5A, member 1	57429	chr8	-	123.143	123.158	JAX00682838	chr8	123.223	121.719	123.683	7.42307	8.16899	6.21025	9.95051	cis
17513871	Chmp1a	charged multivesicular body protein 1A	234852	chr8	-	123.205	123.213	UNC15681657	chr8	123.947	123.114	124.457	7.3916	8.52619	6.19428	11.4063	cis
17513982	4732419C18Rik	RIKEN cDNA 4732419C18 gene	100042484	chr8	-	123.745	123.754	UNC15675864	chr8	123.463	122.754	123.775	7.56181	8.31752	6.2444	25.7341	cis
17514004	Nup133	nucleoporin 133	234865	chr8	-	123.897	123.949	UNC15682981	chr8	124.049	123.775	124.337	7.62942	8.51305	6.22188	20.7877	cis
17514033	Abcb10	ATP-binding cassette, sub-family B (MDR/TAP), member 10	56199	chr8	-	123.953	123.983	UNC15682981	chr8	124.049	122.471	124.6	7.55123	8.35647	6.26165	8.67426	cis
17514078	Agt	angiotensinogen (serpin peptidase inhibitor, clade A, member 8)	11606	chr8	-	124.557	124.57	UNC15693202	chr8	124.559	124.479	124.652	7.48503	8.66125	6.25806	35.8208	cis
17514087	2310022B05Rik	RIKEN cDNA 2310022B05 gene	69551	chr8	-	124.636	124.663	UNC15694768	chr8	124.652	122.754	126.286	7.45437	8.58467	6.19098	16.2519	cis
17514093	Ttc13	tetratricopeptide repeat domain 13	234875	chr8	-	124.671	124.722	UNC15691654	chr8	124.479	124.226	124.919	7.46913	8.6616	6.18392	22.1086	cis
17514118	Fam89a	family with sequence similarity 89, member A	69627	chr8	-	124.74	124.752	UNC15693202	chr8	124.559	124.42	125.96	7.40287	8.10746	6.14534	21.8771	cis
17514135	Egln1	egl-9 family hypoxia-inducible factor 1	112405	chr8	-	124.91	124.949	UNC15724143	chr8	126.555	122.536	127.927	7.38196	8.17472	6.21146	9.28397	cis
17514243	Irf2bp2	interferon regulatory factor 2 binding protein 2	270110	chr8	-	126.589	126.593	UNC15725017	chr8	126.643	126.051	128.196	7.51156	8.46333	6.19803	12.4953	cis
17514257	Rbm34	RNA binding motif protein 34	52202	chr8	-	126.947	126.971	UNC15730624	chr8	127.119	126.429	128.66	7.41979	8.34043	6.17195	8.44291	cis
17514320	2610044O15Rik8	RIKEN cDNA 2610044O15 gene	72139	chr8	-	129.217	129.234	UNC15747739	chr8	128.511	127.761	129.185	7.64223	8.44249	6.18728	16.8812	cis
17514417	Msantd4	Myb/SANT-like DNA-binding domain containing 4 with coiled-coils	78100	chr9	+	4.3836	4.38658	UNC15795926	chr9	6.96597	3.36987	7.75336	7.6856	8.43261	6.21949	10.5909	cis
17514460	Pdgfd	platelet-derived growth factor, D polypeptide	71785	chr9	+	6.16861	6.37871	JAX00684658	chr9	4.53789	3.36987	7.75336	7.63957	8.9771	6.23425	11.3223	cis
17514566	Mmp27	matrix metallopeptidase 27	234911	chr9	+	7.57142	7.58163	UNC15795926	chr9	6.96597	6.06626	7.75336	7.44104	8.17775	6.20344	38.9869	cis
17514603	Tmem123	transmembrane protein 123	71929	chr9	+	7.76408	7.79311	backupUNC090010803	chr9	8.8234	7.55012	9.07657	7.63948	8.51176	6.28073	39.7358	cis
17514732	Sesn3	sestrin 3	75747	chr9	+	14.2763	14.3258	UNC15867434	chr9	13.7419	8.90277	15.3093	7.34972	8.31889	6.19953	11.6636	cis
17514745	Cwc15	CWC15 spliceosome-associated protein	66070	chr9	+	14.5006	14.5105	JAX00686242	chr9	15.1728	13.8101	15.6963	7.46568	8.32917	6.22067	20.7227	cis
17242426	Pwp2	PWP2 periodic tryptophan protein homolog (yeast)	110816	chr10	-	78.1711	78.1851	JAX00293686	chr10	79.5269	76.6347	83.0581	7.37912	8.33201	6.21232	9.65519	cis
17242535	Syde1	synapse defective 1, Rho GTPase, homolog 1 (C. elegans)	71709	chr10	-	78.5846	78.5919	JAX00293686	chr10	79.5269	76.2415	79.7466	7.56817	8.25232	6.21082	9.49749	cis
17242570	2610008E11Rik	RIKEN cDNA 2610008E11 gene	72128	chr10	-	79.0645	79.0976	UNC18295082	chr10	79.6005	69.6329	86.2978	7.52298	8.31075	6.20825	9.44701	cis
17514832	Taf1d	TATA-box binding protein associated factor, RNA polymerase I, D	75316	chr9	+	15.3155	15.3156	JAX00686242	chr9	15.1728	14.7125	15.6103	7.40201	8.59256	6.17164	36.4953	cis
17514853	Slc36a4	solute carrier family 36 (proton/amino acid symporter), member 4	234967	chr9	+	15.7196	15.7415	JAX00686685	chr9	17.5544	15.6873	17.8391	7.55127	8.26271	6.21025	13.6644	cis
17514936	Zfp317	zinc finger protein 317	244713	chr9	+	19.6221	19.6486	UNC15977993	chr9	22.3105	17.9475	23.2982	7.59239	8.28391	6.25433	16.5719	cis
17514988	Zfp846	zinc finger protein 846	244721	chr9	+	20.5813	20.595	UNC090017673	chr9	18.3815	16.2652	22.9697	7.51751	8.45841	6.1982	9.86362	cis
17514998	Fbxl12os	F-box and leucine-rich repeat protein 12, opposite strand	66662	chr9	+	20.6075	20.6171	backupUNC090017527	chr9	17.8391	6.06626	24.9851	7.67768	8.60217	6.23015	8.78753	cis
17515019	Pin1	protein (peptidyl-prolyl cis/trans isomerase) NIMA-interacting 1	23988	chr9	+	20.6554	20.6659	UNC15936989	chr9	18.7646	16.3462	22.0453	7.47929	8.59294	6.22469	8.60518	cis
17515035	A230050P20Rik	RIKEN cDNA A230050P20 gene	319278	chr9	+	20.8687	20.874	UNC15924078	chr9	17.7309	15.7664	22.234	7.45573	8.44154	6.2485	12.0411	cis
17515045	Ppan	peter pan homolog	235036	chr9	+	20.8882	20.8922	UNC15968208	chr9	21.4973	17.8985	27.4015	7.63109	8.39404	6.19103	8.63205	cis
17515132	Atg4d	autophagy related 4D, cysteine peptidase	235040	chr9	+	21.2654	21.274	UNC15979030	chr9	22.3991	15.7664	27.3563	7.56176	8.29036	6.20262	8.32078	cis
17515413	Pigyl	phosphatidylinositol glycan anchor biosynthesis, class Y-like	66268	chr9	+	22.1569	22.1584	UNC15936989	chr9	18.7646	15.6873	22.3991	7.61758	8.60295	6.25142	8.6124	cis
17515420	Zfp872	zinc finger protein 872	619310	chr9	+	22.1971	22.2013	UNC15973814	chr9	22.0453	21.8455	22.3991	7.46417	8.62849	6.26305	67.7298	cis
17515539	Eepd1	endonuclease/exonuclease/phosphatase family domain containing 1	67484	chr9	+	25.4817	25.6038	UNC16023738	chr9	25.4711	22.3991	26.4086	7.54214	8.66985	6.18952	11.4516	cis
17515566	Thyn1	thymocyte nuclear protein 1	77862	chr9	+	26.9997	27.0073	JAX00688054	chr9	26.8618	26.714	26.9377	7.53742	8.67001	6.24457	38.8728	cis
17515577	Ncapd3	non-SMC condensin II complex, subunit D3	78658	chr9	+	27.0307	27.0949	backupUNC090026082	chr9	26.8964	26.1782	27.2263	7.47458	8.4204	6.21103	9.75383	cis
17515653	Opcml	opioid binding protein/cell adhesion molecule-like	330908	chr9	+	27.7908	28.9251	UNC16048790	chr9	27.8008	15.9993	28.5618	7.52093	8.70543	6.26349	11.0093	cis
17515687	Snx19	sorting nexin 19	102607	chr9	+	30.4273	30.4653	UNC16091560	chr9	30.8809	29.3195	33.4794	7.60998	8.51587	6.23835	11.0625	cis
17515758	Nfrkb	nuclear factor related to kappa B binding protein	235134	chr9	+	31.3889	31.4204	UNC16097569	chr9	31.3857	30.9126	32.4495	7.39832	8.14376	6.22429	11.8366	cis
17515871	4930581F22Rik	RIKEN cDNA 4930581F22 gene	78934	chr9	+	35.1167	35.1308	UNC16173871	chr9	37.3425	34.9557	41.0545	7.50183	8.20187	6.21992	11.2048	cis
17515921	Cdon	cell adhesion molecule-related/down-regulated by oncogenes	57810	chr9	+	35.4211	35.5048	UNC16129738	chr9	33.6867	32.8565	36.9862	7.53444	8.2158	6.25553	7.6608	cis
17516010	Fez1	fasciculation and elongation protein zeta 1 (zygin I)	235180	chr9	+	36.822	36.8789	UNC16167018	chr9	36.8581	34.4581	41.8981	7.50449	8.31328	6.20219	8.53635	cis
17516030	Tmem218	transmembrane protein 218	66279	chr9	+	37.2083	37.2231	UNC16173871	chr9	37.3425	36.9862	37.6329	7.38231	8.51189	6.16249	36.3647	cis
17516087	Vsig2	V-set and immunoglobulin domain containing 2	57276	chr9	+	37.5393	37.5442	UNC16198233	chr9	39.1272	16.2652	40.8006	7.40223	8.114	6.18255	8.38133	cis
17516098	Siae	sialic acid acetylesterase	22619	chr9	+	37.6139	37.6479	JAX00170209	chr9	38.3772	37.0117	39.6035	7.52266	8.23979	6.21424	23.8272	cis
17242842	Gamt	guanidinoacetate methyltransferase	14431	chr10	-	80.2582	80.261	UNC18297124	chr10	79.8886	79.7856	82.3472	7.50821	8.23178	6.19966	13.6009	cis
17242856	2310011J03Rik	RIKEN cDNA 2310011J03 gene	66374	chr10	-	80.3184	80.3205	JAX00196103	chr10	79.747	69.9942	83.0882	7.44226	8.36665	6.24859	7.7318	cis
17516332	Scn3b	sodium channel, voltage-gated, type III, beta	235281	chr9	+	40.2692	40.2914	UNC16207097	chr9	39.716	39.0359	41.2376	7.54387	8.57512	6.21346	14.6548	cis
17516352	Clmp	CXADR-like membrane protein	71566	chr9	+	40.686	40.7846	UNC16221361	chr9	40.8006	40.4037	41.7882	7.57784	8.23969	6.18256	13.5176	cis
17516365	Hspa8	heat shock protein 8	15481	chr9	+	40.8011	40.8051	UNC16225054	chr9	41.0545	34.8075	41.2978	7.54498	8.38105	6.26183	11.9881	cis
17516434	D630033O11Rik	RIKEN cDNA D630033O11 gene	235302	chr9	+	43.2599	43.2801	UNC16254154	chr9	43.0339	42.9263	47.2171	7.57388	8.41277	6.20102	8.39319	cis
17516450	Nectin1	nectin cell adhesion molecule 1	58235	chr9	+	43.7446	43.8073	UNC16253527	chr9	42.9471	42.6834	45.2048	7.58318	8.45793	6.23475	8.33646	cis
17516518	Mcam	melanoma cell adhesion molecule	84004	chr9	+	44.1347	44.1423	UNC16268588	chr9	44.1755	43.6908	45.1379	7.47605	8.65654	6.25704	13.5401	cis
17516666	Ift46	intraflagellar transport 46	76568	chr9	+	44.7718	44.7913	JAX00692332	chr9	44.6521	44.0328	45.0348	7.62268	8.38483	6.22363	27.0355	cis
17516707	Mpzl3	myelin protein zero-like 3	319742	chr9	+	45.0553	45.076	JAX00692443	chr9	45.0348	42.9471	45.2048	7.40339	8.3355	6.15855	10.8035	cis
17516752	BC049352	cDNA sequence BC049352	408059	chr9	+	45.1821	45.2497	UNC090316360	chr9	45.8106	42.9263	46.8926	7.57433	8.51438	6.26185	8.01164	cis
17516777	Fxyd6	FXYD domain-containing ion transport regulator 6	59095	chr9	+	45.3702	45.396	UNC16267135	chr9	44.0328	42.9858	46.6894	7.44184	8.5126	6.21873	9.05169	cis
17516871	Sik3	SIK family kinase 3	70661	chr9	+	46.0128	46.2236	UNC16291191	chr9	45.8663	45.2048	47.5547	7.42645	8.2264	6.23681	8.21098	cis
17516901	Apoa1	apolipoprotein A-I	11806	chr9	+	46.2286	46.2304	UNC16297225	chr9	46.4176	42.7425	47.8583	7.41986	8.1253	6.1633	7.72065	cis
17516908	Apoa4	apolipoprotein A-IV	11808	chr9	+	46.2407	46.2434	UNC16296639	chr9	46.3812	45.2048	47.1865	7.54531	8.69973	6.2329	14.8836	cis
17516921	Zpr1	ZPR1 zinc finger	22687	chr9	+	46.2731	46.2817	UNC16283742	chr9	45.375	45.2048	46.5666	7.41188	8.43986	6.20317	15.8053	cis
17516978	Nxpe4	neurexophilin and PC-esterase domain family, member 4	244853	chr9	+	48.3621	48.3995	UNC16334746	chr9	49.4287	48.9061	50.1992	7.60117	8.74153	6.16864	23.0954	cis
17516997	Gm5617	predicted gene 5617	434402	chr9	+	48.4953	48.496	UNC16329954	chr9	49.0288	48.3312	49.0624	7.54517	8.47867	6.18059	26.3348	cis
17517105	Il18	interleukin 18	16173	chr9	+	50.5654	50.5818	UNC16343835	chr9	50.2912	49.0288	51.5257	7.41299	8.25043	6.21921	9.67282	cis
17517132	Cryab	crystallin, alpha B	12955	chr9	+	50.7528	50.7566	UNC16350697	chr9	50.8623	50.2586	51.758	7.59034	8.4581	6.19437	20.8027	cis
17517151	Alg9	asparagine-linked glycosylation 9 (alpha 1,2 mannosyltransferase)	102580	chr9	+	50.7751	50.8434	UNC16354144	chr9	51.1956	50.3037	51.4871	7.43942	8.66743	6.18586	14.3362	cis
17517346	Gm16124	predicted gene 16124	102636154	chr9	+	53.6673	53.6813	UNC16398054	chr9	54.8799	51.758	55.0457	7.54951	8.67731	6.18877	19.0894	cis
17517349	Slc35f2	solute carrier family 35, member F2	72022	chr9	+	53.7716	53.8178	JAX00171258	chr9	52.4	50.3158	54.9652	7.5421	8.12849	6.19837	21.9367	cis
17517404	Dnaja4	DnaJ heat shock protein family (Hsp40) member A4	58233	chr9	+	54.6989	54.716	JAX00694570	chr9	53.9567	50.1226	58.5626	7.31123	7.93588	6.20009	8.96179	cis
17517500	Fbxo22	F-box protein 22	71999	chr9	+	55.209	55.2244	UNC16395832	chr9	54.6837	51.7887	55.2973	7.56288	8.56707	6.22398	14.4544	cis
17517512	Tmem266	transmembrane protein 266	244886	chr9	+	55.327	55.4383	UNC16434159	chr9	58.2835	53.7436	58.882	7.52729	8.64127	6.21719	7.60582	cis
17517544	Rcn2	reticulocalbin 2	26611	chr9	+	56.0419	56.0585	JAX00171535	chr9	56.0672	55.2031	56.4753	7.5489	8.54084	6.22085	20.0374	cis
17517608	Snupn	snurportin 1	66069	chr9	+	56.9509	56.9832	UNC16426342	chr9	57.4912	56.7452	59.4898	7.48088	8.45018	6.21531	8.28977	cis
17517733	Fam219b	family with sequence similarity 219, member B	78323	chr9	+	57.5375	57.5424	UNC090108723	chr9	56.8642	55.0457	57.6926	7.5883	8.55997	6.22213	8.92415	cis
17517799	Ubl7	ubiquitin-like 7 (bone marrow stromal cell-derived)	69459	chr9	+	57.911	57.9299	UNC16427662	chr9	57.6406	56.8134	58.1123	7.57641	8.48238	6.20675	19.3549	cis
17517934	Adpgk	ADP-dependent glucokinase	72141	chr9	+	59.2916	59.3184	JAX00695285	chr9	58.5282	58.1123	60.98	7.50988	8.36269	6.25391	18.3256	cis
17518109	Uaca	uveal autoantigen with coiled-coil domains and ankyrin repeats	72565	chr9	+	60.7946	60.8803	UNC16475910	chr9	61.5744	56.8134	61.6966	7.47854	8.64296	6.19564	17.2694	cis
17518172	Anp32a	acidic (leucine-rich) nuclear phosphoprotein 32 family, member A	11737	chr9	+	62.3413	62.3787	UNC16472361	chr9	61.2895	59.9465	63.6846	7.66526	8.51036	6.2581	9.4059	cis
17518256	Aagab	alpha- and gamma-adaptin binding protein	66939	chr9	+	63.6027	63.6415	UNC16473529	chr9	61.3882	61.2185	63.6246	7.5197	8.30511	6.0924	9.91254	cis
17518342	Megf11	multiple EGF-like-domains 11	214058	chr9	+	64.3857	64.7085	UNC16500353	chr9	63.6246	61.3391	64.7032	7.45945	8.45172	6.16033	13.8253	cis
17518378	Dennd4a	DENN/MADD domain containing 4A	102442	chr9	+	64.8115	64.9177	UNC16536403	chr9	66.7374	64.4923	71.6778	7.48469	8.23403	6.19462	7.90906	cis
17518417	Ints14	integrator complex subunit 14	69882	chr9	+	64.9608	64.9867	UNC16512360	chr9	64.4923	60.944	65.4591	7.5954	8.57971	6.19206	11.4875	cis
17518434	Dpp8	dipeptidylpeptidase 8	74388	chr9	+	65.0325	65.0821	UNC16515587	chr9	64.7741	64.6676	65.4591	7.34154	8.09606	6.18655	47.0641	cis
17243034	Mknk2	MAP kinase-interacting serine/threonine kinase 2	17347	chr10	-	80.6658	80.6759	JAX00019895	chr10	78.3761	77.4899	83.9985	7.41847	8.23334	6.19422	7.71603	cis
17243093	Plekhj1	pleckstrin homology domain containing, family J member 1	78670	chr10	-	80.7961	80.7985	UNC18296510	chr10	79.8132	77.9748	84.1528	7.51942	8.27458	6.21738	17.1512	cis
17243122	Timm13	translocase of inner mitochondrial membrane 13	30055	chr10	-	80.8995	80.901	UNC18296963	chr10	79.8658	75.8428	82.9644	7.46361	8.38396	6.26184	12.1266	cis
17518500	Parp16	poly (ADP-ribose) polymerase family, member 16	214424	chr9	+	65.2147	65.2384	UNC16515587	chr9	64.7741	64.5277	65.4591	7.54113	8.34815	6.16661	27.8264	cis
17518585	Spg21	SPG21, maspardin	27965	chr9	+	65.461	65.4879	UNC16523424	chr9	65.4591	64.6676	65.5925	7.49295	8.58819	6.22065	25.4905	cis
17518664	Ppib	peptidylprolyl isomerase B	19035	chr9	+	66.0602	66.0665	UNC16537896	chr9	66.8486	65.2778	67.7466	7.344	8.31253	6.14742	9.51606	cis
17518672	Fam96a	family with sequence similarity 96, member A	68250	chr9	+	66.1266	66.139	JAX00172249	chr9	65.5925	65.529	66.2819	7.33784	8.07952	6.17731	18.3318	cis
17518799	Rps27l	ribosomal protein S27-like	67941	chr9	+	66.9461	66.9495	backupUNC090126861	chr9	67.1017	66.7374	68.2395	7.49544	8.72011	6.21123	16.2368	cis
17518818	Vps13c	vacuolar protein sorting 13C	320528	chr9	+	67.8405	67.9955	UNC16552565	chr9	67.8971	66.201	68.7396	7.412	8.28053	6.17466	13.4283	cis
17518935	Ice2	interactor of little elongation complex ELL subunit 2	93697	chr9	+	69.3979	69.4326	UNC16563147	chr9	68.6845	67.1024	69.5776	7.51742	8.39436	6.23732	9.51714	cis
17518991	Bnip2	BCL2/adenovirus E1B interacting protein 2	12175	chr9	+	69.9895	70.0083	UNC16573846	chr9	69.4444	68.8874	70.1877	7.53545	8.40959	6.21645	12.0861	cis
17519022	Myo1e	myosin IE	71602	chr9	+	70.2075	70.3989	UNC16584631	chr9	70.1877	70.0804	73.5611	7.39476	8.4908	6.2026	9.39204	cis
17519238	Pygo1	pygopus 1	72135	chr9	+	72.9257	72.9493	UNC16603741	chr9	71.6778	71.4855	73.7423	7.44239	8.25257	6.1859	12.5763	cis
17519279	2310009A05Rik	RIKEN cDNA 2310009A05 gene	66364	chr9	+	73.0397	73.0428	UNC16626602	chr9	73.5224	70.761	74.1913	7.45966	8.23997	6.16909	8.14058	cis
17519282	Rab27a	RAB27A, member RAS oncogene family	11891	chr9	+	73.0449	73.097	UNC16616802	chr9	72.8355	71.8213	73.5611	7.29062	8.04897	6.17488	24.8142	cis
17519316	Wdr72	WD repeat domain 72	546144	chr9	+	74.1346	74.2832	UNC090145124	chr9	74.577	73.2279	76.0142	7.84326	8.96125	6.32771	40.45	cis
17519509	Leo1	Leo1, Paf1/RNA polymerase II complex component	235497	chr9	+	75.4415	75.4664	UNC16659342	chr9	75.961	73.7174	77.1817	7.46134	8.23501	6.18508	10.5451	cis
17519533	Lysmd2	LysM, putative peptidoglycan-binding, domain containing 2	70082	chr9	+	75.6258	75.6376	UNC16663093	chr9	76.265	74.7095	78.5943	7.38229	8.28282	6.16757	12.9955	cis
17519538	Bmp5	bone morphogenetic protein 5	12160	chr9	+	75.7756	75.8999	UNC16626137	chr9	73.489	69.472	84.6915	7.67989	8.70332	6.23856	7.90399	cis
17519619	Ick	intestinal cell kinase	56542	chr9	+	78.1092	78.1705	JAX00699253	chr9	78.2102	77.7294	78.9667	7.57447	8.51123	6.17678	23.8669	cis
17519644	C920006O11Rik	RIKEN cDNA C920006O11 gene	320295	chr9	+	78.176	78.1788	UNC16684648	chr9	77.8486	77.7294	78.3342	7.48002	8.18472	6.16808	49.7511	cis
17519649	Gsta4	glutathione S-transferase, alpha 4	14860	chr9	+	78.192	78.2093	UNC16684648	chr9	77.8486	77.0987	79.4339	7.68822	8.70062	6.22424	12.4728	cis
17519718	Mto1	mitochondrial tRNA translation optimization 1	68291	chr9	+	78.4482	78.4748	UNC16695482	chr9	78.6433	77.7294	79.3558	7.53837	8.40134	6.20004	23.3367	cis
17519821	Myo6	myosin VI	17920	chr9	+	80.2177	80.3099	UNC16722368	chr9	80.602	80.0031	81.3877	7.46788	8.43788	6.24416	15.954	cis
17519888	Irak1bp1	interleukin-1 receptor-associated kinase 1 binding protein 1	65099	chr9	+	82.8298	82.8474	UNC16758798	chr9	83.044	82.6397	83.1719	7.37841	8.3383	6.21041	25.3645	cis
17519898	Sh3bgrl2	SH3 domain binding glutamic acid-rich protein like 2	212531	chr9	+	83.5484	83.6381	UNC16764900	chr9	83.5266	74.6586	85.9856	7.45349	8.6221	6.23434	9.30081	cis
17519940	Bckdhb	branched chain ketoacid dehydrogenase E1, beta polypeptide	12040	chr9	+	83.9253	84.1242	UNC16785551	chr9	85.1703	83.8217	86.8315	7.40922	8.74544	6.19084	36.9811	cis
17519972	Dopey1	dopey family member 1	320615	chr9	+	86.4672	86.5548	UNC16813513	chr9	87.0336	85.9162	88.7288	7.60625	8.41026	6.24819	8.59543	cis
17520043	Cyb5r4	cytochrome b5 reductase 4	266690	chr9	+	87.0271	87.0776	UNC16810017	chr9	86.749	85.9906	92.2441	7.52719	8.24837	6.16921	21.1547	cis
17520063	Mrap2	melanocortin 2 receptor accessory protein 2	244958	chr9	+	87.1443	87.1839	JAX00700939	chr9	86.8687	86.8163	90.0236	7.95427	8.88087	6.35156	8.99057	cis
17520073	Nt5e	5' nucleotidase, ecto	23959	chr9	+	88.3277	88.3716	UNC090481644	chr9	87.3265	85.2545	95.1393	7.58669	8.46224	6.27063	11.5405	cis
17520085	Zfp949	zinc finger protein 949	71640	chr9	+	88.548	88.5706	UNC091069796	chr9	88.7288	88.3643	89.2261	7.53756	8.55906	6.15497	62.7849	cis
17520116	Gm10634	predicted gene 10634	100039674	chr9	+	88.7202	88.8308	UNC16832742	chr9	88.4968	86.8315	95.617	7.74673	8.74461	6.30712	9.8034	cis
17520233	Ctsh	cathepsin H	13036	chr9	+	90.0543	90.076	UNC16844386	chr9	90.0631	89.648	92.8212	7.42363	8.52737	6.15763	44.4499	cis
17520326	Plscr2	phospholipid scramblase 2	18828	chr9	+	92.2759	92.2977	JAX00237809	chr9	92.2441	87.3122	95.3232	7.57599	8.34288	6.27084	9.07852	cis
17520353	Plscr4	phospholipid scramblase 4	235527	chr9	+	92.4574	92.4933	JAX00701731	chr9	92.3388	86.8315	95.1769	7.46129	8.16018	6.24159	8.61018	cis
17520364	Plod2	procollagen lysine, 2-oxoglutarate 5-dioxygenase 2	26432	chr9	+	92.5424	92.608	UNC16877930	chr9	92.7667	86.8163	95.3686	7.56214	8.57677	6.16859	12.2232	cis
17520396	Slc9a9	solute carrier family 9 (sodium/hydrogen exchanger), member 9	331004	chr9	+	94.6699	95.2297	backupUNC090188167	chr9	94.6944	86.8315	95.0047	7.64525	8.37229	6.19745	22.2696	cis
17520425	Pcolce2	procollagen C-endopeptidase enhancer 2	76477	chr9	+	95.6377	95.6962	UNC16915206	chr9	95.3132	88.2303	97.2096	7.48002	8.55045	6.22064	8.56511	cis
17520439	Atr	ataxia telangiectasia and Rad3 related	245000	chr9	+	95.8628	95.9516	UNC16922002	chr9	95.753	89.5288	96.6071	7.49523	8.32667	6.24307	16.8298	cis
17520611	Nmnat3	nicotinamide nucleotide adenylyltransferase 3	74080	chr9	+	98.2874	98.4203	JAX00702894	chr9	97.6696	96.9495	98.6873	7.67952	8.49638	6.24436	21.09	cis
17520624	Rbp1	retinol binding protein 1, cellular	19659	chr9	+	98.423	98.4465	UNC16940356	chr9	97.1252	95.7773	98.9448	7.59949	8.65532	6.21554	11.4617	cis
17520687	Cep70	centrosomal protein 70	68121	chr9	+	99.2463	99.3002	UNC16966506	chr9	99.0761	98.9764	99.7286	7.50008	8.09871	6.2348	36.9471	cis
17520736	A4gnt	alpha-1,4-N-acetylglucosaminyltransferase	333424	chr9	+	99.6125	99.6221	JAX00703252	chr9	99.4811	99.2913	99.8229	7.53668	8.42957	6.22611	55.3756	cis
17520742	Dzip1l	DAZ interacting protein 1-like	72507	chr9	+	99.6296	99.6687	JAX00703252	chr9	99.4811	99.2913	99.8229	7.49039	8.35265	6.15008	44.0266	cis
17520851	Anapc13	anaphase promoting complex subunit 13	69010	chr9	+	102.63	102.634	UNC17001774	chr9	101.61	101.379	102.537	7.40564	8.34282	6.18645	27.1138	cis
17520881	Gm5627	predicted gene 5627	434510	chr9	+	102.74	102.757	UNC17018106	chr9	103.009	100.052	103.679	7.46605	8.39565	6.20236	15.3651	cis
17520886	Ryk	receptor-like tyrosine kinase	20187	chr9	+	102.835	102.908	UNC17016186	chr9	102.88	101.174	103.638	7.44726	8.23883	6.17091	10.7016	cis
17520905	Slco2a1	solute carrier organic anion transporter family, member 2a1	24059	chr9	+	103.009	103.088	UNC17029555	chr9	103.679	103.62	103.787	7.32867	8.27437	6.19662	26.4818	cis
17521014	Acad11	acyl-Coenzyme A dehydrogenase family, member 11	102632	chr9	+	104.063	104.127	UNC17031387	chr9	103.789	103.691	106.564	7.51942	8.34477	6.20183	16.7803	cis
17521070	Mrpl3	mitochondrial ribosomal protein L3	94062	chr9	+	105.053	105.077	UNC17050181	chr9	104.919	104.041	106.672	7.31106	8.24123	6.21433	13.8493	cis
17521105	Pik3r4	phosphoinositide-3-kinase regulatory subunit 4	75669	chr9	+	105.643	105.688	UNC17072549	chr9	106.185	104.919	106.721	7.43657	8.17426	6.19457	15.2638	cis
17521141	Mir135a-1	microRNA 135a-1	387153	chr9	+	106.154	106.154	UNC17062023	chr9	105.602	103.735	106.721	7.63596	8.56698	6.26516	8.77195	cis
17521143	Wdr82	WD repeat domain containing 82	77305	chr9	+	106.171	106.192	UNC17061374	chr9	105.554	103.789	107.681	7.61522	8.37573	6.24782	7.98258	cis
17521194	Dusp7	dual specificity phosphatase 7	235584	chr9	+	106.369	106.376	UNC17072549	chr9	106.185	105.794	106.672	7.56189	8.48456	6.19805	19.9975	cis
17521204	Rpl29	ribosomal protein L29	19944	chr9	+	106.429	106.43	UNC17072549	chr9	106.185	105.794	106.564	7.1385	7.87818	6.16843	73.2286	cis
17521211	Abhd14b	abhydrolase domain containing 14b	76491	chr9	+	106.449	106.453	JAX00704605	chr9	106.061	105.794	106.606	7.59742	8.46594	6.2213	34.3131	cis
17521218	Pcbp4	poly(rC) binding protein 4	59092	chr9	+	106.454	106.464	UNC17088221	chr9	107.681	105.163	108.974	7.39796	8.33014	6.17326	10.481	cis
17521264	Dcaf1	DDB1 and CUL4 associated factor 1	321006	chr9	+	106.822	106.883	UNC17057349	chr9	105.307	104.919	107.607	7.43092	8.20214	6.20152	11.824	cis
17521314	6430571L13Rik	RIKEN cDNA 6430571L13 gene	235599	chr9	+	107.341	107.352	UNC17077906	chr9	106.606	105.513	108.226	7.40076	8.18549	6.22257	10.4907	cis
17521371	Tmem115	transmembrane protein 115	56395	chr9	+	107.534	107.539	UNC17053033	chr9	105.069	103.735	106.606	7.46805	8.35495	6.22718	9.03861	cis
17521376	Nprl2	nitrogen permease regulator-like 2	56032	chr9	+	107.542	107.546	UNC17077906	chr9	106.606	103.638	108.322	7.4596	8.52441	6.25074	8.80719	cis
17521390	Zmynd10	zinc finger, MYND domain containing 10	114602	chr9	+	107.547	107.551	UNC17080330	chr9	106.866	106.483	107.699	7.57213	8.18482	6.16373	16.2141	cis
17521428	Hyal1	hyaluronoglucosaminidase 1	15586	chr9	+	107.577	107.582	UNC17079189	chr9	106.721	105.513	107.699	7.48101	8.40802	6.2376	8.254	cis
17521441	Nat6	N-acetyltransferase 6	56441	chr9	+	107.583	107.584	JAX00175387	chr9	107.576	103.638	107.681	7.56249	8.81795	6.27127	8.48198	cis
17521454	Ifrd2	interferon-related developmental regulator 2	15983	chr9	+	107.588	107.593	JAX00175387	chr9	107.576	106.483	107.607	7.62165	8.51651	6.25804	30.7097	cis
17521475	Mon1a	MON1 homolog A, secretory traffciking associated	72825	chr9	+	107.888	107.903	UNC17092085	chr9	108.144	107.66	108.261	7.49269	8.15575	6.18625	34.8518	cis
17521625	Mst1	macrophage stimulating 1 (hepatocyte growth factor-like)	15235	chr9	+	108.08	108.085	UNC17091640	chr9	108.092	107.583	108.322	7.4394	8.06724	6.18004	19.9765	cis
17521652	Nicn1	nicolin 1	66257	chr9	+	108.29	108.296	UNC17094368	chr9	108.366	108.261	108.974	7.42703	8.36609	6.23887	18.9975	cis
17521673	Rhoa	ras homolog family member A	11848	chr9	+	108.306	108.338	UNC090368888	chr9	108.974	108.226	110.66	7.49689	8.19827	6.17357	12.4191	cis
17521686	Usp4	ubiquitin specific peptidase 4 (proto-oncogene)	22258	chr9	+	108.348	108.392	JAX00175418	chr9	107.987	105.695	109.091	7.34331	8.29279	6.19044	11.4493	cis
17521858	Dalrd3	DALR anticodon binding domain containing 3	67789	chr9	+	108.57	108.573	UNC17094019	chr9	108.322	108.144	109.046	7.3955	8.13189	6.19946	13.5078	cis
17521887	Prkar2a	protein kinase, cAMP dependent regulatory, type II alpha	19087	chr9	+	108.692	108.747	JAX00705053	chr9	108.945	106.564	109.453	7.47279	8.35645	6.21906	11.7682	cis
17521996	Uqcrc1	ubiquinol-cytochrome c reductase core protein 1	22273	chr9	+	108.937	108.95	UNC17097513	chr9	108.698	108.559	108.974	7.52429	8.31986	6.18128	44.9581	cis
17522167	Plxnb1	plexin B1	235611	chr9	+	109.096	109.118	UNC17102072	chr9	109.237	108.974	110.753	7.48323	8.034	6.15931	12.3534	cis
17522219	Nme6	NME/NM23 nucleoside diphosphate kinase 6	54369	chr9	+	109.833	109.843	UNC17104240	chr9	109.631	108.974	110.66	7.39141	8.02049	6.15516	37.4832	cis
17522284	Smarcc1	SWI/SNF related, matrix associated, actin dependent regulator of chromatin, subfamily c, member 1	20588	chr9	+	110.132	110.24	UNC17115998	chr9	110.753	108.226	111.017	7.5054	8.33548	6.14661	12.2159	cis
17522577	Lrrfip2	leucine rich repeat (in FLII) interacting protein 2	71268	chr9	+	111.118	111.224	JAX00705387	chr9	110.97	109.267	111.699	7.5136	8.33823	6.18928	16.2911	cis
17522626	Dclk3	doublecortin-like kinase 3	245038	chr9	+	111.439	111.489	UNC17127344	chr9	111.515	111.436	111.563	7.67034	8.59221	6.23043	39.3835	cis
17522651	Clasp2	CLIP associating protein 2	76499	chr9	+	113.742	113.919	UNC17183072	chr9	115.1	113.36	117.255	7.47535	8.12894	6.19661	7.67706	cis
17522698	Ubp1	upstream binding protein 1	22221	chr9	+	113.931	113.977	UNC17176230	chr9	114.768	103.62	115.585	7.5803	8.41804	6.21239	7.83628	cis
17522729	4930520O04Rik	RIKEN cDNA 4930520O04 gene	75116	chr9	+	114.368	114.377	JAX00175914	chr9	114.681	113.36	114.811	7.48267	8.5137	6.15519	18.4902	cis
17522736	Tmppe	transmembrane protein with metallophosphoesterase domain	100504715	chr9	+	114.401	114.474	UNC17171938	chr9	114.474	114.39	114.768	7.48101	8.31323	6.1981	31.3014	cis
17522761	Dync1li1	dynein cytoplasmic 1 light intermediate chain 1	235661	chr9	+	114.689	114.724	JAX00175914	chr9	114.681	111.735	115.102	7.52685	8.36941	6.23552	7.80554	cis
17522916	Itga9	integrin alpha 9	104099	chr9	+	118.607	118.9	UNC17237259	chr9	118.585	115.992	118.865	7.45309	8.1558	6.20297	9.50758	cis
17522958	Ctdspl	CTD (carboxy-terminal domain, RNA polymerase II, polypeptide A) small phosphatase-like	69274	chr9	+	118.93	119.043	UNC17242238	chr9	118.863	118.767	120.098	7.39631	8.31284	6.19583	16.0375	cis
17523042	Acaa1a	acetyl-Coenzyme A acyltransferase 1A	113868	chr9	+	119.341	119.35	UNC17248287	chr9	119.36	118.315	120.098	7.56701	8.85166	6.23585	17.4928	cis
17523177	Rpsa	ribosomal protein SA	16785	chr9	+	120.132	120.132	UNC17263428	chr9	120.395	118.898	121.297	7.50188	8.29024	6.23099	10.7466	cis
17523190	Snora62	small nucleolar RNA, H/ACA box 62	104433	chr9	+	120.13	120.131	UNC17242183	chr9	118.861	116.519	121.08	7.37037	8.12793	6.22022	9.79796	cis
17523224	Eif1b	eukaryotic translation initiation factor 1B	68969	chr9	+	120.493	120.495	UNC17269725	chr9	120.794	117.376	121.297	7.51485	8.39669	6.15568	9.01153	cis
17523251	5830454E08Rik	RIKEN cDNA 5830454E08 gene	76100	chr9	+	120.577	120.578	JAX00708257	chr9	122.724	121.778	122.957	7.4442	8.10638	6.16704	9.33183	cis
17523257	Gm38502	predicted gene, 38502	102637827	chr9	+	120.929	120.96	UNC_rs33696838	chr9	121.297	118.898	122.947	7.50371	8.45871	6.22799	8.62794	cis
17523326	Ss18l2	SS18, nBAF chromatin remodeling complex subunit like 2	26901	chr9	+	121.71	121.713	JAX00708083	chr9	121.778	121.671	121.9	7.55253	8.50215	6.20768	12.4154	cis
17523371	Ackr2	atypical chemokine receptor 2	59289	chr9	+	121.898	121.911	UNC17287038	chr9	122.013	121.778	122.761	7.45408	8.32837	6.17641	10.0771	cis
17523380	1700048O20Rik	RIKEN cDNA 1700048O20 gene	69430	chr9	+	121.937	121.946	UNC17286512	chr9	121.974	121.842	122.692	7.38969	8.44099	6.20136	16.6141	cis
17523387	Fam198a	family with sequence similarity 198, member A	245050	chr9	+	121.951	121.98	UNC17296088	chr9	122.692	121.778	122.872	7.62304	8.31979	6.19705	8.24987	cis
17523398	Snrk	SNF related kinase	20623	chr9	+	122.117	122.168	UNC17299751	chr9	123.06	122.928	123.703	7.53813	8.37635	6.22937	9.75261	cis
17243450	Gm3055	predicted gene 3055	100040944	chr10	-	81.771	81.7712	UNC100214691	chr10	81.5097	78.4678	85.6259	7.42918	8.55611	6.22013	13.1718	cis
17243460	Zfp781	zinc finger protein 781	331188	chr10	-	81.9021	81.911	UNC18320095	chr10	82.9644	79.8658	84.1528	7.5407	8.53579	6.19804	25.1331	cis
17243469	Zfp938	zinc finger protein 938	237411	chr10	-	82.2249	82.2412	UNC100214691	chr10	81.5097	80.84	82.3797	7.48076	8.09222	6.15383	17.3428	cis
17243509	Nfyb	nuclear transcription factor-Y beta	18045	chr10	-	82.7497	82.7641	UNC18302372	chr10	80.7195	79.5306	83.0581	7.51012	8.20072	6.21825	27.2204	cis
17243525	Slc41a2	solute carrier family 41, member 2	338365	chr10	-	83.2309	83.3379	UNC18335147	chr10	84.1629	77.897	85.102	7.51627	8.04839	6.22429	9.27182	cis
17523531	Tmem42	transmembrane protein 42	66079	chr9	+	123.021	123.023	UNC17298567	chr9	122.957	122.933	123.506	7.43647	8.48822	6.22522	19.7819	cis
17523555	Exosc7	exosome component 7	66446	chr9	+	123.113	123.136	backupUNC090257190	chr9	123.204	123.042	123.506	7.49007	8.3766	6.20219	35.9133	cis
17523574	Lars2	leucyl-tRNA synthetase, mitochondrial	102436	chr9	+	123.367	123.462	UNC17299859	chr9	123.069	122.95	123.506	7.53955	8.2874	6.20079	30.2326	cis
17523646	Ccr3	chemokine (C-C motif) receptor 3	12771	chr9	+	124.022	124.031	UNC17311831	chr9	124.057	123.952	124.153	7.48728	8.38196	6.22332	15.7248	cis
17523861	Birc2	baculoviral IAP repeat-containing 2	11797	chr9	-	7.8367	7.83706	UNC15834149	chr9	10.2462	4.37413	13.1268	7.60432	8.30776	6.22793	10.4558	cis
17523863	Birc3	baculoviral IAP repeat-containing 3	11796	chr9	-	7.84891	7.87315	backupUNC090009650	chr9	8.11589	3.36987	10.495	7.56981	8.36687	6.19468	11.1825	cis
17523898	9230110C19Rik	RIKEN cDNA 9230110C19 gene	234912	chr9	-	8.02222	8.04282	UNC15803388	chr9	7.75336	6.29874	9.07657	7.35676	8.08473	6.2062	23.6883	cis
17523994	Cep57	centrosomal protein 57	74360	chr9	-	13.8084	13.8271	UNC15870038	chr9	14.0158	13.6621	15.6963	7.52805	8.36445	6.17401	24.8398	cis
17524014	Endod1	endonuclease domain containing 1	71946	chr9	-	14.355	14.3815	UNC15892603	chr9	15.6873	13.4601	29.5102	7.42891	8.89634	6.20527	8.46406	cis
17524141	Med17	mediator complex subunit 17	234959	chr9	-	15.2607	15.2799	backupUNC091408323	chr9	15.5722	14.5505	15.8849	7.52897	8.323	6.20033	15.4713	cis
17524170	Cep295	centrosomal protein 295	319675	chr9	-	15.3174	15.3578	UNC15898646	chr9	16.061	11.1846	21.2278	7.52831	8.15066	6.17135	9.9368	cis
17524211	Deup1	deuterosome assembly protein 1	234964	chr9	-	15.56	15.6279	JAX00686257	chr9	15.3093	13.1358	27.4015	7.47791	8.5755	6.26348	7.56548	cis
17524233	Fat3	FAT atypical cadherin 3	270120	chr9	-	15.9142	16.3756	UNC15901256	chr9	16.2202	15.8187	17.2761	7.57945	8.44847	6.24505	28.4229	cis
17524264	Naalad2	N-acetylated alpha-linked acidic dipeptidase 2	72560	chr9	-	18.3221	18.4029	UNC15927356	chr9	17.9475	16.2202	23.5435	7.5933	8.61211	6.21999	9.01578	cis
17524296	Zfp558	zinc finger protein 558	72230	chr9	-	18.4546	18.4783	UNC090638995	chr9	18.7101	15.8187	21.4973	7.4194	8.21986	6.16651	11.4643	cis
17524411	Zfp266	zinc finger protein 266	77519	chr9	-	20.4963	20.5214	UNC15933598	chr9	18.4764	15.8187	23.5435	7.36596	8.10794	6.22107	11.9011	cis
17524426	Fbxl12	F-box and leucine-rich repeat protein 12	30843	chr9	-	20.6182	20.6448	UNC090017673	chr9	18.3815	16.2202	25.0005	7.44002	8.26701	6.18258	8.07085	cis
17524451	Col5a3	collagen, type V, alpha 3	53867	chr9	-	20.7702	20.815	UNC15934761	chr9	18.5993	17.1545	23.2006	7.46399	8.51443	6.21759	21.9815	cis
17524523	Eif3g	eukaryotic translation initiation factor 3, subunit G	53356	chr9	-	20.8944	20.8984	UNC090646410	chr9	19.7799	17.9475	21.4973	7.56657	8.5946	6.16731	33.1025	cis
17524671	S1pr5	sphingosine-1-phosphate receptor 5	94226	chr9	-	21.2431	21.2484	UNC15968208	chr9	21.4973	18.8424	23.3399	7.43231	8.22569	6.1874	30.2176	cis
17524731	Yipf2	Yip1 domain family, member 2	74766	chr9	-	21.589	21.5928	UNC15924078	chr9	17.7309	16.2652	28.6592	7.38852	8.21804	6.21886	13.8805	cis
17524752	Spc24	SPC24, NDC80 kinetochore complex component, homolog (S. cerevisiae)	67629	chr9	-	21.7558	21.7602	UNC15968208	chr9	21.4973	18.8424	23.1381	7.43341	8.47936	6.1847	24.1898	cis
17524760	Kank2	KN motif and ankyrin repeat domains 2	235041	chr9	-	21.768	21.7962	UNC15976587	chr9	22.2346	14.4578	26.4338	7.40297	8.38149	6.20786	8.52093	cis
17524827	Rab3d	RAB3D, member RAS oncogene family	19340	chr9	-	21.9076	21.9182	UNC16025126	chr9	25.5706	17.9475	27.3563	7.5801	8.39267	6.22977	11.8193	cis
17524838	Tmem205	transmembrane protein 205	235043	chr9	-	21.921	21.9275	UNC15968951	chr9	21.6004	17.9475	23.7067	7.44917	8.3017	6.12953	10.5093	cis
17524858	Rgl3	ral guanine nucleotide dissociation stimulator-like 3	71746	chr9	-	21.9716	21.9889	UNC15974661	chr9	22.1106	17.9475	23.7067	7.57099	8.78241	6.22248	9.68655	cis
17524914	Ecsit	ECSIT signalling integrator	26940	chr9	-	22.0723	22.0854	JAX00687219	chr9	21.7834	18.8424	22.3991	7.39419	8.06356	6.25199	26.3283	cis
17524930	Acp5	acid phosphatase 5, tartrate resistant	11433	chr9	-	22.1268	22.1357	UNC15974661	chr9	22.1106	16.2652	25.2509	7.49706	8.61502	6.20964	11.7817	cis
17524939	1810064F22Rik	RIKEN cDNA 1810064F22 gene	69862	chr9	-	22.2072	22.2138	UNC15942710	chr9	19.176	17.9475	22.3991	7.49586	8.26599	6.20083	29.585	cis
17524944	Zfp599	zinc finger protein 599	235048	chr9	-	22.2486	22.2599	UNC15974661	chr9	22.1106	21.2278	22.8541	7.50749	8.1406	6.15744	27.8287	cis
17524958	Zfp810	zinc finger protein 810	235050	chr9	-	22.2769	22.3076	JAX00687232	chr9	21.8713	17.9475	27.0362	7.51276	8.52024	6.17421	20.9345	cis
17524969	Anln	anillin, actin binding protein	68743	chr9	-	22.3319	22.3892	UNC15981731	chr9	22.5736	18.8424	27.8608	7.55768	8.39663	6.25697	8.05212	cis
17524994	Rp9	retinitis pigmentosa 9 (human)	55934	chr9	-	22.4116	22.4683	UNC15979030	chr9	22.3991	22.1106	23.372	7.61457	8.26131	6.1903	36.0956	cis
17525007	Dpy19l1	dpy-19-like 1 (C. elegans)	244745	chr9	-	24.4137	24.496	JAX00687984	chr9	26.1464	23.6361	26.4086	7.40857	8.3738	6.17711	23.4439	cis
17525163	Acad8	acyl-Coenzyme A dehydrogenase family, member 8	66948	chr9	-	26.9748	26.9995	UNC16048790	chr9	27.8008	21.2278	28.0488	7.43354	8.43582	6.19905	19.0076	cis
17525263	Aplp2	amyloid beta (A4) precursor-like protein 2	11804	chr9	-	31.1496	31.2117	JAX00688908	chr9	30.4975	30.3047	31.9898	7.53987	8.4071	6.15433	16.3361	cis
17525288	Tmem45b	transmembrane protein 45b	235135	chr9	-	31.4264	31.4642	UNC16101806	chr9	31.7151	29.9449	32.9628	7.35056	8.38338	6.22225	20.303	cis
17525329	St3gal4	ST3 beta-galactoside alpha-2,3-sialyltransferase 4	20443	chr9	-	35.0467	35.1168	JAX00170209	chr9	38.3772	34.9063	40.4105	7.49016	8.43257	6.21963	11.4398	cis
17525353	Tirap	toll-interleukin 1 receptor (TIR) domain-containing adaptor protein	117149	chr9	-	35.1887	35.2003	UNC16152834	chr9	35.3751	34.9939	37.4684	7.34346	7.99579	6.19476	19.8271	cis
17525363	Foxred1	FAD-dependent oxidoreductase domain containing 1	235169	chr9	-	35.2048	35.211	UNC16145604	chr9	34.83	33.4938	40.3299	7.50842	8.30025	6.1869	10.1274	cis
17525548	Ei24	etoposide induced 2.4 mRNA	13663	chr9	-	36.7794	36.7933	UNC16151701	chr9	35.2897	34.5458	40.2253	7.54105	8.33023	6.2109	11.0817	cis
17525578	Slc37a2	solute carrier family 37 (glycerol-3-phosphate transporter), member 2	56857	chr9	-	37.2293	37.2555	JAX00690435	chr9	36.9862	34.7154	39.9598	7.53203	8.38387	6.1899	8.31873	cis
17525599	Ccdc15	coiled-coil domain containing 15	245902	chr9	-	37.2761	37.3483	UNC16147400	chr9	34.9408	33.4347	37.5695	7.49626	8.39365	6.18644	13.0697	cis
17525653	Spa17	sperm autoantigenic protein 17	20686	chr9	-	37.6034	37.6137	JAX00170209	chr9	38.3772	37.0117	39.1272	7.48994	8.20314	6.22156	22.522	cis
17243576	Appl2	adaptor protein, phosphotyrosine interaction, PH domain and leucine zipper containing 2	216190	chr10	-	83.6006	83.6487	UNC18331758	chr10	83.9556	79.8886	84.6423	7.43847	8.31362	6.17631	11.0859	cis
17243638	Mterf2	mitochondrial transcription termination factor 2	74238	chr10	-	85.1194	85.128	UNC100292715	chr10	84.6423	83.0472	85.9927	7.67242	8.57885	6.25665	8.4605	cis
17243661	Prdm4	PR domain containing 4	72843	chr10	-	85.8924	85.9171	UNC18356716	chr10	85.7522	85.5922	86.2195	7.71209	8.37326	6.22075	9.87487	cis
17243717	Syn3	synapsin III	27204	chr10	-	86.0512	86.4989	UNC18364309	chr10	86.467	84.0138	87.8816	7.45842	8.44992	6.16819	15.8317	cis
17243763	Stab2	stabilin 2	192188	chr10	-	86.8413	87.0079	UNC18367157	chr10	86.8054	85.672	87.6537	7.49431	8.19001	6.19276	21.7383	cis
17525894	Sorl1	sortilin-related receptor, LDLR class A repeats-containing	20660	chr9	-	41.9675	42.1239	UNC16241644	chr9	42.1409	41.8485	42.4206	7.44984	8.48724	6.15949	24.574	cis
17525955	Sc5d	sterol-C5-desaturase	235293	chr9	-	42.2548	42.2643	UNC16243882	chr9	42.2623	42.1276	42.3872	7.48783	8.54505	6.23177	20.6552	cis
17525993	Tbcel	tubulin folding cofactor E-like	272589	chr9	-	42.4128	42.5078	UNC16247134	chr9	42.5354	42.3872	42.5461	7.52585	8.46485	6.19139	21.4827	cis
17526081	Tmem136	transmembrane protein 136	235300	chr9	-	43.1091	43.1166	JAX00170674	chr9	44.6126	42.8874	45.1678	7.54568	8.17562	6.2047	11.2348	cis
17526265	Trappc4	trafficking protein particle complex 4	60409	chr9	-	44.4039	44.4075	UNC16264077	chr9	43.841	42.4126	46.4921	7.52035	8.63316	6.24844	7.913	cis
17526377	Ttc36	tetratricopeptide repeat domain 36	192653	chr9	-	44.7995	44.8029	UNC090315219	chr9	44.8734	42.6709	45.2637	7.37331	8.30707	6.19071	7.64362	cis
17526479	Tmprss4	transmembrane protease, serine 4	214523	chr9	-	45.1731	45.2041	UNC16262454	chr9	43.6908	42.9263	46.5224	7.55129	8.58111	6.21858	15.0926	cis
17526514	Cep164	centrosomal protein 164	214552	chr9	-	45.7682	45.8287	UNC16282766	chr9	45.3247	44.9849	46.9324	7.51276	8.32808	6.2208	10.4572	cis
17526550	Rnf214	ring finger protein 214	235315	chr9	-	45.8569	45.8584	UNC16301629	chr9	46.7144	45.0646	47.1149	7.49851	8.45156	6.19252	9.33591	cis
17526583	Sidt2	SID1 transmembrane family, member 2	214597	chr9	-	45.9392	45.955	UNC16296006	chr9	46.3349	45.2637	46.5666	7.38731	8.13822	6.16912	29.7051	cis
17526663	Nxpe2	neurexophilin and PC-esterase domain family, member 2	78252	chr9	-	48.3185	48.3534	UNC16327788	chr9	48.8406	47.8583	49.1782	7.51671	8.38456	6.22617	18.3177	cis
17526674	Rexo2	RNA exonuclease 2	104444	chr9	-	48.4686	48.4806	UNC090092207	chr9	48.8	47.5196	50.2952	7.47983	8.16689	6.22906	8.91217	cis
17526695	Nnmt	nicotinamide N-methyltransferase	18113	chr9	-	48.5919	48.6052	UNC16329954	chr9	49.0288	47.5196	49.0624	7.47201	8.35703	6.19727	8.81872	cis
17526813	Pts	6-pyruvoyl-tetrahydropterin synthase	19286	chr9	-	50.5219	50.5286	UNC16346613	chr9	50.5482	50.2586	52.6908	7.55207	8.51752	6.20095	8.27188	cis
17526820	Bco2	beta-carotene oxygenase 2	170752	chr9	-	50.5333	50.5552	UNC16348040	chr9	50.6741	50.3055	51.758	7.43112	8.2622	6.1944	21.4827	cis
17526836	Tex12	testis expressed gene 12	66654	chr9	-	50.5572	50.5613	UNC16344015	chr9	50.3114	49.0288	51.652	7.50928	8.49455	6.18034	7.72534	cis
17526843	Sdhd	succinate dehydrogenase complex, subunit D, integral membrane protein	66925	chr9	-	50.5964	50.6038	UNC16347237	chr9	50.6031	50.1226	52.2413	7.52393	8.62369	6.19934	10.8513	cis
17526881	Dixdc1	DIX domain containing 1	330938	chr9	-	50.6656	50.7394	UNC16350697	chr9	50.8623	50.1226	51.4516	7.52718	8.59515	6.21058	22.1631	cis
17526917	2310030G06Rik	RIKEN cDNA 2310030G06 gene	66952	chr9	-	50.7397	50.7465	UNC16343970	chr9	50.3069	47.1865	51.758	7.36097	8.43007	6.17427	14.1387	cis
17526929	1110032A03Rik	RIKEN cDNA 1110032A03 gene	68721	chr9	-	50.7629	50.768	UNC16350912	chr9	50.8941	50.3055	51.5257	7.65512	8.45858	6.18973	43.2033	cis
17526982	Colca2	COLCA2 homolog	100502940	chr9	-	51.2703	51.2785	UNC16358112	chr9	51.5392	47.8289	52.4	7.53221	8.52256	6.22589	8.13211	cis
17527004	Fdx1	ferredoxin 1	14148	chr9	-	51.9433	51.9635	UNC16362048	chr9	51.8278	51.4516	53.7436	7.49048	8.58776	6.14619	9.51186	cis
17527016	Zc3h12c	zinc finger CCCH type containing 12C	244871	chr9	-	52.114	52.1681	UNC16363164	chr9	51.9154	50.6624	56.8642	7.42387	8.4823	6.20951	10.7146	cis
17527054	Atm	ataxia telangiectasia mutated	11920	chr9	-	53.4387	53.5367	UNC16380086	chr9	53.3395	52.6908	56.8642	7.45667	8.23392	6.22247	7.53496	cis
17527188	Tnfaip8l3	tumor necrosis factor, alpha-induced protein 8-like 3	244882	chr9	-	54.0262	54.0684	UNC16365787	chr9	52.1428	51.758	56.7452	7.56063	8.39628	6.14446	15.4045	cis
17527210	Dmxl2	Dmx-like 2	235380	chr9	-	54.3662	54.5015	UNC16400148	chr9	55.0457	52.9797	56.879	7.58334	8.46972	6.20144	22.698	cis
17527505	1700017B05Rik	RIKEN cDNA 1700017B05 gene	74211	chr9	-	57.2526	57.2626	UNC16420862	chr9	57.002	56.8134	57.6406	7.58173	8.48872	6.22596	8.61594	cis
17527520	Scamp5	secretory carrier membrane protein 5	56807	chr9	-	57.4416	57.452	UNC16427245	chr9	57.6069	56.8134	58.1123	7.2856	8.38151	6.19693	11.1601	cis
17527678	Pml	promyelocytic leukemia	18854	chr9	-	58.2199	58.2498	UNC16433237	chr9	58.2067	45.8663	59.8969	7.32092	8.25614	6.16225	7.41293	cis
17527719	Cd276	CD276 antigen	102657	chr9	-	58.5246	58.5409	UNC16438516	chr9	58.6241	58.1123	58.882	7.37309	8.44808	6.20362	36.6335	cis
17527727	Rec114	REC114 meiotic recombination protein	73673	chr9	-	58.6529	58.7415	UNC16451685	chr9	59.8969	56.8134	61.069	7.45002	8.40381	6.16493	8.2339	cis
17527769	Bbs4	Bardet-Biedl syndrome 4 (human)	102774	chr9	-	59.3226	59.3458	JAX00695365	chr9	58.828	57.8216	59.5632	7.37333	8.3181	6.16523	7.74409	cis
17527825	Gm20275	predicted gene, 20275	100504539	chr9	-	59.8263	59.9411	JAX00171723	chr9	58.5626	58.1123	59.9465	7.64314	8.45617	6.20392	46.8939	cis
17243845	Igf1os	insulin-like growth factor 1, opposite strand	627270	chr10	-	87.8265	87.8633	UNC101409337	chr10	87.711	85.1901	87.94	7.43973	8.29093	6.19654	8.83753	cis
17243888	Chpt1	choline phosphotransferase 1	212862	chr10	-	88.4528	88.5038	UNC18395859	chr10	89.2248	88.2234	89.5489	7.5452	8.21014	6.24923	11.8957	cis
17243957	Utp20	UTP20 small subunit processome component	70683	chr10	-	88.7469	88.8268	UNC18373564	chr10	87.3141	86.1137	89.1859	7.56953	8.37528	6.20059	12.0892	cis
17244070	Nr1h4	nuclear receptor subfamily 1, group H, member 4	20186	chr10	-	89.4545	89.5336	UNC18383176	chr10	88.2479	87.2854	91.1496	7.44924	8.25994	6.21642	10.2145	cis
17244085	Slc17a8	solute carrier family 17 (sodium-dependent inorganic phosphate cotransporter), member 8	216227	chr10	-	89.576	89.6212	UNC18400728	chr10	89.6007	88.2479	90.0381	7.42769	8.21336	6.28982	7.62683	cis
17244102	Scyl2	SCY1-like 2 (S. cerevisiae)	213326	chr10	-	89.6389	89.6862	UNC18407673	chr10	90.0677	86.2468	92.6068	7.54618	8.55848	6.22411	8.1336	cis
17244126	Actr6	ARP6 actin-related protein 6	67019	chr10	-	89.7122	89.7323	UNC18400728	chr10	89.6007	89.12	91.0317	7.49041	8.44379	6.29917	14.4896	cis
17527977	Glce	glucuronyl C5-epimerase	93683	chr9	-	62.0576	62.0706	UNC16484433	chr9	62.1926	59.4898	64.7032	7.54268	8.30407	6.27071	9.20848	cis
17527993	LOC102638888	uncharacterized LOC102638888	102638888	chr9	-	62.3415	62.344	UNC16493697	chr9	62.8722	61.939	64.6044	7.43835	8.05055	6.24989	15.9284	cis
17527996	Coro2b	coronin, actin binding protein, 2B	235431	chr9	-	62.4198	62.5368	UNC16483397	chr9	62.1125	60.8228	64.5277	7.52185	8.22958	6.23161	10.296	cis
17528014	Fem1b	feminization 1 homolog b (C. elegans)	14155	chr9	-	62.7921	62.8115	UNC16511609	chr9	64.4337	61.5365	64.7032	7.64665	8.45405	6.18869	8.56808	cis
17528175	Dis3l	DIS3 like exosome 3'-5' exoribonuclease	213550	chr9	-	64.3073	64.3406	JAX00696323	chr9	63.5357	62.1501	64.5277	7.49975	8.25159	6.21888	11.4627	cis
17528229	Hacd3	3-hydroxyacyl-CoA dehydratase 3	57874	chr9	-	64.9872	65.0217	UNC16520785	chr9	65.2447	64.5656	66.2819	7.5038	8.38854	6.25822	10.5507	cis
17528249	Slc51b	solute carrier family 51, beta subunit	330962	chr9	-	65.4128	65.4153	UNC16520785	chr9	65.2447	64.4203	70.138	7.52777	8.30766	6.19537	8.45705	cis
17528329	Snx1	sorting nexin 1	56440	chr9	-	66.0884	66.1266	UNC16499351	chr9	63.5486	61.3391	66.2819	7.4762	8.20709	6.18653	9.30402	cis
17528377	Aph1b	aph1 homolog B, gamma secretase subunit	208117	chr9	-	66.7753	66.7955	UNC16540582	chr9	67.0774	66.201	67.1693	7.47033	8.52783	6.17355	27.6415	cis
17528395	Aph1c	aph1 homolog C, gamma secretase subunit	68318	chr9	-	66.8154	66.8347	UNC16537330	chr9	66.7992	66.201	67.1693	7.32915	8.20335	6.17385	26.9889	cis
17528568	Fam81a	family with sequence similarity 81, member A	76886	chr9	-	70.0897	70.1424	UNC16584631	chr9	70.1877	69.9107	71.0105	7.4796	8.31946	6.15774	12.4884	cis
17528617	Mindy2	MINDY lysine 48 deubiquitinase 2	235461	chr9	-	70.6004	70.6571	UNC16591452	chr9	70.761	70.0172	71.0105	7.63471	8.38604	6.26533	15.7771	cis
17528663	Polr2m	polymerase (RNA) II (DNA directed) polypeptide M	28015	chr9	-	71.4787	71.486	UNC16605890	chr9	71.8213	70.0804	74.577	7.42012	8.40229	6.21672	14.5651	cis
17528673	Myzap	myocardial zonula adherens protein	102371	chr9	-	71.5044	71.5922	backupUNC090274933	chr9	71.0274	70.1877	72.0206	7.41768	8.15339	6.18213	13.2793	cis
17528692	Cgnl1	cingulin-like 1	68178	chr9	-	71.6268	71.7713	UNC16603741	chr9	71.6778	70.761	72.7668	7.42217	8.10318	6.17428	19.1331	cis
17528775	Ccpg1os	cell cycle progression 1, opposite strand	546143	chr9	-	72.9798	72.9854	JAX00698470	chr9	73.7423	72.3438	74.7916	7.52572	8.46533	6.25242	13.026	cis
17528778	Pigb	phosphatidylinositol glycan anchor biosynthesis, class B	55981	chr9	-	73.0085	73.0156	UNC16623158	chr9	73.2814	71.6068	73.7527	7.56804	8.43661	6.19927	14.2599	cis
17528783	Pigb	phosphatidylinositol glycan anchor biosynthesis, class B	55981	chr9	-	73.016	73.0397	UNC16650140	chr9	75.3025	72.6508	79.6531	7.37121	8.22812	6.21832	10.6328	cis
17529062	Eef1a1	eukaryotic translation elongation factor 1 alpha 1	13627	chr9	-	78.4789	78.4891	UNC090276663	chr9	79.3982	76.2922	82.7134	7.72038	8.8566	6.26892	12.9825	cis
17529076	Slc17a5	solute carrier family 17 (anion/sugar transporter), member 5	235504	chr9	-	78.5367	78.588	UNC16662328	chr9	76.1907	75.6075	80.1795	7.47779	8.3307	6.22774	14.9815	cis
17529231	Phip	pleckstrin homology domain interacting protein	83946	chr9	-	82.8716	82.9755	UNC090346834	chr9	79.6531	76.3551	85.6422	7.43076	8.41076	6.16209	10.3652	cis
17529322	Ibtk	inhibitor of Bruton agammaglobulinemia tyrosine kinase	108837	chr9	-	85.6879	85.7492	UNC16791758	chr9	85.5761	85.2545	85.6422	7.36028	8.55416	6.15955	34.7414	cis
17529383	Pgm3	phosphoglucomutase 3	109785	chr9	-	86.5528	86.5718	JAX00700777	chr9	85.9498	84.0562	97.2667	7.29555	8.08426	6.19164	8.21563	cis
17529449	Cep162	centrosomal protein 162	382090	chr9	-	87.1903	87.254	UNC16812954	chr9	86.9976	85.9162	88.3282	7.53403	8.32026	6.20835	12.2003	cis
17529561	9430037G07Rik	RIKEN cDNA 9430037G07 gene	320692	chr9	-	88.5955	88.5988	UNC16839328	chr9	89.648	89.5718	90.619	7.44431	8.62581	6.21717	42.3315	cis
17529582	9330159M07Rik	RIKEN cDNA 9330159M07 gene	319673	chr9	-	88.8422	88.8588	backupUNC090179964	chr9	88.3282	87.3122	89.5691	7.40317	8.61892	6.19807	20.846	cis
17529647	Morf4l1	mortality factor 4 like 1	21761	chr9	-	90.1037	90.1148	UNC16869833	chr9	92.3013	88.4968	94.2732	7.44952	8.5021	6.16475	9.60366	cis
17529662	Tbc1d2b	TBC1 domain family, member 2B	67016	chr9	-	90.2032	90.2705	JAX00237809	chr9	92.2441	86.2577	97.2096	7.58571	8.34019	6.2165	8.64143	cis
17529699	1190002N15Rik	RIKEN cDNA 1190002N15 gene	68861	chr9	-	94.5179	94.538	UNC16905381	chr9	94.6586	92.36	95.0383	7.37184	8.29257	6.22959	11.438	cis
17529764	Pls1	plastin 1 (I-isoform)	102502	chr9	-	95.753	95.8154	JAX00174502	chr9	95.816	92.6456	96.9495	7.41619	8.13272	6.2256	12.4458	cis
17529786	Gm16794	predicted gene, 16794	100504734	chr9	-	95.9421	95.9594	UNC090485124	chr9	95.5045	95.0881	98.3129	7.45885	8.32223	6.18961	8.71524	cis
17529807	Rnf7	ring finger protein 7	19823	chr9	-	96.4712	96.4785	JAX00702705	chr9	96.8318	92.7667	97.2096	7.56559	8.37576	6.25095	13.5533	cis
17529844	Zbtb38	zinc finger and BTB domain containing 38	245007	chr9	-	96.6837	96.7301	UNC090357185	chr9	96.7334	95.6259	97.2096	7.56134	8.70402	6.18839	13.1082	cis
17529871	Pxylp1	2-phosphoxylose phosphatase 1	235534	chr9	-	96.8235	96.8927	UNC090190668	chr9	97.4195	92.9112	99.9887	7.4979	8.52178	6.17681	12.4702	cis
17529930	Clstn2	calsyntenin 2	64085	chr9	-	97.4448	98.0331	UNC16961819	chr9	98.6873	98.1948	98.924	7.33625	8.30925	6.17619	17.4856	cis
17244175	Slc25a3	solute carrier family 25 (mitochondrial carrier, phosphate carrier), member 3	18674	chr10	-	91.1166	91.124	UNC18424267	chr10	91.1496	85.102	91.266	7.54086	8.51561	6.2497	7.69677	cis
17244263	Cfap54	cilia and flagella associated protein 54	380654	chr10	-	92.7756	93.0815	UNC18439886	chr10	92.3481	91.968	93.1639	7.52088	8.41998	6.16809	24.5141	cis
17244341	Elk3	ELK3, member of ETS oncogene family	13713	chr10	-	93.2485	93.3111	UNC18431486	chr10	91.7516	91.1496	94.0601	7.53352	8.51065	6.22994	8.73543	cis
17244350	Amdhd1	amidohydrolase domain containing 1	71761	chr10	-	93.5237	93.5399	UNC18451537	chr10	93.3192	91.7516	93.637	7.43759	8.24557	6.22327	22.0505	cis
17244395	Vezt	vezatin, adherens junctions transmembrane protein	215008	chr10	-	93.9392	94.0357	UNC18473901	chr10	94.6546	94.4167	95.0027	7.48145	8.47529	6.17368	28.5321	cis
17530141	Pccb	propionyl Coenzyme A carboxylase, beta polypeptide	66904	chr9	-	100.982	101.035	UNC16994377	chr9	101.045	100.052	101.552	7.49519	8.24633	6.26235	20.5477	cis
17530159	Ppp2r3a	protein phosphatase 2, regulatory subunit B'', alpha	235542	chr9	-	101.105	101.252	UNC16997555	chr9	101.324	100.052	101.552	7.51632	8.48299	6.24041	32.0646	cis
17530203	Cep63	centrosomal protein 63	28135	chr9	-	102.587	102.626	UNC17010283	chr9	102.347	101.689	103.882	7.48261	8.26414	6.14425	9.82352	cis
17530233	Srprb	signal recognition particle receptor, B subunit	20818	chr9	-	103.188	103.202	JAX00175059	chr9	103.217	103.091	103.301	7.46843	8.45377	6.17335	59.1258	cis
17530269	1300017J02Rik	RIKEN cDNA 1300017J02 gene	71775	chr9	-	103.251	103.305	UNC090280403	chr9	103.201	103.055	103.301	7.49374	8.3863	6.23706	34.06	cis
17530291	Cdv3	carnitine deficiency-associated gene expressed in ventricle 3	321022	chr9	-	103.354	103.366	UNC17023099	chr9	103.32	103.06	103.679	7.53334	8.43587	6.197	26.9604	cis
17530339	Ackr4	atypical chemokine receptor 4	252837	chr9	-	104.084	104.127	UNC17036696	chr9	104.1	103.638	105.069	7.38262	8.47565	6.19026	23.0994	cis
17530348	Dnajc13	DnaJ heat shock protein family (Hsp40) member C13	235567	chr9	-	104.152	104.263	JAX00175136	chr9	104.239	103.691	105.695	7.4484	8.40134	6.19125	7.83093	cis
17530406	Acpp	acid phosphatase, prostate	56318	chr9	-	104.289	104.338	UNC17036696	chr9	104.1	103.735	104.538	7.55183	8.25057	6.20451	28.3452	cis
17530424	Nudt16	nudix (nucleoside diphosphate linked moiety X)-type motif 16	75686	chr9	-	105.129	105.132	UNC17062482	chr9	105.643	104.919	106.185	7.59455	8.76872	6.19889	15.9783	cis
17530457	Atp2c1	ATPase, Ca++-sequestering	235574	chr9	-	105.412	105.527	UNC17056765	chr9	105.281	104.919	105.554	7.29324	8.18165	6.23526	15.3412	cis
17530540	Col6a5	collagen, type VI, alpha 5	665033	chr9	-	105.862	105.961	UNC17075441	chr9	106.421	105.163	107.607	7.48482	8.40398	6.19963	8.63614	cis
17530623	Glyctk	glycerate kinase	235582	chr9	-	106.154	106.158	UNC17056765	chr9	105.281	103.691	106.672	7.48361	8.1625	6.26918	10.736	cis
17530633	Ppm1m	protein phosphatase 1M	67905	chr9	-	106.195	106.2	UNC17076236	chr9	106.483	105.513	107.607	7.62568	8.4405	6.24331	8.93091	cis
17530686	Abhd14a	abhydrolase domain containing 14A	68644	chr9	-	106.44	106.448	UNC17077443	chr9	106.564	106.138	106.866	7.44807	8.34276	6.1721	39.6973	cis
17530703	Parp3	poly (ADP-ribose) polymerase family, member 3	235587	chr9	-	106.471	106.477	UNC17077443	chr9	106.564	105.481	107.607	7.595	8.43367	6.20784	15.6195	cis
17530742	Tex264	testis expressed gene 264	21767	chr9	-	106.659	106.686	JAX00175391	chr9	107.633	106.606	107.699	7.37993	8.08488	6.16651	9.83861	cis
17530755	Rad54l2	RAD54 like 2 (S. cerevisiae)	81000	chr9	-	106.688	106.789	UNC17086614	chr9	107.493	105.794	107.699	7.54447	8.43811	6.26817	16.6071	cis
17530863	Mapkapk3	mitogen-activated protein kinase-activated protein kinase 3	102626	chr9	-	107.255	107.29	UNC17080330	chr9	106.866	106.138	107.607	7.53687	8.41393	6.17874	30.6558	cis
17530915	Gm9917	predicted gene 9917	100038755	chr9	-	107.56	107.568	UNC17083619	chr9	107.29	105.794	107.607	7.38338	8.26183	6.18349	19.9547	cis
17531080	Rnf123	ring finger protein 123	84585	chr9	-	108.052	108.083	UNC17088221	chr9	107.681	106.564	108.226	7.30554	8.14984	6.19461	9.04219	cis
17531176	Tcta	T cell leukemia translocation altered gene	102791	chr9	-	108.303	108.306	UNC17071318	chr9	106.097	104.919	109.046	7.60646	8.3442	6.2058	7.72238	cis
17531693	Rtp3	receptor transporter protein 3	235636	chr9	-	110.985	110.99	UNC17099945	chr9	109.046	108.401	111.425	7.53028	8.13312	6.23349	12.1768	cis
17531709	Mlh1	mutL homolog 1	17350	chr9	-	111.228	111.272	UNC17124793	chr9	111.379	110.97	111.425	7.41182	8.13605	6.17804	60.1898	cis
17531877	Crtap	cartilage associated protein	56693	chr9	-	114.375	114.391	UNC17166881	chr9	113.931	113.658	115.585	7.52772	8.6208	6.16727	10.5901	cis
17531900	Cnot10	CCR4-NOT transcription complex, subunit 10	78893	chr9	-	114.586	114.64	UNC17170714	chr9	114.39	113.113	114.811	7.46734	8.31736	6.25941	11.7455	cis
17531932	Cmtm8	CKLF-like MARVEL transmembrane domain containing 8	70031	chr9	-	114.789	114.844	UNC17176383	chr9	114.774	114.474	114.963	7.47967	8.36291	6.18321	31.9922	cis
17531939	Gpd1l	glycerol-3-phosphate dehydrogenase 1-like	333433	chr9	-	114.901	114.934	UNC17179735	chr9	114.945	114.774	114.963	7.54216	8.38618	6.21578	31.1658	cis
17532030	Cmc1	COX assembly mitochondrial protein 1	67899	chr9	-	118.065	118.15	UNC17212148	chr9	116.9	116.831	118.859	7.58169	8.38694	6.22811	11.0964	cis
17532113	Oxsr1	oxidative-stress responsive 1	108737	chr9	-	119.239	119.322	UNC17247123	chr9	119.236	119.062	121.297	7.50128	8.40963	6.23789	8.77156	cis
17532246	Gorasp1	golgi reassembly stacking protein 1	74498	chr9	-	119.926	119.938	UNC17245934	chr9	119.114	119.044	120.92	7.44002	8.2205	6.21081	18.5633	cis
17532418	Ano10	anoctamin 10	102566	chr9	-	122.176	122.276	UNC17286512	chr9	121.974	121.671	122.957	7.44611	8.35005	6.19868	20.6903	cis
17532442	Zfp445	zinc finger protein 445	235682	chr9	-	122.85	122.866	UNC17297629	chr9	122.872	122.851	123.042	7.47026	8.3225	6.20564	10.6865	cis
17532472	Cdcp1	CUB domain containing protein 1	109332	chr9	-	123.171	123.216	UNC17300373	chr9	123.113	123.042	123.591	7.65532	8.58204	6.23543	31.1259	cis
17532526	Lztfl1	leucine zipper transcription factor-like 1	93730	chr9	-	123.696	123.718	UNC17307925	chr9	123.634	123.049	124.01	7.55294	8.19109	6.21474	9.84215	cis
17532540	Gm17021	predicted gene 17021	102639738	chr9	-	123.772	123.852	JAX00176595	chr9	123.767	122.95	123.936	7.43434	8.66372	6.22831	11.2152	cis
17532577	2010315B03Rik	RIKEN cDNA 2010315B03 gene	630836	chr9	-	124.292	124.313	UNC17313094	chr9	124.134	122.933	124.153	7.56132	8.56196	6.22003	8.39853	cis
17244435	Cep83os	centrosomal protein 83, opposite strand	67723	chr10	-	94.6739	94.6886	UNC18475428	chr10	94.8159	94.67	95.0027	7.54508	8.37456	6.19263	48.4393	cis
17244476	Cradd	CASP2 and RIPK1 domain containing adaptor with death domain	12905	chr10	-	95.1749	95.3241	UNC18483765	chr10	95.3632	94.9606	95.5658	7.53562	8.30383	6.22811	30.9766	cis
17244506	Mrpl42	mitochondrial ribosomal protein L42	67270	chr10	-	95.4808	95.5005	UNC18494429	chr10	96.1808	94.9606	97.0095	7.55464	8.51766	6.23646	19.6416	cis
17244514	Nudt4	nudix (nucleoside diphosphate linked moiety X)-type motif 4	71207	chr10	-	95.5473	95.5641	UNC18482377	chr10	95.27	94.0601	95.5658	7.48711	8.54182	6.22734	13.5355	cis
17532893	Prickle3	prickle planar cell polarity protein 3	54630	chrX	+	7.65734	7.66791	UNC30614651	chrX	6.86459	5.45483	8.54841	7.59085	8.43428	6.20454	13.4236	cis
17532908	Gpkow	G patch domain and KOW motifs	209416	chrX	+	7.69714	7.70946	UNC30621040	chrX	7.59912	7.47182	10.991	7.41314	8.42113	6.23093	10.6074	cis
17532947	Praf2	PRA1 domain family 2	54637	chrX	+	7.72845	7.73097	UNC30645640	chrX	10.9624	7.47182	10.991	7.61131	8.54436	6.27615	35.4514	cis
17533031	Pim2	proviral integration site 2	18715	chrX	+	7.87832	7.88342	UNC30622947	chrX	7.82972	7.08555	9.08401	7.51292	8.28842	6.1473	8.61547	cis
17533199	Lancl3	LanC lantibiotic synthetase component C-like 3 (bacterial)	236285	chrX	+	9.20001	9.2675	UNC30634815	chrX	9.75128	6.9983	10.7118	7.46496	8.28615	6.20148	8.04461	cis
17533234	Sytl5	synaptotagmin-like 5	236643	chrX	+	9.88567	9.99452	UNC30626136	chrX	8.1946	7.16043	10.8339	7.65618	8.5815	6.26469	9.03315	cis
17214421	Zfand2b	zinc finger, AN1 type domain 2B	68818	chr1	+	75.1688	75.1713	backupUNC010151687	chr1	78.6679	73.4156	82.0921	7.5018	8.498	6.25122	17.126	cis
17214543	Gmppa	GDP-mannose pyrophosphorylase A	69080	chr1	+	75.436	75.4431	UNC961572	chr1	75.8773	74.2471	76.2237	7.36889	8.27382	6.18353	12.4921	cis
17214593	Stk11ip	serine/threonine kinase 11 interacting protein	71728	chr1	+	75.5216	75.5366	UNC955645	chr1	75.4588	73.9457	76.4671	7.63838	8.87548	6.20327	9.18741	cis
17244591	4930430F08Rik	RIKEN cDNA 4930430F08 gene	68281	chr10	-	100.572	100.589	UNC100119049	chr10	103.827	100	108.089	7.48116	8.36053	6.30059	17.5382	cis
17244661	Tmtc2	transmembrane and tetratricopeptide repeat containing 2	278279	chr10	-	105.19	105.574	JAX00297736	chr10	104.504	103.242	110.347	7.47814	8.18423	6.19457	11.245	cis
17244679	Mettl25	methyltransferase like 25	216292	chr10	-	105.763	105.841	JAX00022117	chr10	108.299	102.139	109.856	7.48131	8.31296	6.26252	7.9622	cis
17244705	Acss3	acyl-CoA synthetase short-chain family member 3	380660	chr10	-	106.937	107.124	UNC18638636	chr10	105.975	105.382	107.338	7.65515	8.39345	6.20838	15.9281	cis
17534720	Hprt	hypoxanthine guanine phosphoribosyl transferase	15452	chrX	+	52.9881	53.0213	JAX00711757	chrX	53.159	52.7152	53.6062	7.67492	8.37561	6.26606	23.2006	cis
17535233	Fmr1nb	fragile X mental retardation 1 neighbor	207854	chrX	+	68.7618	68.8046	backupJAX00713355	chrX	70.3375	60.5254	70.9573	7.63538	9.00927	6.33231	13.3548	cis
17535298	Mtm1	X-linked myotubular myopathy gene 1	17772	chrX	+	71.2108	71.3147	UNC30940542	chrX	70.3886	70.2756	73.0679	7.64011	8.61664	6.22148	8.52657	cis
17535319	Mtmr1	myotubularin related protein 1	53332	chrX	+	71.3648	71.4176	UNC200503488	chrX	72.9012	71.2029	83.958	7.51662	8.35193	6.19894	13.6879	cis
17535767	Rpl10	ribosomal protein L10	110954	chrX	+	74.2708	74.2731	UNC30960300	chrX	73.0293	71.6226	75.4224	7.36073	8.26625	6.19964	13.0571	cis
17535877	Ikbkg	inhibitor of kappaB kinase gamma	16151	chrX	+	74.3933	74.4538	JAX00713939	chrX	75.3856	73.9697	75.4894	7.62729	8.72468	6.17193	10.6781	cis
17244843	Syt1	synaptotagmin I	20979	chr10	-	108.498	109.011	UNC18674868	chr10	108.333	108.041	109.07	7.44948	8.4252	6.17181	28.9257	cis
17244937	4933440J02Rik	RIKEN cDNA 4933440J02 gene	71321	chr10	-	111.587	111.594	UNC18720024	chr10	111.411	111.352	111.625	7.39242	8.07343	6.19429	58.805	cis
17244967	Atxn7l3b	ataxin 7-like 3B	382423	chr10	-	112.926	112.929	JAX00299173	chr10	113.19	112.346	114.25	7.34436	8.00582	6.14963	48.0136	cis
17244973	Trhde	TRH-degrading enzyme	237553	chr10	-	114.4	114.801	JAX00299397	chr10	114.789	114.643	115.061	7.47773	8.61999	6.25035	34.7142	cis
17536329	Gspt2	G1 to S phase transition 2	14853	chrX	+	94.6361	94.643	UNC31107180	chrX	94.6754	93.9019	95.0227	7.54068	8.38808	6.24027	23.2845	cis
17536496	Tmem28	transmembrane protein 28	620592	chrX	+	99.8211	99.8487	UNC31134948	chrX	99.2902	97.2706	101.231	7.51533	8.32346	6.16267	14.4633	cis
17536501	Eda	ectodysplasin-A	13607	chrX	+	99.9756	100.398	UNC31133929	chrX	99.1736	97.2706	101.281	7.31486	8.45591	6.20587	9.72088	cis
17536742	Nono	non-POU-domain-containing, octamer binding protein	53610	chrX	+	101.429	101.448	UNC31149689	chrX	101.416	100.275	102.193	7.58767	8.37086	6.25577	14.0227	cis
17536773	Taf1	TATA-box binding protein associated factor 1	270627	chrX	+	101.533	101.601	UNC31149689	chrX	101.416	95.0645	105.194	7.49311	8.28699	6.25388	8.3893	cis
17536979	Tsix	X (inactive)-specific transcript, opposite strand	22097	chrX	+	103.432	103.484	UNC31166226	chrX	104.001	102.348	104.675	7.29918	8.14373	6.12058	22.1019	cis
17536984	Jpx	Jpx transcript, Xist activator (non-protein coding)	70252	chrX	+	103.494	103.506	UNC31162800	chrX	103.528	103.474	104.535	7.53343	8.32345	6.13894	22.3624	cis
17537003	Uprt	uracil phosphoribosyltransferase	331487	chrX	+	104.483	104.507	UNC31165250	chrX	103.865	101.725	104.819	7.70717	8.57148	6.23657	24.3225	cis
17537283	Dach2	dachshund family transcription factor 2	93837	chrX	+	113.298	113.835	UNC31223773	chrX	113.501	109.099	129.454	7.79649	8.7496	6.25932	21.8184	cis
17537742	Armcx1	armadillo repeat containing, X-linked 1	78248	chrX	+	134.718	134.722	UNC31343349	chrX	134.627	134.509	135.954	7.43533	8.24279	6.17436	16.0022	cis
17537756	Armcx3	armadillo repeat containing, X-linked 3	71703	chrX	+	134.757	134.76	UNC31343200	chrX	134.596	134.509	136.304	7.59507	8.69111	6.24326	9.85294	cis
17537815	Gprasp1	G protein-coupled receptor associated sorting protein 1	67298	chrX	+	135.743	135.803	UNC31347593	chrX	135.079	133.986	137.63	7.62767	8.52642	6.2563	14.3775	cis
17537878	Bex4	brain expressed X-linked 4	406217	chrX	+	136.14	136.14	UNC31334791	chrX	133.425	130.193	138.969	7.69102	8.37337	6.28023	9.82567	cis
17537889	Tceal9	transcription elongation factor A like 9	22381	chrX	+	136.245	136.247	UNC31352991	chrX	135.954	135.323	136.486	7.50056	8.44527	6.18001	24.0883	cis
17537906	Kir3dl1	killer cell immunoglobulin-like receptor, three domains, long cytoplasmic tail, 1	245616	chrX	+	136.531	136.534	UNC31360393	chrX	136.809	134.596	138.969	7.56086	8.49804	6.2111	8.69469	cis
17245034	Rab21	RAB21, member RAS oncogene family	216344	chr10	-	115.29	115.316	UNC18772249	chr10	115.081	114.804	115.772	7.39722	8.39947	6.16624	22.1118	cis
17245044	Tmem19	transmembrane protein 19	67226	chr10	-	115.341	115.362	UNC18772249	chr10	115.081	114.996	115.772	7.44379	8.28736	6.19992	21.916	cis
17245152	Rab3ip	RAB3A interacting protein	216363	chr10	-	116.906	116.939	JAX00299922	chr10	117.967	115.462	119.127	7.4215	8.0119	6.17829	13.388	cis
17245202	Yeats4	YEATS domain containing 4	64050	chr10	-	117.215	117.224	UNC18808038	chr10	117.548	115.798	117.87	7.52171	8.51514	6.21023	33.483	cis
17245223	Lyz2	lysozyme 2	17105	chr10	-	117.277	117.282	UNC18788324	chr10	116.112	114.996	117.989	7.56504	8.21622	6.23454	8.71584	cis
17538109	Tbc1d8b	TBC1 domain family, member 8B	245638	chrX	+	139.685	139.752	UNC31384274	chrX	139.787	136.486	140.938	7.56639	8.46646	6.2202	9.95046	cis
17538161	Prps1	phosphoribosyl pyrophosphate synthetase 1	19139	chrX	+	140.457	140.476	UNC31393552	chrX	140.932	139.929	141.712	7.57953	8.39159	6.19461	12.1717	cis
17538575	Alas2	aminolevulinic acid synthase 2, erythroid	11656	chrX	+	150.547	150.571	UNC31456355	chrX	150.827	144.453	153.533	7.70266	8.92187	6.21967	9.69236	cis
17539303	Phka2	phosphorylase kinase alpha 2	110094	chrX	+	160.502	160.599	UNC200246879	chrX	160.471	158.464	163.245	7.5187	8.09157	6.22029	15.377	cis
17539395	Rai2	retinoic acid induced 2	24004	chrX	+	161.717	161.779	UNC31536988	chrX	162.553	160.305	163.245	7.52323	8.43043	6.23102	10.3899	cis
17539434	Ctps2	cytidine 5'-triphosphate synthase 2	55936	chrX	+	162.901	163.032	backupJAX00722521	chrX	162.973	162.807	163.245	7.37842	8.07728	6.15318	30.0092	cis
17539519	Pir	pirin	69656	chrX	+	164.269	164.373	UNC31550037	chrX	164.17	162.641	168.032	7.43577	8.36081	6.13932	13.4033	cis
17539781	Ccnb3	cyclin B3	209091	chrX	-	6.97979	7.04161	JAX00708714	chrX	7.08555	5.45483	10.991	7.67902	8.52916	6.30677	13.8591	cis
17539914	Pqbp1	polyglutamine binding protein 1	54633	chrX	-	7.89467	7.89927	JAX00176671	chrX	5.96326	5.45483	7.82972	7.56252	8.39581	6.1858	9.51604	cis
17539979	Glod5	glyoxalase domain containing 5	69824	chrX	-	8.00424	8.01844	JAX00708711	chrX	7.08495	5.45483	10.991	7.56857	8.51713	6.22791	22.5981	cis
17245383	Helb	helicase (DNA) B	117599	chr10	-	120.084	120.113	UNC18843813	chr10	119.971	119.152	121.261	7.6107	8.46876	6.27943	8.49056	cis
17540273	1810030O07Rik	RIKEN cDNA 1810030O07 gene	69155	chrX	-	12.6551	12.6737	JAX00709415	chrX	12.8518	12.4435	16.7852	7.49971	8.41428	6.24496	19.0305	cis
17540455	LOC100503338	uncharacterized LOC100503338	100503338	chrX	-	19.1575	19.1672	UNC30720871	chrX	20.8879	13.4693	36.2349	7.45769	8.26505	6.15345	7.62068	cis
17540465	Slc9a7	solute carrier family 9 (sodium/hydrogen exchanger), member 7	236727	chrX	-	20.1058	20.2918	UNC200349871	chrX	18.1301	14.5063	23.487	7.5712	8.63519	6.20135	9.65113	cis
17541036	Ndufa1	NADH dehydrogenase (ubiquinone) 1 alpha subcomplex, 1	54405	chrX	-	37.1876	37.1912	UNC30749597	chrX	37.8191	36.5095	38.7353	7.4904	8.21321	6.1987	8.56504	cis
17541567	Firre	functional intergenic repeating RNA element	103012	chrX	-	50.5559	50.6353	UNC30813296	chrX	50.097	49.9021	50.8376	7.47614	8.487	6.1554	34.4358	cis
17541668	Gpc4	glypican 4	14735	chrX	-	52.0567	52.1651	UNC200011964	chrX	52.2878	51.7794	53.1785	7.22208	8.07966	6.15707	12.2327	cis
17541760	Mospd1	motile sperm domain containing 1	70380	chrX	-	53.3452	53.3705	UNC200092423	chrX	54.1168	53.2802	70.4234	7.5034	8.57555	6.17008	7.99523	cis
17245433	Msrb3	methionine sulfoxide reductase B3	320183	chr10	-	120.782	120.899	UNC18856683	chr10	120.898	120.601	121.261	7.43093	8.3246	6.10859	17.9326	cis
17245481	Rassf3	Ras association (RalGDS/AF-6) domain family member 3	192678	chr10	-	121.41	121.476	UNC18927664	chr10	125.377	121.425	126.04	7.4536	8.47164	6.18758	15.9409	cis
17245488	Tbk1	TANK-binding kinase 1	56480	chr10	-	121.547	121.584	backupUNC100264058	chr10	121.756	120.844	122.958	7.53208	8.54474	6.21985	18.7126	cis
17245587	Mon2	MON2 homolog, regulator of endosome to Golgi trafficking	67074	chr10	-	122.994	123.076	UNC18890997	chr10	122.958	122.815	124.104	7.59889	8.36874	6.23153	20.7382	cis
17245648	Slc16a7	solute carrier family 16 (monocarboxylic acid transporters), member 7	20503	chr10	-	125.227	125.329	UNC18907686	chr10	124.046	123.655	125.858	7.56756	8.47804	6.17313	16.4163	cis
17245665	Atp23	ATP23 metallopeptidase and ATP synthase assembly factor homolog	68876	chr10	-	126.869	126.901	UNC18961127	chr10	127.56	126.013	127.613	7.53405	8.40541	6.13782	12.3193	cis
17542167	Tmem185a	transmembrane protein 185A	236848	chrX	-	70.4598	70.4772	UNC30940542	chrX	70.3886	57.4641	83.958	7.556	9.10265	6.22011	9.29644	cis
17542180	Cd99l2	CD99 antigen-like 2	171486	chrX	-	71.4205	71.4928	UNC30947358	chrX	71.3803	70.9231	71.7114	7.54047	8.64681	6.21939	21.4377	cis
17542349	Haus7	HAUS augmin-like complex, subunit 7	73738	chrX	-	73.4374	73.459	UNC200503488	chrX	72.9012	71.2029	74.172	7.48058	8.40741	6.22248	12.4788	cis
17542751	Mpp1	membrane protein, palmitoylated	17524	chrX	-	75.1103	75.131	UNC30960300	chrX	73.0293	72.836	83.958	7.35453	8.09863	6.13593	24.7719	cis
17543045	Gk	glycerol kinase	14933	chrX	-	85.7029	85.7765	JAX00714985	chrX	85.937	85.852	86.5037	7.43137	8.29215	6.20978	49.4093	cis
17543229	Eif2s3x	eukaryotic translation initiation factor 2, subunit 3, structural gene X-linked	26905	chrX	-	94.19	94.2129	UNC31107929	chrX	95.0073	87.8379	95.0495	7.49596	8.35936	6.21624	10.0775	cis
17543460	Awat2	acyl-CoA wax alcohol acyltransferase 2	245532	chrX	-	100.402	100.443	UNC31143736	chrX	100.576	99.1543	103.528	7.48007	8.11448	6.20024	9.43012	cis
17543479	Pdzd11	PDZ domain containing 11	72621	chrX	-	100.623	100.627	UNC31145265	chrX	100.767	99.0188	101.416	7.54311	8.31167	6.19217	16.2306	cis
17543549	Snx12	sorting nexin 12	55988	chrX	-	101.098	101.223	UNC200112087	chrX	101.231	100.576	101.313	7.52701	8.14617	6.18054	26.1127	cis
17543974	Magt1	magnesium transporter 1	67075	chrX	-	105.971	106.012	UNC31176688	chrX	105.808	104.719	107.467	7.44499	8.39917	6.22425	14.1259	cis
17245700	Tspan31	tetraspanin 31	67125	chr10	-	127.067	127.07	JAX00023513	chr10	126.938	126.118	127.351	7.3905	8.12057	6.23568	21.6818	cis
17245709	Os9	amplified in osteosarcoma	216440	chr10	-	127.095	127.121	UNC18961610	chr10	127.592	127.085	127.613	7.45217	8.35558	6.14531	26.0503	cis
17245729	Slc26a10	solute carrier family 26, member 10	216441	chr10	-	127.171	127.181	UNC18960982	chr10	127.55	125.914	127.808	7.50604	8.56656	6.16646	20.3266	cis
17246019	Nab2	Ngfi-A binding protein 2	17937	chr10	-	127.661	127.669	UNC18962242	chr10	127.67	127.592	127.835	7.50994	8.19574	6.21382	13.2116	cis
17246033	Gm16230	predicted gene 16230	102632898	chr10	-	127.672	127.677	UNC18962917	chr10	127.745	127.613	127.826	7.38525	8.33659	6.14617	25.5555	cis
17544399	Sytl4	synaptotagmin-like 4	27359	chrX	-	133.936	133.982	UNC31336049	chrX	133.67	132.362	134.136	7.43915	8.27719	6.20812	16.2101	cis
17544453	Trmt2b	TRM2 tRNA methyltransferase 2B	215201	chrX	-	134.224	134.277	UNC31340786	chrX	134.32	134.096	134.532	7.54163	8.33892	6.20611	16.5447	cis
17544717	Tceal8	transcription elongation factor A (SII)-like 8	66684	chrX	-	136.169	136.172	UNC31349098	chrX	135.323	134.596	136.486	7.58138	8.47702	6.15701	9.42547	cis
17544878	Morc4	microrchidia 4	75746	chrX	-	139.822	139.871	UNC31385860	chrX	139.987	131.204	140.342	7.58754	8.47924	6.21714	10.578	cis
17544919	Nup62cl	nucleoporin 62 C-terminal like	279706	chrX	-	140.008	140.063	UNC31385919	chrX	139.995	139.863	141.318	7.45224	8.44608	6.18967	9.57496	cis
17545051	Acsl4	acyl-CoA synthetase long-chain family member 4	50790	chrX	-	142.319	142.39	UNC31407291	chrX	142.777	141.242	143.655	7.63737	8.57073	6.25266	9.26665	cis
17545078	Ammecr1	Alport syndrome, mental retardation, midface hypoplasia and elliptocytosis chromosomal region gene 1	56068	chrX	-	142.852	142.966	UNC31408369	chrX	142.903	142.696	143.655	7.53881	8.68043	6.2075	8.43405	cis
17545430	Kantr	Kdm5c adjacent non-coding transcript	72997	chrX	-	152.297	152.327	UNC31467262	chrX	152.44	144.214	153.046	7.52329	8.43646	6.21082	10.0716	cis
17246043	Rdh7	retinol dehydrogenase 7	54150	chr10	-	127.884	127.889	UNC18963711	chr10	127.835	127.808	130.548	7.58772	8.46983	6.24925	15.0355	cis
17246057	Hsd17b6	hydroxysteroid (17-beta) dehydrogenase 6	27400	chr10	-	127.991	128.007	UNC18963711	chr10	127.835	127.826	128.213	7.58815	8.85273	6.30021	24.1155	cis
17246067	Rbms2	RNA binding motif, single stranded interacting protein 2	56516	chr10	-	128.13	128.18	UNC18963815	chr10	127.848	127.592	128.763	7.51061	8.15674	6.20471	7.54472	cis
17246084	Spryd4	SPRY domain containing 4	66701	chr10	-	128.21	128.212	JAX00302371	chr10	128.284	127.56	128.936	7.5474	8.32326	6.22614	9.31199	cis
17246113	Slc39a5	solute carrier family 39 (metal ion transporter), member 5	72002	chr10	-	128.396	128.4	JAX00302406	chr10	128.483	127.808	128.687	7.4577	8.33007	6.21388	10.3977	cis
17246163	Esyt1	extended synaptotagmin-like protein 1	23943	chr10	-	128.51	128.526	UNC18971228	chr10	128.557	127.696	128.687	7.51019	8.50773	6.17814	16.0409	cis
17246231	Erbb3	erb-b2 receptor tyrosine kinase 3	13867	chr10	-	128.568	128.59	JAX00302382	chr10	128.348	127.763	130.548	7.50087	8.40624	6.20705	9.58107	cis
17545936	Car5b	carbonic anhydrase 5b, mitochondrial	56078	chrX	-	163.977	164.028	backupUNC200838158	chrX	167.125	163.245	168.032	7.57607	8.59862	6.21283	14.934	cis
17546040	Rab9	RAB9, member RAS oncogene family	56382	chrX	-	166.457	166.48	UNC31568433	chrX	166.513	164.468	168.032	7.52846	8.32295	6.1978	15.2235	cis
17246310	Dgka	diacylglycerol kinase, alpha	13139	chr10	-	128.72	128.744	UNC18973683	chr10	128.821	128.557	128.936	7.6477	8.43347	6.23558	34.6954	cis
17246358	Rdh5	retinol dehydrogenase 5	19682	chr10	-	128.914	128.919	UNC18967123	chr10	128.164	127.808	130.548	7.63165	8.66764	6.21391	7.93633	cis
[truncated: 3,210 more rows]

## Sheet: Table S2
Supplemental Table 2. Distribution of cis and trans eQTL and mirQTL defined by a 1 Mbp interval window.
Run	Additive model	Interactive model	High fat cholic acid	High protein
mRNA
Cis (% total)	4284 (64.01)	3661 (59.48)	2290 (53.68)	1622 (47.50)
Trans (% total)	2408 (35.98)	2494 (40.52)	2580 (46.32)	1793 (52.50)
Total	6692	6155	5570	3415
miRNA
Cis (% total)	15 (40)	6 (26)	5 (29)	0
Trans (% total)	22 (60)	17 (74)	12 (71)	12
Total	37	23	17	12

## Sheet: Table S3
Supplemental Table 3: List of all significant trans-eQTL found in the liver of DO mice using diet as an additive covariate.
Transcription cluster ID	Gene symbol	Gene name	ENTREZID	Probe position				SNP markers ID	Marker position				LOD threshold at P<0.05	LOD threshold at P<0.01	LOD threshold at P<0.63	Obtained LOD score	eQTL type
				Chromosome	Strand	Start (Mb)	Stop (Mb)		Chromosome	Position (Mb)	BCI low (Mb)	BCI high (Mb)
17210855	Lypla1	lysophospholipase 1	18777	chr1	+	4.80792	4.84579	UNC13081192	chr7	70.5117	70.4891	72.1814	7.39548	8.13726	6.23453	7.52049	trans
17211023	3110035E14Rik	RIKEN cDNA 3110035E14 gene	76982	chr1	+	9.60123	9.62661	UNC30381154	chr19	45.218	44.5992	47.5102	7.43314	8.13731	6.20975	7.53819	trans
17234345	Gm5779	ribosomal protein, large, P0 pseudogene	544707	chr10	+	75.3522	75.3528	UNC9972703	chr5	115.824	114.543	117.638	7.54592	8.2505	6.14766	7.85755	trans
17234363	4933407G14Rik	RIKEN cDNA 4933407G14 gene	71125	chr10	+	75.4496	75.4631	JAX00112667	chr3	123.443	120.21	125.598	7.62151	8.45757	6.28489	8.37447	trans
17427459	LOC102637515	uncharacterized LOC102637515	102637515	chr4	-	97.8625	97.8688	UNC20765953	chr12	26.6695	16.6127	31.4639	7.54621	8.37697	6.18975	7.55427	trans
17427628	B020004J07Rik	RIKEN cDNA B020004J07 gene	545662	chr4	-	101.835	101.838	UNC020469261	chr2	102.495	97.9423	104.277	7.43202	8.4419	6.18558	8.30343	trans
17427650	BB031773	expressed sequence BB031773	100473	chr4	-	103.004	103.012	JAX00634191	chr7	28.8914	28.6122	30.1539	7.40667	8.31273	6.19997	7.60124	trans
17427939	Dmrtb1	DMRT-like family B with proline-rich C-terminal, 1	56296	chr4	-	107.676	107.684	UNC6971803	chr4	29.0558	28.777	31.5774	7.4085	8.25481	6.22915	8.55257	trans
17427994	Scp2	sterol carrier protein 2, liver	20280	chr4	-	108.045	108.145	UNC_rs51900929	chr4	114.788	106.608	118.565	7.63907	8.42587	6.22399	8.34764	trans
17428032	Zyg11b	zyg-ll family member B, cell cycle regulator	414872	chr4	-	108.228	108.301	UNC12177614	chr6	136.711	135.954	138.992	7.56133	8.3408	6.19547	8.51554	trans
17428054	Gpx7	glutathione peroxidase 7	67305	chr4	-	108.4	108.407	UNC8028591	chr4	114.641	108.585	117.437	7.40693	8.10117	6.20756	12.6562	trans
17428766	Plk3	polo like kinase 3	12795	chr4	-	117.129	117.134	UNC29395365	chr18	61.2111	59.0204	61.2721	7.33633	8.25138	6.1612	7.9018	trans
17428957	Dph2	DPH2 homolog	67728	chr4	-	117.889	117.892	UNC21705923	chr12	97.6281	97.5283	98.2952	7.52353	8.18557	6.15603	7.56739	trans
17429341	AU022252	expressed sequence AU022252	230696	chr4	-	119.223	119.233	JAX00470472	chr19	11.1618	10.2415	26.9866	7.49579	8.54752	6.23105	7.64245	trans
17429355	Ybx1	Y box protein 1	22608	chr4	-	119.278	119.295	UNC30094591	chr19	24.3816	22.618	24.6454	7.45118	8.29853	6.21612	7.5124	trans
17234606	Gm10787	predicted gene 10787	100038479	chr10	+	77.012	77.0222	UNC13754333	chr7	122.177	121.678	122.363	7.40448	8.36009	6.1747	7.46407	trans
17430270	Tlr12	toll-like receptor 12	384059	chr4	-	128.615	128.619	UNC2348110	chr1	184.237	16.2477	184.66	7.50929	8.27656	6.2025	7.52607	trans
17430319	S100pbp	S100P binding protein	74648	chr4	-	129.148	129.19	JAX00656708	chr7	134.13	133.472	134.464	7.47677	8.55468	6.14772	7.50302	trans
17430662	A930031H19Rik	RIKEN cDNA A930031H19 gene	77835	chr4	-	131.001	131.01	UNC21723090	chr12	98.7557	98.2206	100.245	7.54486	8.4044	6.24594	8.47312	trans
17430674	Gm42321	predicted gene, 42321	105247176	chr4	-	131.695	131.71	UNC29749652	chr18	84.2097	84.008	88.4105	7.46305	8.40483	6.20967	7.64645	trans
17430853	Med18	mediator complex subunit 18	67219	chr4	-	132.459	132.464	UNC8348167	chr4	139.925	137.562	142.119	7.5271	8.67814	6.22632	7.81565	trans
17430930	Stx12	syntaxin 12	100226	chr4	-	132.854	132.884	JAX00072549	chr16	92.6523	91.9223	92.7889	7.52328	8.49499	6.20171	7.98588	trans
17431036	Nudc	nudC nuclear distribution protein	18221	chr4	-	133.533	133.546	JAX00053897	chr14	64.8178	64.031	66.7309	7.4791	8.28702	6.26882	7.5484	trans
17431181	Sh3bgrl3	SH3 domain binding glutamic acid-rich protein-like 3	73723	chr4	-	134.127	134.129	UNC6173528	chr3	126.078	125.915	126.833	7.54633	8.42851	6.29574	8.06644	trans
17432565	Aadacl3	arylacetamide deacetylase like 3	230883	chr4	-	144.454	144.464	UNC19074003	chr11	10.5179	10.1383	11.5854	7.423	8.47728	6.26385	7.50066	trans
17432790	Miip	migration and invasion inhibitory protein	28010	chr4	-	147.861	147.869	UNC30118998	chr19	25.7831	24.3816	27.0414	7.43127	8.32184	6.20089	7.76548	trans
17432904	Draxin	dorsal inhibitory axon guidance protein	70433	chr4	-	148.102	148.116	UNC20489186	chr11	117.487	116.881	119.183	7.38029	8.50771	6.19791	8.2776	trans
17432927	Fbxo44	F-box protein 44	230903	chr4	-	148.153	148.16	UNC30131122	chr19	26.6362	25.723	32.5167	7.44395	8.40249	6.19028	7.66138	trans
17433610	Arhgef16	Rho guanine nucleotide exchange factor (GEF) 16	230972	chr4	-	154.279	154.302	UNC24087134	chr14	61.4311	58.7829	61.697	7.44189	8.26046	6.22625	7.97893	trans
17434333	Pex1	peroxisomal biogenesis factor 1	71382	chr5	+	3.59612	3.63717	UNC8614186	chr5	9.11259	3.16008	15.7716	7.41222	8.14407	6.22181	7.41788	trans
17434973	Sema3c	sema domain, immunoglobulin domain (Ig), short basic domain, secreted, (semaphorin) 3C	20348	chr5	+	17.5744	17.73	UNC060384712	chr6	81.4958	80.503	84.7129	7.46279	8.43633	6.19562	8.51555	trans
17435474	Galnt11	polypeptide N-acetylgalactosaminyltransferase 11	231050	chr5	+	25.2464	25.2655	UNC4172668	chr2	146.897	142.131	147.561	7.29109	8.31326	6.18005	7.74205	trans
17435584	Insig1	insulin induced gene 1	231070	chr5	+	28.0715	28.0781	UNC3145495	chr2	59.387	59.185	72.657	7.44342	8.30953	6.20581	8.1034	trans
17436043	Trim54	tripartite motif-containing 54	58522	chr5	+	31.1167	31.1376	UNC13048503	chr7	68.0262	63.6675	69.5332	7.4662	8.42962	6.17996	8.6035	trans
17436107	Gckr	glucokinase regulatory protein	231103	chr5	+	31.2976	31.3272	UNC259406	chr1	22.1046	21.5913	22.3672	7.51258	8.87021	6.21479	8.49492	trans
17436407	Slc5a1	solute carrier family 5 (sodium/glucose cotransporter), member 1	20537	chr5	+	33.1042	33.1628	UNC3354018	chr2	75.7739	63.582	86.3844	7.36196	8.37907	6.16716	7.9554	trans
17436438	Uvssa	UV stimulated scaffold protein A	71101	chr5	+	33.3787	33.415	JAX00579261	chr5	37.4639	32.1146	38.7834	7.59384	8.13322	6.22196	7.74009	trans
17436938	Ccdc96	coiled-coil domain containing 96	66717	chr5	+	36.4846	36.4881	UNC25008976	chr15	9.146	7.49649	10.0767	7.56133	8.21109	6.20514	14.5867	trans
17437148	C1qtnf7	C1q and tumor necrosis factor related protein 7	109323	chr5	+	43.5156	43.6186	UNC24265383	chr14	75.1963	72.9321	77.7251	7.41191	8.13966	6.18521	7.65514	trans
17437156	Cc2d2a	coiled-coil and C2 domain containing 2A	231214	chr5	+	43.6624	43.7409	UNC8968225	chr5	37.0557	35.8999	45.4592	7.48488	8.25669	6.24386	15.5066	trans
17437231	4930431F12Rik	RIKEN cDNA 4930431F12 gene	75783	chr5	+	44.9671	44.9786	UNC1783074	chr1	139.097	138.676	150.872	7.47835	8.03993	6.27252	7.54775	trans
17437247	Lap3	leucine aminopeptidase 3	66988	chr5	+	45.4934	45.5121	UNC18777915	chr10	115.462	114.342	117.842	7.53169	8.40975	6.21739	8.5607	trans
17437790	Ube2k	ubiquitin-conjugating enzyme E2K	53323	chr5	+	65.5373	65.5978	UNC9003285	chr5	39.344	37.2793	39.4367	7.48646	8.32647	6.22992	7.50725	trans
17438485	Rest	RE1-silencing transcription factor	19712	chr5	+	77.2655	77.2859	JAX00587532	chr5	83.7687	77.2685	90.4021	7.56705	8.39995	6.21308	9.75657	trans
17438584	Stap1	signal transducing adaptor family member 1	56792	chr5	+	86.0718	86.104	JAX00132890	chr5	90.4249	83.3818	91.3906	7.38153	8.31596	6.17345	12.0854	trans
17438621	Ugt2b35	UDP glucuronosyltransferase 2 family, polypeptide B35	243085	chr5	+	87.0009	87.0131	UNC24684028	chr14	106.778	104.117	110.641	7.46699	8.1068	6.22667	7.79125	trans
17438823	Dck	deoxycytidine kinase	13178	chr5	+	88.765	88.7823	UNC6173528	chr3	126.078	123.91	127.343	7.43028	8.12775	6.20704	8.157	trans
17438963	Ppbp	pro-platelet basic protein	57349	chr5	+	90.7685	90.77	UNC8207612	chr4	129.336	127.497	134.223	7.59189	8.8517	6.21916	8.04503	trans
17438987	Cxcl1	chemokine (C-X-C motif) ligand 1	14825	chr5	+	90.8912	90.8931	UNC18830534	chr10	119.127	117.935	122.744	7.53791	8.63717	6.27913	8.2793	trans
17439037	Parm1	prostate androgen-regulated mucin-like protein 1	231440	chr5	+	91.5178	91.6268	UNC9719635	chr5	96.5749	91.3679	96.9207	7.28262	8.24808	6.15227	12.2768	trans
17439131	Stbd1	starch binding domain 1	52331	chr5	+	92.6031	92.6062	UNC12939762	chr7	58.6887	50.3199	61.6031	7.47448	8.66398	6.19443	7.55325	trans
17439184	Ccng2	cyclin G2	12452	chr5	+	93.2675	93.2759	JAX00141068	chr6	53.5706	51.4795	54.445	7.37353	8.2628	6.14277	7.4575	trans
17439388	Fras1	Fraser extracellular matrix complex subunit 1	231470	chr5	+	96.3746	96.7823	UNC9900273	chr5	110.362	92.394	112.742	7.46357	8.29625	6.17509	13.0795	trans
17439517	Fgf5	fibroblast growth factor 5	14176	chr5	+	98.2542	98.2768	UNC29363438	chr18	59.2535	59.0204	60.3543	7.6126	8.32816	6.26877	9.1077	trans
17439585	2310034O05Rik	RIKEN cDNA 2310034O05 gene	69571	chr5	+	100.211	100.218	UNC23394824	chr13	112.541	112.217	113.958	7.62928	8.64831	6.24126	7.87844	trans
17439872	Zfp33b	zinc finger protein 33B	69623	chr5	+	104.572	104.751	JAX00589606	chr5	99.4235	91.8319	104.969	7.58504	8.5878	6.18974	8.41365	trans
17440071	1700028K03Rik	RIKEN cDNA 1700028K03 gene	76421	chr5	+	107.535	107.579	UNC22450321	chr13	38.7056	37.7531	39.2033	7.63898	8.78377	6.23912	8.29572	trans
17440086	Rpap2	RNA polymerase II associated protein 2	231571	chr5	+	107.597	107.662	UNC9923297	chr5	112.231	106.165	112.789	7.57112	8.71843	6.21702	12.3855	trans
17440136	Mtf2	metal response element binding transcription factor 2	17765	chr5	+	108.066	108.107	UNC27722769	chr17	27.3765	23.5352	34.1607	7.54475	8.32913	6.20521	7.55545	trans
17440277	Tmem175	transmembrane protein 175	72392	chr5	+	108.63	108.647	UNC9813470	chr5	102.801	100.489	108.724	7.54776	8.64519	6.21311	8.57382	trans
17440293	Idua	iduronidase, alpha-L-	15932	chr5	+	108.66	108.684	UNC28874371	chr18	22.7874	20.7916	23.4651	7.40756	8.28939	6.221	7.43031	trans
17440342	Gm15446	predicted gene 15446	100642166	chr5	+	109.923	109.942	UNC18894943	chr10	123.235	121.425	124.208	7.32987	7.92988	6.14633	8.48652	trans
17440465	Pole	polymerase (DNA directed), epsilon	18973	chr5	+	110.286	110.337	JAX00533575	chr3	108.563	105.597	117.64	7.58404	8.58242	6.23358	8.01553	trans
17441037	Oasl2	2'-5' oligoadenylate synthetase-like 2	23962	chr5	+	114.897	114.912	UNC2029189	chr1	158.066	156.109	165.724	7.38154	8.23303	6.15091	7.63063	trans
17441202	Gcn1l1	GCN1 general control of amino-acid synthesis 1-like 1 (yeast)	231659	chr5	+	115.571	115.62	UNC19872086	chr11	69.8803	69.5484	70.1558	7.50977	8.41105	6.25337	7.6263	trans
17235408	Dot1l	DOT1-like, histone H3 methyltransferase (S. cerevisiae)	208266	chr10	+	80.7555	80.795	UNC20336327	chr11	107.934	105.1	109.415	7.51026	8.58879	6.16677	9.15938	trans
17235511	Gadd45b	growth arrest and DNA-damage-inducible 45 beta	17873	chr10	+	80.9301	80.9321	JAX00624765	chr6	122.972	119.51	124.439	7.54703	8.51047	6.22932	8.7479	trans
17235582	Snord37	small nucleolar RNA, C/D box 37	100217454	chr10	+	81.179	81.179	UNC11559561	chr6	88.7794	86.7644	89.2813	7.31327	8.15877	6.21145	7.38992	trans
17441540	Med13l	mediator complex subunit 13-like	76199	chr5	+	118.561	118.764	UNC100116903	chr10	102.776	100.629	107.578	7.52836	8.2108	6.22504	7.80683	trans
17441895	Naa25	N(alpha)-acetyltransferase 25, NatB auxiliary subunit	231713	chr5	+	121.398	121.441	JAX00535421	chr3	119.201	111.381	151.366	7.40651	8.38469	6.20409	7.87773	trans
17441968	Atxn2	ataxin 2	20239	chr5	+	121.711	121.815	JAX00596304	chr5	127.413	126.146	127.486	7.49042	8.35779	6.23965	11.3949	trans
17442332	Kntc1	kinetochore associated 1	208628	chr5	+	123.75	123.821	UNC8517703	chr4	154.776	154.333	154.924	8.25606	9.51841	6.51276	8.40285	trans
17443181	Dnajc30	DnaJ heat shock protein family (Hsp40) member C30	66114	chr5	+	135.064	135.065	UNC5271811	chr3	52.8638	38.9238	54.8592	7.44582	8.24784	6.18305	7.47891	trans
17443486	Cldn15	claudin 15	60363	chr5	+	136.968	136.976	UNC12029449	chr6	126.033	125.451	126.752	7.39478	8.46748	6.24025	7.776	trans
17443596	Actl6b	actin-like 6B	83766	chr5	+	137.554	137.57	UNC26488484	chr16	24.3392	23.7281	27.0511	7.60447	8.47387	6.18007	7.96218	trans
17443732	Zkscan1	zinc finger with KRAB and SCAN domains 1	74570	chr5	+	138.085	138.108	UNC19713241	chr11	58.4369	56.9701	59.3879	7.40376	8.25176	6.14275	7.52699	trans
17235740	Gm16104	predicted gene 16104	102634174	chr10	+	81.4096	81.4116	CEAJAX00041178	chr13	3.52771	3.1877	6.95117	7.59583	8.50099	6.22437	7.78347	trans
17444372	Cyth3	cytohesin 3	19159	chr5	+	143.623	143.71	UNC1968356	chr1	153.016	151.266	154.284	7.41045	8.38054	6.17698	8.79819	trans
17444664	Zfp655	zinc finger protein 655	72611	chr5	+	145.232	145.247	UNC6953823	chr4	27.8854	16.3696	27.96	7.51571	8.5145	6.19767	7.74915	trans
17445067	Rxfp2	relaxin/insulin-like family peptide receptor 2	140498	chr5	+	150.019	150.082	UNC060302008	chr6	53.0732	51.6542	56.6349	7.48127	8.59985	6.18374	8.19238	trans
17445193	Pds5b	PDS5 cohesin associated factor B	100710	chr5	+	150.674	150.808	UNC25866212	chr15	72.5002	71.8571	76.1221	7.42491	8.29989	6.20268	7.44344	trans
17445381	Gtpbp10	GTP-binding protein 10 (putative)	207704	chr5	-	5.53854	5.55954	UNC12851633	chr7	53.1183	50.5367	56.026	7.52539	8.34267	6.22036	7.63767	trans
17445539	Gm5106	predicted gene 5106	330031	chr5	-	8.77365	8.79844	UNC20503789	chr11	118.62	116.868	121.814	7.42717	8.25959	6.20104	7.59851	trans
17445642	Speer4e	spermatogenesis associated glutamate (E)-rich protein 4e	624245	chr5	-	14.9333	14.9336	UNC3981251	chr2	131.788	129.817	133.51	7.40328	8.41006	6.23338	8.9008	trans
17445746	4921504A21Rik	RIKEN cDNA 4921504A21 gene	70832	chr5	-	19.2025	19.2265	UNC3063996	chr2	52.7672	51.0571	59.7377	7.53166	8.24863	6.24522	8.05869	trans
17446017	Gm15421	ribosomal protein L22 like 1 pseudogene	100042049	chr5	-	22.5287	22.529	UNC150730	chr1	14.6599	12.1818	44.037	7.49522	8.35211	6.2052	7.52797	trans
17446289	Wdr86	WD repeat domain 86	269633	chr5	-	24.7118	24.7307	UNC5200097	chr3	48.0223	46.1512	60.0381	7.37493	8.20134	6.1118	7.41976	trans
17235915	Txnrd1	thioredoxin reductase 1	50493	chr10	+	82.834	82.8968	UNC2263378	chr1	176.061	175.511	177.579	7.46642	8.55089	6.19907	8.28205	trans
17236091	Tmem263	transmembrane protein 263	103266	chr10	+	85.1028	85.1175	UNC26760627	chr16	46.8789	45.5457	49.9023	7.53283	8.60336	6.20774	7.83385	trans
17446507	Gm10220	predicted gene 10220	434689	chr5	-	26.1152	26.1153	UNC10905864	chr6	38.0264	34.5146	47.0281	7.53812	8.5029	6.21627	7.9146	trans
17446507	Gm10220	predicted gene 10220	434689	chr5	-	26.1152	26.1153	UNC15665883	chr8	122.705	122.471	126.565	7.53812	8.5029	6.21627	8.17787	trans
17446627	Tyms	thymidylate synthase	22171	chr5	-	30.0587	30.0735	UNC26225777	chr15	101.367	100.392	101.953	7.50972	8.33974	6.21735	8.3287	trans
17446669	Adgrf3	adhesion G protein-coupled receptor F3	381628	chr5	-	30.1935	30.2057	UNC18812646	chr10	117.973	117.425	119.127	7.4434	8.2078	6.23897	7.47256	trans
17446881	Eif2b4	eukaryotic translation initiation factor 2B, subunit 4 delta	13667	chr5	-	31.1876	31.1934	UNC27828122	chr17	36.2495	31.5708	40.6022	7.44104	8.1017	6.20253	7.59018	trans
17447689	Zfp518b	zinc finger protein 518B	100515	chr5	-	38.6696	38.6847	UNC27333519	chr16	87.8435	85.8967	91.432	7.37912	8.15411	6.20054	7.53322	trans
17447803	Fbxl5	F-box and leucine-rich repeat protein 5	242960	chr5	-	43.7448	43.8216	UNC9004443	chr5	39.416	38.2178	44.7145	7.58181	8.28497	6.23175	8.54037	trans
17448050	Ccdc149	coiled-coil domain containing 149	100503884	chr5	-	52.3749	52.4715	JAX00514759	chr3	9.72774	3.16389	12.8298	7.46768	8.61095	6.25538	8.05409	trans
17448076	8030423F21Rik	RIKEN cDNA 8030423F21 gene	211001	chr5	-	52.6077	52.619	UNC29302117	chr18	55.2274	55.1413	55.9668	7.33068	8.13135	6.19167	9.12876	trans
17448231	1700027F09Rik	RIKEN cDNA 1700027F09 gene	69999	chr5	-	64.4549	64.4679	UNC6132276	chr3	123.52	120.509	125.856	7.55236	8.36533	6.24653	8.4725	trans
17448251	Tlr6	toll-like receptor 6	21899	chr5	-	64.9531	64.96	UNC1984844	chr1	154.214	153.545	173.646	7.37922	8.15097	6.20091	7.83809	trans
17448264	Rfc1	replication factor C (activator 1) 1	19687	chr5	-	65.262	65.3356	JAX00002377	chr1	34.8287	33.8912	35.153	7.50786	8.23218	6.17361	7.54346	trans
17448389	Rbm47	RNA binding motif protein 47	245945	chr5	-	66.0187	66.173	UNC9433726	chr5	71.6858	60.022	74.2819	7.36409	8.16208	6.15312	8.16933	trans
17448682	Cnga1	cyclic nucleotide gated channel alpha 1	12788	chr5	-	72.6038	72.6427	UNC12174710	chr6	136.544	135.793	137.328	7.45826	8.71859	6.18781	7.68449	trans
17236196	1810014B01Rik	RIKEN cDNA 1810014B01 gene	66263	chr10	+	86.6856	86.6947	UNC18427765	chr10	91.4355	86.1937	91.968	7.53136	8.50375	6.28533	8.60423	trans
17448924	Kdr	kinase insert domain protein receptor	16542	chr5	-	75.933	75.9784	UNC100028744	chr10	20.4554	19.7925	20.7373	7.54939	8.65571	6.20982	8.31817	trans
17449008	Aasdh	aminoadipate-semialdehyde dehydrogenase	231326	chr5	-	76.876	76.9055	UNC030522706	chr3	117.858	109.85	120.045	7.47376	8.51604	6.18867	8.01089	trans
17449129	Epha5	Eph receptor A5	13839	chr5	-	84.0551	84.4167	JAX00011136	chr1	152.377	151.465	153.593	7.59799	8.5546	6.22125	8.29657	trans
17449313	Ugt2b34	UDP glucuronosyltransferase 2 family, polypeptide B34	100727	chr5	-	86.8903	86.9069	UNC9572242	chr5	81.8204	76.6475	90.7155	7.55233	8.32435	6.16427	7.86259	trans
17449516	Cox18	cytochrome c oxidase assembly protein 18	231430	chr5	-	90.2148	90.224	UNC30128348	chr19	26.4318	25.4222	26.912	7.46526	8.61704	6.16118	7.50213	trans
17449673	Naaa	N-acylethanolamine acid amidase	67111	chr5	-	92.2586	92.2782	UNC6171783	chr3	125.915	122.412	127.132	7.56126	8.69931	6.23187	7.57529	trans
17449718	Cxcl10	chemokine (C-X-C motif) ligand 10	15945	chr5	-	92.3469	92.3489	UNC27402907	chr16	92.3192	91.0854	95.6852	7.51852	8.17278	6.21994	7.71831	trans
17449731	Nup54	nucleoporin 54	269113	chr5	-	92.4159	92.4351	UNC9720839	chr5	96.6383	90.3714	99.5884	7.39775	8.34176	6.19001	9.01023	trans
17449749	Scarb2	scavenger receptor class B, member 2	12492	chr5	-	92.4439	92.5055	UNC021713399	chr2	177.86	174.476	178.297	7.49206	8.17075	6.15307	10.2368	trans
17449989	Rasgef1b	RasGEF domain family, member 1B	320292	chr5	-	99.2175	99.2528	UNC27865586	chr17	41.9709	40.6022	43.5102	7.47932	8.18525	6.19333	7.61022	trans
17450098	Lin54	lin-54 homolog (C. elegans)	231506	chr5	-	100.442	100.501	UNC11517152	chr6	84.6304	81.1657	86.2195	7.64603	8.3323	6.21087	8.42111	trans
17450718	Fam69a	family with sequence similarity 69, member A	67266	chr5	-	107.908	107.973	JAX00133421	chr5	99.5321	99.0069	108.377	7.58279	8.25866	6.24485	9.792	trans
17450830	Slc26a1	solute carrier family 26 (sulfate transporter), member 1	231583	chr5	-	108.67	108.676	UNC18419653	chr10	90.856	89.1647	95.5658	7.37063	8.22149	6.15737	7.76558	trans
17450856	Vmn2r8	vomeronasal 2, receptor 8	627479	chr5	-	108.801	108.809	UNC23165195	chr13	97.0844	95.9132	97.6304	7.59074	8.26446	6.2335	8.92704	trans
17450918	Crlf2	cytokine receptor-like factor 2	57914	chr5	-	109.555	109.559	JAX00274402	chr1	164.874	156.37	167.196	7.35724	8.36869	6.23352	7.7608	trans
17450950	LOC105246961	zinc finger protein 431-like	105246961	chr5	-	110.046	110.046	UNC26996012	chr16	65.3938	62.4651	69.4737	7.49703	8.64838	6.20359	7.76801	trans
17451410	Sart3	squamous cell carcinoma antigen recognized by T cells 3	53890	chr5	-	113.743	113.772	UNC9869554	chr5	107.073	98.5475	115.423	7.45512	8.50316	6.15461	10.6022	trans
17451726	Cox6a1	cytochrome c oxidase subunit VIa polypeptide 1	12861	chr5	-	115.346	115.349	JAX00003163	chr1	45.3102	43.1735	51.3837	7.46772	8.18163	6.21491	7.81196	trans
17451737	Sirt4	sirtuin 4	75387	chr5	-	115.478	115.485	UNC20590943	chr12	8.17433	5.18091	10.3573	7.40671	8.24594	6.24328	7.61032	trans
17452070	Oas3	2'-5' oligoadenylate synthetase 3	246727	chr5	-	120.753	120.778	UNC2098492	chr1	164.372	159.982	165.37	7.50582	8.19333	6.25634	8.46323	trans
17452126	Oas1a	2'-5' oligoadenylate synthetase 1A	246730	chr5	-	120.896	120.908	UNC3943914	chr2	128.581	127.954	131.708	7.41908	8.27747	6.17413	7.6667	trans
17452231	Aldh2	aldehyde dehydrogenase 2, mitochondrial	11669	chr5	-	121.566	121.594	UNC19195103	chr11	18.9914	18.6685	20.8865	7.47703	8.47803	6.18991	7.48231	trans
17452552	Rhof	ras homolog family member F (in filopodia)	23912	chr5	-	123.111	123.133	UNC7808231	chr4	98.2451	97.6613	98.8414	7.44367	8.16817	6.19158	8.0978	trans
17452552	Rhof	ras homolog family member F (in filopodia)	23912	chr5	-	123.111	123.133	UNC17534973	chr10	19.6761	19.0114	20.6642	7.44367	8.16817	6.19158	7.67136	trans
17453304	Gtf2i	general transcription factor II I	14886	chr5	-	134.238	134.314	UNC1985853	chr1	154.284	150.733	155.105	7.42625	8.34515	6.21227	8.23579	trans
17453406	Lat2	linker for activation of T cells family, member 2	56743	chr5	-	134.6	134.615	UNC10153315	chr5	129.257	127.178	130.958	7.51797	8.76905	6.21253	7.55851	trans
17453935	Zan	zonadhesin	22635	chr5	-	137.379	137.477	UNC30312232	chr19	40.4819	39.5113	42.059	7.48642	8.09012	6.21417	7.79129	trans
17454043	Pop7	processing of precursor 7, ribonuclease P family, (S. cerevisiae)	74097	chr5	-	137.501	137.502	UNC19410819	chr11	35.8832	33.7341	43.5364	7.39318	8.30147	6.17381	7.66494	trans
17454250	Mir25	microRNA 25	723926	chr5	-	138.165	138.165	UNC23442164	chr13	115.448	113.236	117.613	7.40685	8.07055	6.19878	7.57545	trans
17454310	Gpc2	glypican 2 (cerebroglycan)	71951	chr5	-	138.274	138.28	UNC11688888	chr6	99.4148	98.7243	100.824	7.49923	8.44834	6.20762	7.56121	trans
17454416	Zfand2a	zinc finger, AN1-type domain 2A	100494	chr5	-	139.472	139.485	UNC2344030	chr1	183.843	182.321	184.393	7.32144	8.31761	6.18973	12.0804	trans
17454428	Micall2	MICAL-like 2	231830	chr5	-	139.707	139.736	UNC28549147	chr17	88.0772	86.1871	89.4959	7.52214	8.35656	6.21516	7.91981	trans
17454546	Mrm2	mitochondrial rRNA methyltransferase 2	68017	chr5	-	140.328	140.331	UNC14133883	chr8	9.64973	7.51228	15.3435	7.56029	8.34342	6.20864	8.05071	trans
17454919	Ccz1	CCZ1 vacuolar protein trafficking and biogenesis associated	231874	chr5	-	143.988	144.015	UNC19722830	chr11	59.0204	56.9701	59.9886	7.39181	8.20367	6.17206	7.8198	trans
17455298	Plut	PDX1 associated lncRNA, upregulator of transcription	70147	chr5	-	147.229	147.271	UNC7951852	chr4	108.838	107.43	114.385	7.63026	8.54442	6.215	9.40828	trans
17455878	Peg10	paternally expressed 10	170676	chr6	+	4.74732	4.75881	JAX00308962	chr11	41.999	39.043	43.9767	7.49641	8.3326	6.16784	7.59159	trans
17236798	Mir3966	microRNA 3966	100628616	chr10	+	97.4235	97.4236	UNC17287038	chr9	122.013	121.381	123.939	7.62067	8.42174	6.2996	9.37165	trans
17456318	Ing3	inhibitor of growth family, member 3	71777	chr6	+	21.9496	21.976	UNC11517152	chr6	84.6304	23.8033	85.4118	7.5151	8.64805	6.26305	7.71234	trans
17456434	Hyal6	hyaluronoglucosaminidase 6	74409	chr6	+	24.7333	24.7452	UNC9087694	chr5	45.5438	37.2254	49.2343	7.45226	8.27322	6.20396	8.97942	trans
17456710	Tspan33	tetraspanin 33	232670	chr6	+	29.6945	29.7184	UNC27463871	chr16	96.3775	92.0245	97.4456	7.64098	8.43813	6.2259	7.89713	trans
17457035	1700012A03Rik	RIKEN cDNA 1700012A03 gene	76382	chr6	+	32.0502	32.0589	UNC5255788	chr3	51.7949	48.0223	55.0275	7.54453	8.48758	6.23278	7.9249	trans
17457310	Chrm2	cholinergic receptor, muscarinic 2, cardiac	243764	chr6	+	36.3882	36.5257	UNC23096116	chr13	92.5766	90.2607	93.9341	7.62777	8.51606	6.23337	7.77943	trans
17457345	Trim24	tripartite motif-containing 24	21848	chr6	+	37.8713	37.9657	UNC6872017	chr4	21.8842	20.0524	22.2388	7.41129	8.30366	6.17115	7.72698	trans
17457661	Trbv1	T cell receptor beta, variable 1	621968	chr6	+	40.8913	40.8919	UNC29417481	chr18	62.7212	60.853	63.3265	7.58319	8.35806	6.18243	7.61185	trans
17457677	Tcrb-J	T cell receptor beta, joining region	21580	chr6	+	41.0594	41.0598	UNC25686600	chr15	59.1982	59.1028	60.2584	7.56607	8.83706	6.17385	53.2142	trans
17457691	Trbv13-2	T cell receptor beta, variable 13-2	100124675	chr6	+	41.1189	41.1193	UNC660238	chr1	51.7453	51.0902	51.8037	7.56631	8.48979	6.20064	11.0118	trans
17457777	Tcrb-J	T cell receptor beta, joining region	21580	chr6	+	41.5343	41.5344	UNC11471943	chr6	81.2324	78.2316	83.5777	7.66742	8.69332	6.29076	8.33828	trans
17457956	2010310C07Rik	RIKEN cDNA 2010310C07 gene	72131	chr6	+	42.3713	42.3803	UNC14496155	chr8	35.6716	34.7754	36.4315	7.76634	8.6572	6.19763	8.47833	trans
17458141	Zfp783	zinc finger protein 783	232785	chr6	+	47.9433	47.954	UNC12573732	chr7	30.5274	29.6883	35.4309	7.56327	8.46682	6.16372	8.79072	trans
17458191	Sspo	SCO-spondin	243369	chr6	+	48.4483	48.5011	UNC11171688	chr6	59.0278	32.4336	65.1078	7.52575	8.32074	6.24154	9.00827	trans
17458362	Gimap4	GTPase, IMAP family member 4	107526	chr6	+	48.6845	48.692	JAX00489906	chr2	54.8596	52.6468	59.3708	7.41688	8.30836	6.19815	7.93345	trans
17458379	Gimap1	GTPase, IMAP family member 1	16205	chr6	+	48.739	48.7435	UNC060124657	chr6	77.1217	71.5459	86.0852	7.56071	8.49753	6.17466	7.63652	trans
17458403	Gm7932	predicted gene 7932	666105	chr6	+	48.8604	48.8653	UNC060481245	chr6	53.4442	47.117	53.5762	7.53693	8.7622	6.21815	9.31565	trans
17458424	Doxl2	diamine oxidase-like protein 2	243376	chr6	+	48.9751	48.9787	UNC23790191	chr14	31.2209	29.7552	31.3026	7.59041	8.35416	6.22954	9.19092	trans
17458759	Znrf2	zinc and ring finger 2	387524	chr6	+	54.8173	54.893	UNC170068236	chr17	29.2782	26.0741	31.2273	7.52453	8.54315	6.19584	8.10871	trans
17458962	Herc6	hect domain and RLD 6	67138	chr6	+	57.581	57.6622	UNC9526264	chr5	78.3132	75.0427	83.6174	7.35197	8.35016	6.13353	7.92965	trans
17458962	Herc6	hect domain and RLD 6	67138	chr6	+	57.581	57.6622	UNC19555854	chr11	46.6973	46.5731	48.834	7.35197	8.35016	6.13353	8.05093	trans
17459005	Vmn1r28	vomeronasal 1 receptor 28	171198	chr6	+	58.2645	58.2666	UNC11646178	chr6	95.9661	94.8034	98.0498	7.49803	8.35776	6.22189	7.70996	trans
17459014	Abcg2	ATP binding cassette subfamily G member 2 (Junior blood group)	26357	chr6	+	58.5967	58.6924	UNC11217267	chr6	62.674	55.0401	64.4318	7.33247	8.22599	6.23335	8.00802	trans
17459696	Gm15401	predicted gene 15401	100038714	chr6	+	72.6293	72.6375	UNC27545171	chr17	9.21022	9.11191	9.52995	7.49301	8.61461	6.20882	8.2228	trans
17237132	Lin7a	lin-7 homolog A (C. elegans)	108030	chr10	+	107.272	107.424	UNC18572135	chr10	101.792	99.5889	108.299	7.38465	8.349	6.22755	8.81533	trans
17237247	Bbs10	Bardet-Biedl syndrome 10 (human)	71769	chr10	+	111.299	111.302	UNC2820696	chr2	30.7486	29.9038	32.5807	7.52765	8.34563	6.21331	7.94671	trans
17237280	Phlda1	pleckstrin homology like domain, family A, member 1	21664	chr10	+	111.506	111.509	UNC1759601	chr1	137.214	136.624	138.735	7.45186	8.19577	6.21485	8.83951	trans
17459888	Aup1	ancient ubiquitous protein 1	11993	chr6	+	83.0548	83.0576	UNC8361248	chr4	140.679	139.5	145.136	7.41883	8.51594	6.21865	7.87269	trans
17459952	Mogs	mannosyl-oligosaccharide glucosidase	57377	chr6	+	83.1155	83.1189	backupUNC090188167	chr9	94.6944	89.5718	95.753	7.5445	8.33993	6.24329	8.14137	trans
17460090	Gm21284	predicted gene, 21284	100861870	chr6	+	83.5681	83.588	UNC25702152	chr15	60.5156	59.1028	61.6167	7.41554	8.22026	6.18928	8.38313	trans
17460545	Bmp10	bone morphogenetic protein 10	12154	chr6	+	87.429	87.4343	UNC6427051	chr3	143.059	141.579	144.066	7.65292	8.51858	6.24945	7.83385	trans
17460558	Efcc1	EF hand and coiled-coil domain containing 1	58229	chr6	+	87.731	87.7557	UNC20888428	chr12	35.5579	33.1407	36.0752	7.47556	8.18538	6.20451	8.05512	trans
17460681	Gm15612	predicted gene 15612	100038356	chr6	+	88.8429	88.8472	UNC23968555	chr14	48.0155	46.9626	48.3809	7.41651	8.42844	6.20111	8.26701	trans
17460714	Gm1965	predicted gene 1965	434065	chr6	+	89.141	89.1473	UNC4421342	chr2	165.691	163.042	165.881	7.418	8.18039	6.169	7.65458	trans
17460933	Lsm3	LSM3 homolog, U6 small nuclear RNA and mRNA degradation associated	67678	chr6	+	91.517	91.5226	UNC30098828	chr19	24.6319	24.0917	25.191	7.59769	8.60204	6.19823	9.48205	trans
17461114	Fam19a1	family with sequence similarity 19, member A1	320265	chr6	+	96.1132	96.6557	UNC3171355	chr2	61.3252	59.6409	63.4477	7.53396	8.45986	6.1809	7.57568	trans
17461132	Mitf	melanogenesis associated transcription factor	17342	chr6	+	97.8071	98.0213	UNC2365651	chr1	185.641	164.111	186.893	7.55636	8.64101	6.1764	7.62463	trans
17461192	Gm34335	predicted gene, 34335	102637557	chr6	+	101.539	101.541	UNC10125455	chr5	127.593	127.413	133.072	8.28333	10.3346	6.37816	9.30188	trans
17461888	Hrh1	histamine receptor H1	15465	chr6	+	114.398	114.483	UNC23244161	chr13	102.636	100.835	107.527	7.37265	8.2151	6.15297	7.48777	trans
17462149	Cxcl12	chemokine (C-X-C motif) ligand 12	20315	chr6	+	117.169	117.179	JAX00022960	chr10	119.575	117.639	120.593	7.45191	8.48835	6.16054	7.93673	trans
17462170	Zfp637	zinc finger protein 637	232337	chr6	+	117.841	117.846	UNC29878754	chr19	10.1056	6.15405	14.7686	7.60259	8.34861	6.20009	8.95696	trans
17462318	Kdm5a	lysine (K)-specific demethylase 5A	214899	chr6	+	120.364	120.439	UNC30054859	chr19	22.0175	11.1016	23.3942	7.42475	8.41977	6.19205	8.43548	trans
17462407	Bcl2l13	BCL2-like 13 (apoptosis facilitator)	94044	chr6	+	120.836	120.891	UNC8663955	chr5	13.6162	12.1157	16.9539	7.52528	8.11834	6.21657	7.58273	trans
17462529	Mug1	murinoglobulin 1	17836	chr6	+	121.84	121.889	UNC3708964	chr2	106.858	106.098	108.129	7.68973	8.44482	6.25283	8.25695	trans
17462663	Mfap5	microfibrillar associated protein 5	50530	chr6	+	122.506	122.529	UNC2421237	chr1	190.145	189.712	191.428	7.63178	8.64387	6.17964	7.66345	trans
17462872	C1ra	complement component 1, r subcomponent A	50909	chr6	+	124.512	124.523	UNC29712927	chr18	81.7972	78.723	82.5308	7.4406	8.35793	6.22173	7.78688	trans
17462893	C1rb	complement component 1, r subcomponent B	667277	chr6	+	124.58	124.581	JAX00127582	chr5	19.4302	19.1651	19.7684	9.40697	11.7246	7.03732	14.8167	trans
17462893	C1rb	complement component 1, r subcomponent B	667277	chr6	+	124.58	124.581	UNC29744745	chr18	83.8834	83.3846	84.0295	9.40697	11.7246	7.03732	9.80459	trans
17463501	Clec2d	C-type lectin domain family 2, member d	93694	chr6	+	129.181	129.186	UNC23966416	chr14	47.8348	46.9575	54.2395	7.38983	8.34545	6.24726	7.84217	trans
17463530	Clec9a	C-type lectin domain family 9, member a	232414	chr6	+	129.409	129.424	UNC12136557	chr6	134.273	128.154	135.086	7.46177	8.64614	6.25119	8.98949	trans
17463650	Smim10l1	small integral membrane protein 10 like 1	381820	chr6	+	133.105	133.107	UNC13743212	chr7	121.126	117.481	122.642	7.35544	8.07368	6.23506	7.48038	trans
17237715	Gns	glucosamine (N-acetyl)-6-sulfatase	75612	chr10	+	121.365	121.397	JAX00112393	chr3	119.786	109.018	126.047	7.4966	8.52766	6.22187	9.18138	trans
17464040	Pde3a	phosphodiesterase 3A, cGMP inhibited	54611	chr6	+	141.249	141.499	JAX00315299	chr11	73.2346	69.1756	78.187	7.55746	8.39861	6.19895	7.89429	trans
17464205	Gm26666	predicted gene, 26666	102634839	chr6	+	145.048	145.05	JAX00454915	chr18	29.2972	25.9185	30.574	7.4391	8.58413	6.1924	9.36732	trans
17464331	Arntl2	aryl hydrocarbon receptor nuclear translocator-like 2	272322	chr6	+	146.803	146.833	UNC22456665	chr13	39.0788	34.3383	39.7836	7.42363	8.22632	6.19199	8.41291	trans
17464424	E330012B07Rik	RIKEN cDNA E330012B07 gene	100039641	chr6	+	147.18	147.208	UNC20635327	chr12	12.0018	10.3759	25.8854	7.55684	8.33412	6.31649	7.70177	trans
17464503	2810474O19Rik	RIKEN cDNA 2810474O19 gene	67246	chr6	+	149.309	149.335	UNC021713399	chr2	177.86	175.178	178.297	7.43164	8.35127	6.17838	11.5304	trans
17464514	Bicd1	BICD cargo adaptor 1	12121	chr6	+	149.409	149.563	JAX00486510	chr2	30.9637	30.2699	33.7014	7.49628	8.35237	6.23028	9.66664	trans
17464977	Wnt2	wingless-type MMTV integration site family, member 2	22413	chr6	-	17.9893	18.0305	UNC10825745	chr6	31.6795	15.9842	32.4336	7.47131	8.23058	6.2161	9.84469	trans
17465115	Cadps2	Ca2+-dependent activator protein for secretion 2	320405	chr6	-	23.2635	23.8393	UNC21996819	chr12	117.674	117.577	120.017	7.44946	8.53104	6.21733	8.9909	trans
17465373	Impdh1	inosine monophosphate dehydrogenase 1	23917	chr6	-	29.2008	29.2163	UNC14026572	chr7	142.827	142.443	143.428	7.2919	8.14579	6.21275	7.47812	trans
17465512	Tmem209	transmembrane protein 209	72649	chr6	-	30.4792	30.5098	UNC10755037	chr6	25.6864	24.7466	31.4635	7.51568	8.76492	6.19723	13.5724	trans
17465696	Slc35b4	solute carrier family 35, member B4	58246	chr6	-	34.1545	34.1771	UNC4600878	chr2	180.904	179.369	181.834	7.53876	8.25201	6.20187	7.6454	trans
17465750	Wdr91	WD repeat domain 91	101240	chr6	-	34.8805	34.9109	UNC31060536	chrX	87.3278	84.8881	94.9953	7.56122	8.43132	6.14972	8.84129	trans
17465824	Fam180a	family with sequence similarity 180, member A	208164	chr6	-	35.3129	35.3261	JAX00653582	chr7	121.277	120.097	122.467	7.5283	8.49683	6.24147	7.90181	trans
17466142	Dennd2a	DENN/MADD domain containing 2A	209773	chr6	-	39.4625	39.5276	UNC19408618	chr11	35.7389	33.6985	35.8739	7.49629	8.47366	6.17783	7.73565	trans
17237887	Cyp27b1	cytochrome P450, family 27, subfamily b, polypeptide 1	13115	chr10	+	127.048	127.053	UNC28222130	chr17	67.0635	66.4281	67.731	7.58379	8.53063	6.22064	8.19029	trans
17466382	Olfr459	olfactory receptor 459	258569	chr6	-	41.7713	41.7723	UNC5258063	chr3	51.9398	51.0682	52.4531	7.54326	8.3938	6.24173	7.8066	trans
17466397	Epha1	Eph receptor A1	13835	chr6	-	42.3585	42.3722	UNC17537118	chr10	19.8506	10.5581	20.125	7.47123	8.15294	6.18124	8.12224	trans
17466421	Olfr456	olfactory receptor 456	259144	chr6	-	42.4862	42.4872	UNC26326969	chr16	10.2702	7.18124	12.153	7.44679	8.20973	6.26073	8.17218	trans
17466624	Tmem176b	transmembrane protein 176B	65963	chr6	-	48.8339	48.8412	UNC3473917	chr2	86.7703	75.6033	91.6018	7.45193	8.3625	6.13764	7.54132	trans
17466833	Hoxa5	homeobox A5	15402	chr6	-	52.2019	52.2046	UNC26723692	chr16	44.1436	41.313	44.7543	7.36556	8.41704	6.22544	7.915	trans
17466996	Fkbp14	FK506 binding protein 14	231997	chr6	-	54.5789	54.5973	UNC20789075	chr12	28.3932	27.4522	28.5821	7.50827	8.2232	6.19297	7.91458	trans
17467166	Pyurf	Pigy upstream reading frame	66459	chr6	-	57.6858	57.6921	UNC12625919	chr7	36.1164	30.4918	37.1338	7.48412	8.21384	6.18947	7.49322	trans
17467205	Nap1l5	nucleosome assembly protein 1-like 5	58243	chr6	-	58.9056	58.9071	JAX00350055	chr13	10.9854	4.55045	17.869	7.57975	8.55762	6.28434	7.58927	trans
17467260	A730020E08Rik	RIKEN cDNA A730020E08 gene	100504262	chr6	-	61.1759	61.1808	JAX00405115	chr15	71.83	66.9033	71.9298	7.51843	8.81859	6.14233	9.5294	trans
17467269	Hpgds	hematopoietic prostaglandin D synthase	54486	chr6	-	65.1174	65.1449	UNC2353149	chr1	184.724	176.631	186.055	7.46611	8.15657	6.21521	7.82874	trans
17238091	1700012D01Rik	RIKEN cDNA 1700012D01 gene	72243	chr10	+	127.667	127.669	UNC12376566	chr7	4.24046	3.13043	6.74405	7.45039	8.2698	6.22193	8.39882	trans
17467742	Vamp5	vesicle-associated membrane protein 5	53620	chr6	-	72.3684	72.3703	UNC28196316	chr17	65.3966	65.149	65.966	7.51161	8.50732	6.17823	8.588	trans
17468043	2310069B03Rik	RIKEN cDNA 2310069B03 gene	69652	chr6	-	82.8781	82.8818	UNC2724327	chr2	22.7784	20.6034	23.1735	7.46602	8.20782	6.21059	7.63237	trans
17468172	Dguok	deoxyguanosine kinase	27369	chr6	-	83.4803	83.507	UNC21486268	chr12	81.1693	78.7688	83.4597	7.57184	8.42521	6.27915	7.57384	trans
17468183	Actg2	actin, gamma 2, smooth muscle, enteric	11468	chr6	-	83.513	83.5362	UNC14907567	chr8	65.1692	63.5029	66.9739	7.59254	8.08399	6.22396	7.94563	trans
17468183	Actg2	actin, gamma 2, smooth muscle, enteric	11468	chr6	-	83.513	83.5362	UNC22220134	chr13	19.772	16.8702	20.1417	7.59254	8.08399	6.22396	8.77063	trans
17468195	Stambp	STAM binding protein	70527	chr6	-	83.5437	83.5725	UNC22847800	chr13	72.8153	71.5691	73.4143	7.57416	8.48831	6.21056	9.25768	trans
17468438	Nat8	N-acetyltransferase 8 (GCN5-related)	68396	chr6	-	85.8304	85.8321	UNC28751141	chr18	12.7719	11.8842	15.0332	7.57046	8.51093	6.17882	8.2795	trans
17468450	Nat8f4	N-acetyltransferase 8 (GCN5-related) family member 4	75541	chr6	-	85.8995	85.9049	UNC_rs29214434	chr12	25.1427	17.7439	25.3834	7.54231	8.49608	6.20357	12.4292	trans
17468511	Mxd1	MAX dimerization protein 1	17119	chr6	-	86.6482	86.6692	UNC21817943	chr12	105.981	105.421	108.304	7.63085	8.52429	6.16018	7.90174	trans
17468520	Snrnp27	small nuclear ribonucleoprotein 27 (U4/U6.U5)	66618	chr6	-	86.6753	86.6845	UNC19270044	chr11	25.0813	20.9356	26.1096	7.36614	8.15045	6.2044	8.35291	trans
17468705	Rab7	RAB7, member RAS oncogene family	19349	chr6	-	87.9992	88.0453	UNC28526925	chr17	86.5061	86.1871	87.8208	7.60448	8.61867	6.20152	8.00379	trans
17468879	Vmn1r43	vomeronasal 1 receptor 43	113847	chr6	-	89.8695	89.8699	UNC26162515	chr15	95.5946	94.5652	96.1811	7.42408	8.44991	6.21678	7.96045	trans
17468891	Vmn1r53	vomeronasal 1 receptor 53	113853	chr6	-	90.2233	90.2244	UNC4561486	chr2	178.095	174.61	179.253	7.42214	8.12651	6.18109	8.48658	trans
17469249	AY512915	cDNA sequence AY512915	414067	chr6	-	95.2557	95.334	UNC13807690	chr7	126.937	124.131	129.508	7.4977	8.33981	6.22111	8.26534	trans
17238245	Baz2a	bromodomain adjacent to zinc finger domain, 2A	116848	chr10	+	128.092	128.128	UNC21039766	chr12	46.3727	42.4683	46.6282	7.40397	8.33134	6.12143	8.08813	trans
17469864	Tamm41	TAM41 mitochondrial translocator assembly and maintenance homolog	68971	chr6	-	115.004	115.038	UNC11807453	chr6	108.147	105.983	115.378	7.54787	8.44029	6.18484	8.84426	trans
17469887	Mkrn2os	makorin, ring finger protein 2, opposite strand	70291	chr6	-	115.584	115.593	UNC29102107	chr18	40.7258	38.9349	41.7165	7.50018	8.35644	6.20797	8.42249	trans
17470088	1700030F04Rik	RIKEN cDNA 1700030F04 gene	72263	chr6	-	117.679	117.703	JAX00594847	chr5	121.373	120.256	122.428	7.44273	8.60179	6.19632	8.98844	trans
17470394	B4galnt3	beta-1,4-N-acetyl-galactosaminyl transferase 3	330406	chr6	-	120.203	120.295	UNC090324910	chr9	52.1707	51.758	53.9107	7.41939	8.35218	6.20083	7.49503	trans
17470457	Bid	BH3 interacting domain death agonist	12122	chr6	-	120.893	120.917	UNC18123321	chr10	65.7683	62.8058	67.3963	7.4406	8.25479	6.17741	7.75188	trans
17470468	Mical3	microtubule associated monooxygenase, calponin and LIM domain containing 3	194401	chr6	-	120.932	121.081	JAX00599077	chr5	138.733	138.117	139.837	7.37936	8.28299	6.20536	10.6593	trans
17470779	Emg1	EMG1 N1-specific pseudouridine methyltransferase	14791	chr6	-	124.704	124.712	UNC24193650	chr14	69.7282	67.9174	70.5405	7.48239	8.55892	6.14053	8.98758	trans
17470796	Ptpn6	protein tyrosine phosphatase, non-receptor type 6	15170	chr6	-	124.721	124.739	JAX00409463	chr15	91.0663	90.5	92.0589	7.59143	8.51303	6.25595	8.29411	trans
17470879	Tpi1	triosephosphate isomerase 1	21991	chr6	-	124.811	124.814	UNC19431017	chr11	37.4693	36.0185	40.8373	7.36692	8.30498	6.18503	7.45289	trans
17470930	P3h3	prolyl 3-hydroxylase 3	14789	chr6	-	124.842	124.858	UNC13776617	chr7	124.161	123.959	125.31	7.47837	8.35606	6.20061	8.58146	trans
17470994	Cops7a	COP9 signalosome subunit 7A	26894	chr6	-	124.959	124.966	UNC7330906	chr4	58.3226	55.6035	59.3706	7.47537	8.18367	6.18221	8.07305	trans
17471324	Itfg2	integrin alpha FG-GAP repeat containing 2	101142	chr6	-	128.409	128.425	UNC25052848	chr15	12.4945	3.50623	13.133	7.39573	8.37472	6.19453	7.81911	trans
17471440	Clec2j	C-type lectin domain family 2, member J	677440	chr6	-	128.652	128.657	UNC21854347	chr12	108.329	108.301	110.737	7.58866	8.9314	6.21286	8.85193	trans
17471881	Tas2r130	taste receptor, type 2, member 130	387355	chr6	-	131.63	131.631	UNC29071221	chr18	38.3531	35.3694	40.9575	7.53875	8.38109	6.24115	8.03851	trans
17238535	Pmel	premelanosome protein	20431	chr10	+	128.706	128.72	UNC30612732	chrX	6.52623	5.45483	13.5181	7.53773	8.14808	6.21982	7.8251	trans
17238605	Itga7	integrin alpha 7	16404	chr10	+	128.934	128.958	UNC8512717	chr4	154.436	154	155.146	7.56044	8.40682	6.21613	7.74866	trans
17238648	Olfr775	olfactory receptor 775	258538	chr10	+	129.251	129.251	UNC5200097	chr3	48.0223	38.8926	51.7383	7.74046	8.63228	6.29178	7.91881	trans
17471970	Tas2r140	taste receptor, type 2, member 140	387616	chr6	-	133.055	133.056	JAX00522588	chr3	51.0239	48.9564	54.6446	7.49533	8.40403	6.22943	8.23969	trans
17471980	Kap	kidney androgen regulated protein	16483	chr6	-	133.85	133.854	UNC26232035	chr15	101.92	101.309	103.654	7.49803	8.19503	6.23845	7.51008	trans
17472210	Arhgdib	Rho, GDP dissociation inhibitor (GDI) beta	11857	chr6	-	136.924	136.942	JAX00409463	chr15	91.0663	90.1887	92.4332	7.67951	8.53744	6.20965	7.89923	trans
17472235	Eps8	epidermal growth factor receptor pathway substrate 8	13860	chr6	-	137.479	137.655	UNC23360955	chr13	110.608	110.408	111.32	7.6611	8.38169	6.21661	7.78877	trans
17472990	Ipo8	importin 8	320727	chr6	-	148.775	148.831	UNC12209527	chr6	138.67	136.686	139.152	7.59764	8.639	6.23429	7.7941	trans
17473554	Galp	galanin-like peptide	232836	chr7	+	6.19711	6.21607	UNC26151263	chr15	94.7655	93.6888	94.8926	7.5719	8.54575	6.21699	8.30866	trans
17473561	Zscan5b	zinc finger and SCAN domain containing 5B	170734	chr7	+	6.2223	6.23937	UNC5302729	chr3	54.9137	52.8218	56.4934	7.52454	8.0764	6.19506	8.73375	trans
17473595	Zfp78	zinc finger protein 78	330463	chr7	+	6.36332	6.38246	JAX00149774	chr7	30.1539	29.5483	30.4738	7.51906	8.16247	6.23714	8.52581	trans
17474593	Ercc2	excision repair cross-complementing rodent repair deficiency, complementation group 2	13871	chr7	+	19.3823	19.3949	JAX00197267	chr11	7.49447	6.21247	9.20495	7.48626	8.6919	6.24047	7.89664	trans
17474647	Trappc6a	trafficking protein particle complex 6A	67091	chr7	+	19.5088	19.5161	UNC12538401	chr7	27.8571	15.9107	28.1013	7.46548	8.53518	6.23503	10.1433	trans
17474663	Zfp296	zinc finger protein 296	63872	chr7	+	19.5773	19.5806	UNC12531236	chr7	27.3192	26.2447	27.6769	7.61264	8.49951	6.19971	12.7139	trans
17474880	Zfp180	zinc finger protein 180	210135	chr7	+	24.0821	24.1075	UNC12488508	chr7	19.9459	19.6112	24.9083	7.54046	8.48872	6.18785	27.0925	trans
17475251	Megf8	multiple EGF-like-domains 8	269878	chr7	+	25.3172	25.3657	UNC10024895	chr5	119.654	118.825	121.158	7.45892	8.27904	6.23225	10.9459	trans
17475839	Gmfg	glia maturation factor, gamma	63986	chr7	+	28.4374	28.4481	UNC6084809	chr3	120.255	119.627	121.002	7.42837	8.32774	6.18134	9.09876	trans
17476497	Atp4a	ATPase, H+/K+ exchanging, gastric, alpha polypeptide	11944	chr7	+	30.7124	30.7253	UNC12610465	chr7	35.153	30.424	35.2328	7.56272	8.702	6.26653	17.1775	trans
17476924	4930433I11Rik	RIKEN cDNA 4930433I11 gene	243944	chr7	+	40.9935	40.9949	UNC14013599	chr7	141.562	140.25	141.621	7.53406	8.48236	6.28726	22.9678	trans
17477292	Klk1b8	kallikrein 1-related peptidase b8	16624	chr7	+	43.9528	43.9548	UNC20621151	chr12	10.8748	6.83367	16.8905	7.61577	8.56215	6.29715	7.63873	trans
17477322	Klk1b26	kallikrein 1-related petidase b26	16618	chr7	+	44.016	44.0168	backupUNC031465999	chr3	126.966	123.174	128.154	7.43362	8.21911	6.2279	8.17107	trans
17477331	Klk1b27	kallikrein 1-related peptidase b27	16619	chr7	+	44.0566	44.0566	UNC9815520	chr5	102.933	100.545	105.639	7.64342	8.59356	6.21431	8.10829	trans
17238856	Syne1	spectrin repeat containing, nuclear envelope 1	64009	chr10	-	5.23457	5.23469	UNC17444797	chr10	13.0089	5.69466	14.893	7.50751	8.35495	6.20287	7.67408	trans
17238870	Syne1	spectrin repeat containing, nuclear envelope 1	64009	chr10	-	5.24961	5.24976	UNC030083355	chr3	64.7759	61.3035	81.6392	7.43126	8.2867	6.2197	8.09952	trans
17238876	Syne1	spectrin repeat containing, nuclear envelope 1	64009	chr10	-	5.2568	5.25691	JAX00026854	chr11	44.5778	42.7494	44.6684	7.4278	8.15496	6.19184	8.42714	trans
17238878	Syne1	spectrin repeat containing, nuclear envelope 1	64009	chr10	-	5.25925	5.25939	JAX00204553	chr14	28.9361	27.366	33.1612	7.51074	8.72962	6.16828	7.66341	trans
17477540	Vrk3	vaccinia related kinase 3	101568	chr7	+	44.7485	44.7773	UNC1219303	chr1	98.4661	93.5674	99.4885	7.4511	8.33954	6.2196	7.50103	trans
17477540	Vrk3	vaccinia related kinase 3	101568	chr7	+	44.7485	44.7773	UNC10832076	chr6	32.2076	27.8838	32.5393	7.4511	8.33954	6.2196	7.74303	trans
17477597	Pnkp	polynucleotide kinase 3'- phosphatase	59047	chr7	+	44.8571	44.8628	UNC12784582	chr7	48.8721	42.2954	66.9841	7.56314	8.21933	6.22543	9.07688	trans
17477766	Slc6a21	solute carrier family 6 member 21	76713	chr7	+	45.2829	45.2889	UNC30116751	chr19	25.6193	25.5734	27.3865	7.58745	8.59633	6.19334	8.23821	trans
17478587	A230056P14Rik	RIKEN cDNA A230056P14 gene	320845	chr7	+	55.9626	55.9807	UNC200217527	chrX	102.67	101.364	111.085	7.48844	8.32941	6.17592	7.55337	trans
17478793	Magel2	melanoma antigen, family L, 2	27385	chr7	+	62.377	62.3816	UNC3845736	chr2	119.869	105.657	126.422	7.43134	8.47756	6.19772	7.90546	trans
17478883	Mcee	methylmalonyl CoA epimerase	73724	chr7	+	64.3927	64.4121	UNC12902291	chr7	56.2348	53.7942	66.9841	7.52601	8.85633	6.30075	9.13633	trans
17479162	Kansl2	KAT8 regulatory NSL complex subunit 2	69612	chr7	+	72.6735	72.6735	UNC9940714	chr5	113.403	111.439	114.323	7.36027	8.20285	6.1898	7.8524	trans
17479162	Kansl2	KAT8 regulatory NSL complex subunit 2	69612	chr7	+	72.6735	72.6735	UNC26200317	chr15	98.5447	97.62	98.6264	7.36027	8.20285	6.1898	9.52329	trans
17479303	Aen	apoptosis enhancing nuclease	68048	chr7	+	78.8959	78.9108	UNC13265433	chr7	84.0672	78.2447	87.255	7.58398	8.54159	6.24956	9.44698	trans
17479423	Mir9-3	microRNA 9-3	723968	chr7	+	79.5053	79.5053	UNC11018236	chr6	47.0281	46.9978	48.215	7.48492	8.27562	6.18787	9.59918	trans
17238882	Syne1	spectrin repeat containing, nuclear envelope 1	64009	chr10	-	5.26266	5.26281	UNC17443109	chr10	12.9169	7.13543	19.8506	7.54236	8.45627	6.20287	10.2442	trans
17238896	Syne1	spectrin repeat containing, nuclear envelope 1	64009	chr10	-	5.29308	5.29322	UNC15660952	chr8	122.356	120.549	122.498	7.57454	8.40238	6.20595	7.66898	trans
17480074	E230029C05Rik	RIKEN cDNA E230029C05 gene	319711	chr7	+	90.0292	90.0402	JAX00645754	chr7	84.5852	81.468	91.6554	7.42869	8.25135	6.18564	8.19189	trans
17480102	Sytl2	synaptotagmin-like 2	83671	chr7	+	90.3487	90.4099	UNC13997515	chr7	140.171	139.068	140.183	8.45031	10.8109	6.49049	9.02895	trans
17480233	Fam181b	family with sequence similarity 181, member B	58238	chr7	+	93.0799	93.0816	UNC21772871	chr12	102.74	102.503	104.257	7.56912	8.51225	6.22707	8.13865	trans
17480829	Arap1	ArfGAP with RhoGAP domain, ankyrin repeat and PH domain 1	69710	chr7	+	101.348	101.412	UNC13304460	chr7	86.9007	84.0396	87.255	7.46898	8.22204	6.20064	7.58401	trans
17480924	LOC102638993	uncharacterized LOC102638993	102638993	chr7	+	101.55	101.558	UNC2029189	chr1	158.066	156.498	159.233	7.45167	8.51533	6.16082	8.48014	trans
17481087	Stim1	stromal interaction molecule 1	20866	chr7	+	102.268	102.436	UNC9467997	chr5	74.1864	73.9041	75.9437	7.50061	8.48689	6.18482	8.17733	trans
17481129	Olfr550	olfactory receptor 550	259108	chr7	+	102.579	102.579	UNC24141257	chr14	65.8727	64.031	66.2727	7.56762	8.5087	6.28096	8.06891	trans
17481144	Olfr558	olfactory receptor 558	259097	chr7	+	102.702	102.712	UNC29055440	chr18	37.0826	34.0055	38.6531	7.4282	8.25795	6.20665	7.51088	trans
17481167	Olfr582	olfactory receptor 582	259055	chr7	+	103.042	103.042	UNC090261455	chr9	123.97	123.003	124.153	7.7371	8.57463	6.24178	9.04388	trans
17481207	Olfr608	olfactory receptor 608	258751	chr7	+	103.47	103.471	UNC30553730	chr19	56.7531	55.1442	57.549	7.58292	8.49162	6.24118	7.6928	trans
17481274	Trim34a	tripartite motif-containing 34A	94094	chr7	+	104.262	104.262	UNC11979850	chr6	121.166	119.51	122.581	7.35474	8.0387	6.14347	8.92819	trans
17481297	Gm15133	predicted gene 15133	622070	chr7	+	104.315	104.325	JAX00547895	chr4	32.5117	25.0668	33.9179	7.52729	8.52687	6.22955	7.91802	trans
17481477	Gm15645	predicted gene 15645	626055	chr7	+	105.762	105.864	UNC13400199	chr7	94.4449	90.7116	96.7824	7.59561	8.52562	6.2051	9.17955	trans
17481606	Olfr481	olfactory receptor 481	258927	chr7	+	108.081	108.082	backupUNC021453120	chr2	132.22	128.027	132.821	7.50612	8.51813	6.25179	8.23612	trans
17481624	Olfr506	olfactory receptor 506	258215	chr7	+	108.612	108.613	UNC5545015	chr3	74.9714	72.9798	143.634	7.75198	8.73222	6.2869	7.97313	trans
17239077	Ginm1	glycoprotein integral membrane 1	215751	chr10	-	7.768	7.79273	UNC29552090	chr18	71.2424	69.9437	71.9758	7.4274	8.31027	6.25272	8.35631	trans
17481770	Adm	adrenomedullin	11535	chr7	+	110.628	110.63	JAX00112667	chr3	123.443	122.536	127.253	7.44359	8.4469	6.17091	8.00272	trans
17481831	Usp47	ubiquitin specific peptidase 47	74996	chr7	+	112.024	112.111	UNC20525126	chr11	120.373	118.534	121.208	7.3832	8.3243	6.20092	8.11319	trans
17483165	Hirip3	HIRA interacting protein 3	233876	chr7	+	126.862	126.865	UNC19831142	chr11	66.8899	62.8972	69.879	7.53605	8.27179	6.16881	7.61228	trans
17484409	Adgra1	adhesion G protein-coupled receptor A1	52389	chr7	+	139.834	139.877	UNC1637133	chr1	127.583	127.044	163.245	7.41714	8.25077	6.2102	7.47653	trans
17239184	Adgb	androglobin	215772	chr10	-	10.3359	10.4723	UNC23930285	chr14	41.2309	36.4032	45.6096	7.49251	8.31679	6.16246	7.49837	trans
17484615	Odf3	outer dense fiber of sperm tails 3	69287	chr7	+	140.848	140.851	UNC100020956	chr10	15.2924	13.4896	18.8537	7.60989	8.25402	6.23585	8.32387	trans
17484701	Ifitm1	interferon induced transmembrane protein 1	68713	chr7	+	140.967	140.97	UNC1221473	chr1	98.6578	90.5034	107.288	7.55717	8.55903	6.24201	8.37077	trans
17484789	Rassf7	Ras association (RalGDS/AF-6) domain family (N-terminal) member 7	66985	chr7	+	141.216	141.219	UNC29311166	chr18	55.8851	55.4517	61.296	7.66522	8.54265	6.22387	7.96768	trans
17484907	Snora52	small nucleolar RNA, H/ACA box 52	100217419	chr7	+	141.449	141.449	UNC20492499	chr11	117.732	117.524	118.493	7.45254	8.17746	6.19038	8.68545	trans
17485376	LOC102636989	actin-like	102636989	chr7	+	143.867	143.897	UNC20475852	chr11	116.595	115.527	116.707	7.54705	8.59203	6.21642	7.75521	trans
17485880	Hspbp1	HSPA (heat shock 70kDa) binding protein, cytoplasmic cochaperone 1	66245	chr7	-	4.66054	4.68496	UNC180279562	chr18	56.5657	55.8095	57.0656	7.45336	8.18469	6.16978	7.69728	trans
17485952	Isoc2b	isochorismatase domain containing 2b	67441	chr7	-	4.84497	4.86618	UNC30337081	chr19	42.0741	40.4216	42.5695	7.5848	8.75672	6.27842	7.6005	trans
17485985	Fiz1	Flt3 interacting zinc finger protein 1	23877	chr7	-	5.0073	5.01465	backupUNC071736088	chr7	13.9795	4.10034	16.3058	7.47976	8.4786	6.21099	9.74528	trans
17486015	Vmn1r55	vomeronasal 1 receptor 55	384522	chr7	-	5.14629	5.14698	JAX00067601	chr16	26.5038	25.1785	28.079	7.64597	8.63374	6.2544	8.11209	trans
17486173	Clcn4	chloride channel, voltage-sensitive 4	12727	chr7	-	7.283	7.29931	UNC12416196	chr7	11.9303	6.75378	13.5748	7.43835	8.43569	6.20664	24.1848	trans
17486270	Vmn2r42	vomeronasal 2, receptor 42	22310	chr7	-	8.1852	8.18564	UNC12432782	chr7	13.5748	11.7338	24.6736	7.64531	8.43109	6.27961	11.1216	trans
17486589	Slc27a5	solute carrier family 27 (fatty acid transporter), member 5	26459	chr7	-	12.9884	12.9982	UNC12401028	chr7	6.76647	6.20692	18.2583	7.51738	8.37465	6.27699	11.5932	trans
17486611	Chmp2a	charged multivesicular body protein 2A	68953	chr7	-	13.032	13.0348	UNC12402262	chr7	6.90368	4.40584	25.4712	7.55926	8.73162	6.22221	12.2729	trans
17486635	Mzf1	myeloid zinc finger 1	109889	chr7	-	13.0428	13.0547	UNC12402170	chr7	6.88452	4.24046	16.3058	7.40749	8.59464	6.21029	7.84848	trans
17486683	Sult2a3	sulfotransferase family 2A, dehydroepiandrosterone (DHEA)-preferring, member 3	629203	chr7	-	14.1217	14.123	JAX00707467	chr9	119.11	115.992	119.36	7.48051	8.26436	6.16627	8.11397	trans
17486781	Selenow	selenoprotein W	20364	chr7	-	15.9172	15.9224	UNC20026903	chr11	83.7185	82.0873	85.8804	7.59786	8.59043	6.22612	8.56427	trans
17486859	C5ar2	complement component 5a receptor 2	319430	chr7	-	16.2353	16.2441	UNC21265797	chr12	63.8551	58.8429	70.2747	7.39804	8.40485	6.16642	10.0982	trans
17487272	Bloc1s3	biogenesis of lysosomal organelles complex-1, subunit 3	232946	chr7	-	19.506	19.5075	UNC12506427	chr7	24.7104	19.3489	24.8274	7.4977	8.50106	6.17123	11.2688	trans
17487395	Tomm40	translocase of outer mitochondrial membrane 40 homolog (yeast)	53333	chr7	-	19.7015	19.7151	UNC13085275	chr7	70.8061	70.0984	73.0206	7.61493	8.2985	6.1599	8.22527	trans
17487422	Bcam	basal cell adhesion molecule	57278	chr7	-	19.7562	19.771	UNC13639573	chr7	112.965	109.834	113.709	7.35733	8.19005	6.1822	7.51734	trans
17487789	Gm4881	predicted gene 4881	232974	chr7	-	24.9275	24.9552	UNC17177359	chr9	114.824	114.578	115.164	7.429	8.366	6.24237	10.4763	trans
17487927	Lipe	lipase, hormone sensitive	16890	chr7	-	25.3799	25.3987	UNC8370144	chr4	141.252	140.25	142.077	7.39519	8.31294	6.16252	7.8498	trans
17239682	4930455C13Rik	RIKEN cDNA 4930455C13 gene	73990	chr10	-	21.3191	21.342	UNC7913411	chr4	105.964	103.682	114.302	7.48212	8.32682	6.14814	7.5027	trans
17488179	Ltbp4	latent transforming growth factor beta binding protein 4	108075	chr7	-	27.3053	27.3376	UNC030674885	chr3	98.3568	98.0389	141.781	7.48105	8.35316	6.16965	8.24181	trans
17489229	Etv2	ets variant 2	14008	chr7	-	30.6337	30.6362	UNC13756329	chr7	122.348	121.678	123.543	7.32729	8.0673	6.16615	8.1256	trans
17489229	Etv2	ets variant 2	14008	chr7	-	30.6337	30.6362	UNC30366966	chr19	44.1822	42.0741	44.6421	7.32729	8.0673	6.16615	7.6525	trans
17489768	Tdrd12	tudor domain containing 12	71981	chr7	-	35.4691	35.5377	UNC17394028	chr10	9.19925	7.13543	11.5982	7.42972	8.28194	6.23896	7.4504	trans
17489824	Dpy19l3	dpy-19-like 3 (C. elegans)	233115	chr7	-	35.6852	35.7544	UNC25488460	chr15	45.2026	43.87	47.8388	7.37863	7.94196	6.14583	11.0614	trans
17489847	Zfp507	zinc finger protein 507	668501	chr7	-	35.7732	35.803	JAX00636793	chr7	40.7706	37.7477	45.5757	7.51199	8.32712	6.1706	8.02709	trans
17489928	Gm5591	predicted gene 5591	434171	chr7	-	38.5183	38.5282	UNC10994961	chr6	45.3534	41.1253	47.0281	7.61909	8.59282	6.22577	7.6775	trans
17490187	1700028J19Rik	RIKEN cDNA 1700028J19 gene	70004	chr7	-	44.2301	44.2361	JAX00146327	chr6	124.329	123.026	125.382	7.53467	8.32087	6.2361	9.30641	trans
17490628	Flt3l	FMS-like tyrosine kinase 3 ligand	14256	chr7	-	45.1313	45.1364	UNC12680357	chr7	40.5686	27.9165	55.3558	7.51245	8.2567	6.21334	7.89521	trans
17490791	Snrnp70	small nuclear ribonucleoprotein 70 (U1)	20637	chr7	-	45.3766	45.3956	UNC12864758	chr7	53.8518	48.8721	55.2073	7.52851	8.42491	6.18291	8.13451	trans
17491340	Mrgpra4	MAS-related GPR, member A4	235854	chr7	-	47.9808	47.9822	UNC15056408	chr8	78.2649	67.7835	79.6405	7.52828	8.55915	6.22745	7.57105	trans
17491378	E2f8	E2F transcription factor 8	108961	chr7	-	48.8666	48.8815	UNC2606329	chr2	13.6874	12.2592	13.8368	7.44843	8.39912	6.19595	8.42673	trans
17491417	Fancf	Fanconi anemia, complementation group F	100040608	chr7	-	51.8606	51.8622	UNC24230678	chr14	72.8438	70.6151	74.8714	7.43445	8.2877	6.19448	8.43495	trans
17491777	4930554H23Rik	RIKEN cDNA 4930554H23 gene	77631	chr7	-	63.345	63.4443	UNC28325241	chr17	73.3214	49.4393	74.6395	7.40142	8.29825	6.20745	7.76218	trans
17491816	Mphosph10	M-phase phosphoprotein 10 (U3 small nucleolar ribonucleoprotein)	67973	chr7	-	64.3766	64.3923	UNC28797279	chr18	16.6309	15.8314	21.0312	7.33178	7.92794	6.14375	7.77964	trans
17214027	D230017M19Rik	RIKEN cDNA D230017M19 gene	320933	chr1	+	72.2365	72.2743	UNC968582	chr1	76.4671	74.4292	77.7289	7.4586	8.18479	6.23143	9.11479	trans
17240043	Gm20300	predicted gene, 20300	100504586	chr10	-	30.6032	30.6057	UNC20403886	chr11	112.123	112.114	113.045	7.44618	8.20371	6.19664	7.49544	trans
17240137	Sult3a2	sulfotransferase family 3A, member 2	215895	chr10	-	33.7682	33.7821	UNC17313322	chr9	124.153	123.855	124.153	7.37924	8.169	6.16149	11.5603	trans
17492078	Mctp2	multiple C2 domains, transmembrane 2	244049	chr7	-	72.0785	72.3065	UNC29232217	chr18	49.9627	47.5498	81.2335	7.48411	8.40667	6.20078	7.51027	trans
17492173	Gm4971	Smad nuclear interacting protein 1 pseudogene	244061	chr7	-	73.6856	73.6866	UNC18804031	chr10	117.298	116.1	118.402	7.48358	8.50526	6.16979	7.66493	trans
17492575	Fes	feline sarcoma oncogene	14159	chr7	-	80.3778	80.3879	UNC30137555	chr19	27.0414	26.8389	27.3865	7.48086	8.26375	6.17072	7.63032	trans
17492644	Crtc3	CREB regulated transcription coactivator 3	70461	chr7	-	80.5867	80.6887	UNC30427919	chr19	48.4977	48.3913	48.6227	7.50888	8.07911	6.23517	9.06298	trans
17492754	Cpeb1	cytoplasmic polyadenylation element binding protein 1	12877	chr7	-	81.3472	81.4554	UNC30109066	chr19	25.191	23.3783	40.6609	7.52064	8.47642	6.16031	7.54627	trans
17492838	3110040N11Rik	RIKEN cDNA 3110040N11 gene	67290	chr7	-	81.7824	81.7894	UNC13304460	chr7	86.9007	81.7621	91.8767	7.53044	8.40836	6.27365	9.67991	trans
17493906	Art2a-ps	ADP-ribosyltransferase 2a, pseudogene	11871	chr7	-	101.553	101.561	UNC13551890	chr7	105.706	96.7824	113.052	7.63937	8.674	6.28892	8.28389	trans
17494005	Rnf121	ring finger protein 121	75212	chr7	-	102.019	102.065	UNC23389194	chr13	112.217	109.336	112.513	7.52885	8.10135	6.20609	8.07056	trans
17494033	Chrna10	cholinergic receptor, nicotinic, alpha polypeptide 10	504186	chr7	-	102.111	102.116	UNC12518676	chr7	25.9011	25.5779	26.3088	7.35184	8.23237	6.21192	7.49694	trans
17240250	Wisp3	WNT1 inducible signaling pathway protein 3	327743	chr10	-	39.151	39.1638	UNC26442409	chr16	20.7892	18.4508	21.8464	7.58259	8.61983	6.16144	10.2371	trans
17240258	Gm16364	predicted gene 16364	100504626	chr10	-	39.5561	39.5581	JAX00284112	chr10	18.8963	15.5877	20.1837	7.46867	8.43374	6.2023	7.60947	trans
17240261	Gm16364	predicted gene 16364	100504626	chr10	-	39.5586	39.6136	UNC20778368	chr12	27.61	26.6905	28.415	7.42343	8.52374	6.24672	7.44924	trans
17494189	Olfr622	olfactory receptor 622	259087	chr7	-	103.639	103.64	UNC23802871	chr14	32.2082	31.2209	33.2713	7.67002	8.82486	6.24575	11.2662	trans
17494277	Olfr643	olfactory receptor 643	259081	chr7	-	104.059	104.06	UNC27384316	chr16	91.014	89.8505	91.106	7.61807	8.70279	6.26436	8.40171	trans
17494298	Ubqln3	ubiquilin 3	244178	chr7	-	104.141	104.143	UNC14247821	chr8	16.8922	14.9186	18.5022	7.44956	8.55744	6.28606	7.55563	trans
17494370	Trim30b	tripartite motif-containing 30B	244183	chr7	-	104.356	104.366	UNC13456165	chr7	98.6098	92.5582	112.884	7.51164	8.5977	6.19022	11.0543	trans
17494370	Trim30b	tripartite motif-containing 30B	244183	chr7	-	104.356	104.366	UNC30557511	chr19	57.0044	55.509	57.3686	7.51164	8.5977	6.19022	7.66073	trans
17494394	Trim30a	tripartite motif-containing 30A	20128	chr7	-	104.41	104.436	backupJAX00012065	chr1	164.815	155.654	165.676	7.40558	8.35867	6.19831	8.04143	trans
17494473	Olfr686	olfactory receptor 686	259072	chr7	-	105.203	105.204	UNC12235633	chr6	140.205	138.613	141.408	7.65396	8.47669	6.26165	9.29055	trans
17494596	Tpp1	tripeptidyl peptidase I	12751	chr7	-	105.745	105.752	UNC8459930	chr4	151.16	149.94	152.11	7.4528	8.44645	6.1992	7.71728	trans
17494785	Olfr484	olfactory receptor 484	258492	chr7	-	108.124	108.125	UNC21863243	chr12	109.028	108.301	111.503	7.44954	8.37655	6.17727	8.75869	trans
17495029	Sbf2	SET binding factor 2	319934	chr7	-	110.308	110.615	backupUNC150939081	chr15	73.1682	72.2179	75.3793	7.49863	8.34413	6.22899	7.86241	trans
17495309	4933406I18Rik	RIKEN cDNA 4933406I18 gene	71045	chr7	-	114.316	114.415	UNC17428823	chr10	11.9625	10.8446	14.3737	7.59558	8.64962	6.24587	8.8357	trans
17495368	Nup35	nucleoporin 35	69482	chr7	-	116.084	116.085	UNC3401053	chr2	79.4861	77.3003	87.2856	7.55491	8.37277	6.19211	12.5636	trans
17240309	Mfsd4b5	major facilitator superfamily domain containing 4B5	215928	chr10	-	39.9591	39.9866	UNC25914949	chr15	76.5916	66.9033	83.2184	7.57528	8.67121	6.21468	7.94666	trans
17495566	Tmc7	transmembrane channel-like gene family 7	209760	chr7	-	118.537	118.585	UNC13767088	chr7	123.35	122.722	124.052	7.56468	8.44075	6.26142	7.88935	trans
17496742	Bcl7c	B cell CLL/lymphoma 7C	12055	chr7	-	127.664	127.709	UNC18787460	chr10	116.046	114.996	116.795	7.54076	8.61596	6.21214	8.86365	trans
17497223	Dhx32	DEAH (Asp-Glu-Ala-His) box polypeptide 32	101437	chr7	-	133.721	133.783	UNC19592744	chr11	49.8744	48.7145	52.4971	7.2863	8.14021	6.13347	7.60057	trans
17497399	Tcerg1l	transcription elongation regulator 1-like	70571	chr7	-	138.209	138.398	UNC3314779	chr2	72.2502	70.1222	72.8423	7.44523	8.45769	6.18538	7.57888	trans
17497414	Mapk1ip1	mitogen-activated protein kinase 1 interacting protein 1	69546	chr7	-	138.836	138.846	JAX00572011	chr4	155.206	153.905	155.959	7.51699	8.32442	6.25136	8.04451	trans
17497647	Olfr531	olfactory receptor 531	258955	chr7	-	140.401	140.401	UNC4383716	chr2	163.11	161.842	164.366	7.54991	8.37236	6.22789	7.95617	trans
17497687	Bet1l	Bet1 golgi vesicular membrane trafficking protein like	54399	chr7	-	140.854	140.856	UNC29081248	chr18	39.0472	38.1111	39.7152	7.61938	8.19671	6.22361	7.8332	trans
17498099	Ctsd	cathepsin D	13033	chr7	-	142.376	142.388	UNC28538918	chr17	87.3076	85.8832	87.8208	7.52062	8.32666	6.22728	7.8454	trans
17498251	Phlda2	pleckstrin homology like domain, family A, member 2	22113	chr7	-	143.502	143.503	UNC10105089	chr5	126.38	123.754	126.931	7.74947	8.55592	6.23225	8.6118	trans
17498467	Ano1	anoctamin 1, calcium activated chloride channel	101772	chr7	-	144.589	144.738	UNC11468340	chr6	80.9925	80.6816	84.7902	7.41744	8.4856	6.18977	7.8139	trans
17498607	Mcoln1	mucolipin 1	94178	chr8	+	3.50048	3.51518	JAX00158805	chr8	10.7378	3.21146	13.4768	7.48392	8.3299	6.18914	13.2289	trans
17498625	Pnpla6	patatin-like phospholipase domain containing 6	50767	chr8	+	3.51548	3.54422	UNC3651597	chr2	102.2	102.102	106.876	7.61523	8.34027	6.21733	8.50229	trans
17498699	Stxbp2	syntaxin binding protein 2	20911	chr8	+	3.631	3.64302	UNC20330705	chr11	107.581	106.209	107.932	7.6017	8.43419	6.22723	7.82839	trans
17498786	Lrrc8e	leucine rich repeat containing 8 family, member E	72267	chr8	+	4.22693	4.23744	UNC16139859	chr9	34.4187	33.4398	34.569	7.41888	8.01806	6.23922	9.23827	trans
17498810	Tgfbr3l	transforming growth factor, beta receptor III-like	100044509	chr8	+	4.24823	4.25142	UNC14144507	chr8	10.2945	3.21146	11.4635	7.29459	8.27252	6.18273	9.06097	trans
17499647	Gm26853	predicted gene, 26853	101056057	chr8	+	19.7903	19.7935	UNC10390319	chr5	147.005	146.563	147.939	7.48761	8.5375	6.14594	7.69222	trans
17240729	Fam162b	family with sequence similarity 162, member B	77296	chr10	-	51.5855	51.5905	UNC17795313	chr10	39.3488	38.5889	41.4206	7.527	8.33898	6.19313	8.6882	trans
17240746	4933411G06Rik	Sumo1 pseudogene	71090	chr10	-	51.7563	51.7572	UNC27866461	chr17	42.0483	40.6022	45.9545	7.41775	8.23109	6.18656	7.80357	trans
17240880	Man1a	mannosidase 1, alpha	17155	chr10	-	53.905	54.0758	UNC17933626	chr10	49.8514	46.082	54.3694	7.49809	8.37204	6.18232	11.764	trans
17500209	Kcnu1	potassium channel, subfamily U, member 1	16532	chr8	+	25.8496	25.9379	UNC12209527	chr6	138.67	137.372	141.304	7.676	8.39748	6.14373	8.20952	trans
17500248	Rnf170	ring finger protein 170	77733	chr8	+	26.1195	26.1438	UNC12519613	chr7	25.982	24.2569	26.3647	7.41179	8.15635	6.15499	17.7038	trans
17500391	Rnf122	ring finger protein 122	68867	chr8	+	31.112	31.1303	UNC25904916	chr15	75.4968	74.5823	75.6583	7.42058	8.10238	6.2064	7.92189	trans
17500523	Saraf	store-operated calcium entry-associated regulatory factor	67887	chr8	+	34.1546	34.1707	UNC11467281	chr6	80.9156	78.5373	144.027	7.52002	8.46652	6.14047	7.7088	trans
17501061	Enpp6	ectonucleotide pyrophosphatase/phosphodiesterase 6	320981	chr8	+	46.987	47.0946	UNC8101999	chr4	120.932	119.129	123.378	7.66529	8.70382	6.19023	13.6348	trans
17501234	Glra3	glycine receptor, alpha 3 subunit	110304	chr8	+	55.9407	56.1254	UNC14723829	chr8	51.1352	46.4106	62.4628	7.59487	8.41392	6.29986	9.15319	trans
17501308	LOC105243194	uncharacterized LOC105243194	105243194	chr8	+	57.8	57.8028	UNC3806477	chr2	116.387	116.205	116.477	7.48862	8.13861	6.22967	7.92889	trans
17501317	BC030500	cDNA sequence BC030500	234290	chr8	+	58.9118	58.9136	JAX00134896	chr5	119.238	115.626	120.431	7.41882	8.39247	6.18787	8.28072	trans
17240901	Tbc1d32	TBC1 domain family, member 32	544696	chr10	-	56.0164	56.2246	UNC21300340	chr12	66.4358	64.7127	70.3005	7.48517	8.15795	6.16701	8.58827	trans
17501569	Nat2	N-acetyltransferase 2 (arylamine N-acetyltransferase)	17961	chr8	+	67.4949	67.5025	JAX00669465	chr8	57.7066	52.7865	67.5646	7.44358	8.37068	6.13175	7.82252	trans
17501755	Pbx4	pre B cell leukemia homeobox 4	80720	chr8	+	69.8328	69.8729	UNC6478926	chr3	146.633	146.311	147.214	7.65546	8.45688	6.25828	7.73364	trans
17501800	Hapln4	hyaluronan and proteoglycan link protein 4	330790	chr8	+	70.0835	70.0906	JAX00672474	chr8	74.6024	68.6978	76.2271	7.50903	8.55104	6.19222	11.9892	trans
17502051	Il12rb1	interleukin 12 receptor, beta 1	16161	chr8	+	70.8085	70.8213	UNC9209363	chr5	54.3138	51.765	57.8149	7.79953	8.84268	6.2938	8.78489	trans
17502260	Fam129c	family with sequence similarity 129, member C	100037278	chr8	+	71.5977	71.6078	UNC15025275	chr8	76.1968	70.7895	79.0984	7.56307	8.55711	6.28039	13.9174	trans
17502295	Jak3	Janus kinase 3	16453	chr8	+	71.6763	71.6905	UNC15020516	chr8	75.7027	71.6651	77.1207	7.50172	8.73325	6.24795	16.5561	trans
17502537	Hmgxb4	HMG box domain containing 4	70823	chr8	+	74.9935	75.0306	UNC22845435	chr13	72.6463	72.1463	72.8153	7.39969	8.46475	6.20818	8.3774	trans
17502609	Iqcm	IQ motif containing M	71831	chr8	+	75.4487	75.9845	UNC26798454	chr16	49.9656	49.6808	58.2005	7.48809	8.2276	6.2281	8.70091	trans
17503092	Mir709	microRNA 709	735271	chr8	+	84.0861	84.0862	UNC12053693	chr6	127.943	126.752	135.086	7.50923	8.44356	6.20614	9.98265	trans
17503208	Lyl1	lymphoblastomic leukemia 1	17095	chr8	+	84.7016	84.7047	UNC6171121	chr3	125.856	122.666	126.208	7.45042	8.277	6.27293	7.53011	trans
17503616	Adcy7	adenylate cyclase 7	11513	chr8	+	88.2724	88.3297	UNC26105975	chr15	91.4463	90.8888	92.4848	7.48146	8.27178	6.19546	8.74972	trans
17241294	Fam241b	family with sequence similarity 241, member B	69894	chr10	-	62.1079	62.1439	UNC18610132	chr10	104.222	101.218	106.078	7.46195	8.58712	6.23869	9.28744	trans
17504074	Cpne2	copine II	234577	chr8	+	94.533	94.5703	UNC20152865	chr11	93.3353	90.2186	93.9654	7.53313	8.4104	6.18932	8.84216	trans
17504998	Nrn1l	neuritin 1-like	234700	chr8	+	105.894	105.895	UNC10313960	chr5	141.116	140.781	142.053	7.422	8.54684	6.21254	8.11624	trans
17505367	Txnl4b	thioredoxin-like 4B	234723	chr8	+	109.566	109.574	backupJAX00493053	chr2	73.2865	72.2502	90.154	7.55322	8.59711	6.14767	7.75739	trans
17505426	Ap1g1	adaptor protein complex AP-1, gamma 1 subunit	11765	chr8	+	109.779	109.861	UNC17511821	chr10	18.1905	12.9169	19.7495	7.44425	8.17661	6.15286	7.47677	trans
17506112	Dnaaf1	dynein, axonemal assembly factor 1	68270	chr8	+	119.575	119.598	JAX00062008	chr15	52.265	51.7838	55.7756	7.58109	8.45581	6.2625	7.91718	trans
17506230	6430548M08Rik	RIKEN cDNA 6430548M08 gene	234797	chr8	+	120.144	120.165	JAX00247992	chr1	39.7324	35.7117	40.2677	7.67445	8.69301	6.24314	7.68022	trans
17506230	6430548M08Rik	RIKEN cDNA 6430548M08 gene	234797	chr8	+	120.144	120.165	backupUNC200618095	chrX	98.4096	95.1	102.193	7.67445	8.69301	6.24314	7.77027	trans
17506300	Foxl1	forkhead box L1	14241	chr8	+	121.128	121.131	UNC28494170	chr17	84.0794	83.2859	84.8761	7.44472	8.4937	6.13976	7.68652	trans
17506398	9330133O14Rik	RIKEN cDNA 9330133O14 gene	100689703	chr8	+	122.444	122.446	UNC21989859	chr12	117.261	116.786	117.728	7.50702	8.46202	6.19497	7.84149	trans
17506707	Rab4a	RAB4A, member RAS oncogene family	19341	chr8	+	123.834	123.835	UNC17248287	chr9	119.36	32.4732	120.832	7.594	8.74819	6.22244	8.18685	trans
17506824	Gnpat	glyceronephosphate O-acyltransferase	14712	chr8	+	124.863	124.89	UNC28778436	chr18	15.1547	14.3599	15.9341	7.53039	8.37376	6.19976	8.60864	trans
17507236	4932443L11Rik	RIKEN cDNA 4932443L11 gene	78899	chr8	-	4.16257	4.20636	UNC14119282	chr8	8.60276	7.08959	10.7383	7.51431	8.29462	6.21702	10.5112	trans
17507347	Fam155a	family with sequence similarity 155, member A	270028	chr8	-	9.20653	9.77099	UNC160157865	chr16	25.4073	22.6769	25.573	7.68129	8.29319	6.25744	7.82574	trans
17507637	Rasa3	RAS p21 protein activator 3	19414	chr8	-	13.5671	13.6775	JAX00112393	chr3	119.786	108.37	126.208	7.56644	8.33852	6.19039	7.71203	trans
17507872	2610005L07Rik	cadherin 11 pseudogene	381598	chr8	-	20.3863	20.3879	UNC13030314	chr7	66.5805	53.8518	67.0035	7.38625	8.45791	6.21172	8.81252	trans
17507940	Defb9	defensin beta 9	246079	chr8	-	21.8818	21.8819	UNC2463658	chr1	194.676	191.383	195.36	7.4677	8.25839	6.17621	7.64452	trans
17241672	4930545H06Rik	RIKEN cDNA 4930545H06 gene	75148	chr10	-	68.3191	68.3211	UNC7636559	chr4	84.0872	84.0477	87.0432	7.43325	8.32148	6.17919	9.87238	trans
17508729	B930018H19Rik	RIKEN cDNA B930018H19 gene	330734	chr8	-	34.5895	34.6403	UNC123662	chr1	12.741	10.2115	15.5581	7.64994	8.43493	6.25502	7.73396	trans
17508850	Msr1	macrophage scavenger receptor 1	20288	chr8	-	39.5818	39.6427	JAX00272130	chr1	154.233	149.275	165.676	7.37191	8.12172	6.21971	8.24738	trans
17509005	Adam26a	a disintegrin and metallopeptidase domain 26A (testase 3)	13525	chr8	-	43.5683	43.5688	UNC13870034	chr7	131.59	131.316	132.686	7.54786	8.61077	6.27703	8.52859	trans
17509171	Slc25a4	solute carrier family 25 (mitochondrial carrier, adenine nucleotide translocator), member 4	11739	chr8	-	46.2069	46.2113	UNC6132276	chr3	123.52	122.536	126.833	7.40109	8.60155	6.17341	7.88253	trans
17509537	Palld	palladin, cytoskeletal associated protein	72333	chr8	-	61.5133	61.9027	UNC24137114	chr14	65.6215	64.559	67.222	7.56701	8.46305	6.20303	8.35209	trans
17510099	Ssbp4	single stranded DNA binding protein 4	76900	chr8	-	70.5975	70.6026	UNC030199698	chr3	123.716	122.536	126.116	7.53461	8.25563	6.22932	8.12618	trans
17510318	Ano8	anoctamin 8	382014	chr8	-	71.4761	71.486	UNC14789121	chr8	56.4498	53.3315	73.068	7.42608	8.32559	6.13521	9.17124	trans
17241981	Mmp11	matrix metallopeptidase 11	17385	chr10	-	75.9232	75.9406	JAX00320357	chr11	102.622	40.6495	105.578	7.3874	8.2122	6.18683	7.67997	trans
17510635	Gm10649	predicted gene 10649	100039211	chr8	-	76.7495	76.9002	JAX00287611	chr10	39.3989	38.5889	40.213	7.46041	8.06543	6.19005	25.4029	trans
17511075	Mir181c	microRNA 181c	723819	chr8	-	84.1789	84.1789	UNC27933315	chr17	46.6573	45.1305	47.2428	7.37995	8.41445	6.15246	8.60255	trans
17511096	D8Ertd738e	DNA segment, Chr 8, ERATO Doi 738, expressed	101966	chr8	-	84.2463	84.2498	UNC19543169	chr11	45.8709	44.1248	46.673	7.47649	8.36846	6.14825	8.51853	trans
17511310	Zfp791	zinc finger protein 791	244556	chr8	-	85.1097	85.1231	UNC15283571	chr8	94.2435	93.4356	94.4756	7.53799	8.35767	6.19448	9.43741	trans
17511482	Zfp423	zinc finger protein 423	94187	chr8	-	87.6619	87.9596	backupUNC160349027	chr16	54.6549	3.16841	58.4412	7.56359	8.37076	6.21434	7.86703	trans
17511567	Aktip	thymoma viral proto-oncogene 1 interacting protein	14339	chr8	-	91.1121	91.1344	JAX00568817	chr4	140.559	139.756	141.35	7.38398	8.18071	6.1661	8.85535	trans
17511630	Crnde	colorectal neoplasia differentially expressed (non-protein coding)	71296	chr8	-	92.3262	92.3561	UNC150300586	chr15	93.3609	91.8454	94.1435	7.4358	8.35293	6.19822	7.86642	trans
17512193	Cmtm2a	CKLF-like MARVEL transmembrane domain containing 2A	73381	chr8	-	104.281	104.31	UNC28587378	chr17	90.3532	88.8896	94.8265	7.52281	8.37855	6.20728	7.5961	trans
17512388	Fhod1	formin homology 2 domain containing 1	234686	chr8	-	105.329	105.348	JAX00321074	chr11	106.648	106.601	107.932	7.49764	8.35146	6.19756	8.7729	trans
17512666	Smpd3	sphingomyelin phosphodiesterase 3, neutral	58994	chr8	-	106.253	106.338	UNC3470473	chr2	86.3844	75.7739	91.6018	7.44856	8.246	6.19069	8.69721	trans
17242207	Pcbp3	poly(rC) binding protein 3	59093	chr10	-	76.7621	76.9619	UNC6053649	chr3	117.822	115.462	121.48	7.47366	8.5455	6.17067	7.47673	trans
17242207	Pcbp3	poly(rC) binding protein 3	59093	chr10	-	76.7621	76.9619	UNC9367702	chr5	66.5193	64.2267	68.856	7.47366	8.5455	6.17067	7.63546	trans
17512776	Gm1943	WD repeat domain 70 pseudogene	384864	chr8	-	109.34	109.341	UNC020085719	chr2	63.9068	62.4514	64.706	7.42639	8.39544	6.12812	10.0068	trans
17512776	Gm1943	WD repeat domain 70 pseudogene	384864	chr8	-	109.34	109.341	JAX00392863	chr15	8.07865	7.69778	8.54746	7.42639	8.39544	6.12812	57.1429	trans
17513149	Ctrb1	chymotrypsinogen B1	66473	chr8	-	111.687	111.691	JAX00676629	chr8	92.7918	89.0634	94.4756	7.5257	8.59532	6.22841	7.65149	trans
17513166	Cfdp1	craniofacial development protein 1	23837	chr8	-	111.769	111.854	UNC9968949	chr5	115.532	112.835	117.489	7.54622	8.40538	6.19763	8.02503	trans
17513232	Gm9564	predicted gene 9564	672498	chr8	-	112.025	112.028	UNC10784417	chr6	27.9014	24.5052	30.0074	7.44943	8.14066	6.17382	7.52196	trans
17513534	1190005I06Rik	RIKEN cDNA 1190005I06 gene	68918	chr8	-	120.609	120.634	UNC24069559	chr14	59.6913	58.2672	64.559	7.44853	8.29389	6.18113	7.59274	trans
17513779	Galns	galactosamine (N-acetyl)-6-sulfate sulfatase	50917	chr8	-	122.579	122.611	UNC2011729	chr1	156.678	151.799	173.646	7.42555	8.41715	6.26177	7.46443	trans
17514211	Tarbp1	TAR RNA binding protein 1	212728	chr8	-	126.427	126.475	UNC5464045	chr3	69.2791	66.7672	69.8403	7.51033	8.28513	6.21434	7.99846	trans
17514257	Rbm34	RNA binding motif protein 34	52202	chr8	-	126.947	126.971	UNC190012516	chr19	19.6082	18.0464	21.3988	7.41979	8.34043	6.17195	8.38684	trans
17514417	Msantd4	Myb/SANT-like DNA-binding domain containing 4 with coiled-coils	78100	chr9	+	4.3836	4.38658	UNC11503636	chr6	83.4746	74.7592	86.3242	7.6856	8.43261	6.21949	8.33607	trans
17514760	Mre11a	MRE11A homolog A, double strand break repair nuclease	17535	chr9	+	14.7847	14.8343	JAX00684548	chr9	3.36987	3.36987	16.5811	7.63801	8.39681	6.23114	9.12131	trans
17242589	Mier2	MIER family member 2	70427	chr10	-	79.5403	79.5551	JAX00545689	chr4	14.39	13.2365	14.8057	7.47986	8.40296	6.24809	9.87498	trans
17515019	Pin1	protein (peptidyl-prolyl cis/trans isomerase) NIMA-interacting 1	23988	chr9	+	20.6554	20.6659	UNC2350552	chr1	184.445	47.1028	186.139	7.47929	8.59294	6.22469	7.78785	trans
17515058	Ppan	peter pan homolog	235036	chr9	+	20.8895	20.8896	UNC15898646	chr9	16.061	15.7664	23.3399	7.54946	8.32771	6.22758	10.1859	trans
17515062	Mrpl4	mitochondrial ribosomal protein L4	66163	chr9	+	21.0028	21.0088	UNC16035684	chr9	26.4086	15.8187	27.44	7.47034	8.33575	6.19754	8.49893	trans
17515344	Ccdc159	coiled-coil domain containing 159	67119	chr9	+	21.9277	21.9356	UNC8325771	chr4	138.288	137.562	139.622	7.62753	8.56393	6.19992	7.88618	trans
17515375	Prkcsh	protein kinase C substrate 80K-H	19089	chr9	+	22.003	22.0142	UNC15905886	chr9	16.5246	16.0827	23.2006	7.59283	8.47295	6.18517	10.1514	trans
17515425	Zfp809	zinc finger protein 809	235047	chr9	+	22.2257	22.2433	UNC15923067	chr9	17.6701	15.6873	28.6765	7.56917	8.57633	6.23867	7.92633	trans
17516118	Olfr877	olfactory receptor 877	258412	chr9	+	37.8548	37.8557	UNC15290886	chr8	94.9322	92.7425	95.7086	7.67196	8.70273	6.25193	8.3371	trans
17516159	Olfr251	olfactory receptor 251	404313	chr9	+	38.378	38.3787	UNC28848668	chr18	20.6605	15.8652	23.7737	7.55307	8.46802	6.25399	7.80735	trans
17516194	Vwa5a	von Willebrand factor A domain containing 5A	67776	chr9	+	38.7183	38.7419	UNC24202144	chr14	70.5272	68.7625	76.1613	7.5646	8.34861	6.22385	7.65772	trans
17516265	Olfr954	olfactory receptor 954	258328	chr9	+	39.4617	39.4622	JAX00638880	chr7	50.7435	50.2817	67.9342	7.66773	8.56191	6.29837	8.30245	trans
17516284	Olfr969	olfactory receptor 969	258823	chr9	+	39.7958	39.7962	UNC7677604	chr4	87.1188	85.8812	101.291	7.55677	8.56508	6.19672	7.69484	trans
17516383	Snord14e	small nucleolar RNA, C/D box 14E	100302594	chr9	+	40.8047	40.8048	UNC18597230	chr10	103.37	101.31	109.502	7.54948	8.38142	6.14217	7.56714	trans
17516488	C1qtnf5	C1q and tumor necrosis factor related protein 5	235312	chr9	+	44.1017	44.1091	UNC9185077	chr5	52.4748	49.1239	53.8809	7.55708	8.28843	6.1857	8.19769	trans
17516718	Jaml	junction adhesion molecule like	270152	chr9	+	45.0792	45.1077	UNC27395639	chr16	91.868	91.0418	92.6324	7.49779	8.37035	6.19524	7.72524	trans
17516871	Sik3	SIK family kinase 3	70661	chr9	+	46.0128	46.2236	UNC10315611	chr5	141.229	140.586	143.543	7.42645	8.2264	6.23681	7.58686	trans
17517175	Ppp2r1b	protein phosphatase 2, regulatory subunit A, beta	73699	chr9	+	50.8453	50.8932	UNC6050292	chr3	117.606	108.968	119.661	7.44228	8.2615	6.20607	9.83802	trans
17517175	Ppp2r1b	protein phosphatase 2, regulatory subunit A, beta	73699	chr9	+	50.8453	50.8932	UNC8661772	chr5	13.4732	8.68897	17.3595	7.44228	8.2615	6.20607	7.81738	trans
17517270	Gm29692	predicted gene, 29692	100048185	chr9	+	52.4033	52.4164	UNC1706873	chr1	133.403	130.277	135.913	7.47506	8.37233	6.24953	8.86163	trans
17517346	Gm16124	predicted gene 16124	102636154	chr9	+	53.6673	53.6813	UNC3320136	chr2	72.6939	72.2315	73.7111	7.54951	8.67731	6.18877	7.98593	trans
17517481	Ube2q2	ubiquitin-conjugating enzyme E2Q family member 2	109161	chr9	+	55.1489	55.2071	backupUNC090098276	chr9	51.1486	45.2048	57.5965	7.51219	8.44881	6.18189	7.6562	trans
17517799	Ubl7	ubiquitin-like 7 (bone marrow stromal cell-derived)	69459	chr9	+	57.911	57.9299	JAX00032362	chr11	118.684	118.442	120.626	7.57641	8.48238	6.20675	7.92092	trans
17242924	Uqcr11	ubiquinol-cytochrome c reductase, complex III subunit XI	66594	chr10	-	80.403	80.4068	UNC10878774	chr6	35.897	34.989	36.2604	7.42095	8.22146	6.19829	9.21107	trans
17243157	Diras1	DIRAS family, GTP-binding RAS-like 1	208666	chr10	-	81.0196	81.0256	UNC25316780	chr15	32.0336	27.0896	32.5984	7.59157	8.70136	6.23551	7.99608	trans
17518628	Oaz2	ornithine decarboxylase antizyme 2	18247	chr9	+	65.6766	65.6903	UNC16111689	chr9	32.4503	30.9126	34.4905	7.60739	8.49167	6.2005	8.71528	trans
17519349	Gm16551	predicted gene 16551	100503019	chr9	+	74.8485	74.86	UNC16589714	chr9	70.5441	69.5782	71.0105	7.57748	8.50151	6.24383	8.18464	trans
17519394	Myo5a	myosin VA	17918	chr9	+	75.0714	75.2199	UNC2349225	chr1	184.323	183.805	185.746	7.44564	8.25998	6.1376	8.13888	trans
17519619	Ick	intestinal cell kinase	56542	chr9	+	78.1092	78.1705	UNC29747228	chr18	84.0372	83.726	90.595	7.57447	8.51123	6.17678	9.57828	trans
17519794	Senp6	SUMO/sentrin specific peptidase 6	215351	chr9	+	80.0874	80.1446	UNC20502635	chr11	118.543	117.524	120.626	7.46108	8.54315	6.1576	8.11519	trans
17519906	Gm2109	predicted gene 2109	100039222	chr9	+	83.6915	83.6932	UNC17862610	chr10	44.6075	43.8185	46.1434	7.44254	8.24402	6.20259	7.71932	trans
17520063	Mrap2	melanocortin 2 receptor accessory protein 2	244958	chr9	+	87.1443	87.1839	UNC021713399	chr2	177.86	173.869	181.846	7.95427	8.88087	6.35156	10.1553	trans
17520146	Trim43c	tripartite motif-containing 43C	666731	chr9	+	88.8405	88.8478	JAX00138802	chr6	23.1697	21.3665	23.4962	7.51117	8.16048	6.2238	17.083	trans
17520560	Tfdp2	transcription factor Dp 2	211586	chr9	+	96.1964	96.3228	UNC12209527	chr6	138.67	135.206	141.441	7.46536	8.17057	6.22213	8.08315	trans
17520815	Msl2	MSL complex subunit 2	77853	chr9	+	101.075	101.105	UNC26289351	chr16	7.26769	5.26138	8.08266	7.56404	8.4713	6.16187	7.72223	trans
17243382	Gna15	guanine nucleotide binding protein, alpha 15	14676	chr10	-	81.5024	81.5241	backupJAX00639804	chr7	55.1698	50.1543	66.1776	7.48648	8.37536	6.24598	7.90458	trans
17520905	Slco2a1	solute carrier organic anion transporter family, member 2a1	24059	chr9	+	103.009	103.088	UNC27438972	chr16	94.6951	92.8266	95.443	7.32867	8.27437	6.19662	7.55563	trans
17521661	Amt	aminomethyltransferase	434437	chr9	+	108.297	108.302	JAX00474507	chr19	26.3512	25.152	26.9866	7.47073	8.47277	6.16832	9.43514	trans
17521762	Usp19	ubiquitin specific peptidase 19	71472	chr9	+	108.491	108.502	UNC17029555	chr9	103.679	103.638	108.604	7.3703	8.20099	6.18624	7.53788	trans
17521858	Dalrd3	DALR anticodon binding domain containing 3	67789	chr9	+	108.57	108.573	UNC8522480	chr4	155.114	154.912	155.848	7.3955	8.13189	6.19946	8.65416	trans
17521971	Slc26a6	solute carrier family 26, member 6	171429	chr9	+	108.854	108.913	JAX00172073	chr9	63.2609	60.7084	63.6846	7.48038	8.47795	6.16164	8.33259	trans
17522577	Lrrfip2	leucine rich repeat (in FLII) interacting protein 2	71268	chr9	+	111.118	111.224	backupUNC010206009	chr1	106.467	99.9528	122.312	7.5136	8.33823	6.18928	7.8572	trans
17522626	Dclk3	doublecortin-like kinase 3	245038	chr9	+	111.439	111.489	UNC7685064	chr4	87.7181	87.2057	89.0781	7.67034	8.59221	6.23043	8.74991	trans
17522651	Clasp2	CLIP associating protein 2	76499	chr9	+	113.742	113.919	JAX00308772	chr11	40.4848	35.3964	42.7778	7.47535	8.12894	6.19661	8.95551	trans
17523177	Rpsa	ribosomal protein SA	16785	chr9	+	120.132	120.132	UNC27823620	chr17	35.9056	34.0451	91.6328	7.50188	8.29024	6.23099	7.56782	trans
17523190	Snora62	small nucleolar RNA, H/ACA box 62	104433	chr9	+	120.13	120.131	UNC27736393	chr17	28.6578	26.037	31.3536	7.37037	8.12793	6.22022	8.08016	trans
17523257	Gm38502	predicted gene, 38502	102637827	chr9	+	120.929	120.96	UNC28538918	chr17	87.3076	85.9599	88.3124	7.50371	8.45871	6.22799	7.64613	trans
17523371	Ackr2	atypical chemokine receptor 2	59289	chr9	+	121.898	121.911	UNC12252510	chr6	141.322	137.013	142.478	7.45408	8.32837	6.17641	7.60244	trans
17523486	Zfp105	zinc finger protein 105	22646	chr9	+	122.923	122.931	UNC17194132	chr9	115.729	115.445	116.568	7.51071	8.49665	6.20928	8.78059	trans
17523608	Sacm1l	SAC1 suppressor of actin mutations 1-like (yeast)	83493	chr9	+	123.542	123.593	UNC22194525	chr13	17.9759	13.2686	20.105	7.50322	8.19394	6.18654	8.45038	trans
17523682	4930433N12Rik	RIKEN cDNA 4930433N12 gene	114673	chr9	-	3.1903	3.19974	UNC15903337	chr9	16.3342	3.36987	23.3399	7.53536	8.31819	6.20735	8.81754	trans
17524233	Fat3	FAT atypical cadherin 3	270120	chr9	-	15.9142	16.3756	UNC23080993	chr13	91.3693	89.5661	94.1599	7.57945	8.44847	6.24505	8.16244	trans
[truncated: 973 more rows]

## Sheet: Table S4
Supplemental Table 3: List of all significant cis-mirQTL found in the liver of DO mice using diet as an additive covariate.
[truncated: 20 more rows]

[truncated: 9 more sheets: Table S5, Table S6, Table S7, Table S8, Table S9, Table S10, Table S11, Table S12, Table S13]
